# Supplementary material for: ERBB3 is a marker of a ganglioneuroblastoma/ganglioneuroma-like expression profile in neuroblastic tumours
Source: Mol Cancer. 2013 Jul 8;12:70. doi: 10.1186/1476-4598-12-70 (PMC3766266; doi:10.1186/1476-4598-12-70)
Supplement: Additional file 7 — GSEA results. Results of Gene set enrichment analysis (GSEA) from each comparison and each data set are presented in each sheet. Data sets 1–3 (DePreter, McArdle/Wilzén, and Wang) comparisons are according to r-subgroups (r1-r4), and data set 4 (Versteeg) comparisons are according to histopathology groups; Ganglioneuroma (GN), Ganglioneuroblastoma (GNB), and Neuroblastoma (NB). Enrichments were run with 1000 permutations, permutation type = gene set, and gene list sorting mode = real (scoring both extremes) in descending order. Results per data set and comparison in each sheet are presented as follows: NAME = name of the gene set, SIZE = Size of the gene set, ES = enrichment score, NES = Normalized enrichment score, NOM p-val = Nominal p-value, FDR q-val = False Discovery Rate, FWER p-val = Familywise-error rate, RANK AT MAX = The position in the ranked list at which the maximum enrichment score occurred, LEADING EDGE = Displays the three statistics used to define the leading edge subset. In addition, the r3 versus r1 comparisons in data sets 1–3 were investigated and presented as gene list sorting mode = abs. [file 1476-4598-12-70-S7.xlsx]

## Sheet: DePreter_r2vsr1_report_r2
NAME	GS<br> follow link to MSigDB	GS DETAILS	SIZE	ES	NES	NOM p-val	FDR q-val	FWER p-val	RANK AT MAX	LEADING EDGE
ROSTY_CERVICAL_CANCER_PROLIFERATION_CLUSTER	ROSTY_CERVICAL_CANCER_PROLIFERATION_CLUSTER	Details ...	97	0.8854663	2.9462883	0.0	0.0	0.0	422	tags=70%, list=6%, signal=73%
SOTIRIOU_BREAST_CANCER_GRADE_1_VS_3_UP	SOTIRIOU_BREAST_CANCER_GRADE_1_VS_3_UP	Details ...	116	0.83818275	2.890576	0.0	0.0	0.0	455	tags=55%, list=6%, signal=58%
CHIANG_LIVER_CANCER_SUBCLASS_PROLIFERATION_UP	CHIANG_LIVER_CANCER_SUBCLASS_PROLIFERATION_UP	Details ...	106	0.81328505	2.764257	0.0	0.0	0.0	289	tags=45%, list=4%, signal=46%
LEE_EARLY_T_LYMPHOCYTE_UP	LEE_EARLY_T_LYMPHOCYTE_UP	Details ...	63	0.8632758	2.7430422	0.0	0.0	0.0	311	tags=60%, list=4%, signal=62%
GRAHAM_CML_DIVIDING_VS_NORMAL_QUIESCENT_UP	GRAHAM_CML_DIVIDING_VS_NORMAL_QUIESCENT_UP	Details ...	136	0.80273825	2.7412622	0.0	0.0	0.0	534	tags=53%, list=7%, signal=56%
CROONQUIST_IL6_DEPRIVATION_DN	CROONQUIST_IL6_DEPRIVATION_DN	Details ...	69	0.8484398	2.7158384	0.0	0.0	0.0	626	tags=71%, list=8%, signal=77%
GRAHAM_NORMAL_QUIESCENT_VS_NORMAL_DIVIDING_DN	GRAHAM_NORMAL_QUIESCENT_VS_NORMAL_DIVIDING_DN	Details ...	66	0.84839904	2.7092931	0.0	0.0	0.0	582	tags=68%, list=8%, signal=73%
DUTERTRE_ESTRADIOL_RESPONSE_24HR_UP	DUTERTRE_ESTRADIOL_RESPONSE_24HR_UP	Details ...	160	0.76988876	2.7018373	0.0	0.0	0.0	897	tags=60%, list=12%, signal=67%
CHANG_CYCLING_GENES	CHANG_CYCLING_GENES	Details ...	84	0.8186348	2.6923118	0.0	0.0	0.0	719	tags=62%, list=10%, signal=68%
CROONQUIST_NRAS_SIGNALING_DN	CROONQUIST_NRAS_SIGNALING_DN	Details ...	58	0.8535671	2.6777897	0.0	0.0	0.0	500	tags=66%, list=7%, signal=70%
KOBAYASHI_EGFR_SIGNALING_24HR_DN	KOBAYASHI_EGFR_SIGNALING_24HR_DN	Details ...	171	0.7634374	2.666631	0.0	0.0	0.0	913	tags=60%, list=12%, signal=66%
NAKAYAMA_SOFT_TISSUE_TUMORS_PCA2_UP	NAKAYAMA_SOFT_TISSUE_TUMORS_PCA2_UP	Details ...	60	0.85049975	2.6596682	0.0	0.0	0.0	516	tags=57%, list=7%, signal=60%
ZHOU_CELL_CYCLE_GENES_IN_IR_RESPONSE_24HR	ZHOU_CELL_CYCLE_GENES_IN_IR_RESPONSE_24HR	Details ...	79	0.8266513	2.658653	0.0	0.0	0.0	341	tags=57%, list=5%, signal=59%
TANG_SENESCENCE_TP53_TARGETS_DN	TANG_SENESCENCE_TP53_TARGETS_DN	Details ...	39	0.8961345	2.64705	0.0	0.0	0.0	222	tags=67%, list=3%, signal=68%
KANG_DOXORUBICIN_RESISTANCE_UP	KANG_DOXORUBICIN_RESISTANCE_UP	Details ...	41	0.8945799	2.6376035	0.0	0.0	0.0	455	tags=80%, list=6%, signal=85%
WHITEFORD_PEDIATRIC_CANCER_MARKERS	WHITEFORD_PEDIATRIC_CANCER_MARKERS	Details ...	79	0.8040086	2.622171	0.0	0.0	0.0	751	tags=61%, list=10%, signal=67%
KONG_E2F3_TARGETS	KONG_E2F3_TARGETS	Details ...	49	0.86387354	2.6159391	0.0	0.0	0.0	312	tags=69%, list=4%, signal=72%
ZHAN_MULTIPLE_MYELOMA_PR_UP	ZHAN_MULTIPLE_MYELOMA_PR_UP	Details ...	32	0.9176735	2.6035233	0.0	0.0	0.0	184	tags=75%, list=2%, signal=77%
GAVIN_FOXP3_TARGETS_CLUSTER_P6	GAVIN_FOXP3_TARGETS_CLUSTER_P6	Details ...	47	0.8554561	2.5794086	0.0	0.0	0.0	617	tags=64%, list=8%, signal=69%
ZHANG_TLX_TARGETS_60HR_DN	ZHANG_TLX_TARGETS_60HR_DN	Details ...	163	0.73229265	2.5769203	0.0	0.0	0.0	784	tags=52%, list=11%, signal=56%
ZHOU_CELL_CYCLE_GENES_IN_IR_RESPONSE_6HR	ZHOU_CELL_CYCLE_GENES_IN_IR_RESPONSE_6HR		52	0.82940304	2.5517695	0.0	0.0	0.0	903	tags=77%, list=12%, signal=87%
GOBERT_OLIGODENDROCYTE_DIFFERENTIATION_UP	GOBERT_OLIGODENDROCYTE_DIFFERENTIATION_UP		295	0.7047329	2.550217	0.0	0.0	0.0	1076	tags=49%, list=14%, signal=56%
HORIUCHI_WTAP_TARGETS_DN	HORIUCHI_WTAP_TARGETS_DN		193	0.7221934	2.5497835	0.0	0.0	0.0	796	tags=38%, list=11%, signal=41%
WINNEPENNINCKX_MELANOMA_METASTASIS_UP	WINNEPENNINCKX_MELANOMA_METASTASIS_UP		101	0.7567037	2.548793	0.0	0.0	0.0	630	tags=46%, list=8%, signal=49%
BURTON_ADIPOGENESIS_3	BURTON_ADIPOGENESIS_3		68	0.7946577	2.5453963	0.0	0.0	0.0	422	tags=56%, list=6%, signal=59%
ODONNELL_TFRC_TARGETS_DN	ODONNELL_TFRC_TARGETS_DN		57	0.8163912	2.5391257	0.0	0.0	0.0	691	tags=54%, list=9%, signal=59%
RHODES_UNDIFFERENTIATED_CANCER	RHODES_UNDIFFERENTIATED_CANCER		56	0.8166851	2.5357304	0.0	0.0	0.0	500	tags=52%, list=7%, signal=55%
FARMER_BREAST_CANCER_CLUSTER_2	FARMER_BREAST_CANCER_CLUSTER_2		25	0.92711794	2.527446	0.0	0.0	0.0	180	tags=68%, list=2%, signal=69%
MORI_LARGE_PRE_BII_LYMPHOCYTE_UP	MORI_LARGE_PRE_BII_LYMPHOCYTE_UP		63	0.78411806	2.5176306	0.0	0.0	0.0	718	tags=48%, list=10%, signal=52%
AMUNDSON_GAMMA_RADIATION_RESPONSE	AMUNDSON_GAMMA_RADIATION_RESPONSE		29	0.8997067	2.5146167	0.0	0.0	0.0	245	tags=69%, list=3%, signal=71%
GRAHAM_CML_QUIESCENT_VS_NORMAL_QUIESCENT_UP	GRAHAM_CML_QUIESCENT_VS_NORMAL_QUIESCENT_UP		64	0.78124845	2.5003507	0.0	0.0	0.0	396	tags=47%, list=5%, signal=49%
VECCHI_GASTRIC_CANCER_EARLY_UP	VECCHI_GASTRIC_CANCER_EARLY_UP		216	0.7010327	2.4852893	0.0	0.0	0.0	640	tags=38%, list=9%, signal=40%
SHEDDEN_LUNG_CANCER_POOR_SURVIVAL_A6	SHEDDEN_LUNG_CANCER_POOR_SURVIVAL_A6		299	0.683405	2.4759657	0.0	0.0	0.0	862	tags=39%, list=12%, signal=42%
MISSIAGLIA_REGULATED_BY_METHYLATION_DN	MISSIAGLIA_REGULATED_BY_METHYLATION_DN		91	0.745471	2.470844	0.0	0.0	0.0	694	tags=49%, list=9%, signal=54%
WHITFIELD_CELL_CYCLE_LITERATURE	WHITFIELD_CELL_CYCLE_LITERATURE		35	0.8598696	2.4658864	0.0	0.0	0.0	277	tags=66%, list=4%, signal=68%
MORI_IMMATURE_B_LYMPHOCYTE_DN	MORI_IMMATURE_B_LYMPHOCYTE_DN		66	0.77002287	2.4658113	0.0	0.0	0.0	718	tags=52%, list=10%, signal=57%
CHEMNITZ_RESPONSE_TO_PROSTAGLANDIN_E2_UP	CHEMNITZ_RESPONSE_TO_PROSTAGLANDIN_E2_UP		83	0.74701566	2.45074	0.0	0.0	0.0	841	tags=46%, list=11%, signal=51%
ZHANG_TLX_TARGETS_UP	ZHANG_TLX_TARGETS_UP		47	0.80467707	2.4499164	0.0	0.0	0.0	694	tags=68%, list=9%, signal=75%
HOFFMANN_LARGE_TO_SMALL_PRE_BII_LYMPHOCYTE_UP	HOFFMANN_LARGE_TO_SMALL_PRE_BII_LYMPHOCYTE_UP		109	0.7309559	2.445023	0.0	0.0	0.0	718	tags=43%, list=10%, signal=47%
SHEPARD_BMYB_TARGETS	SHEPARD_BMYB_TARGETS		43	0.8116856	2.4423878	0.0	0.0	0.0	573	tags=49%, list=8%, signal=53%
PID_PLK1_PATHWAY	PID_PLK1_PATHWAY		29	0.86432284	2.4355185	0.0	0.0	0.0	180	tags=45%, list=2%, signal=46%
SARRIO_EPITHELIAL_MESENCHYMAL_TRANSITION_UP	SARRIO_EPITHELIAL_MESENCHYMAL_TRANSITION_UP		103	0.71601343	2.4327798	0.0	0.0	0.0	1013	tags=49%, list=14%, signal=55%
PUJANA_BRCA2_PCC_NETWORK	PUJANA_BRCA2_PCC_NETWORK		291	0.6680426	2.4154353	0.0	0.0	0.0	1151	tags=47%, list=15%, signal=53%
FERREIRA_EWINGS_SARCOMA_UNSTABLE_VS_STABLE_UP	FERREIRA_EWINGS_SARCOMA_UNSTABLE_VS_STABLE_UP		81	0.730643	2.4079757	0.0	0.0	0.0	944	tags=49%, list=13%, signal=56%
YU_MYC_TARGETS_UP	YU_MYC_TARGETS_UP		30	0.84082204	2.3894196	0.0	0.0	0.0	533	tags=60%, list=7%, signal=64%
LI_WILMS_TUMOR_VS_FETAL_KIDNEY_1_DN	LI_WILMS_TUMOR_VS_FETAL_KIDNEY_1_DN		129	0.69291526	2.3884733	0.0	0.0	0.0	991	tags=45%, list=13%, signal=51%
BURTON_ADIPOGENESIS_PEAK_AT_24HR	BURTON_ADIPOGENESIS_PEAK_AT_24HR		29	0.8665098	2.3856108	0.0	0.0	0.0	349	tags=66%, list=5%, signal=68%
GREENBAUM_E2A_TARGETS_UP	GREENBAUM_E2A_TARGETS_UP		24	0.8874551	2.3787186	0.0	0.0	0.0	422	tags=63%, list=6%, signal=66%
VANTVEER_BREAST_CANCER_METASTASIS_DN	VANTVEER_BREAST_CANCER_METASTASIS_DN		81	0.7295865	2.3764286	0.0	0.0	0.0	626	tags=40%, list=8%, signal=43%
PUJANA_XPRSS_INT_NETWORK	PUJANA_XPRSS_INT_NETWORK		130	0.6950313	2.3737416	0.0	0.0	0.0	1469	tags=61%, list=20%, signal=74%
FUJII_YBX1_TARGETS_DN	FUJII_YBX1_TARGETS_DN		123	0.69886446	2.3733678	0.0	0.0	0.0	735	tags=44%, list=10%, signal=48%
ISHIDA_E2F_TARGETS	ISHIDA_E2F_TARGETS		36	0.823109	2.372508	0.0	0.0	0.0	422	tags=61%, list=6%, signal=64%
BASAKI_YBX1_TARGETS_UP	BASAKI_YBX1_TARGETS_UP		178	0.6746879	2.367897	0.0	0.0	0.0	306	tags=29%, list=4%, signal=29%
MARSON_BOUND_BY_E2F4_UNSTIMULATED	MARSON_BOUND_BY_E2F4_UNSTIMULATED		339	0.64903283	2.3608916	0.0	0.0	0.0	1167	tags=40%, list=16%, signal=45%
SHEPARD_CRUSH_AND_BURN_MUTANT_DN	SHEPARD_CRUSH_AND_BURN_MUTANT_DN		93	0.7097606	2.35833	0.0	0.0	0.0	804	tags=40%, list=11%, signal=44%
FURUKAWA_DUSP6_TARGETS_PCI35_DN	FURUKAWA_DUSP6_TARGETS_PCI35_DN		41	0.79340386	2.3567069	0.0	0.0	0.0	297	tags=49%, list=4%, signal=51%
BENPORATH_PROLIFERATION	BENPORATH_PROLIFERATION		98	0.6983592	2.3542767	0.0	0.0	0.0	609	tags=37%, list=8%, signal=39%
FRASOR_RESPONSE_TO_SERM_OR_FULVESTRANT_DN	FRASOR_RESPONSE_TO_SERM_OR_FULVESTRANT_DN		44	0.79270667	2.3476574	0.0	0.0	0.0	841	tags=66%, list=11%, signal=74%
KAMMINGA_EZH2_TARGETS	KAMMINGA_EZH2_TARGETS		33	0.81211585	2.3464327	0.0	0.0	0.0	704	tags=64%, list=9%, signal=70%
OXFORD_RALA_OR_RALB_TARGETS_UP	OXFORD_RALA_OR_RALB_TARGETS_UP		41	0.79275984	2.3375235	0.0	0.0	0.0	298	tags=46%, list=4%, signal=48%
REACTOME_CHROMOSOME_MAINTENANCE	REACTOME_CHROMOSOME_MAINTENANCE		55	0.74707633	2.3217583	0.0	0.0	0.0	822	tags=56%, list=11%, signal=63%
BLUM_RESPONSE_TO_SALIRASIB_DN	BLUM_RESPONSE_TO_SALIRASIB_DN		264	0.63873553	2.3143709	0.0	0.0	0.0	1147	tags=42%, list=15%, signal=48%
SONG_TARGETS_OF_IE86_CMV_PROTEIN	SONG_TARGETS_OF_IE86_CMV_PROTEIN		55	0.7432375	2.3096466	0.0	0.0	0.0	1116	tags=67%, list=15%, signal=79%
WU_APOPTOSIS_BY_CDKN1A_VIA_TP53	WU_APOPTOSIS_BY_CDKN1A_VIA_TP53		39	0.7976899	2.3016338	0.0	0.0	0.0	718	tags=56%, list=10%, signal=62%
MITSIADES_RESPONSE_TO_APLIDIN_DN	MITSIADES_RESPONSE_TO_APLIDIN_DN		207	0.64213395	2.300507	0.0	0.0	0.0	1034	tags=37%, list=14%, signal=42%
PUJANA_BRCA_CENTERED_NETWORK	PUJANA_BRCA_CENTERED_NETWORK		97	0.6907245	2.2923343	0.0	0.0	0.0	1591	tags=63%, list=21%, signal=79%
MARKEY_RB1_ACUTE_LOF_DN	MARKEY_RB1_ACUTE_LOF_DN		154	0.6530699	2.2832453	0.0	0.0	0.0	777	tags=36%, list=10%, signal=40%
REACTOME_DNA_REPLICATION	REACTOME_DNA_REPLICATION		131	0.6663264	2.2816277	0.0	0.0	0.0	777	tags=36%, list=10%, signal=39%
PUJANA_BREAST_CANCER_WITH_BRCA1_MUTATED_UP	PUJANA_BREAST_CANCER_WITH_BRCA1_MUTATED_UP		44	0.7589516	2.2739408	0.0	0.0	0.0	1126	tags=66%, list=15%, signal=77%
RUIZ_TNC_TARGETS_DN	RUIZ_TNC_TARGETS_DN		101	0.67635113	2.2698011	0.0	0.0	0.0	719	tags=45%, list=10%, signal=49%
MOLENAAR_TARGETS_OF_CCND1_AND_CDK4_DN	MOLENAAR_TARGETS_OF_CCND1_AND_CDK4_DN		24	0.8318232	2.268447	0.0	0.0	0.0	141	tags=54%, list=2%, signal=55%
KAUFFMANN_MELANOMA_RELAPSE_UP	KAUFFMANN_MELANOMA_RELAPSE_UP		37	0.7785159	2.2680914	0.0	0.0	0.0	884	tags=54%, list=12%, signal=61%
REACTOME_CELL_CYCLE_MITOTIC	REACTOME_CELL_CYCLE_MITOTIC		207	0.63831776	2.265718	0.0	0.0	0.0	777	tags=32%, list=10%, signal=35%
REN_BOUND_BY_E2F	REN_BOUND_BY_E2F		42	0.73975265	2.2636192	0.0	0.0	0.0	298	tags=45%, list=4%, signal=47%
LINDGREN_BLADDER_CANCER_CLUSTER_3_UP	LINDGREN_BLADDER_CANCER_CLUSTER_3_UP		206	0.6348166	2.2601364	0.0	0.0	0.0	884	tags=36%, list=12%, signal=40%
ZHANG_TLX_TARGETS_36HR_DN	ZHANG_TLX_TARGETS_36HR_DN		101	0.67162645	2.2581737	0.0	0.0	0.0	777	tags=43%, list=10%, signal=47%
REACTOME_CELL_CYCLE	REACTOME_CELL_CYCLE		240	0.6361785	2.2499046	0.0	0.0	0.0	777	tags=33%, list=10%, signal=36%
EGUCHI_CELL_CYCLE_RB1_TARGETS	EGUCHI_CELL_CYCLE_RB1_TARGETS		17	0.89368385	2.2439919	0.0	0.0	0.0	718	tags=94%, list=10%, signal=104%
LY_AGING_MIDDLE_DN	LY_AGING_MIDDLE_DN		14	0.9312356	2.2409039	0.0	0.0	0.0	273	tags=79%, list=4%, signal=81%
WHITFIELD_CELL_CYCLE_G2_M	WHITFIELD_CELL_CYCLE_G2_M		126	0.6502282	2.2393122	0.0	0.0	0.0	933	tags=33%, list=13%, signal=37%
LE_EGR2_TARGETS_UP	LE_EGR2_TARGETS_UP		77	0.6918753	2.233209	0.0	0.0	0.0	693	tags=47%, list=9%, signal=51%
ODONNELL_TARGETS_OF_MYC_AND_TFRC_DN	ODONNELL_TARGETS_OF_MYC_AND_TFRC_DN		23	0.84159094	2.2324665	0.0	0.0	0.0	273	tags=48%, list=4%, signal=49%
MORI_PRE_BI_LYMPHOCYTE_UP	MORI_PRE_BI_LYMPHOCYTE_UP		55	0.7197018	2.231069	0.0	0.0	0.0	890	tags=47%, list=12%, signal=53%
LY_AGING_OLD_DN	LY_AGING_OLD_DN		51	0.73253745	2.2284894	0.0	0.0	0.0	516	tags=41%, list=7%, signal=44%
SHEPARD_BMYB_MORPHOLINO_DN	SHEPARD_BMYB_MORPHOLINO_DN		108	0.65991324	2.2270029	0.0	0.0	0.0	945	tags=40%, list=13%, signal=45%
FOURNIER_ACINAR_DEVELOPMENT_LATE_DN	FOURNIER_ACINAR_DEVELOPMENT_LATE_DN		18	0.87725306	2.2216413	0.0	0.0	0.0	617	tags=67%, list=8%, signal=73%
SCIAN_CELL_CYCLE_TARGETS_OF_TP53_AND_TP73_DN	SCIAN_CELL_CYCLE_TARGETS_OF_TP53_AND_TP73_DN		19	0.86240906	2.2151203	0.0	0.0	0.0	215	tags=63%, list=3%, signal=65%
REICHERT_MITOSIS_LIN9_TARGETS	REICHERT_MITOSIS_LIN9_TARGETS		17	0.8940589	2.2128882	0.0	0.0	0.0	422	tags=76%, list=6%, signal=81%
HU_GENOTOXIC_DAMAGE_4HR	HU_GENOTOXIC_DAMAGE_4HR		23	0.819214	2.2115781	0.0	0.0	0.0	245	tags=48%, list=3%, signal=49%
BENPORATH_CYCLING_GENES	BENPORATH_CYCLING_GENES		388	0.6068311	2.2092395	0.0	0.0	0.0	1294	tags=38%, list=17%, signal=43%
CHICAS_RB1_TARGETS_GROWING	CHICAS_RB1_TARGETS_GROWING		156	0.6265031	2.2010293	0.0	0.0	0.0	903	tags=42%, list=12%, signal=46%
BIDUS_METASTASIS_UP	BIDUS_METASTASIS_UP		144	0.6265022	2.1957228	0.0	0.0	0.0	1174	tags=36%, list=16%, signal=42%
REACTOME_DNA_STRAND_ELONGATION	REACTOME_DNA_STRAND_ELONGATION		22	0.82582587	2.1856523	0.0	0.0	0.0	718	tags=77%, list=10%, signal=85%
PID_FOXM1PATHWAY	PID_FOXM1PATHWAY		28	0.7894758	2.1789672	0.0	0.0	0.0	591	tags=50%, list=8%, signal=54%
POOLA_INVASIVE_BREAST_CANCER_UP	POOLA_INVASIVE_BREAST_CANCER_UP		172	0.6213006	2.1787856	0.0	0.0	0.0	582	tags=29%, list=8%, signal=31%
BOYAULT_LIVER_CANCER_SUBCLASS_G23_UP	BOYAULT_LIVER_CANCER_SUBCLASS_G23_UP		45	0.71359813	2.1649141	0.0	0.0	0.0	480	tags=36%, list=6%, signal=38%
REACTOME_MITOTIC_M_M_G1_PHASES	REACTOME_MITOTIC_M_M_G1_PHASES		116	0.64096063	2.1617067	0.0	0.0	0.0	777	tags=32%, list=10%, signal=35%
PYEON_HPV_POSITIVE_TUMORS_UP	PYEON_HPV_POSITIVE_TUMORS_UP		40	0.7303379	2.1594465	0.0	0.0	0.0	552	tags=38%, list=7%, signal=40%
MANALO_HYPOXIA_DN	MANALO_HYPOXIA_DN		209	0.6024713	2.1582677	0.0	0.0	0.0	1613	tags=49%, list=22%, signal=61%
PID_AURORA_A_PATHWAY	PID_AURORA_A_PATHWAY		26	0.7890449	2.157315	0.0	0.0	0.0	188	tags=35%, list=3%, signal=35%
WONG_EMBRYONIC_STEM_CELL_CORE	WONG_EMBRYONIC_STEM_CELL_CORE		254	0.5993265	2.1564326	0.0	0.0	0.0	1232	tags=34%, list=17%, signal=40%
KEGG_DNA_REPLICATION	KEGG_DNA_REPLICATION		27	0.7878712	2.1548274	0.0	0.0	0.0	1013	tags=74%, list=14%, signal=85%
GOLDRATH_ANTIGEN_RESPONSE	GOLDRATH_ANTIGEN_RESPONSE		228	0.5991097	2.1540625	0.0	0.0	0.0	694	tags=27%, list=9%, signal=29%
CAIRO_HEPATOBLASTOMA_CLASSES_UP	CAIRO_HEPATOBLASTOMA_CLASSES_UP		482	0.58506024	2.1519983	0.0	0.0	0.0	1454	tags=38%, list=20%, signal=44%
PID_AURORA_B_PATHWAY	PID_AURORA_B_PATHWAY		25	0.8070066	2.1458204	0.0	0.0	0.0	636	tags=44%, list=9%, signal=48%
ZHENG_GLIOBLASTOMA_PLASTICITY_UP	ZHENG_GLIOBLASTOMA_PLASTICITY_UP		142	0.6230841	2.1452687	0.0	0.0	0.0	263	tags=26%, list=4%, signal=26%
STEIN_ESRRA_TARGETS_RESPONSIVE_TO_ESTROGEN_DN	STEIN_ESRRA_TARGETS_RESPONSIVE_TO_ESTROGEN_DN		28	0.7715323	2.1394012	0.0	0.0	0.0	975	tags=64%, list=13%, signal=74%
REACTOME_MITOTIC_PROMETAPHASE	REACTOME_MITOTIC_PROMETAPHASE		56	0.6938986	2.137234	0.0	0.0	0.0	426	tags=32%, list=6%, signal=34%
CROONQUIST_NRAS_VS_STROMAL_STIMULATION_DN	CROONQUIST_NRAS_VS_STROMAL_STIMULATION_DN		77	0.656648	2.1369407	0.0	0.0	0.0	781	tags=38%, list=11%, signal=42%
SENGUPTA_NASOPHARYNGEAL_CARCINOMA_UP	SENGUPTA_NASOPHARYNGEAL_CARCINOMA_UP		155	0.6175734	2.1362894	0.0	0.0	0.0	903	tags=34%, list=12%, signal=38%
SU_TESTIS	SU_TESTIS		30	0.7638869	2.1355553	0.0	0.0	0.0	684	tags=57%, list=9%, signal=62%
WILCOX_PRESPONSE_TO_ROGESTERONE_UP	WILCOX_PRESPONSE_TO_ROGESTERONE_UP		90	0.64705336	2.131561	0.0	7.526686E-6	0.0010	373	tags=27%, list=5%, signal=28%
PETROVA_ENDOTHELIUM_LYMPHATIC_VS_BLOOD_UP	PETROVA_ENDOTHELIUM_LYMPHATIC_VS_BLOOD_UP		94	0.64253193	2.129678	0.0	7.460078E-6	0.0010	894	tags=35%, list=12%, signal=39%
AFFAR_YY1_TARGETS_DN	AFFAR_YY1_TARGETS_DN		128	0.6204287	2.1275158	0.0	7.3946385E-6	0.0010	718	tags=30%, list=10%, signal=33%
MORI_MATURE_B_LYMPHOCYTE_DN	MORI_MATURE_B_LYMPHOCYTE_DN		52	0.6824647	2.1247551	0.0	7.3303377E-6	0.0010	650	tags=35%, list=9%, signal=38%
DELPUECH_FOXO3_TARGETS_DN	DELPUECH_FOXO3_TARGETS_DN		33	0.747044	2.1214936	0.0	7.267145E-6	0.0010	534	tags=39%, list=7%, signal=42%
GARGALOVIC_RESPONSE_TO_OXIDIZED_PHOSPHOLIPIDS_TURQUOISE_DN	GARGALOVIC_RESPONSE_TO_OXIDIZED_PHOSPHOLIPIDS_TURQUOISE_DN		36	0.7419693	2.1205745	0.0	7.2050325E-6	0.0010	952	tags=50%, list=13%, signal=57%
OLSSON_E2F3_TARGETS_DN	OLSSON_E2F3_TARGETS_DN		34	0.72670317	2.1071877	0.0	7.143973E-6	0.0010	308	tags=41%, list=4%, signal=43%
BERENJENO_TRANSFORMED_BY_RHOA_UP	BERENJENO_TRANSFORMED_BY_RHOA_UP		367	0.5791699	2.1062393	0.0	7.0839396E-6	0.0010	1013	tags=31%, list=14%, signal=34%
LOPEZ_MESOTELIOMA_SURVIVAL_TIME_UP	LOPEZ_MESOTELIOMA_SURVIVAL_TIME_UP		13	0.88649875	2.105124	0.0	7.0249066E-6	0.0010	141	tags=54%, list=2%, signal=55%
KORKOLA_TERATOMA	KORKOLA_TERATOMA		26	0.77070844	2.095538	0.0	1.3888134E-5	0.0020	790	tags=54%, list=11%, signal=60%
NADERI_BREAST_CANCER_PROGNOSIS_UP	NADERI_BREAST_CANCER_PROGNOSIS_UP		31	0.73741066	2.0943615	0.0	1.3774297E-5	0.0020	609	tags=58%, list=8%, signal=63%
FOURNIER_ACINAR_DEVELOPMENT_LATE_2	FOURNIER_ACINAR_DEVELOPMENT_LATE_2		221	0.58286107	2.0924363	0.0	2.0453288E-5	0.0030	1848	tags=49%, list=25%, signal=64%
SASAKI_ADULT_T_CELL_LEUKEMIA	SASAKI_ADULT_T_CELL_LEUKEMIA		132	0.60254246	2.088971	0.0	2.0288342E-5	0.0030	455	tags=22%, list=6%, signal=23%
WANG_CISPLATIN_RESPONSE_AND_XPC_UP	WANG_CISPLATIN_RESPONSE_AND_XPC_UP		129	0.6050138	2.085408	0.0	2.6946278E-5	0.0040	581	tags=29%, list=8%, signal=31%
LIANG_SILENCED_BY_METHYLATION_DN	LIANG_SILENCED_BY_METHYLATION_DN		10	0.94011503	2.0841565	0.0	2.6732418E-5	0.0040	422	tags=90%, list=6%, signal=95%
WEST_ADRENOCORTICAL_TUMOR_UP	WEST_ADRENOCORTICAL_TUMOR_UP		242	0.5801707	2.0820699	0.0	3.3116223E-5	0.0050	688	tags=23%, list=9%, signal=24%
TOYOTA_TARGETS_OF_MIR34B_AND_MIR34C	TOYOTA_TARGETS_OF_MIR34B_AND_MIR34C		216	0.57958734	2.0725632	0.0	3.28575E-5	0.0050	1861	tags=47%, list=25%, signal=61%
REACTOME_KINESINS	REACTOME_KINESINS		14	0.8703487	2.070599	0.0	3.260279E-5	0.0050	215	tags=50%, list=3%, signal=51%
CONCANNON_APOPTOSIS_BY_EPOXOMICIN_DN	CONCANNON_APOPTOSIS_BY_EPOXOMICIN_DN		132	0.6044324	2.0681522	0.0	3.2352E-5	0.0050	918	tags=31%, list=12%, signal=35%
PUJANA_BREAST_CANCER_LIT_INT_NETWORK	PUJANA_BREAST_CANCER_LIT_INT_NETWORK		70	0.6430762	2.0648944	0.0	3.210504E-5	0.0050	885	tags=43%, list=12%, signal=48%
PRAMOONJAGO_SOX4_TARGETS_DN	PRAMOONJAGO_SOX4_TARGETS_DN		42	0.69032496	2.0582564	0.0	3.822505E-5	0.0060	1113	tags=36%, list=15%, signal=42%
KEGG_CELL_CYCLE	KEGG_CELL_CYCLE		80	0.6324772	2.0566077	0.0	3.7937647E-5	0.0060	1609	tags=49%, list=22%, signal=62%
PETROVA_PROX1_TARGETS_UP	PETROVA_PROX1_TARGETS_UP		21	0.7878473	2.0506341	0.0	4.3896187E-5	0.0070	718	tags=52%, list=10%, signal=58%
SMID_BREAST_CANCER_LUMINAL_A_DN	SMID_BREAST_CANCER_LUMINAL_A_DN		11	0.896001	2.0448303	0.0	4.3571028E-5	0.0070	568	tags=64%, list=8%, signal=69%
WHITFIELD_CELL_CYCLE_S	WHITFIELD_CELL_CYCLE_S		73	0.63701826	2.043556	0.0	4.3250653E-5	0.0070	1126	tags=41%, list=15%, signal=48%
REACTOME_FACTORS_INVOLVED_IN_MEGAKARYOCYTE_DEVELOPMENT_AND_PLATELET_PRODUCTION	REACTOME_FACTORS_INVOLVED_IN_MEGAKARYOCYTE_DEVELOPMENT_AND_PLATELET_PRODUCTION		60	0.64691216	2.0435057	0.0	4.2934957E-5	0.0070	636	tags=28%, list=9%, signal=31%
REACTOME_S_PHASE	REACTOME_S_PHASE		83	0.61608404	2.0396216	0.0	4.2623833E-5	0.0070	755	tags=31%, list=10%, signal=34%
REACTOME_G2_M_CHECKPOINTS	REACTOME_G2_M_CHECKPOINTS		22	0.77702487	2.0356562	0.0	4.8361955E-5	0.0080	1185	tags=77%, list=16%, signal=92%
FEVR_CTNNB1_TARGETS_DN	FEVR_CTNNB1_TARGETS_DN		338	0.55983835	2.0353036	0.0	4.801651E-5	0.0080	1650	tags=41%, list=22%, signal=50%
REACTOME_ACTIVATION_OF_ATR_IN_RESPONSE_TO_REPLICATION_STRESS	REACTOME_ACTIVATION_OF_ATR_IN_RESPONSE_TO_REPLICATION_STRESS		18	0.7932505	2.0351489	0.0	4.767597E-5	0.0080	1013	tags=78%, list=14%, signal=90%
REACTOME_CELL_CYCLE_CHECKPOINTS	REACTOME_CELL_CYCLE_CHECKPOINTS		78	0.61903965	2.0301774	0.0	5.3259228E-5	0.0090	1229	tags=36%, list=17%, signal=43%
NAKAMURA_CANCER_MICROENVIRONMENT_DN	NAKAMURA_CANCER_MICROENVIRONMENT_DN		30	0.72320575	2.029852	0.0	5.2886786E-5	0.0090	160	tags=30%, list=2%, signal=31%
REACTOME_TELOMERE_MAINTENANCE	REACTOME_TELOMERE_MAINTENANCE		33	0.71449023	2.0274017	0.0	5.8400707E-5	0.01	822	tags=55%, list=11%, signal=61%
LINDGREN_BLADDER_CANCER_CLUSTER_1_DN	LINDGREN_BLADDER_CANCER_CLUSTER_1_DN		229	0.56708145	2.0272958	0.0	5.7997942E-5	0.01	1428	tags=38%, list=19%, signal=45%
WHITFIELD_CELL_CYCLE_G2	WHITFIELD_CELL_CYCLE_G2		95	0.60597605	2.0268476	0.0	5.7600697E-5	0.01	703	tags=31%, list=9%, signal=33%
LY_AGING_PREMATURE_DN	LY_AGING_PREMATURE_DN		26	0.74354374	2.0231137	0.0	5.7208857E-5	0.01	500	tags=46%, list=7%, signal=49%
BENPORATH_ES_1	BENPORATH_ES_1		228	0.5653436	2.0210397	0.0	6.248834E-5	0.011	1743	tags=46%, list=23%, signal=58%
REACTOME_REGULATION_OF_MITOTIC_CELL_CYCLE	REACTOME_REGULATION_OF_MITOTIC_CELL_CYCLE		61	0.63405675	2.0178018	0.0	6.206895E-5	0.011	372	tags=20%, list=5%, signal=21%
WEST_ADRENOCORTICAL_TUMOR_MARKERS_UP	WEST_ADRENOCORTICAL_TUMOR_MARKERS_UP		18	0.7939259	2.0136402	0.0	8.4093E-5	0.015	222	tags=50%, list=3%, signal=51%
REACTOME_MEIOSIS	REACTOME_MEIOSIS		40	0.68659645	2.0077467	0.0	9.47755E-5	0.017	777	tags=48%, list=10%, signal=53%
SCIBETTA_KDM5B_TARGETS_DN	SCIBETTA_KDM5B_TARGETS_DN		60	0.6389526	2.0060563	0.0	9.97126E-5	0.018	311	tags=20%, list=4%, signal=21%
REACTOME_CYCLIN_A_B1_ASSOCIATED_EVENTS_DURING_G2_M_TRANSITION	REACTOME_CYCLIN_A_B1_ASSOCIATED_EVENTS_DURING_G2_M_TRANSITION		11	0.8885402	1.9990956	0.0	1.1555967E-4	0.021	117	tags=55%, list=2%, signal=55%
REACTOME_DEPOSITION_OF_NEW_CENPA_CONTAINING_NUCLEOSOMES_AT_THE_CENTROMERE	REACTOME_DEPOSITION_OF_NEW_CENPA_CONTAINING_NUCLEOSOMES_AT_THE_CENTROMERE		17	0.8089855	1.9989872	0.0	1.1480928E-4	0.021	727	tags=65%, list=10%, signal=72%
WANG_RESPONSE_TO_GSK3_INHIBITOR_SB216763_DN	WANG_RESPONSE_TO_GSK3_INHIBITOR_SB216763_DN		192	0.56322664	1.9971018	0.0	1.3037243E-4	0.024	1530	tags=41%, list=21%, signal=50%
SMIRNOV_RESPONSE_TO_IR_6HR_DN	SMIRNOV_RESPONSE_TO_IR_6HR_DN		79	0.6054465	1.9890367	0.0	1.7275424E-4	0.031	526	tags=27%, list=7%, signal=28%
KAUFFMANN_DNA_REPLICATION_GENES	KAUFFMANN_DNA_REPLICATION_GENES		89	0.5982322	1.9862702	0.0	1.7701443E-4	0.032	1260	tags=46%, list=17%, signal=55%
BENPORATH_ES_CORE_NINE_CORRELATED	BENPORATH_ES_CORE_NINE_CORRELATED		68	0.6139924	1.9834484	0.0	1.8117898E-4	0.033	1769	tags=56%, list=24%, signal=73%
SERVITJA_LIVER_HNF1A_TARGETS_UP	SERVITJA_LIVER_HNF1A_TARGETS_UP		77	0.6106724	1.9831233	0.0	1.8529288E-4	0.034	311	tags=25%, list=4%, signal=25%
REACTOME_SYNTHESIS_OF_DNA	REACTOME_SYNTHESIS_OF_DNA		69	0.6177795	1.9779509	0.0	1.9986014E-4	0.037	1090	tags=36%, list=15%, signal=42%
MUELLER_PLURINET	MUELLER_PLURINET		202	0.55698055	1.9718686	0.0	2.3004257E-4	0.043	1641	tags=42%, list=22%, signal=53%
REACTOME_EXTENSION_OF_TELOMERES	REACTOME_EXTENSION_OF_TELOMERES		19	0.7563171	1.9685645	0.0	2.5971464E-4	0.049	1013	tags=74%, list=14%, signal=85%
TURASHVILI_BREAST_DUCTAL_CARCINOMA_VS_LOBULAR_NORMAL_UP	TURASHVILI_BREAST_DUCTAL_CARCINOMA_VS_LOBULAR_NORMAL_UP		38	0.6660475	1.9655578	0.0	2.7873475E-4	0.053	1212	tags=45%, list=16%, signal=53%
CUI_TCF21_TARGETS_2_UP	CUI_TCF21_TARGETS_2_UP		220	0.55008894	1.9574136	0.0	3.5871682E-4	0.068	903	tags=29%, list=12%, signal=32%
YANG_BCL3_TARGETS_UP	YANG_BCL3_TARGETS_UP		170	0.55796087	1.9573966	0.0	3.565428E-4	0.068	1020	tags=31%, list=14%, signal=35%
KALMA_E2F1_TARGETS	KALMA_E2F1_TARGETS		11	0.8725242	1.9520389	0.0	4.0505908E-4	0.078	718	tags=82%, list=10%, signal=90%
RIZ_ERYTHROID_DIFFERENTIATION	RIZ_ERYTHROID_DIFFERENTIATION		59	0.6244604	1.9517622	0.0	4.0263357E-4	0.078	1036	tags=39%, list=14%, signal=45%
REACTOME_MEIOTIC_SYNAPSIS	REACTOME_MEIOTIC_SYNAPSIS		28	0.7155019	1.9451592	0.0	4.905462E-4	0.096	777	tags=46%, list=10%, signal=52%
RIGGI_EWING_SARCOMA_PROGENITOR_DN	RIGGI_EWING_SARCOMA_PROGENITOR_DN		88	0.5906817	1.9429791	0.0	5.074603E-4	0.1	642	tags=30%, list=9%, signal=32%
VERNELL_RETINOBLASTOMA_PATHWAY_UP	VERNELL_RETINOBLASTOMA_PATHWAY_UP		47	0.64226687	1.9428586	0.0	5.044752E-4	0.1	1123	tags=53%, list=15%, signal=62%
PID_E2F_PATHWAY	PID_E2F_PATHWAY		49	0.6424991	1.940906	0.0	5.3595233E-4	0.106	1591	tags=57%, list=21%, signal=72%
FINETTI_BREAST_CANCER_KINOME_RED	FINETTI_BREAST_CANCER_KINOME_RED		10	0.87951183	1.9319623	0.0	6.7933847E-4	0.134	188	tags=70%, list=3%, signal=72%
KEGG_CYTOSOLIC_DNA_SENSING_PATHWAY	KEGG_CYTOSOLIC_DNA_SENSING_PATHWAY		16	0.76594245	1.9313279	0.0	6.754116E-4	0.134	637	tags=44%, list=9%, signal=48%
REACTOME_LAGGING_STRAND_SYNTHESIS	REACTOME_LAGGING_STRAND_SYNTHESIS		14	0.80536383	1.9303591	0.0	6.8597926E-4	0.137	694	tags=71%, list=9%, signal=79%
HONRADO_BREAST_CANCER_BRCA1_VS_BRCA2	HONRADO_BREAST_CANCER_BRCA1_VS_BRCA2		14	0.8011163	1.9299791	0.0	6.9172704E-4	0.138	522	tags=50%, list=7%, signal=54%
RODRIGUES_THYROID_CARCINOMA_POORLY_DIFFERENTIATED_UP	RODRIGUES_THYROID_CARCINOMA_POORLY_DIFFERENTIATED_UP		363	0.52999985	1.926247	0.0	7.4042985E-4	0.147	927	tags=26%, list=12%, signal=28%
REACTOME_APC_CDC20_MEDIATED_DEGRADATION_OF_NEK2A	REACTOME_APC_CDC20_MEDIATED_DEGRADATION_OF_NEK2A		13	0.8179765	1.9242533	0.0013550136	7.504816E-4	0.148	75	tags=38%, list=1%, signal=39%
RICKMAN_TUMOR_DIFFERENTIATED_WELL_VS_POORLY_UP	RICKMAN_TUMOR_DIFFERENTIATED_WELL_VS_POORLY_UP		134	0.5561172	1.9212656	0.0	8.1236416E-4	0.159	1337	tags=37%, list=18%, signal=44%
ARACNE_BIRC5-NETWORK	ARACNE_BIRC5-NETWORK		34	0.6644873	1.9212283	0.0	8.0782577E-4	0.159	1016	tags=44%, list=14%, signal=51%
REACTOME_ACTIVATION_OF_THE_PRE_REPLICATIVE_COMPLEX	REACTOME_ACTIVATION_OF_THE_PRE_REPLICATIVE_COMPLEX		14	0.7982	1.9206216	0.0	8.172856E-4	0.161	1003	tags=79%, list=13%, signal=91%
REACTOME_E2F_MEDIATED_REGULATION_OF_DNA_REPLICATION	REACTOME_E2F_MEDIATED_REGULATION_OF_DNA_REPLICATION		19	0.75146616	1.9196731	0.0	8.2209735E-4	0.163	719	tags=53%, list=10%, signal=58%
REACTOME_MEIOTIC_RECOMBINATION	REACTOME_MEIOTIC_RECOMBINATION		21	0.73734504	1.9191674	0.0	8.5444585E-4	0.17	557	tags=57%, list=7%, signal=62%
ZHANG_BREAST_CANCER_PROGENITORS_UP	ZHANG_BREAST_CANCER_PROGENITORS_UP		238	0.5336827	1.9154507	0.0	8.910225E-4	0.177	1556	tags=37%, list=21%, signal=45%
XU_HGF_TARGETS_INDUCED_BY_AKT1_48HR_DN	XU_HGF_TARGETS_INDUCED_BY_AKT1_48HR_DN		16	0.77113116	1.9152552	0.0013850415	8.8618003E-4	0.177	311	tags=38%, list=4%, signal=39%
CAFFAREL_RESPONSE_TO_THC_DN	CAFFAREL_RESPONSE_TO_THC_DN		23	0.71565986	1.9062704	0.0	0.0010361313	0.204	722	tags=39%, list=10%, signal=43%
GAL_LEUKEMIC_STEM_CELL_DN	GAL_LEUKEMIC_STEM_CELL_DN		118	0.55607	1.9029394	0.0	0.0010937613	0.213	482	tags=26%, list=6%, signal=28%
STEIN_ESR1_TARGETS	STEIN_ESR1_TARGETS		61	0.59789836	1.898476	0.0	0.001191237	0.233	829	tags=34%, list=11%, signal=38%
KAUFFMANN_DNA_REPAIR_GENES	KAUFFMANN_DNA_REPAIR_GENES		137	0.5537745	1.8961847	0.0	0.001260853	0.247	1351	tags=38%, list=18%, signal=46%
COLINA_TARGETS_OF_4EBP1_AND_4EBP2	COLINA_TARGETS_OF_4EBP1_AND_4EBP2		217	0.5292958	1.8955108	0.0	0.0012585472	0.248	978	tags=24%, list=13%, signal=27%
BHATI_G2M_ARREST_BY_2METHOXYESTRADIOL_UP	BHATI_G2M_ARREST_BY_2METHOXYESTRADIOL_UP		66	0.60193825	1.894844	0.0	0.0012829107	0.252	1033	tags=30%, list=14%, signal=35%
SIMBULAN_PARP1_TARGETS_DN	SIMBULAN_PARP1_TARGETS_DN		15	0.789102	1.8894206	0.0013315579	0.0014083673	0.273	694	tags=53%, list=9%, signal=59%
JEON_SMAD6_TARGETS_DN	JEON_SMAD6_TARGETS_DN		13	0.80311096	1.8865818	0.0	0.001492927	0.287	566	tags=54%, list=8%, signal=58%
REACTOME_G1_S_SPECIFIC_TRANSCRIPTION	REACTOME_G1_S_SPECIFIC_TRANSCRIPTION		11	0.84184325	1.8823396	0.0	0.001585159	0.304	277	tags=64%, list=4%, signal=66%
REACTOME_INTERACTIONS_OF_VPR_WITH_HOST_CELLULAR_PROTEINS	REACTOME_INTERACTIONS_OF_VPR_WITH_HOST_CELLULAR_PROTEINS		30	0.6729884	1.882087	0.0	0.0015856134	0.305	1771	tags=63%, list=24%, signal=83%
CHIARETTI_T_ALL_RELAPSE_PROGNOSIS	CHIARETTI_T_ALL_RELAPSE_PROGNOSIS		16	0.75890213	1.8817321	0.0	0.0015860306	0.306	1388	tags=63%, list=19%, signal=77%
TARTE_PLASMA_CELL_VS_PLASMABLAST_DN	TARTE_PLASMA_CELL_VS_PLASMABLAST_DN		257	0.52208924	1.8810679	0.0	0.0016036544	0.309	897	tags=23%, list=12%, signal=25%
REACTOME_G1_S_TRANSITION	REACTOME_G1_S_TRANSITION		83	0.5728767	1.8785447	0.0	0.0016852043	0.324	755	tags=27%, list=10%, signal=29%
JOHNSTONE_PARVB_TARGETS_3_DN	JOHNSTONE_PARVB_TARGETS_3_DN		483	0.5058623	1.8713881	0.0	0.0019272091	0.366	1879	tags=39%, list=25%, signal=49%
PID_ATM_PATHWAY	PID_ATM_PATHWAY		26	0.68549	1.8707483	0.0012987013	0.0019555562	0.372	1185	tags=58%, list=16%, signal=68%
ALCALAY_AML_BY_NPM1_LOCALIZATION_DN	ALCALAY_AML_BY_NPM1_LOCALIZATION_DN		129	0.54960215	1.8703284	0.0	0.0019626496	0.375	500	tags=24%, list=7%, signal=25%
REACTOME_PROCESSIVE_SYNTHESIS_ON_THE_LAGGING_STRAND	REACTOME_PROCESSIVE_SYNTHESIS_ON_THE_LAGGING_STRAND		11	0.8300805	1.8693804	0.0013927576	0.0019821848	0.38	694	tags=73%, list=9%, signal=80%
VANTVEER_BREAST_CANCER_POOR_PROGNOSIS	VANTVEER_BREAST_CANCER_POOR_PROGNOSIS		31	0.6593627	1.8668866	0.0	0.0020596543	0.393	718	tags=32%, list=10%, signal=36%
KIM_WT1_TARGETS_DN	KIM_WT1_TARGETS_DN		314	0.5117742	1.862571	0.0	0.002252545	0.422	1264	tags=30%, list=17%, signal=34%
MIPS_CEN_COMPLEX	MIPS_CEN_COMPLEX		19	0.729325	1.8516604	0.0013157895	0.002748372	0.49	854	tags=47%, list=11%, signal=53%
BHATTACHARYA_EMBRYONIC_STEM_CELL	BHATTACHARYA_EMBRYONIC_STEM_CELL		55	0.59763986	1.8511641	0.0	0.002751375	0.491	1739	tags=44%, list=23%, signal=57%
KEGG_MISMATCH_REPAIR	KEGG_MISMATCH_REPAIR		18	0.708309	1.8471565	0.0013245033	0.0029378647	0.513	1013	tags=56%, list=14%, signal=64%
REACTOME_METABOLISM_OF_NON_CODING_RNA	REACTOME_METABOLISM_OF_NON_CODING_RNA		37	0.6302642	1.8461983	0.0	0.002960401	0.52	2377	tags=78%, list=32%, signal=115%
WILLIAMS_ESR1_TARGETS_UP	WILLIAMS_ESR1_TARGETS_UP		17	0.73422325	1.8453469	0.0	0.0029784506	0.52	289	tags=29%, list=4%, signal=31%
REACTOME_INHIBITION_OF_THE_PROTEOLYTIC_ACTIVITY_OF_APC_C_REQUIRED_FOR_THE_ONSET_OF_ANAPHASE_BY_MITOTIC_SPINDLE_CHECKPOINT_COMPONENTS	REACTOME_INHIBITION_OF_THE_PROTEOLYTIC_ACTIVITY_OF_APC_C_REQUIRED_FOR_THE_ONSET_OF_ANAPHASE_BY_MITOTIC_SPINDLE_CHECKPOINT_COMPONENTS		11	0.8108512	1.8439631	0.0014084507	0.00303664	0.527	75	tags=36%, list=1%, signal=37%
REACTOME_GLUCOSE_TRANSPORT	REACTOME_GLUCOSE_TRANSPORT		30	0.64996827	1.8429323	0.0012642225	0.0031222254	0.537	1771	tags=63%, list=24%, signal=83%
BOYAULT_LIVER_CANCER_SUBCLASS_G123_UP	BOYAULT_LIVER_CANCER_SUBCLASS_G123_UP		39	0.61695576	1.8411382	0.0	0.0031791057	0.547	455	tags=26%, list=6%, signal=27%
BOHN_PRIMARY_IMMUNODEFICIENCY_SYNDROM_UP	BOHN_PRIMARY_IMMUNODEFICIENCY_SYNDROM_UP		36	0.64441985	1.8402729	0.0	0.003227744	0.557	534	tags=22%, list=7%, signal=24%
REACTOME_REGULATION_OF_GLUCOKINASE_BY_GLUCOKINASE_REGULATORY_PROTEIN	REACTOME_REGULATION_OF_GLUCOKINASE_BY_GLUCOKINASE_REGULATORY_PROTEIN		23	0.6919322	1.8357106	0.0	0.003496425	0.583	1771	tags=74%, list=24%, signal=97%
REACTOME_REPAIR_SYNTHESIS_FOR_GAP_FILLING_BY_DNA_POL_IN_TC_NER	REACTOME_REPAIR_SYNTHESIS_FOR_GAP_FILLING_BY_DNA_POL_IN_TC_NER		11	0.81263185	1.8350383	0.0	0.0035587281	0.589	1013	tags=82%, list=14%, signal=95%
PYEON_CANCER_HEAD_AND_NECK_VS_CERVICAL_UP	PYEON_CANCER_HEAD_AND_NECK_VS_CERVICAL_UP		87	0.5528996	1.8302357	0.0	0.0038825946	0.619	1164	tags=31%, list=16%, signal=36%
MEINHOLD_OVARIAN_CANCER_LOW_GRADE_DN	MEINHOLD_OVARIAN_CANCER_LOW_GRADE_DN		19	0.71757567	1.826669	0.0	0.004126133	0.641	964	tags=32%, list=13%, signal=36%
FERRANDO_HOX11_NEIGHBORS	FERRANDO_HOX11_NEIGHBORS		14	0.76347536	1.8253284	0.0	0.0042155646	0.65	367	tags=43%, list=5%, signal=45%
REACTOME_TRANSPORT_OF_MATURE_MRNA_DERIVED_FROM_AN_INTRONLESS_TRANSCRIPT	REACTOME_TRANSPORT_OF_MATURE_MRNA_DERIVED_FROM_AN_INTRONLESS_TRANSCRIPT		27	0.6645775	1.8248087	0.0012836971	0.004227319	0.65	1771	tags=70%, list=24%, signal=92%
REACTOME_MITOTIC_G2_G2_M_PHASES	REACTOME_MITOTIC_G2_G2_M_PHASES		52	0.5917098	1.8237141	0.0	0.0042808745	0.655	719	tags=27%, list=10%, signal=30%
REACTOME_MITOTIC_G1_G1_S_PHASES	REACTOME_MITOTIC_G1_G1_S_PHASES		96	0.5461196	1.8216032	0.0	0.004433207	0.674	755	tags=25%, list=10%, signal=27%
LIANG_HEMATOPOIESIS_STEM_CELL_NUMBER_LARGE_VS_TINY_UP	LIANG_HEMATOPOIESIS_STEM_CELL_NUMBER_LARGE_VS_TINY_UP		24	0.68973947	1.8180339	0.0	0.0047746697	0.712	467	tags=29%, list=6%, signal=31%
SLEBOS_HEAD_AND_NECK_CANCER_WITH_HPV_UP	SLEBOS_HEAD_AND_NECK_CANCER_WITH_HPV_UP		40	0.6153668	1.8176614	0.0	0.0047872863	0.715	1164	tags=38%, list=16%, signal=44%
SANSOM_APC_TARGETS_REQUIRE_MYC	SANSOM_APC_TARGETS_REQUIRE_MYC		102	0.53718203	1.8175136	0.0	0.004765819	0.715	1536	tags=40%, list=21%, signal=50%
BIOCARTA_G2_PATHWAY	BIOCARTA_G2_PATHWAY		17	0.7264512	1.8115602	0.0	0.005194761	0.746	890	tags=53%, list=12%, signal=60%
AUNG_GASTRIC_CANCER	AUNG_GASTRIC_CANCER		24	0.67222685	1.8090702	0.0	0.0053918604	0.766	949	tags=29%, list=13%, signal=33%
MOREAUX_MULTIPLE_MYELOMA_BY_TACI_DN	MOREAUX_MULTIPLE_MYELOMA_BY_TACI_DN		102	0.5365653	1.8075536	0.0	0.0055133738	0.774	2403	tags=56%, list=32%, signal=81%
BOYLAN_MULTIPLE_MYELOMA_C_CLUSTER_UP	BOYLAN_MULTIPLE_MYELOMA_C_CLUSTER_UP		19	0.7064611	1.8054456	0.0013605442	0.0056557953	0.785	457	tags=32%, list=6%, signal=34%
REACTOME_RNA_POL_III_TRANSCRIPTION_TERMINATION	REACTOME_RNA_POL_III_TRANSCRIPTION_TERMINATION		15	0.73190314	1.8053352	0.0	0.005642098	0.786	637	tags=40%, list=9%, signal=44%
LI_WILMS_TUMOR_ANAPLASTIC_UP	LI_WILMS_TUMOR_ANAPLASTIC_UP		12	0.7817725	1.8011078	0.0	0.0060617696	0.807	455	tags=50%, list=6%, signal=53%
ABRAMSON_INTERACT_WITH_AIRE	ABRAMSON_INTERACT_WITH_AIRE		33	0.6294416	1.7994772	0.0012391574	0.006192562	0.815	1116	tags=48%, list=15%, signal=57%
REACTOME_TRANSPORT_OF_RIBONUCLEOPROTEINS_INTO_THE_HOST_NUCLEUS	REACTOME_TRANSPORT_OF_RIBONUCLEOPROTEINS_INTO_THE_HOST_NUCLEUS		25	0.67204714	1.797005	0.0012626263	0.0064058173	0.828	1771	tags=72%, list=24%, signal=94%
CAFFAREL_RESPONSE_TO_THC_24HR_5_DN	CAFFAREL_RESPONSE_TO_THC_24HR_5_DN		37	0.61100787	1.7917533	0.0	0.0069578243	0.856	220	tags=16%, list=3%, signal=17%
PATIL_LIVER_CANCER	PATIL_LIVER_CANCER		444	0.48767847	1.7903371	0.0	0.0070973462	0.862	1556	tags=31%, list=21%, signal=37%
DASU_IL6_SIGNALING_SCAR_UP	DASU_IL6_SIGNALING_SCAR_UP		21	0.6887442	1.7900467	0.0	0.0071281656	0.865	425	tags=24%, list=6%, signal=25%
ELVIDGE_HYPOXIA_BY_DMOG_DN	ELVIDGE_HYPOXIA_BY_DMOG_DN		40	0.6067094	1.7891493	0.0	0.007212312	0.867	670	tags=30%, list=9%, signal=33%
BOYAULT_LIVER_CANCER_SUBCLASS_G3_UP	BOYAULT_LIVER_CANCER_SUBCLASS_G3_UP		153	0.51626384	1.7861426	0.0	0.007552201	0.879	2349	tags=44%, list=32%, signal=63%
LE_NEURONAL_DIFFERENTIATION_DN	LE_NEURONAL_DIFFERENTIATION_DN		13	0.7677181	1.7834346	0.0013297872	0.007832308	0.887	604	tags=54%, list=8%, signal=59%
JAEGER_METASTASIS_UP	JAEGER_METASTASIS_UP		35	0.628054	1.7808533	0.0	0.008173551	0.895	664	tags=34%, list=9%, signal=37%
PAL_PRMT5_TARGETS_UP	PAL_PRMT5_TARGETS_UP		149	0.5078976	1.7796946	0.0	0.008245098	0.895	621	tags=22%, list=8%, signal=24%
TURASHVILI_BREAST_DUCTAL_CARCINOMA_VS_DUCTAL_NORMAL_UP	TURASHVILI_BREAST_DUCTAL_CARCINOMA_VS_DUCTAL_NORMAL_UP		25	0.652991	1.7766973	0.0	0.008652129	0.907	2010	tags=72%, list=27%, signal=98%
MIPS_RC_COMPLEX_DURING_S_PHASE_OF_CELL_CYCLE	MIPS_RC_COMPLEX_DURING_S_PHASE_OF_CELL_CYCLE		10	0.79311115	1.7746459	0.0071530757	0.008937287	0.911	671	tags=60%, list=9%, signal=66%
KEGG_PROGESTERONE_MEDIATED_OOCYTE_MATURATION	KEGG_PROGESTERONE_MEDIATED_OOCYTE_MATURATION		45	0.58738565	1.774299	0.0	0.008952365	0.911	427	tags=20%, list=6%, signal=21%
PID_FANCONI_PATHWAY	PID_FANCONI_PATHWAY		28	0.65160966	1.773897	0.0012376237	0.008963876	0.912	1185	tags=57%, list=16%, signal=68%
KEGG_OOCYTE_MEIOSIS	KEGG_OOCYTE_MEIOSIS		61	0.5595488	1.7713557	0.0	0.009344057	0.92	154	tags=16%, list=2%, signal=17%
MORI_EMU_MYC_LYMPHOMA_BY_ONSET_TIME_UP	MORI_EMU_MYC_LYMPHOMA_BY_ONSET_TIME_UP		59	0.5629894	1.7698144	0.0	0.0095494855	0.924	1546	tags=39%, list=21%, signal=49%
REACTOME_TRANSPORT_OF_MATURE_TRANSCRIPT_TO_CYTOPLASM	REACTOME_TRANSPORT_OF_MATURE_TRANSCRIPT_TO_CYTOPLASM		36	0.6136476	1.769561	0.0012210013	0.009544864	0.925	2517	tags=78%, list=34%, signal=117%
REACTOME_MRNA_PROCESSING	REACTOME_MRNA_PROCESSING		118	0.5151931	1.7691165	0.0	0.009540058	0.927	2550	tags=58%, list=34%, signal=88%
REACTOME_GLOBAL_GENOMIC_NER_GG_NER	REACTOME_GLOBAL_GENOMIC_NER_GG_NER		23	0.6719263	1.7689503	0.0012903226	0.009518513	0.928	1043	tags=48%, list=14%, signal=55%
RHEIN_ALL_GLUCOCORTICOID_THERAPY_DN	RHEIN_ALL_GLUCOCORTICOID_THERAPY_DN		312	0.48763543	1.7681012	0.0	0.009614938	0.93	2175	tags=40%, list=29%, signal=54%
SANSOM_APC_TARGETS_UP	SANSOM_APC_TARGETS_UP		70	0.5551197	1.7666394	0.0	0.009771173	0.932	1643	tags=50%, list=22%, signal=64%
REACTOME_DOUBLE_STRAND_BREAK_REPAIR	REACTOME_DOUBLE_STRAND_BREAK_REPAIR		14	0.7312139	1.7640371	0.0	0.010114068	0.937	557	tags=50%, list=7%, signal=54%
REACTOME_NEP_NS2_INTERACTS_WITH_THE_CELLULAR_EXPORT_MACHINERY	REACTOME_NEP_NS2_INTERACTS_WITH_THE_CELLULAR_EXPORT_MACHINERY		25	0.66005766	1.7632115	0.0	0.0102172755	0.939	1771	tags=68%, list=24%, signal=89%
KEGG_NUCLEOTIDE_EXCISION_REPAIR	KEGG_NUCLEOTIDE_EXCISION_REPAIR		31	0.6243002	1.7630639	0.0024630541	0.010216842	0.94	1852	tags=55%, list=25%, signal=73%
BENPORATH_ES_2	BENPORATH_ES_2		14	0.72655225	1.7630403	0.0027662518	0.010179914	0.94	977	tags=50%, list=13%, signal=57%
WANG_METASTASIS_OF_BREAST_CANCER_ESR1_UP	WANG_METASTASIS_OF_BREAST_CANCER_ESR1_UP		14	0.73424995	1.7604463	0.0026595744	0.010588597	0.948	796	tags=43%, list=11%, signal=48%
MANN_RESPONSE_TO_AMIFOSTINE_DN	MANN_RESPONSE_TO_AMIFOSTINE_DN		10	0.8042142	1.7601223	0.0014492754	0.010603044	0.95	32	tags=30%, list=0%, signal=30%
MIPS_RC_COMPLEX_DURING_G2_M_PHASE_OF_CELL_CYCLE	MIPS_RC_COMPLEX_DURING_G2_M_PHASE_OF_CELL_CYCLE		10	0.8083752	1.758532	0.0	0.010836597	0.953	671	tags=60%, list=9%, signal=66%
CHIARADONNA_NEOPLASTIC_TRANSFORMATION_KRAS_UP	CHIARADONNA_NEOPLASTIC_TRANSFORMATION_KRAS_UP		85	0.5337526	1.7576153	0.0	0.01094448	0.955	660	tags=25%, list=9%, signal=27%
RODRIGUES_THYROID_CARCINOMA_ANAPLASTIC_UP	RODRIGUES_THYROID_CARCINOMA_ANAPLASTIC_UP		392	0.48124552	1.7563248	0.0	0.011106734	0.958	1851	tags=36%, list=25%, signal=45%
BROWNE_HCMV_INFECTION_2HR_DN	BROWNE_HCMV_INFECTION_2HR_DN		31	0.6229718	1.755797	0.0037546933	0.011164171	0.96	108	tags=23%, list=1%, signal=23%
REACTOME_PROCESSING_OF_CAPPED_INTRON_CONTAINING_PRE_MRNA	REACTOME_PROCESSING_OF_CAPPED_INTRON_CONTAINING_PRE_MRNA		107	0.5240882	1.7520282	0.0	0.0118434895	0.968	2597	tags=62%, list=35%, signal=93%
REACTOME_HOMOLOGOUS_RECOMBINATION_REPAIR_OF_REPLICATION_INDEPENDENT_DOUBLE_STRAND_BREAKS	REACTOME_HOMOLOGOUS_RECOMBINATION_REPAIR_OF_REPLICATION_INDEPENDENT_DOUBLE_STRAND_BREAKS		11	0.77036273	1.7518278	0.0027434842	0.011830366	0.968	557	tags=64%, list=7%, signal=69%
WHITFIELD_CELL_CYCLE_G1_S	WHITFIELD_CELL_CYCLE_G1_S		65	0.5477993	1.751799	0.0	0.011785384	0.968	1252	tags=43%, list=17%, signal=51%
GINESTIER_BREAST_CANCER_20Q13_AMPLIFICATION_DN	GINESTIER_BREAST_CANCER_20Q13_AMPLIFICATION_DN		94	0.51979065	1.7516716	0.0	0.011753459	0.968	1982	tags=48%, list=27%, signal=64%
YIH_RESPONSE_TO_ARSENITE_C1	YIH_RESPONSE_TO_ARSENITE_C1		16	0.71542877	1.745175	0.0013175231	0.012927361	0.979	721	tags=25%, list=10%, signal=28%
REACTOME_APC_C_CDC20_MEDIATED_DEGRADATION_OF_MITOTIC_PROTEINS	REACTOME_APC_C_CDC20_MEDIATED_DEGRADATION_OF_MITOTIC_PROTEINS		54	0.55963343	1.7444574	0.0	0.0130210705	0.98	99	tags=11%, list=1%, signal=11%
MARTINEZ_RESPONSE_TO_TRABECTEDIN_DN	MARTINEZ_RESPONSE_TO_TRABECTEDIN_DN		191	0.49090314	1.7441168	0.0	0.013025924	0.98	1727	tags=39%, list=23%, signal=49%
RHODES_CANCER_META_SIGNATURE	RHODES_CANCER_META_SIGNATURE		53	0.5572528	1.7426312	0.0011454754	0.013291149	0.98	851	tags=25%, list=11%, signal=27%
GARCIA_TARGETS_OF_FLI1_AND_DAX1_DN	GARCIA_TARGETS_OF_FLI1_AND_DAX1_DN		87	0.5304367	1.7411724	0.0011049723	0.013522886	0.981	622	tags=25%, list=8%, signal=27%
YAMAZAKI_TCEB3_TARGETS_DN	YAMAZAKI_TCEB3_TARGETS_DN		144	0.5034729	1.7390374	0.0	0.013831219	0.985	1121	tags=26%, list=15%, signal=30%
REACTOME_APC_C_CDC20_MEDIATED_DEGRADATION_OF_CYCLIN_B	REACTOME_APC_C_CDC20_MEDIATED_DEGRADATION_OF_CYCLIN_B		10	0.7895279	1.7377626	0.005586592	0.014015619	0.986	75	tags=30%, list=1%, signal=30%
RAMASWAMY_METASTASIS_UP	RAMASWAMY_METASTASIS_UP		49	0.56941855	1.7368431	0.002317497	0.014137284	0.988	2118	tags=53%, list=28%, signal=74%
BIOCARTA_SRCRPTP_PATHWAY	BIOCARTA_SRCRPTP_PATHWAY		10	0.785643	1.7303327	0.0014144272	0.015527015	0.993	117	tags=40%, list=2%, signal=41%
ARACNE_ALK-NETWORK	ARACNE_ALK-NETWORK		12	0.7404244	1.7297385	0.0042253523	0.015587102	0.993	305	tags=50%, list=4%, signal=52%
MAYBURD_RESPONSE_TO_L663536_UP	MAYBURD_RESPONSE_TO_L663536_UP		16	0.69989836	1.7294556	0.0026525198	0.01559161	0.993	769	tags=44%, list=10%, signal=49%
MIPS_C_COMPLEX_SPLICEOSOME	MIPS_C_COMPLEX_SPLICEOSOME		62	0.547706	1.7289795	0.0011520737	0.01563565	0.993	2517	tags=65%, list=34%, signal=97%
LEE_LIVER_CANCER_SURVIVAL_DN	LEE_LIVER_CANCER_SURVIVAL_DN		118	0.5033027	1.7270666	0.0	0.015952803	0.994	1609	tags=32%, list=22%, signal=40%
ZHAN_V1_LATE_DIFFERENTIATION_GENES_DN	ZHAN_V1_LATE_DIFFERENTIATION_GENES_DN		12	0.74560785	1.7253014	0.0040431265	0.016391609	0.997	1294	tags=67%, list=17%, signal=81%
FERRANDO_T_ALL_WITH_MLL_ENL_FUSION_DN	FERRANDO_T_ALL_WITH_MLL_ENL_FUSION_DN		68	0.53446704	1.7232754	0.0011376564	0.016854398	0.998	307	tags=18%, list=4%, signal=18%
NUNODA_RESPONSE_TO_DASATINIB_IMATINIB_UP	NUNODA_RESPONSE_TO_DASATINIB_IMATINIB_UP		18	0.69219553	1.7225136	0.0	0.016965464	0.998	522	tags=33%, list=7%, signal=36%
CHIANG_LIVER_CANCER_SUBCLASS_UNANNOTATED_DN	CHIANG_LIVER_CANCER_SUBCLASS_UNANNOTATED_DN		139	0.50153744	1.7175163	0.0	0.017999452	0.998	1038	tags=22%, list=14%, signal=25%
MODY_HIPPOCAMPUS_PRENATAL	MODY_HIPPOCAMPUS_PRENATAL		36	0.58592176	1.7151285	0.0024479805	0.01852627	0.998	1787	tags=42%, list=24%, signal=55%
YU_BAP1_TARGETS	YU_BAP1_TARGETS		17	0.68671644	1.7143406	0.005194805	0.018644903	0.998	1556	tags=65%, list=21%, signal=82%
ELVIDGE_HYPOXIA_DN	ELVIDGE_HYPOXIA_DN		104	0.51255924	1.71425	0.0010649627	0.018599974	0.998	1626	tags=35%, list=22%, signal=44%
JOHANSSON_GLIOMAGENESIS_BY_PDGFB_UP	JOHANSSON_GLIOMAGENESIS_BY_PDGFB_UP		46	0.56228226	1.7064284	0.003508772	0.020623675	0.999	422	tags=22%, list=6%, signal=23%
MOREAUX_B_LYMPHOCYTE_MATURATION_BY_TACI_DN	MOREAUX_B_LYMPHOCYTE_MATURATION_BY_TACI_DN		42	0.577056	1.7057495	0.0011947431	0.02073986	0.999	1581	tags=45%, list=21%, signal=57%
REACTOME_RESOLUTION_OF_AP_SITES_VIA_THE_MULTIPLE_NUCLEOTIDE_PATCH_REPLACEMENT_PATHWAY	REACTOME_RESOLUTION_OF_AP_SITES_VIA_THE_MULTIPLE_NUCLEOTIDE_PATCH_REPLACEMENT_PATHWAY		14	0.713022	1.7049142	0.0	0.020931374	0.999	307	tags=36%, list=4%, signal=37%
REACTOME_TRANSCRIPTION_COUPLED_NER_TC_NER	REACTOME_TRANSCRIPTION_COUPLED_NER_TC_NER		31	0.60440207	1.7034317	0.0036809817	0.02133128	0.999	671	tags=29%, list=9%, signal=32%
LEE_BMP2_TARGETS_DN	LEE_BMP2_TARGETS_DN		496	0.46585932	1.7021135	0.0	0.02166476	0.999	1827	tags=39%, list=25%, signal=48%
KANG_DOXORUBICIN_RESISTANCE_DN	KANG_DOXORUBICIN_RESISTANCE_DN		11	0.7522704	1.7007718	0.007072136	0.021967314	1.0	203	tags=27%, list=3%, signal=28%
VANHARANTA_UTERINE_FIBROID_WITH_7Q_DELETION_UP	VANHARANTA_UTERINE_FIBROID_WITH_7Q_DELETION_UP		54	0.5405042	1.6989971	0.002301496	0.022435151	1.0	1901	tags=56%, list=26%, signal=74%
SHIPP_DLBCL_VS_FOLLICULAR_LYMPHOMA_UP	SHIPP_DLBCL_VS_FOLLICULAR_LYMPHOMA_UP		40	0.58245933	1.6966697	0.0011933175	0.023090173	1.0	186	tags=18%, list=3%, signal=18%
SCHUHMACHER_MYC_TARGETS_UP	SCHUHMACHER_MYC_TARGETS_UP		68	0.52966076	1.6939105	0.0011312218	0.023907397	1.0	1650	tags=44%, list=22%, signal=56%
REACTOME_RNA_POL_I_PROMOTER_OPENING	REACTOME_RNA_POL_I_PROMOTER_OPENING		11	0.7385374	1.6939052	0.010144928	0.02382608	1.0	395	tags=45%, list=5%, signal=48%
PID_RB_1PATHWAY	PID_RB_1PATHWAY		40	0.5710851	1.6932683	0.0011904762	0.023933403	1.0	1835	tags=50%, list=25%, signal=66%
MARKEY_RB1_CHRONIC_LOF_UP	MARKEY_RB1_CHRONIC_LOF_UP		73	0.5229988	1.6931756	0.0	0.023880962	1.0	1013	tags=32%, list=14%, signal=36%
BURTON_ADIPOGENESIS_PEAK_AT_16HR	BURTON_ADIPOGENESIS_PEAK_AT_16HR		30	0.5962704	1.6906129	0.0037783375	0.024662126	1.0	2081	tags=60%, list=28%, signal=83%
ZHAN_VARIABLE_EARLY_DIFFERENTIATION_GENES_DN	ZHAN_VARIABLE_EARLY_DIFFERENTIATION_GENES_DN		28	0.6037766	1.6904832	0.0049937577	0.024647221	1.0	1139	tags=32%, list=15%, signal=38%
TIEN_INTESTINE_PROBIOTICS_24HR_UP	TIEN_INTESTINE_PROBIOTICS_24HR_UP		480	0.458378	1.6862161	0.0	0.025954748	1.0	1013	tags=20%, list=14%, signal=22%
NIKOLSKY_BREAST_CANCER_7P22_AMPLICON	NIKOLSKY_BREAST_CANCER_7P22_AMPLICON		12	0.725812	1.6859347	0.004297994	0.025963427	1.0	988	tags=50%, list=13%, signal=58%
ZHENG_IL22_SIGNALING_DN	ZHENG_IL22_SIGNALING_DN		16	0.6806191	1.6837469	0.0040053404	0.026558736	1.0	664	tags=38%, list=9%, signal=41%
YUAN_ZNF143_PARTNERS	YUAN_ZNF143_PARTNERS		14	0.7077404	1.6807348	0.0054945056	0.02747581	1.0	961	tags=43%, list=13%, signal=49%
REACTOME_RNA_POL_I_RNA_POL_III_AND_MITOCHONDRIAL_TRANSCRIPTION	REACTOME_RNA_POL_I_RNA_POL_III_AND_MITOCHONDRIAL_TRANSCRIPTION		49	0.547961	1.680645	0.0036452005	0.027434997	1.0	1353	tags=39%, list=18%, signal=47%
PID_ATR_PATHWAY	PID_ATR_PATHWAY		23	0.63352066	1.6797084	0.003816794	0.02768778	1.0	693	tags=48%, list=9%, signal=53%
REACTOME_PACKAGING_OF_TELOMERE_ENDS	REACTOME_PACKAGING_OF_TELOMERE_ENDS		14	0.7038251	1.6788082	0.0066401064	0.027933154	1.0	395	tags=36%, list=5%, signal=38%
GROSS_HYPOXIA_VIA_ELK3_UP	GROSS_HYPOXIA_VIA_ELK3_UP		132	0.49097568	1.6748704	0.0	0.029352877	1.0	1590	tags=31%, list=21%, signal=39%
REACTOME_TRANSCRIPTION	REACTOME_TRANSCRIPTION		106	0.50054365	1.6723382	0.0	0.030218458	1.0	2892	tags=68%, list=39%, signal=110%
GARY_CD5_TARGETS_DN	GARY_CD5_TARGETS_DN		262	0.46012232	1.6683292	0.0	0.0316982	1.0	2353	tags=47%, list=32%, signal=66%
GEORGES_TARGETS_OF_MIR192_AND_MIR215	GEORGES_TARGETS_OF_MIR192_AND_MIR215		402	0.45464218	1.6677736	0.0	0.031788845	1.0	1435	tags=30%, list=19%, signal=35%
REACTOME_RNA_POL_III_CHAIN_ELONGATION	REACTOME_RNA_POL_III_CHAIN_ELONGATION		13	0.7095503	1.6664532	0.010914052	0.03224222	1.0	637	tags=38%, list=9%, signal=42%
GRAHAM_CML_DIVIDING_VS_NORMAL_DIVIDING_UP	GRAHAM_CML_DIVIDING_VS_NORMAL_DIVIDING_UP		10	0.7558897	1.6656889	0.0085227275	0.032446656	1.0	351	tags=40%, list=5%, signal=42%
XU_HGF_SIGNALING_NOT_VIA_AKT1_48HR_DN	XU_HGF_SIGNALING_NOT_VIA_AKT1_48HR_DN		16	0.67958194	1.6645029	0.002670227	0.032865226	1.0	311	tags=31%, list=4%, signal=33%
GEORGES_CELL_CYCLE_MIR192_TARGETS	GEORGES_CELL_CYCLE_MIR192_TARGETS		45	0.5562651	1.6613069	0.0036144578	0.034071017	1.0	1388	tags=42%, list=19%, signal=52%
REACTOME_DNA_REPAIR	REACTOME_DNA_REPAIR		67	0.5195901	1.6608763	0.0	0.03416609	1.0	1310	tags=34%, list=18%, signal=41%
LOPEZ_MESOTHELIOMA_SURVIVAL_OVERALL_DN	LOPEZ_MESOTHELIOMA_SURVIVAL_OVERALL_DN		13	0.6982045	1.6515638	0.006830601	0.038264472	1.0	69	tags=23%, list=1%, signal=23%
KEGG_BASE_EXCISION_REPAIR	KEGG_BASE_EXCISION_REPAIR		25	0.61961395	1.6504605	0.0050314465	0.038675427	1.0	1852	tags=60%, list=25%, signal=80%
REACTOME_BASE_EXCISION_REPAIR	REACTOME_BASE_EXCISION_REPAIR		16	0.65811753	1.6476839	0.0121951215	0.039951894	1.0	1852	tags=63%, list=25%, signal=83%
FLOTHO_PEDIATRIC_ALL_THERAPY_RESPONSE_DN	FLOTHO_PEDIATRIC_ALL_THERAPY_RESPONSE_DN		17	0.6599475	1.6457262	0.005319149	0.040711917	1.0	860	tags=41%, list=12%, signal=46%
IRITANI_MAD1_TARGETS_DN	IRITANI_MAD1_TARGETS_DN		33	0.5838041	1.6455247	0.0025575447	0.040671278	1.0	2042	tags=48%, list=27%, signal=67%
KEGG_HOMOLOGOUS_RECOMBINATION	KEGG_HOMOLOGOUS_RECOMBINATION		14	0.68225676	1.6440761	0.012211669	0.04127969	1.0	557	tags=50%, list=7%, signal=54%
MIPS_SPLICEOSOME	MIPS_SPLICEOSOME		100	0.4852904	1.6426804	0.0	0.04182451	1.0	2880	tags=58%, list=39%, signal=93%
BILANGES_SERUM_SENSITIVE_VIA_TSC2	BILANGES_SERUM_SENSITIVE_VIA_TSC2		25	0.59640527	1.6409109	0.010652463	0.042608876	1.0	2487	tags=76%, list=33%, signal=114%
RAY_TUMORIGENESIS_BY_ERBB2_CDC25A_UP	RAY_TUMORIGENESIS_BY_ERBB2_CDC25A_UP		50	0.5433307	1.6399977	0.0035169988	0.042980067	1.0	957	tags=26%, list=13%, signal=30%
BORCZUK_MALIGNANT_MESOTHELIOMA_UP	BORCZUK_MALIGNANT_MESOTHELIOMA_UP		247	0.45442834	1.6380132	0.0	0.043817956	1.0	1717	tags=29%, list=23%, signal=37%
WAKASUGI_HAVE_ZNF143_BINDING_SITES	WAKASUGI_HAVE_ZNF143_BINDING_SITES		33	0.5657711	1.6353098	0.004950495	0.045080297	1.0	1719	tags=48%, list=23%, signal=63%
SAGIV_CD24_TARGETS_UP	SAGIV_CD24_TARGETS_UP		18	0.6482486	1.6333065	0.008086253	0.045993876	1.0	1012	tags=28%, list=14%, signal=32%
REACTOME_PURINE_METABOLISM	REACTOME_PURINE_METABOLISM		21	0.62673503	1.6322931	0.0039421814	0.046465438	1.0	1505	tags=43%, list=20%, signal=54%
POMEROY_MEDULLOBLASTOMA_PROGNOSIS_DN	POMEROY_MEDULLOBLASTOMA_PROGNOSIS_DN		37	0.5639331	1.6301155	0.0048721074	0.047569107	1.0	1573	tags=41%, list=21%, signal=51%
REACTOME_M_G1_TRANSITION	REACTOME_M_G1_TRANSITION		58	0.5199388	1.6274164	0.0011682243	0.048947997	1.0	1090	tags=29%, list=15%, signal=34%
REACTOME_NUCLEOTIDE_EXCISION_REPAIR	REACTOME_NUCLEOTIDE_EXCISION_REPAIR		35	0.56508815	1.6267856	0.006203474	0.049136132	1.0	1043	tags=31%, list=14%, signal=36%
DANG_MYC_TARGETS_UP	DANG_MYC_TARGETS_UP		110	0.48362976	1.6240666	0.0021551724	0.050685998	1.0	1249	tags=27%, list=17%, signal=32%
ZHAN_EARLY_DIFFERENTIATION_GENES_DN	ZHAN_EARLY_DIFFERENTIATION_GENES_DN		30	0.5807183	1.6220222	0.00875	0.051701188	1.0	411	tags=20%, list=6%, signal=21%
MIPS_DNA_SYNTHESOME_COMPLEX	MIPS_DNA_SYNTHESOME_COMPLEX		13	0.7015332	1.6205672	0.014666666	0.052401666	1.0	1852	tags=77%, list=25%, signal=102%
ZAMORA_NOS2_TARGETS_UP	ZAMORA_NOS2_TARGETS_UP		54	0.51867145	1.6205449	0.00472255	0.052259848	1.0	954	tags=28%, list=13%, signal=32%
HOLLEMAN_PREDNISOLONE_RESISTANCE_B_ALL_UP	HOLLEMAN_PREDNISOLONE_RESISTANCE_B_ALL_UP		22	0.6114116	1.6198815	0.0077120825	0.052503116	1.0	2273	tags=64%, list=31%, signal=91%
MIPS_NUA4_TIP60_HAT_COMPLEX	MIPS_NUA4_TIP60_HAT_COMPLEX		11	0.7202233	1.6192712	0.0137551585	0.052707054	1.0	1162	tags=55%, list=16%, signal=65%
HAMAI_APOPTOSIS_VIA_TRAIL_UP	HAMAI_APOPTOSIS_VIA_TRAIL_UP		375	0.4404829	1.6170275	0.0	0.05392032	1.0	1650	tags=30%, list=22%, signal=36%
DAZARD_RESPONSE_TO_UV_NHEK_DN	DAZARD_RESPONSE_TO_UV_NHEK_DN		237	0.4477096	1.61603	0.0	0.054360427	1.0	2507	tags=54%, list=34%, signal=78%
PEART_HDAC_PROLIFERATION_CLUSTER_UP	PEART_HDAC_PROLIFERATION_CLUSTER_UP		45	0.53952223	1.6156764	0.0060827252	0.054438137	1.0	1313	tags=36%, list=18%, signal=43%
VERRECCHIA_RESPONSE_TO_TGFB1_C4	VERRECCHIA_RESPONSE_TO_TGFB1_C4		11	0.7146198	1.6083853	0.009831461	0.059020184	1.0	1279	tags=64%, list=17%, signal=77%
PENG_LEUCINE_DEPRIVATION_DN	PENG_LEUCINE_DEPRIVATION_DN		161	0.46026123	1.606935	0.0	0.059751675	1.0	2249	tags=37%, list=30%, signal=52%
PENG_GLUTAMINE_DEPRIVATION_UP	PENG_GLUTAMINE_DEPRIVATION_UP		25	0.59620744	1.6068199	0.009114583	0.059648454	1.0	1043	tags=32%, list=14%, signal=37%
HOLLEMAN_ASPARAGINASE_RESISTANCE_B_ALL_DN	HOLLEMAN_ASPARAGINASE_RESISTANCE_B_ALL_DN		12	0.69504106	1.6066173	0.014409222	0.059614286	1.0	127	tags=25%, list=2%, signal=25%
REACTOME_ANTIVIRAL_MECHANISM_BY_IFN_STIMULATED_GENES	REACTOME_ANTIVIRAL_MECHANISM_BY_IFN_STIMULATED_GENES		52	0.5285924	1.602724	0.0023310024	0.062132526	1.0	2593	tags=58%, list=35%, signal=88%
ZHONG_RESPONSE_TO_AZACITIDINE_AND_TSA_DN	ZHONG_RESPONSE_TO_AZACITIDINE_AND_TSA_DN		55	0.51676905	1.6016034	0.0034246575	0.06273278	1.0	1561	tags=36%, list=21%, signal=46%
PUIFFE_INVASION_INHIBITED_BY_ASCITES_UP	PUIFFE_INVASION_INHIBITED_BY_ASCITES_UP		62	0.514097	1.599158	0.0023364485	0.06423017	1.0	365	tags=18%, list=5%, signal=19%
HESS_TARGETS_OF_HOXA9_AND_MEIS1_UP	HESS_TARGETS_OF_HOXA9_AND_MEIS1_UP		43	0.53029704	1.5989611	0.006002401	0.06417593	1.0	952	tags=30%, list=13%, signal=34%
AIGNER_ZEB1_TARGETS	AIGNER_ZEB1_TARGETS		10	0.7410759	1.597289	0.011560693	0.0652051	1.0	516	tags=30%, list=7%, signal=32%
SANSOM_APC_TARGETS	SANSOM_APC_TARGETS		97	0.48202056	1.5950357	0.0010989011	0.06673626	1.0	1751	tags=39%, list=24%, signal=51%
KEGG_SPLICEOSOME	KEGG_SPLICEOSOME		83	0.48574182	1.5943699	0.0	0.06704289	1.0	2475	tags=54%, list=33%, signal=80%
MONNIER_POSTRADIATION_TUMOR_ESCAPE_UP	MONNIER_POSTRADIATION_TUMOR_ESCAPE_UP		221	0.4458882	1.5942298	0.0	0.06695011	1.0	2272	tags=43%, list=31%, signal=60%
PID_HES_HEYPATHWAY	PID_HES_HEYPATHWAY		29	0.5837099	1.5911716	0.01126408	0.06911828	1.0	1285	tags=41%, list=17%, signal=50%
IVANOVA_HEMATOPOIESIS_EARLY_PROGENITOR	IVANOVA_HEMATOPOIESIS_EARLY_PROGENITOR		249	0.44447565	1.5910755	0.0	0.068994015	1.0	1897	tags=36%, list=26%, signal=46%
DAZARD_UV_RESPONSE_CLUSTER_G6	DAZARD_UV_RESPONSE_CLUSTER_G6		115	0.47695404	1.5899688	0.0	0.06960948	1.0	2202	tags=48%, list=30%, signal=67%
REACTOME_MRNA_SPLICING	REACTOME_MRNA_SPLICING		80	0.48032162	1.5885361	0.004429679	0.07055511	1.0	2597	tags=56%, list=35%, signal=85%
NEWMAN_ERCC6_TARGETS_DN	NEWMAN_ERCC6_TARGETS_DN		12	0.6827743	1.585602	0.0154061625	0.07263599	1.0	1326	tags=58%, list=18%, signal=71%
REACTOME_G0_AND_EARLY_G1	REACTOME_G0_AND_EARLY_G1		11	0.70655763	1.5816438	0.019525802	0.07557712	1.0	1733	tags=73%, list=23%, signal=95%
REACTOME_MHC_CLASS_II_ANTIGEN_PRESENTATION	REACTOME_MHC_CLASS_II_ANTIGEN_PRESENTATION		64	0.5018828	1.5811262	0.009101251	0.07580779	1.0	584	tags=16%, list=8%, signal=17%
SANSOM_APC_MYC_TARGETS	SANSOM_APC_MYC_TARGETS		119	0.46612856	1.5806375	0.001059322	0.07603954	1.0	1666	tags=36%, list=22%, signal=46%
MARIADASON_RESPONSE_TO_BUTYRATE_SULINDAC_4	MARIADASON_RESPONSE_TO_BUTYRATE_SULINDAC_4		11	0.6934138	1.5805775	0.015647227	0.07587966	1.0	669	tags=45%, list=9%, signal=50%
REACTOME_GENERIC_TRANSCRIPTION_PATHWAY	REACTOME_GENERIC_TRANSCRIPTION_PATHWAY		104	0.47294807	1.5801307	0.0	0.076026134	1.0	1685	tags=42%, list=23%, signal=54%
REACTOME_HIV_LIFE_CYCLE	REACTOME_HIV_LIFE_CYCLE		86	0.48450252	1.5795583	0.0033557047	0.07624349	1.0	2425	tags=53%, list=33%, signal=78%
KOKKINAKIS_METHIONINE_DEPRIVATION_96HR_DN	KOKKINAKIS_METHIONINE_DEPRIVATION_96HR_DN		47	0.5122515	1.579456	0.009400705	0.07611231	1.0	590	tags=21%, list=8%, signal=23%
PID_MYC_ACTIVPATHWAY	PID_MYC_ACTIVPATHWAY		58	0.5069372	1.5747535	0.013513514	0.07972382	1.0	1249	tags=31%, list=17%, signal=37%
LIAO_METASTASIS	LIAO_METASTASIS		301	0.43303314	1.5734247	0.0	0.080654666	1.0	1012	tags=22%, list=14%, signal=25%
REACTOME_LATE_PHASE_OF_HIV_LIFE_CYCLE	REACTOME_LATE_PHASE_OF_HIV_LIFE_CYCLE		77	0.4827546	1.5733072	0.0056306305	0.080535434	1.0	2425	tags=55%, list=33%, signal=80%
MIPS_28S_RIBOSOMAL_SUBUNIT_MITOCHONDRIAL	MIPS_28S_RIBOSOMAL_SUBUNIT_MITOCHONDRIAL		20	0.5985641	1.571473	0.02464332	0.08197466	1.0	1459	tags=40%, list=20%, signal=50%
BAKER_HEMATOPOIESIS_STAT3_TARGETS	BAKER_HEMATOPOIESIS_STAT3_TARGETS		14	0.6436536	1.5703465	0.03443526	0.08268373	1.0	33	tags=14%, list=0%, signal=14%
PID_P53REGULATIONPATHWAY	PID_P53REGULATIONPATHWAY		40	0.52521986	1.5684215	0.0071856286	0.08411646	1.0	2364	tags=48%, list=32%, signal=69%
PENG_GLUTAMINE_DEPRIVATION_DN	PENG_GLUTAMINE_DEPRIVATION_DN		272	0.43222907	1.5653389	0.0	0.086624324	1.0	2528	tags=45%, list=34%, signal=65%
REACTOME_RECRUITMENT_OF_MITOTIC_CENTROSOME_PROTEINS_AND_COMPLEXES	REACTOME_RECRUITMENT_OF_MITOTIC_CENTROSOME_PROTEINS_AND_COMPLEXES		40	0.52346545	1.5649573	0.013580247	0.086723715	1.0	2069	tags=45%, list=28%, signal=62%
WELCSH_BRCA1_TARGETS_DN	WELCSH_BRCA1_TARGETS_DN		115	0.45707494	1.5647163	0.0010660981	0.086761884	1.0	2555	tags=53%, list=34%, signal=80%
NAKAMURA_TUMOR_ZONE_PERIPHERAL_VS_CENTRAL_UP	NAKAMURA_TUMOR_ZONE_PERIPHERAL_VS_CENTRAL_UP		174	0.43994042	1.5641466	0.0010330578	0.087153435	1.0	654	tags=17%, list=9%, signal=18%
CHICAS_RB1_TARGETS_LOW_SERUM	CHICAS_RB1_TARGETS_LOW_SERUM		60	0.5003267	1.5633696	0.0034364262	0.0875953	1.0	889	tags=22%, list=12%, signal=24%
ZHAN_MULTIPLE_MYELOMA_SUBGROUPS	ZHAN_MULTIPLE_MYELOMA_SUBGROUPS		27	0.5684089	1.562215	0.016455697	0.08841781	1.0	1397	tags=41%, list=19%, signal=50%
MIPS_MLL1_WDR5_COMPLEX	MIPS_MLL1_WDR5_COMPLEX		17	0.63052756	1.5591685	0.014965987	0.090984225	1.0	2083	tags=59%, list=28%, signal=82%
YANG_BREAST_CANCER_ESR1_BULK_DN	YANG_BREAST_CANCER_ESR1_BULK_DN		15	0.64930916	1.5590833	0.026610645	0.0908232	1.0	1029	tags=40%, list=14%, signal=46%
YAO_TEMPORAL_RESPONSE_TO_PROGESTERONE_CLUSTER_15	YAO_TEMPORAL_RESPONSE_TO_PROGESTERONE_CLUSTER_15		26	0.56948966	1.5581809	0.019875776	0.09142612	1.0	592	tags=27%, list=8%, signal=29%
JACKSON_DNMT1_TARGETS_DN	JACKSON_DNMT1_TARGETS_DN		18	0.61601806	1.5576954	0.016795866	0.09161934	1.0	590	tags=28%, list=8%, signal=30%
DORMOY_ELAVL1_TARGETS	DORMOY_ELAVL1_TARGETS		10	0.69492614	1.5575106	0.033850495	0.09156212	1.0	1445	tags=50%, list=19%, signal=62%
SCHWAB_TARGETS_OF_BMYB_POLYMORPHIC_VARIANTS_UP	SCHWAB_TARGETS_OF_BMYB_POLYMORPHIC_VARIANTS_UP		11	0.67650187	1.5565456	0.02328767	0.09215148	1.0	786	tags=36%, list=11%, signal=41%
LIU_VMYB_TARGETS_UP	LIU_VMYB_TARGETS_UP		92	0.46242326	1.5564375	0.0032930844	0.0920072	1.0	744	tags=23%, list=10%, signal=25%
TRAYNOR_RETT_SYNDROM_UP	TRAYNOR_RETT_SYNDROM_UP		20	0.5995415	1.5553831	0.021935483	0.09265772	1.0	1981	tags=55%, list=27%, signal=75%
HASLINGER_B_CLL_WITH_6Q21_DELETION	HASLINGER_B_CLL_WITH_6Q21_DELETION		13	0.66466945	1.5548692	0.013927577	0.09288516	1.0	1429	tags=62%, list=19%, signal=76%
PEDERSEN_METASTASIS_BY_ERBB2_ISOFORM_7	PEDERSEN_METASTASIS_BY_ERBB2_ISOFORM_7		197	0.4345484	1.5491555	0.0	0.09813287	1.0	1489	tags=31%, list=20%, signal=38%
DEURIG_T_CELL_PROLYMPHOCYTIC_LEUKEMIA_UP	DEURIG_T_CELL_PROLYMPHOCYTIC_LEUKEMIA_UP		212	0.43516225	1.5491368	0.0030706243	0.09790257	1.0	1199	tags=28%, list=16%, signal=32%
ANASTASSIOU_CANCER_MESENCHYMAL_TRANSITION_SIGNATURE	ANASTASSIOU_CANCER_MESENCHYMAL_TRANSITION_SIGNATURE		45	0.5159626	1.5486492	0.023337223	0.09814296	1.0	2487	tags=62%, list=33%, signal=93%
MEINHOLD_OVARIAN_CANCER_LOW_GRADE_UP	MEINHOLD_OVARIAN_CANCER_LOW_GRADE_UP		14	0.6477146	1.5481379	0.039889958	0.098411806	1.0	958	tags=36%, list=13%, signal=41%
PENG_GLUCOSE_DEPRIVATION_DN	PENG_GLUCOSE_DEPRIVATION_DN		125	0.44724703	1.5478984	0.0	0.098424785	1.0	1449	tags=26%, list=19%, signal=32%
WHITFIELD_CELL_CYCLE_M_G1	WHITFIELD_CELL_CYCLE_M_G1		87	0.46549863	1.542905	0.005446623	0.103398375	1.0	1246	tags=25%, list=17%, signal=30%
HOLLEMAN_VINCRISTINE_RESISTANCE_ALL_UP	HOLLEMAN_VINCRISTINE_RESISTANCE_ALL_UP		16	0.63130057	1.5413886	0.029333333	0.10468439	1.0	965	tags=38%, list=13%, signal=43%
BUCKANOVICH_T_LYMPHOCYTE_HOMING_ON_TUMOR_DN	BUCKANOVICH_T_LYMPHOCYTE_HOMING_ON_TUMOR_DN		17	0.61278963	1.5411615	0.025906736	0.10467704	1.0	348	tags=24%, list=5%, signal=25%
ACEVEDO_LIVER_CANCER_WITH_H3K9ME3_DN	ACEVEDO_LIVER_CANCER_WITH_H3K9ME3_DN		28	0.5697807	1.5407382	0.023255814	0.10486813	1.0	238	tags=25%, list=3%, signal=26%
PLASARI_TGFB1_TARGETS_10HR_DN	PLASARI_TGFB1_TARGETS_10HR_DN		132	0.44866177	1.5406016	0.0010515247	0.1047532	1.0	1013	tags=29%, list=14%, signal=33%
NIKOLSKY_BREAST_CANCER_20Q12_Q13_AMPLICON	NIKOLSKY_BREAST_CANCER_20Q12_Q13_AMPLICON		63	0.48921907	1.5402722	0.012276785	0.10486477	1.0	1980	tags=48%, list=27%, signal=64%
KEGG_ONE_CARBON_POOL_BY_FOLATE	KEGG_ONE_CARBON_POOL_BY_FOLATE		10	0.6926721	1.5398327	0.0335277	0.105037004	1.0	1476	tags=70%, list=20%, signal=87%
SHETH_LIVER_CANCER_VS_TXNIP_LOSS_PAM3	SHETH_LIVER_CANCER_VS_TXNIP_LOSS_PAM3		43	0.51483923	1.5356249	0.01831502	0.10943184	1.0	438	tags=19%, list=6%, signal=20%
MIPS_ALL_1_SUPERCOMPLEX	MIPS_ALL_1_SUPERCOMPLEX		17	0.59997344	1.5319086	0.022339027	0.11323671	1.0	1651	tags=47%, list=22%, signal=60%
LAIHO_COLORECTAL_CANCER_SERRATED_DN	LAIHO_COLORECTAL_CANCER_SERRATED_DN		56	0.49437356	1.5315742	0.009237875	0.11330701	1.0	1627	tags=38%, list=22%, signal=48%
THILLAINADESAN_ZNF217_TARGETS_UP	THILLAINADESAN_ZNF217_TARGETS_UP		23	0.58083445	1.530781	0.01953125	0.11394026	1.0	2191	tags=65%, list=29%, signal=92%
MIPS_CF_IIAM_COMPLEX	MIPS_CF_IIAM_COMPLEX		12	0.67915183	1.5306072	0.031609196	0.11383434	1.0	1491	tags=67%, list=20%, signal=83%
SCHLOSSER_MYC_TARGETS_AND_SERUM_RESPONSE_DN	SCHLOSSER_MYC_TARGETS_AND_SERUM_RESPONSE_DN		44	0.5008448	1.5292166	0.013157895	0.11507771	1.0	2442	tags=68%, list=33%, signal=101%
SUNG_METASTASIS_STROMA_DN	SUNG_METASTASIS_STROMA_DN		37	0.52517724	1.5288916	0.01939394	0.11518209	1.0	1487	tags=41%, list=20%, signal=50%
MIPS_INTEGRATOR_RNAPII_COMPLEX	MIPS_INTEGRATOR_RNAPII_COMPLEX		10	0.6926941	1.527875	0.027027028	0.11599564	1.0	508	tags=30%, list=7%, signal=32%
REACTOME_PROCESSING_OF_INTRONLESS_PRE_MRNAS	REACTOME_PROCESSING_OF_INTRONLESS_PRE_MRNAS		10	0.69057506	1.5272727	0.040616248	0.11643418	1.0	1110	tags=60%, list=15%, signal=70%
SMITH_LIVER_CANCER	SMITH_LIVER_CANCER		35	0.5315712	1.5272247	0.021608643	0.11618672	1.0	357	tags=17%, list=5%, signal=18%
SMID_BREAST_CANCER_BASAL_UP	SMID_BREAST_CANCER_BASAL_UP		368	0.41888115	1.5269227	0.0	0.11626709	1.0	901	tags=21%, list=12%, signal=23%
ELVIDGE_HIF1A_AND_HIF2A_TARGETS_UP	ELVIDGE_HIF1A_AND_HIF2A_TARGETS_UP		32	0.5339114	1.5261087	0.02625	0.116866365	1.0	1831	tags=38%, list=25%, signal=50%
KEGG_PYRIMIDINE_METABOLISM	KEGG_PYRIMIDINE_METABOLISM		57	0.49101534	1.526017	0.006936416	0.11667108	1.0	2275	tags=47%, list=31%, signal=68%
PID_BARD1PATHWAY	PID_BARD1PATHWAY		21	0.5797482	1.5258597	0.021907216	0.116585426	1.0	1397	tags=48%, list=19%, signal=58%
ZHAN_MULTIPLE_MYELOMA_CD2_DN	ZHAN_MULTIPLE_MYELOMA_CD2_DN		23	0.56952	1.5257679	0.02617801	0.116404116	1.0	493	tags=26%, list=7%, signal=28%
BIOCARTA_CARM_ER_PATHWAY	BIOCARTA_CARM_ER_PATHWAY		26	0.5666441	1.5256956	0.016270338	0.11618273	1.0	2109	tags=58%, list=28%, signal=80%
OUYANG_PROSTATE_CANCER_PROGRESSION_DN	OUYANG_PROSTATE_CANCER_PROGRESSION_DN		14	0.6384222	1.5252955	0.021008404	0.11632256	1.0	813	tags=36%, list=11%, signal=40%
REACTOME_RNA_POL_III_TRANSCRIPTION_INITIATION_FROM_TYPE_3_PROMOTER	REACTOME_RNA_POL_III_TRANSCRIPTION_INITIATION_FROM_TYPE_3_PROMOTER		20	0.56849843	1.5246142	0.039540816	0.116783306	1.0	637	tags=30%, list=9%, signal=33%
IWANAGA_E2F1_TARGETS_INDUCED_BY_SERUM	IWANAGA_E2F1_TARGETS_INDUCED_BY_SERUM		15	0.6283324	1.5244869	0.027285129	0.11663973	1.0	2073	tags=60%, list=28%, signal=83%
MIPS_17S_U2_SNRNP	MIPS_17S_U2_SNRNP		28	0.5500963	1.5228958	0.02	0.11807761	1.0	2165	tags=54%, list=29%, signal=75%
MIPS_BRAFT_COMPLEX	MIPS_BRAFT_COMPLEX		11	0.66825396	1.5205989	0.048158642	0.1203876	1.0	1114	tags=45%, list=15%, signal=53%
GHO_ATF5_TARGETS_DN	GHO_ATF5_TARGETS_DN		13	0.6402003	1.5202361	0.040650405	0.12048748	1.0	384	tags=23%, list=5%, signal=24%
REACTOME_CLEAVAGE_OF_GROWING_TRANSCRIPT_IN_THE_TERMINATION_REGION_	REACTOME_CLEAVAGE_OF_GROWING_TRANSCRIPT_IN_THE_TERMINATION_REGION_		25	0.5572796	1.5198818	0.028097063	0.12056925	1.0	2517	tags=68%, list=34%, signal=102%
THUM_MIR21_TARGETS_HEART_DISEASE_UP	THUM_MIR21_TARGETS_HEART_DISEASE_UP		11	0.6744451	1.5195575	0.028965518	0.120668374	1.0	743	tags=45%, list=10%, signal=50%
DING_LUNG_CANCER_EXPRESSION_BY_COPY_NUMBER	DING_LUNG_CANCER_EXPRESSION_BY_COPY_NUMBER		62	0.4792838	1.5179062	0.008018328	0.1222603	1.0	2157	tags=45%, list=29%, signal=63%
LABBE_WNT3A_TARGETS_UP	LABBE_WNT3A_TARGETS_UP		78	0.46400994	1.5168637	0.0033860046	0.12308616	1.0	754	tags=18%, list=10%, signal=20%
BUYTAERT_PHOTODYNAMIC_THERAPY_STRESS_DN	BUYTAERT_PHOTODYNAMIC_THERAPY_STRESS_DN		429	0.41379526	1.5159146	0.0	0.12391801	1.0	1594	tags=31%, list=21%, signal=37%
BIOCARTA_CELLCYCLE_PATHWAY	BIOCARTA_CELLCYCLE_PATHWAY		17	0.5991164	1.513666	0.03576159	0.12636614	1.0	1591	tags=41%, list=21%, signal=52%
CHEOK_RESPONSE_TO_MERCAPTOPURINE_AND_HD_MTX_DN	CHEOK_RESPONSE_TO_MERCAPTOPURINE_AND_HD_MTX_DN		16	0.60161734	1.5132923	0.03846154	0.12654163	1.0	2034	tags=69%, list=27%, signal=94%
DACOSTA_UV_RESPONSE_VIA_ERCC3_COMMON_DN	DACOSTA_UV_RESPONSE_VIA_ERCC3_COMMON_DN		371	0.41453144	1.5091416	0.0	0.13124569	1.0	2288	tags=42%, list=31%, signal=57%
FAELT_B_CLL_WITH_VH3_21_UP	FAELT_B_CLL_WITH_VH3_21_UP		31	0.53393066	1.5088924	0.03194103	0.13123368	1.0	639	tags=26%, list=9%, signal=28%
MIPS_CDC5L_COMPLEX	MIPS_CDC5L_COMPLEX		23	0.5595943	1.5087911	0.042801555	0.13105483	1.0	2517	tags=61%, list=34%, signal=92%
CAIRO_PML_TARGETS_BOUND_BY_MYC_UP	CAIRO_PML_TARGETS_BOUND_BY_MYC_UP		18	0.5967348	1.5045588	0.036505867	0.13590892	1.0	1232	tags=39%, list=17%, signal=46%
PID_NOTCH_PATHWAY	PID_NOTCH_PATHWAY		35	0.52312976	1.5035881	0.02503129	0.1368364	1.0	890	tags=26%, list=12%, signal=29%
REACTOME_RNA_POL_III_TRANSCRIPTION	REACTOME_RNA_POL_III_TRANSCRIPTION		25	0.5444214	1.5026625	0.043824703	0.13766257	1.0	857	tags=32%, list=12%, signal=36%
GROSS_HYPOXIA_VIA_ELK3_ONLY_DN	GROSS_HYPOXIA_VIA_ELK3_ONLY_DN		28	0.5438543	1.5025948	0.026282854	0.13742565	1.0	1462	tags=39%, list=20%, signal=49%
LOPEZ_MESOTHELIOMA_SURVIVAL_WORST_VS_BEST_UP	LOPEZ_MESOTHELIOMA_SURVIVAL_WORST_VS_BEST_UP		11	0.6491034	1.5019838	0.05602241	0.13797395	1.0	107	tags=27%, list=1%, signal=28%
REACTOME_RNA_POL_III_TRANSCRIPTION_INITIATION_FROM_TYPE_2_PROMOTER	REACTOME_RNA_POL_III_TRANSCRIPTION_INITIATION_FROM_TYPE_2_PROMOTER		17	0.6022831	1.5019219	0.045513652	0.13773356	1.0	1190	tags=41%, list=16%, signal=49%
HAHTOLA_SEZARY_SYNDROM_UP	HAHTOLA_SEZARY_SYNDROM_UP		68	0.46518993	1.5009427	0.019252548	0.13865554	1.0	573	tags=22%, list=8%, signal=24%
CHUNG_BLISTER_CYTOTOXICITY_DN	CHUNG_BLISTER_CYTOTOXICITY_DN		22	0.5632427	1.5006601	0.027989822	0.13870591	1.0	127	tags=18%, list=2%, signal=18%
REACTOME_VOLTAGE_GATED_POTASSIUM_CHANNELS	REACTOME_VOLTAGE_GATED_POTASSIUM_CHANNELS		10	0.6842391	1.4998306	0.038011696	0.13946415	1.0	799	tags=40%, list=11%, signal=45%
VERRECCHIA_DELAYED_RESPONSE_TO_TGFB1	VERRECCHIA_DELAYED_RESPONSE_TO_TGFB1		26	0.54995763	1.4995375	0.03034134	0.13951837	1.0	1317	tags=42%, list=18%, signal=51%
GRAESSMANN_RESPONSE_TO_MC_AND_DOXORUBICIN_DN	GRAESSMANN_RESPONSE_TO_MC_AND_DOXORUBICIN_DN		432	0.40828055	1.4990265	0.0	0.13982263	1.0	2177	tags=38%, list=29%, signal=50%
WANG_ADIPOGENIC_GENES_REPRESSED_BY_SIRT1	WANG_ADIPOGENIC_GENES_REPRESSED_BY_SIRT1		16	0.60974514	1.4975135	0.044058744	0.1414577	1.0	712	tags=25%, list=10%, signal=28%
GRASEMANN_RETINOBLASTOMA_WITH_6P_AMPLIFICATION	GRASEMANN_RETINOBLASTOMA_WITH_6P_AMPLIFICATION		10	0.67743945	1.4960798	0.035868004	0.14297818	1.0	1388	tags=50%, list=19%, signal=61%
REACTOME_RNA_POL_I_TRANSCRIPTION	REACTOME_RNA_POL_I_TRANSCRIPTION		25	0.5557613	1.4959867	0.029908972	0.14277627	1.0	2316	tags=56%, list=31%, signal=81%
WORSCHECH_TUMOR_EVASION_AND_TOLEROGENICITY_UP	WORSCHECH_TUMOR_EVASION_AND_TOLEROGENICITY_UP		10	0.67230535	1.493132	0.05209841	0.1460452	1.0	2365	tags=80%, list=32%, signal=117%
BIOCARTA_G1_PATHWAY	BIOCARTA_G1_PATHWAY		19	0.5826549	1.4916626	0.040629096	0.14775449	1.0	1822	tags=53%, list=24%, signal=70%
MIPS_EIF3_COMPLEX	MIPS_EIF3_COMPLEX		11	0.66437054	1.4905089	0.03292181	0.14904521	1.0	2105	tags=82%, list=28%, signal=114%
HAHTOLA_MYCOSIS_FUNGOIDES_CD4_DN	HAHTOLA_MYCOSIS_FUNGOIDES_CD4_DN		104	0.44700047	1.4903988	0.0065075923	0.14885041	1.0	2333	tags=50%, list=31%, signal=72%
REACTOME_MRNA_3_END_PROCESSING	REACTOME_MRNA_3_END_PROCESSING		18	0.5887011	1.490308	0.036553524	0.1486134	1.0	2517	tags=72%, list=34%, signal=109%
JACKSON_DNMT1_TARGETS_UP	JACKSON_DNMT1_TARGETS_UP		57	0.47525764	1.4886245	0.02173913	0.15054677	1.0	1854	tags=40%, list=25%, signal=53%
DAIRKEE_CANCER_PRONE_RESPONSE_BPA_E2	DAIRKEE_CANCER_PRONE_RESPONSE_BPA_E2		84	0.45050737	1.4883145	0.013363029	0.15067445	1.0	1355	tags=27%, list=18%, signal=33%
GRADE_COLON_AND_RECTAL_CANCER_UP	GRADE_COLON_AND_RECTAL_CANCER_UP		197	0.41989154	1.487999	0.0	0.15075439	1.0	2084	tags=34%, list=28%, signal=46%
SMIRNOV_RESPONSE_TO_IR_2HR_DN	SMIRNOV_RESPONSE_TO_IR_2HR_DN		32	0.5317377	1.4879122	0.024783147	0.15054485	1.0	310	tags=16%, list=4%, signal=16%
DUTERTRE_ESTRADIOL_RESPONSE_6HR_UP	DUTERTRE_ESTRADIOL_RESPONSE_6HR_UP		132	0.43233353	1.4878812	0.010504202	0.15024346	1.0	1212	tags=29%, list=16%, signal=34%
MIPS_NCOR1_COMPLEX	MIPS_NCOR1_COMPLEX		10	0.65767795	1.487166	0.040229887	0.15091404	1.0	1386	tags=70%, list=19%, signal=86%
WEI_MYCN_TARGETS_WITH_E_BOX	WEI_MYCN_TARGETS_WITH_E_BOX		441	0.4048744	1.4858962	0.0	0.1523948	1.0	2322	tags=41%, list=31%, signal=56%
CHANG_CORE_SERUM_RESPONSE_UP	CHANG_CORE_SERUM_RESPONSE_UP		148	0.429347	1.4855561	0.0021030493	0.15252523	1.0	2320	tags=42%, list=31%, signal=60%
ZHAN_MULTIPLE_MYELOMA_MS_DN	ZHAN_MULTIPLE_MYELOMA_MS_DN		19	0.57482624	1.4852225	0.03911343	0.15266243	1.0	1819	tags=47%, list=24%, signal=63%
LEIN_CEREBELLUM_MARKERS	LEIN_CEREBELLUM_MARKERS		26	0.54654443	1.4846483	0.039240506	0.15309206	1.0	425	tags=23%, list=6%, signal=24%
REACTOME_ASSEMBLY_OF_THE_PRE_REPLICATIVE_COMPLEX	REACTOME_ASSEMBLY_OF_THE_PRE_REPLICATIVE_COMPLEX		51	0.48258796	1.4842644	0.024390243	0.1532921	1.0	755	tags=22%, list=10%, signal=24%
PENG_RAPAMYCIN_RESPONSE_UP	PENG_RAPAMYCIN_RESPONSE_UP		138	0.4277652	1.4831058	0.004219409	0.15447815	1.0	1705	tags=30%, list=23%, signal=39%
NIKOLSKY_MUTATED_AND_AMPLIFIED_IN_BREAST_CANCER	NIKOLSKY_MUTATED_AND_AMPLIFIED_IN_BREAST_CANCER		36	0.50930804	1.4817284	0.035714287	0.15611884	1.0	2051	tags=53%, list=28%, signal=73%
LI_DCP2_BOUND_MRNA	LI_DCP2_BOUND_MRNA		77	0.45452297	1.481599	0.016835017	0.15594445	1.0	2639	tags=47%, list=35%, signal=72%
REACTOME_SIGNALING_BY_NOTCH	REACTOME_SIGNALING_BY_NOTCH		60	0.46866816	1.4810728	0.01592719	0.156426	1.0	2466	tags=50%, list=33%, signal=74%
LIU_CMYB_TARGETS_UP	LIU_CMYB_TARGETS_UP		113	0.43973538	1.4804025	0.0054945056	0.15711248	1.0	793	tags=22%, list=11%, signal=24%
GENTILE_UV_RESPONSE_CLUSTER_D4	GENTILE_UV_RESPONSE_CLUSTER_D4		45	0.49041405	1.4782029	0.029797377	0.15989193	1.0	2807	tags=62%, list=38%, signal=99%
SCHLOSSER_MYC_AND_SERUM_RESPONSE_SYNERGY	SCHLOSSER_MYC_AND_SERUM_RESPONSE_SYNERGY		28	0.5323716	1.4780393	0.036082473	0.15979762	1.0	1355	tags=36%, list=18%, signal=44%
MIPS_SIN3_ING1B_COMPLEX_II	MIPS_SIN3_ING1B_COMPLEX_II		13	0.6341274	1.474999	0.03443526	0.16358256	1.0	873	tags=38%, list=12%, signal=43%
MIPS_TNF_ALPHA_NF_KAPPA_B_SIGNALING_COMPLEX_5	MIPS_TNF_ALPHA_NF_KAPPA_B_SIGNALING_COMPLEX_5		15	0.6078544	1.4749299	0.053370785	0.16334213	1.0	1548	tags=47%, list=21%, signal=59%
MATTIOLI_MGUS_VS_PCL	MATTIOLI_MGUS_VS_PCL		91	0.44510958	1.4743129	0.0044101435	0.1639399	1.0	1594	tags=43%, list=21%, signal=54%
MATZUK_SPERMATOCYTE	MATZUK_SPERMATOCYTE		33	0.5143456	1.4735079	0.030864198	0.16477218	1.0	520	tags=24%, list=7%, signal=26%
YAO_TEMPORAL_RESPONSE_TO_PROGESTERONE_CLUSTER_14	YAO_TEMPORAL_RESPONSE_TO_PROGESTERONE_CLUSTER_14		105	0.44506487	1.4734433	0.0076086954	0.16452529	1.0	1804	tags=31%, list=24%, signal=41%
KANNAN_TP53_TARGETS_DN	KANNAN_TP53_TARGETS_DN		16	0.59131515	1.4728383	0.05134788	0.16507721	1.0	661	tags=25%, list=9%, signal=27%
BIOCARTA_VDR_PATHWAY	BIOCARTA_VDR_PATHWAY		10	0.66758406	1.4727918	0.06303725	0.16478802	1.0	1685	tags=70%, list=23%, signal=90%
RIZ_ERYTHROID_DIFFERENTIATION_CCNE1	RIZ_ERYTHROID_DIFFERENTIATION_CCNE1		31	0.52076066	1.4700518	0.038314175	0.1685189	1.0	1036	tags=39%, list=14%, signal=45%
YEGNASUBRAMANIAN_PROSTATE_CANCER	YEGNASUBRAMANIAN_PROSTATE_CANCER		63	0.47074273	1.469509	0.013824885	0.1689827	1.0	898	tags=27%, list=12%, signal=30%
LIN_MELANOMA_COPY_NUMBER_UP	LIN_MELANOMA_COPY_NUMBER_UP		49	0.48437804	1.4694544	0.02347418	0.16870145	1.0	2498	tags=49%, list=34%, signal=73%
REACTOME_PRE_NOTCH_TRANSCRIPTION_AND_TRANSLATION	REACTOME_PRE_NOTCH_TRANSCRIPTION_AND_TRANSLATION		16	0.6039978	1.4684087	0.034528553	0.16982345	1.0	1591	tags=56%, list=21%, signal=71%
HOFFMANN_SMALL_PRE_BII_TO_IMMATURE_B_LYMPHOCYTE_DN	HOFFMANN_SMALL_PRE_BII_TO_IMMATURE_B_LYMPHOCYTE_DN		30	0.52006423	1.4677824	0.04125	0.17042059	1.0	501	tags=20%, list=7%, signal=21%
JIANG_HYPOXIA_CANCER	JIANG_HYPOXIA_CANCER		56	0.4793548	1.4675119	0.018390805	0.17045979	1.0	160	tags=11%, list=2%, signal=11%
BARIS_THYROID_CANCER_DN	BARIS_THYROID_CANCER_DN		43	0.49731487	1.4666525	0.023696683	0.17139693	1.0	2236	tags=58%, list=30%, signal=83%
AMUNDSON_GENOTOXIC_SIGNATURE	AMUNDSON_GENOTOXIC_SIGNATURE		60	0.46674165	1.4658005	0.021566402	0.17236893	1.0	1536	tags=42%, list=21%, signal=52%
REACTOME_RNA_POL_II_TRANSCRIPTION	REACTOME_RNA_POL_II_TRANSCRIPTION		68	0.45572427	1.4650067	0.022950819	0.17314449	1.0	2892	tags=63%, list=39%, signal=103%
MARTORIATI_MDM4_TARGETS_FETAL_LIVER_DN	MARTORIATI_MDM4_TARGETS_FETAL_LIVER_DN		323	0.4019952	1.464815	0.0	0.17304166	1.0	2139	tags=37%, list=29%, signal=50%
REACTOME_PROCESSING_OF_CAPPED_INTRONLESS_PRE_MRNA	REACTOME_PROCESSING_OF_CAPPED_INTRONLESS_PRE_MRNA		17	0.5908511	1.4647435	0.052702703	0.17279653	1.0	2165	tags=65%, list=29%, signal=91%
YOKOE_CANCER_TESTIS_ANTIGENS	YOKOE_CANCER_TESTIS_ANTIGENS		21	0.5616927	1.4645864	0.04296875	0.17264797	1.0	793	tags=24%, list=11%, signal=27%
MATZUK_MEIOTIC_AND_DNA_REPAIR	MATZUK_MEIOTIC_AND_DNA_REPAIR		15	0.59143746	1.4601345	0.05882353	0.17906138	1.0	112	tags=27%, list=2%, signal=27%
JAZAG_TGFB1_SIGNALING_DN	JAZAG_TGFB1_SIGNALING_DN		17	0.5803473	1.4587187	0.059840426	0.18082336	1.0	43	tags=12%, list=1%, signal=12%
ONO_FOXP3_TARGETS_DN	ONO_FOXP3_TARGETS_DN		18	0.58692575	1.4577198	0.036890645	0.18199596	1.0	1733	tags=50%, list=23%, signal=65%
CREIGHTON_ENDOCRINE_THERAPY_RESISTANCE_1	CREIGHTON_ENDOCRINE_THERAPY_RESISTANCE_1		289	0.40401086	1.4570957	0.0	0.18250354	1.0	1450	tags=27%, list=19%, signal=32%
ST_FAS_SIGNALING_PATHWAY	ST_FAS_SIGNALING_PATHWAY		40	0.48819286	1.4567124	0.025149701	0.1827734	1.0	1696	tags=35%, list=23%, signal=45%
KRASNOSELSKAYA_ILF3_TARGETS_DN	KRASNOSELSKAYA_ILF3_TARGETS_DN		25	0.53658414	1.4529704	0.052493438	0.18842225	1.0	687	tags=36%, list=9%, signal=40%
LEE_RECENT_THYMIC_EMIGRANT	LEE_RECENT_THYMIC_EMIGRANT		102	0.4320354	1.4528518	0.01523395	0.18822002	1.0	2593	tags=54%, list=35%, signal=82%
CORRE_MULTIPLE_MYELOMA_DN	CORRE_MULTIPLE_MYELOMA_DN		29	0.5181494	1.4504381	0.036036037	0.19167507	1.0	912	tags=24%, list=12%, signal=27%
DAUER_STAT3_TARGETS_DN	DAUER_STAT3_TARGETS_DN		30	0.51644677	1.4476415	0.03892944	0.19582826	1.0	993	tags=40%, list=13%, signal=46%
BASSO_B_LYMPHOCYTE_NETWORK	BASSO_B_LYMPHOCYTE_NETWORK		112	0.4272118	1.4462686	0.010787486	0.19773577	1.0	823	tags=18%, list=11%, signal=20%
REACTOME_METABOLISM_OF_NUCLEOTIDES	REACTOME_METABOLISM_OF_NUCLEOTIDES		44	0.47935346	1.4460939	0.026035503	0.19764236	1.0	1505	tags=34%, list=20%, signal=42%
REACTOME_APC_C_CDH1_MEDIATED_DEGRADATION_OF_CDC20_AND_OTHER_APC_C_CDH1_TARGETED_PROTEINS_IN_LATE_MITOSIS_EARLY_G1	REACTOME_APC_C_CDH1_MEDIATED_DEGRADATION_OF_CDC20_AND_OTHER_APC_C_CDH1_TARGETED_PROTEINS_IN_LATE_MITOSIS_EARLY_G1		53	0.46964094	1.4460804	0.03436019	0.19727275	1.0	372	tags=13%, list=5%, signal=14%
GAJATE_RESPONSE_TO_TRABECTEDIN_DN	GAJATE_RESPONSE_TO_TRABECTEDIN_DN		15	0.59041744	1.4450103	0.043715846	0.19861293	1.0	1649	tags=47%, list=22%, signal=60%
REACTOME_PRE_NOTCH_EXPRESSION_AND_PROCESSING	REACTOME_PRE_NOTCH_EXPRESSION_AND_PROCESSING		25	0.536074	1.4448403	0.052369077	0.19850446	1.0	1591	tags=44%, list=21%, signal=56%
MACLACHLAN_BRCA1_TARGETS_DN	MACLACHLAN_BRCA1_TARGETS_DN		11	0.63663095	1.4443867	0.056213018	0.1988398	1.0	709	tags=27%, list=10%, signal=30%
MIPS_BASC_COMPLEX	MIPS_BASC_COMPLEX		10	0.65967155	1.4440908	0.05203938	0.19891791	1.0	1185	tags=60%, list=16%, signal=71%
GOBERT_CORE_OLIGODENDROCYTE_DIFFERENTIATION	GOBERT_CORE_OLIGODENDROCYTE_DIFFERENTIATION		22	0.55614525	1.4438503	0.062176164	0.1989184	1.0	719	tags=27%, list=10%, signal=30%
HEIDENBLAD_AMPLICON_8Q24_UP	HEIDENBLAD_AMPLICON_8Q24_UP		20	0.55634946	1.4437454	0.05952381	0.19870311	1.0	1276	tags=30%, list=17%, signal=36%
JAIN_NFKB_SIGNALING	JAIN_NFKB_SIGNALING		49	0.4774993	1.4427862	0.036004648	0.19978544	1.0	2207	tags=47%, list=30%, signal=66%
WU_HBX_TARGETS_2_UP	WU_HBX_TARGETS_2_UP		16	0.5848047	1.4423118	0.0608931	0.20015323	1.0	289	tags=19%, list=4%, signal=19%
KIM_TIAL1_TARGETS	KIM_TIAL1_TARGETS		25	0.52519536	1.4393812	0.065104164	0.20474881	1.0	2097	tags=48%, list=28%, signal=67%
BRUINS_UVC_RESPONSE_EARLY_LATE	BRUINS_UVC_RESPONSE_EARLY_LATE		158	0.41435608	1.4367301	0.006204757	0.2088799	1.0	1909	tags=39%, list=26%, signal=51%
BIOCARTA_RELA_PATHWAY	BIOCARTA_RELA_PATHWAY		11	0.64260787	1.4350342	0.07234043	0.21140613	1.0	612	tags=36%, list=8%, signal=40%
GRABARCZYK_BCL11B_TARGETS_DN	GRABARCZYK_BCL11B_TARGETS_DN		31	0.5102949	1.4336439	0.05230386	0.21335138	1.0	787	tags=26%, list=11%, signal=29%
MOSERLE_IFNA_RESPONSE	MOSERLE_IFNA_RESPONSE		12	0.61229914	1.4330919	0.081232496	0.21391453	1.0	2409	tags=75%, list=32%, signal=111%
MARTENS_TRETINOIN_RESPONSE_DN	MARTENS_TRETINOIN_RESPONSE_DN		406	0.39458528	1.4320112	0.0	0.21541743	1.0	2386	tags=40%, list=32%, signal=55%
KYNG_RESPONSE_TO_H2O2_VIA_ERCC6_UP	KYNG_RESPONSE_TO_H2O2_VIA_ERCC6_UP		29	0.5156528	1.4318831	0.05977584	0.21517828	1.0	3190	tags=69%, list=43%, signal=120%
DANG_REGULATED_BY_MYC_UP	DANG_REGULATED_BY_MYC_UP		56	0.45881686	1.4317313	0.03850642	0.2150206	1.0	2097	tags=39%, list=28%, signal=54%
FARMER_BREAST_CANCER_CLUSTER_1	FARMER_BREAST_CANCER_CLUSTER_1		20	0.5493992	1.4313499	0.05484694	0.21522915	1.0	1117	tags=40%, list=15%, signal=47%
MATZUK_MALE_REPRODUCTION_SERTOLI	MATZUK_MALE_REPRODUCTION_SERTOLI		15	0.5941258	1.4308217	0.06955381	0.21571659	1.0	289	tags=20%, list=4%, signal=21%
GARGALOVIC_RESPONSE_TO_OXIDIZED_PHOSPHOLIPIDS_GREEN_DN	GARGALOVIC_RESPONSE_TO_OXIDIZED_PHOSPHOLIPIDS_GREEN_DN		11	0.61964726	1.4299891	0.07204611	0.21681789	1.0	1984	tags=64%, list=27%, signal=87%
YIH_RESPONSE_TO_ARSENITE_C3	YIH_RESPONSE_TO_ARSENITE_C3		27	0.52162814	1.4274545	0.0563204	0.22088112	1.0	1319	tags=30%, list=18%, signal=36%
HU_ANGIOGENESIS_DN	HU_ANGIOGENESIS_DN		34	0.4988355	1.4262679	0.057788946	0.22260928	1.0	2396	tags=44%, list=32%, signal=65%
CHEN_NEUROBLASTOMA_COPY_NUMBER_GAINS	CHEN_NEUROBLASTOMA_COPY_NUMBER_GAINS		30	0.50588477	1.4245703	0.057428215	0.2251692	1.0	1814	tags=43%, list=24%, signal=57%
HOLLEMAN_PREDNISOLONE_RESISTANCE_ALL_DN	HOLLEMAN_PREDNISOLONE_RESISTANCE_ALL_DN		19	0.5507804	1.4233104	0.08718626	0.22706951	1.0	2273	tags=63%, list=31%, signal=91%
HERNANDEZ_MITOTIC_ARREST_BY_DOCETAXEL_1_DN	HERNANDEZ_MITOTIC_ARREST_BY_DOCETAXEL_1_DN		28	0.51232916	1.42322	0.05078125	0.2268057	1.0	901	tags=32%, list=12%, signal=36%
MIKKELSEN_IPS_HCP_WITH_H3_UNMETHYLATED	MIKKELSEN_IPS_HCP_WITH_H3_UNMETHYLATED		11	0.63183177	1.423218	0.06469761	0.22637524	1.0	659	tags=36%, list=9%, signal=40%
SENESE_HDAC3_TARGETS_DN	SENESE_HDAC3_TARGETS_DN		264	0.39745548	1.4226161	0.0060728746	0.2269987	1.0	1635	tags=32%, list=22%, signal=40%
BROWNE_HCMV_INFECTION_48HR_UP	BROWNE_HCMV_INFECTION_48HR_UP		119	0.41216406	1.4225831	0.017951425	0.22662719	1.0	1462	tags=35%, list=20%, signal=43%
TANAKA_METHYLATED_IN_ESOPHAGEAL_CARCINOMA	TANAKA_METHYLATED_IN_ESOPHAGEAL_CARCINOMA		34	0.49017242	1.4219681	0.04368932	0.22727276	1.0	1630	tags=44%, list=22%, signal=56%
HEIDENBLAD_AMPLICON_8Q24_DN	HEIDENBLAD_AMPLICON_8Q24_DN		22	0.53796947	1.4200506	0.07206068	0.2303003	1.0	1404	tags=36%, list=19%, signal=45%
MARIADASON_RESPONSE_TO_CURCUMIN_SULINDAC_7	MARIADASON_RESPONSE_TO_CURCUMIN_SULINDAC_7		11	0.62587863	1.4190425	0.06891702	0.2316991	1.0	1887	tags=45%, list=25%, signal=61%
REACTOME_METABOLISM_OF_CARBOHYDRATES	REACTOME_METABOLISM_OF_CARBOHYDRATES		138	0.41017345	1.4181455	0.011578947	0.23284493	1.0	1771	tags=33%, list=24%, signal=42%
TORCHIA_TARGETS_OF_EWSR1_FLI1_FUSION_TOP20_DN	TORCHIA_TARGETS_OF_EWSR1_FLI1_FUSION_TOP20_DN		14	0.5937793	1.4174402	0.09554974	0.23372275	1.0	412	tags=21%, list=6%, signal=23%
GRANDVAUX_IFN_RESPONSE_NOT_VIA_IRF3	GRANDVAUX_IFN_RESPONSE_NOT_VIA_IRF3		10	0.6424096	1.4172993	0.065155804	0.23351781	1.0	1674	tags=40%, list=23%, signal=52%
CHIN_BREAST_CANCER_COPY_NUMBER_UP	CHIN_BREAST_CANCER_COPY_NUMBER_UP		15	0.5808733	1.4169652	0.07579787	0.23370387	1.0	1799	tags=53%, list=24%, signal=70%
JIANG_HYPOXIA_VIA_VHL	JIANG_HYPOXIA_VIA_VHL		22	0.53925997	1.4168655	0.054973822	0.23343332	1.0	2320	tags=55%, list=31%, signal=79%
MAGRANGEAS_MULTIPLE_MYELOMA_IGLL_VS_IGLK_UP	MAGRANGEAS_MULTIPLE_MYELOMA_IGLL_VS_IGLK_UP		17	0.56563497	1.4167207	0.07320442	0.23328675	1.0	1625	tags=41%, list=22%, signal=53%
HOLLEMAN_VINCRISTINE_RESISTANCE_B_ALL_UP	HOLLEMAN_VINCRISTINE_RESISTANCE_B_ALL_UP		30	0.5104735	1.4165868	0.055276383	0.23311707	1.0	965	tags=30%, list=13%, signal=34%
FOSTER_KDM1A_TARGETS_DN	FOSTER_KDM1A_TARGETS_DN		108	0.42198575	1.4163064	0.017075773	0.2332173	1.0	1680	tags=28%, list=23%, signal=35%
KEGG_RNA_DEGRADATION	KEGG_RNA_DEGRADATION		40	0.4740138	1.4162736	0.054151624	0.23284589	1.0	2889	tags=65%, list=39%, signal=106%
REACTOME_SYNTHESIS_OF_PIPS_AT_THE_GOLGI_MEMBRANE	REACTOME_SYNTHESIS_OF_PIPS_AT_THE_GOLGI_MEMBRANE		10	0.6326374	1.4154747	0.07250342	0.23390165	1.0	515	tags=30%, list=7%, signal=32%
KEGG_TYPE_II_DIABETES_MELLITUS	KEGG_TYPE_II_DIABETES_MELLITUS		22	0.54015887	1.4153303	0.056410257	0.23371623	1.0	644	tags=23%, list=9%, signal=25%
HEDENFALK_BREAST_CANCER_HEREDITARY_VS_SPORADIC	HEDENFALK_BREAST_CANCER_HEREDITARY_VS_SPORADIC		41	0.4739633	1.414851	0.054945055	0.23416813	1.0	1444	tags=24%, list=19%, signal=30%
CHANDRAN_METASTASIS_UP	CHANDRAN_METASTASIS_UP		102	0.41790417	1.4144433	0.02357985	0.23448037	1.0	2000	tags=33%, list=27%, signal=45%
NOJIMA_SFRP2_TARGETS_DN	NOJIMA_SFRP2_TARGETS_DN		19	0.5414422	1.4140335	0.074122235	0.23482293	1.0	1674	tags=47%, list=23%, signal=61%
REACTOME_METABOLISM_OF_RNA	REACTOME_METABOLISM_OF_RNA		211	0.39639977	1.4117559	0.0040899795	0.23877174	1.0	2941	tags=52%, list=40%, signal=83%
REACTOME_BIOSYNTHESIS_OF_THE_N_GLYCAN_PRECURSOR_DOLICHOL_LIPID_LINKED_OLIGOSACCHARIDE_LLO_AND_TRANSFER_TO_A_NASCENT_PROTEIN	REACTOME_BIOSYNTHESIS_OF_THE_N_GLYCAN_PRECURSOR_DOLICHOL_LIPID_LINKED_OLIGOSACCHARIDE_LLO_AND_TRANSFER_TO_A_NASCENT_PROTEIN		13	0.59709316	1.4102763	0.079943895	0.24115117	1.0	1375	tags=38%, list=18%, signal=47%
BOSCO_TH1_CYTOTOXIC_MODULE	BOSCO_TH1_CYTOTOXIC_MODULE		25	0.5183721	1.4087915	0.066492826	0.2435489	1.0	1873	tags=48%, list=25%, signal=64%
CHEN_HOXA5_TARGETS_9HR_DN	CHEN_HOXA5_TARGETS_9HR_DN		29	0.5034476	1.4078021	0.07063197	0.24500388	1.0	1358	tags=38%, list=18%, signal=46%
REACTOME_INFLUENZA_LIFE_CYCLE	REACTOME_INFLUENZA_LIFE_CYCLE		118	0.41903043	1.4069952	0.018065887	0.24612474	1.0	3712	tags=72%, list=50%, signal=142%
PID_HDAC_CLASSI_PATHWAY	PID_HDAC_CLASSI_PATHWAY		43	0.47464925	1.4064453	0.05596107	0.24669927	1.0	2494	tags=49%, list=34%, signal=73%
BIOCARTA_RB_PATHWAY	BIOCARTA_RB_PATHWAY		10	0.64744955	1.4060736	0.07909604	0.24693058	1.0	1556	tags=60%, list=21%, signal=76%
LEE_LIVER_CANCER_MYC_E2F1_UP	LEE_LIVER_CANCER_MYC_E2F1_UP		38	0.48286122	1.405781	0.05382775	0.24702406	1.0	589	tags=18%, list=8%, signal=20%
ROESSLER_LIVER_CANCER_METASTASIS_UP	ROESSLER_LIVER_CANCER_METASTASIS_UP		62	0.43812925	1.4051222	0.051136363	0.24788585	1.0	851	tags=23%, list=11%, signal=25%
HADDAD_T_LYMPHOCYTE_AND_NK_PROGENITOR_DN	HADDAD_T_LYMPHOCYTE_AND_NK_PROGENITOR_DN		42	0.47443065	1.403888	0.06338028	0.24986574	1.0	683	tags=21%, list=9%, signal=23%
JOHNSTONE_PARVB_TARGETS_2_DN	JOHNSTONE_PARVB_TARGETS_2_DN		197	0.39304292	1.4027605	0.0041237115	0.2516223	1.0	1848	tags=35%, list=25%, signal=45%
MIPS_55S_RIBOSOME_MITOCHONDRIAL	MIPS_55S_RIBOSOME_MITOCHONDRIAL		45	0.470435	1.4021682	0.050179213	0.25232992	1.0	3076	tags=60%, list=41%, signal=102%
NAGY_TFTC_COMPONENTS_HUMAN	NAGY_TFTC_COMPONENTS_HUMAN		12	0.6071328	1.400648	0.08005618	0.25486773	1.0	1034	tags=42%, list=14%, signal=48%
MIPS_WINAC_COMPLEX	MIPS_WINAC_COMPLEX		13	0.58404386	1.4000094	0.093444906	0.2556919	1.0	1763	tags=62%, list=24%, signal=81%
REACTOME_MRNA_SPLICING_MINOR_PATHWAY	REACTOME_MRNA_SPLICING_MINOR_PATHWAY		30	0.49913684	1.3999934	0.06905371	0.2552676	1.0	3464	tags=83%, list=47%, signal=155%
REACTOME_CLASS_B_2_SECRETIN_FAMILY_RECEPTORS	REACTOME_CLASS_B_2_SECRETIN_FAMILY_RECEPTORS		32	0.48665357	1.3997809	0.059193954	0.25522563	1.0	615	tags=22%, list=8%, signal=24%
PID_HIVNEFPATHWAY	PID_HIVNEFPATHWAY		19	0.5496222	1.3993337	0.08310992	0.25562945	1.0	1696	tags=47%, list=23%, signal=61%
KANG_CISPLATIN_RESISTANCE_UP	KANG_CISPLATIN_RESISTANCE_UP		17	0.5603695	1.3985515	0.080474935	0.25668868	1.0	1329	tags=41%, list=18%, signal=50%
REACTOME_DEADENYLATION_DEPENDENT_MRNA_DECAY	REACTOME_DEADENYLATION_DEPENDENT_MRNA_DECAY		32	0.49662307	1.3979234	0.063275434	0.25753114	1.0	2889	tags=69%, list=39%, signal=112%
COLLER_MYC_TARGETS_UP	COLLER_MYC_TARGETS_UP		21	0.530844	1.3975446	0.079896905	0.2578208	1.0	1783	tags=43%, list=24%, signal=56%
ELVIDGE_HIF1A_TARGETS_UP	ELVIDGE_HIF1A_TARGETS_UP		49	0.4592034	1.3968368	0.04465335	0.2587043	1.0	1831	tags=35%, list=25%, signal=46%
KEGG_UBIQUITIN_MEDIATED_PROTEOLYSIS	KEGG_UBIQUITIN_MEDIATED_PROTEOLYSIS		84	0.42610183	1.3957814	0.03076923	0.2602594	1.0	2843	tags=45%, list=38%, signal=72%
MIPS_EMERIN_COMPLEX_32	MIPS_EMERIN_COMPLEX_32		15	0.57244366	1.3948495	0.074074075	0.2616286	1.0	1733	tags=47%, list=23%, signal=61%
REACTOME_ORC1_REMOVAL_FROM_CHROMATIN	REACTOME_ORC1_REMOVAL_FROM_CHROMATIN		52	0.45285484	1.3935457	0.05074971	0.26374522	1.0	1090	tags=21%, list=15%, signal=25%
MIPS_BRM_SIN3A_HDAC_COMPLEX	MIPS_BRM_SIN3A_HDAC_COMPLEX		10	0.62765247	1.3928157	0.079658605	0.26466957	1.0	1763	tags=60%, list=24%, signal=79%
MIPS_EMERIN_COMPLEX_24	MIPS_EMERIN_COMPLEX_24		11	0.6022133	1.3917857	0.083798885	0.26623824	1.0	2081	tags=64%, list=28%, signal=88%
REACTOME_ACTIVATION_OF_RAC	REACTOME_ACTIVATION_OF_RAC		11	0.6068898	1.3915949	0.08045977	0.2661791	1.0	1216	tags=36%, list=16%, signal=43%
CREIGHTON_AKT1_SIGNALING_VIA_MTOR_UP	CREIGHTON_AKT1_SIGNALING_VIA_MTOR_UP		20	0.5356116	1.3909701	0.10741688	0.26698124	1.0	538	tags=15%, list=7%, signal=16%
MIPS_BRG1_SIN3A_COMPLEX	MIPS_BRG1_SIN3A_COMPLEX		11	0.6143173	1.3908314	0.09478022	0.2668166	1.0	1763	tags=55%, list=24%, signal=71%
REACTOME_LOSS_OF_NLP_FROM_MITOTIC_CENTROSOMES	REACTOME_LOSS_OF_NLP_FROM_MITOTIC_CENTROSOMES		35	0.4792546	1.3895866	0.07635468	0.2688575	1.0	2069	tags=40%, list=28%, signal=55%
BROWNE_HCMV_INFECTION_8HR_DN	BROWNE_HCMV_INFECTION_8HR_DN		31	0.4950163	1.3888191	0.07295597	0.27002987	1.0	391	tags=19%, list=5%, signal=20%
ZWANG_DOWN_BY_2ND_EGF_PULSE	ZWANG_DOWN_BY_2ND_EGF_PULSE		61	0.43913123	1.3887856	0.05299539	0.26962397	1.0	864	tags=21%, list=12%, signal=24%
WALLACE_JAK2_TARGETS_UP	WALLACE_JAK2_TARGETS_UP		21	0.52106166	1.3878884	0.08058124	0.27094623	1.0	2036	tags=52%, list=27%, signal=72%
WEIGEL_OXIDATIVE_STRESS_BY_HNE_AND_H2O2	WEIGEL_OXIDATIVE_STRESS_BY_HNE_AND_H2O2		29	0.49477118	1.3862327	0.07818411	0.27379158	1.0	848	tags=17%, list=11%, signal=19%
ROESSLER_LIVER_CANCER_METASTASIS_DN	ROESSLER_LIVER_CANCER_METASTASIS_DN		31	0.4886691	1.3856497	0.08468244	0.2745172	1.0	1133	tags=39%, list=15%, signal=45%
CHAUHAN_RESPONSE_TO_METHOXYESTRADIOL_UP	CHAUHAN_RESPONSE_TO_METHOXYESTRADIOL_UP		40	0.46706182	1.3845721	0.06553398	0.27629495	1.0	835	tags=15%, list=11%, signal=17%
LIU_COMMON_CANCER_GENES	LIU_COMMON_CANCER_GENES		44	0.4604194	1.380318	0.074029125	0.28442517	1.0	2137	tags=39%, list=29%, signal=54%
FARMER_BREAST_CANCER_CLUSTER_5	FARMER_BREAST_CANCER_CLUSTER_5		16	0.56300306	1.3792119	0.084791385	0.28627682	1.0	2487	tags=81%, list=33%, signal=122%
MCBRYAN_PUBERTAL_BREAST_6_7WK_DN	MCBRYAN_PUBERTAL_BREAST_6_7WK_DN		46	0.4554347	1.3785983	0.05437352	0.28715017	1.0	425	tags=17%, list=6%, signal=18%
SMITH_TERT_TARGETS_UP	SMITH_TERT_TARGETS_UP		114	0.40515345	1.3781129	0.02513089	0.2877996	1.0	1970	tags=33%, list=26%, signal=45%
MULLIGHAN_NPM1_MUTATED_SIGNATURE_2_UP	MULLIGHAN_NPM1_MUTATED_SIGNATURE_2_UP		90	0.41564217	1.3778001	0.04262295	0.28793523	1.0	927	tags=19%, list=12%, signal=21%
REACTOME_AMYLOIDS	REACTOME_AMYLOIDS		22	0.5174963	1.3770592	0.09643329	0.28899223	1.0	615	tags=27%, list=8%, signal=30%
CHICAS_RB1_TARGETS_SENESCENT	CHICAS_RB1_TARGETS_SENESCENT		335	0.3796931	1.3761059	0.004012036	0.2905708	1.0	1852	tags=36%, list=25%, signal=46%
REACTOME_SIGNALING_BY_NOTCH1	REACTOME_SIGNALING_BY_NOTCH1		42	0.46190208	1.3757206	0.07506053	0.29092106	1.0	2134	tags=43%, list=29%, signal=60%
LI_INDUCED_T_TO_NATURAL_KILLER_DN	LI_INDUCED_T_TO_NATURAL_KILLER_DN		65	0.43548572	1.3756348	0.055944055	0.2906092	1.0	2570	tags=46%, list=35%, signal=70%
NIELSEN_LEIOMYOSARCOMA_CNN1_UP	NIELSEN_LEIOMYOSARCOMA_CNN1_UP		11	0.6090176	1.3755383	0.11444921	0.2903056	1.0	1154	tags=45%, list=16%, signal=54%
REACTOME_YAP1_AND_WWTR1_TAZ_STIMULATED_GENE_EXPRESSION	REACTOME_YAP1_AND_WWTR1_TAZ_STIMULATED_GENE_EXPRESSION		11	0.6008897	1.3754741	0.112676054	0.28995997	1.0	1685	tags=55%, list=23%, signal=70%
KIM_MYCN_AMPLIFICATION_TARGETS_DN	KIM_MYCN_AMPLIFICATION_TARGETS_DN		45	0.4513788	1.3742342	0.06745562	0.29209018	1.0	1453	tags=31%, list=20%, signal=38%
MIPS_MEDIATOR_COMPLEX	MIPS_MEDIATOR_COMPLEX		18	0.547244	1.3740574	0.07277628	0.29197827	1.0	2632	tags=67%, list=35%, signal=103%
YORDY_RECIPROCAL_REGULATION_BY_ETS1_AND_SP100_DN	YORDY_RECIPROCAL_REGULATION_BY_ETS1_AND_SP100_DN		46	0.45004028	1.3734585	0.06175772	0.29278073	1.0	1889	tags=37%, list=25%, signal=49%
RASHI_RESPONSE_TO_IONIZING_RADIATION_4	RASHI_RESPONSE_TO_IONIZING_RADIATION_4		31	0.4833439	1.3734258	0.09195402	0.2923591	1.0	1255	tags=35%, list=17%, signal=43%
REACTOME_HIV_INFECTION	REACTOME_HIV_INFECTION		154	0.393359	1.3731778	0.025263159	0.2924049	1.0	2892	tags=49%, list=39%, signal=78%
REACTOME_PYRIMIDINE_METABOLISM	REACTOME_PYRIMIDINE_METABOLISM		13	0.58233386	1.372687	0.10349651	0.29298142	1.0	217	tags=23%, list=3%, signal=24%
DITTMER_PTHLH_TARGETS_UP	DITTMER_PTHLH_TARGETS_UP		95	0.40784055	1.3725103	0.03833516	0.29285195	1.0	1876	tags=31%, list=25%, signal=40%
PID_AJDISS_2PATHWAY	PID_AJDISS_2PATHWAY		29	0.49646837	1.3720719	0.07537688	0.2933236	1.0	2129	tags=62%, list=29%, signal=87%
MIPS_BAF_COMPLEX	MIPS_BAF_COMPLEX		11	0.6073134	1.3715476	0.10694444	0.29402202	1.0	1763	tags=45%, list=24%, signal=59%
GENTILE_RESPONSE_CLUSTER_D3	GENTILE_RESPONSE_CLUSTER_D3		49	0.44900692	1.3709538	0.077105574	0.2947927	1.0	2344	tags=55%, list=32%, signal=80%
GAZDA_DIAMOND_BLACKFAN_ANEMIA_PROGENITOR_DN	GAZDA_DIAMOND_BLACKFAN_ANEMIA_PROGENITOR_DN		46	0.45351857	1.370498	0.069129914	0.29527366	1.0	1449	tags=39%, list=19%, signal=48%
MARIADASON_REGULATED_BY_HISTONE_ACETYLATION_UP	MARIADASON_REGULATED_BY_HISTONE_ACETYLATION_UP		45	0.45574337	1.3702078	0.06440281	0.2953996	1.0	1802	tags=33%, list=24%, signal=44%
KENNY_CTNNB1_TARGETS_UP	KENNY_CTNNB1_TARGETS_UP		35	0.47910696	1.3701556	0.07317073	0.2950234	1.0	1591	tags=43%, list=21%, signal=54%
OZEN_MIR125B1_TARGETS	OZEN_MIR125B1_TARGETS		14	0.5713941	1.3698982	0.11586207	0.29513958	1.0	1825	tags=50%, list=25%, signal=66%
GALE_APL_WITH_FLT3_MUTATED_UP	GALE_APL_WITH_FLT3_MUTATED_UP		47	0.44644618	1.3698297	0.06595995	0.294761	1.0	2483	tags=53%, list=33%, signal=79%
THEODOROU_MAMMARY_TUMORIGENESIS	THEODOROU_MAMMARY_TUMORIGENESIS		12	0.59026015	1.3694702	0.10215054	0.29504722	1.0	1239	tags=42%, list=17%, signal=50%
SCHAEFFER_SOX9_TARGETS_IN_PROSTATE_DEVELOPMENT_DN	SCHAEFFER_SOX9_TARGETS_IN_PROSTATE_DEVELOPMENT_DN		29	0.48404858	1.3684742	0.08468244	0.2966947	1.0	1643	tags=34%, list=22%, signal=44%
MATSUDA_NATURAL_KILLER_DIFFERENTIATION	MATSUDA_NATURAL_KILLER_DIFFERENTIATION		253	0.37982547	1.3672318	0.005065856	0.29905382	1.0	1686	tags=30%, list=23%, signal=38%
MULLIGHAN_NPM1_MUTATED_SIGNATURE_1_UP	MULLIGHAN_NPM1_MUTATED_SIGNATURE_1_UP		164	0.39388528	1.3662169	0.016528925	0.30071077	1.0	1522	tags=27%, list=20%, signal=33%
VALK_AML_CLUSTER_2	VALK_AML_CLUSTER_2		17	0.5384422	1.3653481	0.102841675	0.30212107	1.0	688	tags=24%, list=9%, signal=26%
SCHLOSSER_SERUM_RESPONSE_AUGMENTED_BY_MYC	SCHLOSSER_SERUM_RESPONSE_AUGMENTED_BY_MYC		81	0.4206428	1.3650924	0.045707915	0.30222976	1.0	2551	tags=51%, list=34%, signal=76%
SESTO_RESPONSE_TO_UV_C7	SESTO_RESPONSE_TO_UV_C7		58	0.43112475	1.3635082	0.053837344	0.30522102	1.0	97	tags=10%, list=1%, signal=10%
SUZUKI_RESPONSE_TO_TSA	SUZUKI_RESPONSE_TO_TSA		13	0.58611965	1.3630315	0.10277778	0.3057517	1.0	1719	tags=62%, list=23%, signal=80%
MIPS_PBAF_COMPLEX	MIPS_PBAF_COMPLEX		10	0.6216423	1.362267	0.1083815	0.3069977	1.0	873	tags=30%, list=12%, signal=34%
VALK_AML_WITH_FLT3_ITD	VALK_AML_WITH_FLT3_ITD		23	0.51472735	1.3621175	0.10052219	0.30687785	1.0	178	tags=13%, list=2%, signal=13%
KOKKINAKIS_METHIONINE_DEPRIVATION_48HR_DN	KOKKINAKIS_METHIONINE_DEPRIVATION_48HR_DN		45	0.4528195	1.362027	0.07995227	0.30657047	1.0	2442	tags=53%, list=33%, signal=79%
CLASPER_LYMPHATIC_VESSELS_DURING_METASTASIS_DN	CLASPER_LYMPHATIC_VESSELS_DURING_METASTASIS_DN		26	0.5040308	1.3619705	0.09567497	0.30622438	1.0	1876	tags=58%, list=25%, signal=77%
CHEOK_RESPONSE_TO_MERCAPTOPURINE_UP	CHEOK_RESPONSE_TO_MERCAPTOPURINE_UP		10	0.6191431	1.3613017	0.114754096	0.30721924	1.0	2284	tags=60%, list=31%, signal=86%
RICKMAN_TUMOR_DIFFERENTIATED_WELL_VS_MODERATELY_UP	RICKMAN_TUMOR_DIFFERENTIATED_WELL_VS_MODERATELY_UP		47	0.45060956	1.3608302	0.052247874	0.3078034	1.0	542	tags=21%, list=7%, signal=23%
CHNG_MULTIPLE_MYELOMA_HYPERPLOID_UP	CHNG_MULTIPLE_MYELOMA_HYPERPLOID_UP		46	0.44739497	1.3605088	0.078638494	0.30801865	1.0	3433	tags=74%, list=46%, signal=136%
BIOCARTA_STATHMIN_PATHWAY	BIOCARTA_STATHMIN_PATHWAY		10	0.61193055	1.3597649	0.11908178	0.30922917	1.0	681	tags=30%, list=9%, signal=33%
BIOCARTA_MPR_PATHWAY	BIOCARTA_MPR_PATHWAY		25	0.4992918	1.3594025	0.103626944	0.30955708	1.0	52	tags=8%, list=1%, signal=8%
TURASHVILI_BREAST_LOBULAR_CARCINOMA_VS_LOBULAR_NORMAL_DN	TURASHVILI_BREAST_LOBULAR_CARCINOMA_VS_LOBULAR_NORMAL_DN		43	0.4583922	1.3588438	0.07451923	0.31033358	1.0	2493	tags=67%, list=34%, signal=101%
REACTOME_FANCONI_ANEMIA_PATHWAY	REACTOME_FANCONI_ANEMIA_PATHWAY		10	0.61058706	1.3582584	0.12535612	0.31117055	1.0	1185	tags=50%, list=16%, signal=59%
MARCHINI_TRABECTEDIN_RESISTANCE_DN	MARCHINI_TRABECTEDIN_RESISTANCE_DN		36	0.46582896	1.3576502	0.09202454	0.31193718	1.0	1484	tags=39%, list=20%, signal=48%
ZHANG_RESPONSE_TO_IKK_INHIBITOR_AND_TNF_DN	ZHANG_RESPONSE_TO_IKK_INHIBITOR_AND_TNF_DN		40	0.46101886	1.3574406	0.08523409	0.3118668	1.0	2534	tags=60%, list=34%, signal=91%
BAUS_TFF2_TARGETS_UP	BAUS_TFF2_TARGETS_UP		17	0.5365848	1.357405	0.111409396	0.31144914	1.0	755	tags=24%, list=10%, signal=26%
HIRSCH_CELLULAR_TRANSFORMATION_SIGNATURE_DN	HIRSCH_CELLULAR_TRANSFORMATION_SIGNATURE_DN		85	0.41298643	1.3572844	0.051054385	0.3112402	1.0	1694	tags=28%, list=23%, signal=36%
GAZIN_EPIGENETIC_SILENCING_BY_KRAS	GAZIN_EPIGENETIC_SILENCING_BY_KRAS		14	0.5545079	1.3561456	0.119463086	0.31334698	1.0	1538	tags=43%, list=21%, signal=54%
SMID_BREAST_CANCER_RELAPSE_IN_LUNG_UP	SMID_BREAST_CANCER_RELAPSE_IN_LUNG_UP		11	0.60276085	1.353987	0.11173975	0.31778276	1.0	813	tags=45%, list=11%, signal=51%
PID_WNT_NONCANONICAL_PATHWAY	PID_WNT_NONCANONICAL_PATHWAY		19	0.5369772	1.3535951	0.099866845	0.31812856	1.0	1542	tags=37%, list=21%, signal=46%
KEGG_RENAL_CELL_CARCINOMA	KEGG_RENAL_CELL_CARCINOMA		45	0.44761738	1.3530833	0.093380615	0.31877202	1.0	1216	tags=29%, list=16%, signal=34%
BONOME_OVARIAN_CANCER_POOR_SURVIVAL_UP	BONOME_OVARIAN_CANCER_POOR_SURVIVAL_UP		25	0.503201	1.3526732	0.09727626	0.31920707	1.0	1435	tags=44%, list=19%, signal=54%
MARIADASON_RESPONSE_TO_BUTYRATE_SULINDAC_6	MARIADASON_RESPONSE_TO_BUTYRATE_SULINDAC_6		25	0.49428397	1.3518907	0.088272385	0.32050017	1.0	1531	tags=36%, list=21%, signal=45%
MOROSETTI_FACIOSCAPULOHUMERAL_MUSCULAR_DISTROPHY_UP	MOROSETTI_FACIOSCAPULOHUMERAL_MUSCULAR_DISTROPHY_UP		13	0.5748195	1.3512492	0.11186903	0.3214777	1.0	2688	tags=77%, list=36%, signal=120%
VALK_AML_CLUSTER_3	VALK_AML_CLUSTER_3		19	0.5289397	1.3507342	0.09222662	0.3220922	1.0	378	tags=16%, list=5%, signal=17%
KRIEG_HYPOXIA_NOT_VIA_KDM3A	KRIEG_HYPOXIA_NOT_VIA_KDM3A		401	0.36987817	1.350566	0.003003003	0.32197407	1.0	1845	tags=30%, list=25%, signal=38%
VANHARANTA_UTERINE_FIBROID_UP	VANHARANTA_UTERINE_FIBROID_UP		31	0.48026526	1.3496733	0.10656753	0.32343218	1.0	1694	tags=48%, list=23%, signal=62%
KEGG_CHRONIC_MYELOID_LEUKEMIA	KEGG_CHRONIC_MYELOID_LEUKEMIA		46	0.45037487	1.3478645	0.06651109	0.32698172	1.0	2466	tags=48%, list=33%, signal=71%
KRIEG_HYPOXIA_VIA_KDM3A	KRIEG_HYPOXIA_VIA_KDM3A		26	0.48921835	1.3476601	0.114178166	0.3269551	1.0	568	tags=19%, list=8%, signal=21%
REACTOME_ACTIVATION_OF_THE_MRNA_UPON_BINDING_OF_THE_CAP_BINDING_COMPLEX_AND_EIFS_AND_SUBSEQUENT_BINDING_TO_43S	REACTOME_ACTIVATION_OF_THE_MRNA_UPON_BINDING_OF_THE_CAP_BINDING_COMPLEX_AND_EIFS_AND_SUBSEQUENT_BINDING_TO_43S		49	0.43857437	1.347264	0.10082063	0.3273861	1.0	3323	tags=67%, list=45%, signal=121%
HEDENFALK_BREAST_CANCER_BRACX_DN	HEDENFALK_BREAST_CANCER_BRACX_DN		13	0.580394	1.346353	0.107093185	0.32902405	1.0	1597	tags=46%, list=21%, signal=59%
REACTOME_DESTABILIZATION_OF_MRNA_BY_TRISTETRAPROLIN_TTP	REACTOME_DESTABILIZATION_OF_MRNA_BY_TRISTETRAPROLIN_TTP		13	0.57239616	1.3453479	0.125	0.33074307	1.0	2256	tags=62%, list=30%, signal=88%
KORKOLA_YOLK_SAC_TUMOR	KORKOLA_YOLK_SAC_TUMOR		28	0.4705438	1.3447455	0.09885932	0.33163303	1.0	1000	tags=39%, list=13%, signal=45%
REACTOME_TRNA_AMINOACYLATION	REACTOME_TRNA_AMINOACYLATION		31	0.47312298	1.344227	0.09765142	0.33237106	1.0	3274	tags=68%, list=44%, signal=121%
REACTOME_MYOGENESIS	REACTOME_MYOGENESIS		16	0.5472231	1.3442144	0.12087912	0.3318882	1.0	861	tags=25%, list=12%, signal=28%
BOYLAN_MULTIPLE_MYELOMA_C_UP	BOYLAN_MULTIPLE_MYELOMA_C_UP		24	0.4920292	1.3441253	0.09395109	0.33160272	1.0	1214	tags=29%, list=16%, signal=35%
ZHAN_V2_LATE_DIFFERENTIATION_GENES	ZHAN_V2_LATE_DIFFERENTIATION_GENES		37	0.4626183	1.3409588	0.08872902	0.33827096	1.0	463	tags=19%, list=6%, signal=20%
SILIGAN_TARGETS_OF_EWS_FLI1_FUSION_DN	SILIGAN_TARGETS_OF_EWS_FLI1_FUSION_DN		11	0.59211767	1.3392569	0.12780899	0.34183192	1.0	1432	tags=36%, list=19%, signal=45%
REACTOME_FORMATION_OF_THE_TERNARY_COMPLEX_AND_SUBSEQUENTLY_THE_43S_COMPLEX	REACTOME_FORMATION_OF_THE_TERNARY_COMPLEX_AND_SUBSEQUENTLY_THE_43S_COMPLEX		41	0.44644096	1.3390555	0.093023255	0.34174648	1.0	3323	tags=68%, list=45%, signal=123%
CHOW_RASSF1_TARGETS_UP	CHOW_RASSF1_TARGETS_UP		21	0.51064295	1.3386962	0.099871956	0.34204262	1.0	648	tags=19%, list=9%, signal=21%
FOURNIER_ACINAR_DEVELOPMENT_EARLY_UP	FOURNIER_ACINAR_DEVELOPMENT_EARLY_UP		18	0.5167439	1.3383	0.11749347	0.34246007	1.0	1228	tags=39%, list=17%, signal=46%
MOHANKUMAR_TLX1_TARGETS_UP	MOHANKUMAR_TLX1_TARGETS_UP		282	0.37131888	1.3379337	0.012158055	0.342779	1.0	1672	tags=27%, list=22%, signal=33%
REACTOME_NOTCH1_INTRACELLULAR_DOMAIN_REGULATES_TRANSCRIPTION	REACTOME_NOTCH1_INTRACELLULAR_DOMAIN_REGULATES_TRANSCRIPTION		32	0.47217327	1.3370917	0.118705034	0.34423843	1.0	1256	tags=31%, list=17%, signal=37%
FARMER_BREAST_CANCER_BASAL_VS_LULMINAL	FARMER_BREAST_CANCER_BASAL_VS_LULMINAL		218	0.3725028	1.336932	0.013224822	0.34408417	1.0	1609	tags=28%, list=22%, signal=34%
PEART_HDAC_PROLIFERATION_CLUSTER_DN	PEART_HDAC_PROLIFERATION_CLUSTER_DN		55	0.43729612	1.3364034	0.08158508	0.34478804	1.0	1750	tags=42%, list=24%, signal=54%
CAFFAREL_RESPONSE_TO_THC_24HR_5_UP	CAFFAREL_RESPONSE_TO_THC_24HR_5_UP		27	0.48222312	1.336055	0.08883249	0.34507933	1.0	1355	tags=22%, list=18%, signal=27%
ZHANG_RESPONSE_TO_CANTHARIDIN_DN	ZHANG_RESPONSE_TO_CANTHARIDIN_DN		54	0.4338206	1.3355091	0.07042254	0.34577718	1.0	2501	tags=50%, list=34%, signal=75%
ST_T_CELL_SIGNAL_TRANSDUCTION	ST_T_CELL_SIGNAL_TRANSDUCTION		24	0.49107552	1.3348718	0.11369509	0.34660494	1.0	1257	tags=29%, list=17%, signal=35%
BILD_E2F3_ONCOGENIC_SIGNATURE	BILD_E2F3_ONCOGENIC_SIGNATURE		120	0.39104402	1.3348298	0.054910243	0.3461658	1.0	1135	tags=23%, list=15%, signal=27%
REACTOME_ELONGATION_ARREST_AND_RECOVERY	REACTOME_ELONGATION_ARREST_AND_RECOVERY		24	0.4867543	1.3348024	0.124835745	0.34570357	1.0	3428	tags=75%, list=46%, signal=139%
PID_RAC1_REG_PATHWAY	PID_RAC1_REG_PATHWAY		21	0.5151901	1.3341528	0.1198946	0.34673712	1.0	1441	tags=29%, list=19%, signal=35%
BIOCARTA_ATM_PATHWAY	BIOCARTA_ATM_PATHWAY		12	0.5803569	1.3335321	0.11126374	0.34769204	1.0	1822	tags=67%, list=24%, signal=88%
WATANABE_COLON_CANCER_MSI_VS_MSS_DN	WATANABE_COLON_CANCER_MSI_VS_MSS_DN		32	0.48018196	1.3327672	0.09443726	0.34887695	1.0	636	tags=25%, list=9%, signal=27%
GENTILE_UV_RESPONSE_CLUSTER_D9	GENTILE_UV_RESPONSE_CLUSTER_D9		20	0.5185326	1.3327044	0.12516297	0.34848452	1.0	1214	tags=30%, list=16%, signal=36%
BROWNE_HCMV_INFECTION_14HR_UP	BROWNE_HCMV_INFECTION_14HR_UP		101	0.39714846	1.3326404	0.05798687	0.34810105	1.0	2342	tags=48%, list=31%, signal=68%
IVANOVA_HEMATOPOIESIS_INTERMEDIATE_PROGENITOR	IVANOVA_HEMATOPOIESIS_INTERMEDIATE_PROGENITOR		83	0.40486398	1.3323544	0.072527476	0.34828568	1.0	2701	tags=47%, list=36%, signal=73%
MIPS_NOP56P_ASSOCIATED_PRE_RRNA_COMPLEX	MIPS_NOP56P_ASSOCIATED_PRE_RRNA_COMPLEX		90	0.39936364	1.3320923	0.059145674	0.34841383	1.0	3954	tags=76%, list=53%, signal=159%
SCHLOSSER_MYC_TARGETS_REPRESSED_BY_SERUM	SCHLOSSER_MYC_TARGETS_REPRESSED_BY_SERUM		140	0.38484105	1.3317919	0.041009463	0.34862706	1.0	2364	tags=36%, list=32%, signal=52%
WANG_RESPONSE_TO_BEXAROTENE_DN	WANG_RESPONSE_TO_BEXAROTENE_DN		14	0.5530718	1.331401	0.12305516	0.3490364	1.0	209	tags=21%, list=3%, signal=22%
REACTOME_FORMATION_OF_RNA_POL_II_ELONGATION_COMPLEX_	REACTOME_FORMATION_OF_RNA_POL_II_ELONGATION_COMPLEX_		30	0.47823316	1.3311491	0.12315271	0.3491545	1.0	3428	tags=73%, list=46%, signal=135%
SARTIPY_BLUNTED_BY_INSULIN_RESISTANCE_DN	SARTIPY_BLUNTED_BY_INSULIN_RESISTANCE_DN		11	0.59437287	1.3307168	0.12872629	0.34961537	1.0	1640	tags=36%, list=22%, signal=47%
REACTOME_MITOCHONDRIAL_TRNA_AMINOACYLATION	REACTOME_MITOCHONDRIAL_TRNA_AMINOACYLATION		13	0.562518	1.3305038	0.13850416	0.34963077	1.0	2526	tags=69%, list=34%, signal=105%
SEIDEN_MET_SIGNALING	SEIDEN_MET_SIGNALING		18	0.5253816	1.3294927	0.12565444	0.35156378	1.0	1674	tags=44%, list=23%, signal=57%
LOPEZ_MBD_TARGETS_IMPRINTED_AND_X_LINKED	LOPEZ_MBD_TARGETS_IMPRINTED_AND_X_LINKED		13	0.5698264	1.3287954	0.14405595	0.35277963	1.0	1940	tags=46%, list=26%, signal=62%
CUI_TCF21_TARGETS_UP	CUI_TCF21_TARGETS_UP		24	0.492777	1.3283255	0.11311054	0.3533711	1.0	524	tags=21%, list=7%, signal=22%
MACLACHLAN_BRCA1_TARGETS_UP	MACLACHLAN_BRCA1_TARGETS_UP		18	0.5275289	1.3282777	0.13606341	0.35296407	1.0	2393	tags=50%, list=32%, signal=74%
KIM_MYC_AMPLIFICATION_TARGETS_UP	KIM_MYC_AMPLIFICATION_TARGETS_UP		112	0.3899484	1.327993	0.053418804	0.3530924	1.0	1043	tags=20%, list=14%, signal=23%
MORI_SMALL_PRE_BII_LYMPHOCYTE_DN	MORI_SMALL_PRE_BII_LYMPHOCYTE_DN		54	0.43012118	1.3277763	0.09741784	0.35305256	1.0	2221	tags=43%, list=30%, signal=60%
BURTON_ADIPOGENESIS_5	BURTON_ADIPOGENESIS_5		87	0.40239477	1.3277601	0.0523446	0.3525633	1.0	2250	tags=32%, list=30%, signal=46%
DE_YY1_TARGETS_DN	DE_YY1_TARGETS_DN		69	0.41398555	1.3271956	0.07771429	0.35349938	1.0	2047	tags=38%, list=28%, signal=52%
KEGG_AMINOACYL_TRNA_BIOSYNTHESIS	KEGG_AMINOACYL_TRNA_BIOSYNTHESIS		28	0.47925928	1.3261517	0.10786802	0.35550594	1.0	3274	tags=71%, list=44%, signal=127%
BIOCARTA_ARF_PATHWAY	BIOCARTA_ARF_PATHWAY		12	0.5792551	1.3260391	0.12678063	0.35522693	1.0	2025	tags=58%, list=27%, signal=80%
LIANG_SILENCED_BY_METHYLATION_2	LIANG_SILENCED_BY_METHYLATION_2		29	0.46881816	1.3247982	0.12706481	0.35767254	1.0	1370	tags=34%, list=18%, signal=42%
HAHTOLA_SEZARY_SYNDROM_DN	HAHTOLA_SEZARY_SYNDROM_DN		21	0.50247586	1.3247124	0.10817942	0.35736746	1.0	734	tags=24%, list=10%, signal=26%
ROZANOV_MMP14_CORRELATED	ROZANOV_MMP14_CORRELATED		10	0.58650815	1.3236243	0.13161659	0.35956123	1.0	2534	tags=70%, list=34%, signal=106%
MALONEY_RESPONSE_TO_17AAG_UP	MALONEY_RESPONSE_TO_17AAG_UP		29	0.47010744	1.3231984	0.11883692	0.36008394	1.0	1862	tags=38%, list=25%, signal=50%
HERNANDEZ_ABERRANT_MITOSIS_BY_DOCETACEL_2NM_DN	HERNANDEZ_ABERRANT_MITOSIS_BY_DOCETACEL_2NM_DN		15	0.54019815	1.323175	0.12975098	0.35963082	1.0	1376	tags=40%, list=18%, signal=49%
MOOTHA_GLYCOLYSIS	MOOTHA_GLYCOLYSIS		15	0.54828465	1.3231527	0.13077939	0.35917524	1.0	1333	tags=27%, list=18%, signal=32%
JI_RESPONSE_TO_FSH_DN	JI_RESPONSE_TO_FSH_DN		45	0.43889275	1.3226823	0.09580839	0.35974655	1.0	1948	tags=36%, list=26%, signal=48%
GROSS_HYPOXIA_VIA_ELK3_AND_HIF1A_DN	GROSS_HYPOXIA_VIA_ELK3_AND_HIF1A_DN		61	0.41785878	1.3220642	0.08275862	0.36072075	1.0	691	tags=18%, list=9%, signal=20%
BANDRES_RESPONSE_TO_CARMUSTIN_WITHOUT_MGMT_48HR_DN	BANDRES_RESPONSE_TO_CARMUSTIN_WITHOUT_MGMT_48HR_DN		20	0.5124461	1.3220204	0.1424767	0.36031556	1.0	1758	tags=55%, list=24%, signal=72%
KEGG_PURINE_METABOLISM	KEGG_PURINE_METABOLISM		87	0.4005952	1.3216821	0.0697928	0.3605773	1.0	1628	tags=33%, list=22%, signal=42%
BIOCARTA_IL7_PATHWAY	BIOCARTA_IL7_PATHWAY		11	0.5755268	1.3216531	0.16690043	0.36011508	1.0	1275	tags=45%, list=17%, signal=55%
MIPS_ARC_COMPLEX	MIPS_ARC_COMPLEX		10	0.59935254	1.3211213	0.12978142	0.36088416	1.0	2632	tags=80%, list=35%, signal=124%
DUAN_PRDM5_TARGETS	DUAN_PRDM5_TARGETS		33	0.45801666	1.3208469	0.10714286	0.3610354	1.0	1765	tags=33%, list=24%, signal=44%
CUI_GLUCOSE_DEPRIVATION	CUI_GLUCOSE_DEPRIVATION		39	0.44933695	1.3201749	0.08462455	0.3620416	1.0	271	tags=10%, list=4%, signal=11%
GROSS_HYPOXIA_VIA_HIF1A_UP	GROSS_HYPOXIA_VIA_HIF1A_UP		46	0.44110757	1.3199668	0.08837772	0.36198935	1.0	1846	tags=37%, list=25%, signal=49%
BROWNE_HCMV_INFECTION_14HR_DN	BROWNE_HCMV_INFECTION_14HR_DN		190	0.37122658	1.3190739	0.03409091	0.363639	1.0	1189	tags=21%, list=16%, signal=24%
ARACNE_MYCN-NETWORK	ARACNE_MYCN-NETWORK		34	0.4536333	1.3181992	0.12758201	0.36528456	1.0	1564	tags=35%, list=21%, signal=44%
NEMETH_INFLAMMATORY_RESPONSE_LPS_DN	NEMETH_INFLAMMATORY_RESPONSE_LPS_DN		18	0.51973724	1.3176154	0.12021136	0.36618975	1.0	1845	tags=44%, list=25%, signal=59%
DITTMER_PTHLH_TARGETS_DN	DITTMER_PTHLH_TARGETS_DN		64	0.40770623	1.3174875	0.08660508	0.36595708	1.0	1262	tags=23%, list=17%, signal=28%
ROYLANCE_BREAST_CANCER_16Q_COPY_NUMBER_UP	ROYLANCE_BREAST_CANCER_16Q_COPY_NUMBER_UP		23	0.49038833	1.3173552	0.13419355	0.3657765	1.0	1798	tags=35%, list=24%, signal=46%
COLDREN_GEFITINIB_RESISTANCE_UP	COLDREN_GEFITINIB_RESISTANCE_UP		49	0.43463176	1.3171802	0.09461078	0.36566845	1.0	2337	tags=49%, list=31%, signal=71%
BIOCARTA_FAS_PATHWAY	BIOCARTA_FAS_PATHWAY		18	0.5219574	1.316688	0.1263587	0.36641908	1.0	1590	tags=50%, list=21%, signal=63%
SHIN_B_CELL_LYMPHOMA_CLUSTER_8	SHIN_B_CELL_LYMPHOMA_CLUSTER_8		19	0.5171606	1.3162891	0.1313394	0.366882	1.0	245	tags=16%, list=3%, signal=16%
REACTOME_APOPTOSIS_INDUCED_DNA_FRAGMENTATION	REACTOME_APOPTOSIS_INDUCED_DNA_FRAGMENTATION		10	0.59707004	1.3161808	0.14327486	0.3666248	1.0	1002	tags=40%, list=13%, signal=46%
KEGG_GLYCOSAMINOGLYCAN_BIOSYNTHESIS_CHONDROITIN_SULFATE	KEGG_GLYCOSAMINOGLYCAN_BIOSYNTHESIS_CHONDROITIN_SULFATE		10	0.60948694	1.3155278	0.1401099	0.36766645	1.0	332	tags=20%, list=4%, signal=21%
MCBRYAN_PUBERTAL_BREAST_5_6WK_DN	MCBRYAN_PUBERTAL_BREAST_5_6WK_DN		87	0.39851046	1.3151474	0.06696428	0.36803883	1.0	1853	tags=36%, list=25%, signal=47%
PID_AR_PATHWAY	PID_AR_PATHWAY		32	0.4622898	1.313258	0.10240964	0.37212232	1.0	2506	tags=47%, list=34%, signal=70%
IVANOVA_HEMATOPOIESIS_LATE_PROGENITOR	IVANOVA_HEMATOPOIESIS_LATE_PROGENITOR		238	0.36448815	1.3124665	0.026342452	0.37347403	1.0	910	tags=18%, list=12%, signal=19%
MIPS_LARC_COMPLEX	MIPS_LARC_COMPLEX		15	0.54627347	1.3122588	0.15135135	0.37348452	1.0	2670	tags=67%, list=36%, signal=104%
LABBE_TGFB1_TARGETS_DN	LABBE_TGFB1_TARGETS_DN		48	0.4260458	1.3121189	0.102625296	0.3732852	1.0	253	tags=13%, list=3%, signal=13%
CHIARADONNA_NEOPLASTIC_TRANSFORMATION_CDC25_UP	CHIARADONNA_NEOPLASTIC_TRANSFORMATION_CDC25_UP		77	0.40569523	1.3117278	0.07991121	0.37369674	1.0	2380	tags=43%, list=32%, signal=62%
BIOCARTA_NTHI_PATHWAY	BIOCARTA_NTHI_PATHWAY		15	0.5458102	1.3104361	0.13691275	0.37636805	1.0	612	tags=33%, list=8%, signal=36%
CAFFAREL_RESPONSE_TO_THC_8HR_5_UP	CAFFAREL_RESPONSE_TO_THC_8HR_5_UP		12	0.56525147	1.3097084	0.13986014	0.37764522	1.0	2711	tags=75%, list=36%, signal=118%
BIOCARTA_CCR3_PATHWAY	BIOCARTA_CCR3_PATHWAY		15	0.5345364	1.3087763	0.13661203	0.37949142	1.0	1319	tags=27%, list=18%, signal=32%
PID_CMYB_PATHWAY	PID_CMYB_PATHWAY		46	0.42917067	1.3081832	0.116883114	0.38039514	1.0	929	tags=17%, list=12%, signal=20%
KOINUMA_COLON_CANCER_MSI_DN	KOINUMA_COLON_CANCER_MSI_DN		10	0.5865645	1.3079209	0.13131313	0.3805076	1.0	1483	tags=50%, list=20%, signal=62%
BYSTROEM_CORRELATED_WITH_IL5_DN	BYSTROEM_CORRELATED_WITH_IL5_DN		42	0.43529007	1.3075553	0.10469314	0.3809275	1.0	710	tags=12%, list=10%, signal=13%
MIPS_ANTI_HDAC2_COMPLEX	MIPS_ANTI_HDAC2_COMPLEX		13	0.560967	1.3068558	0.14538044	0.38212183	1.0	1668	tags=46%, list=22%, signal=59%
DASU_IL6_SIGNALING_UP	DASU_IL6_SIGNALING_UP		37	0.4492012	1.3061355	0.10909091	0.38337317	1.0	1355	tags=32%, list=18%, signal=39%
LEE_TARGETS_OF_PTCH1_AND_SUFU_DN	LEE_TARGETS_OF_PTCH1_AND_SUFU_DN		29	0.46578538	1.3059022	0.1370869	0.38339758	1.0	1765	tags=52%, list=24%, signal=68%
BURTON_ADIPOGENESIS_12	BURTON_ADIPOGENESIS_12		17	0.52354914	1.305643	0.16756757	0.3835117	1.0	2150	tags=53%, list=29%, signal=74%
VALK_AML_WITH_EVI1	VALK_AML_WITH_EVI1		15	0.54329324	1.3042213	0.16419919	0.38658392	1.0	2357	tags=53%, list=32%, signal=78%
TIEN_INTESTINE_PROBIOTICS_6HR_DN	TIEN_INTESTINE_PROBIOTICS_6HR_DN		134	0.3777598	1.3041179	0.056603774	0.38629913	1.0	1831	tags=30%, list=25%, signal=39%
LEE_CALORIE_RESTRICTION_NEOCORTEX_DN	LEE_CALORIE_RESTRICTION_NEOCORTEX_DN		59	0.41419643	1.3034691	0.088737205	0.38746485	1.0	1229	tags=20%, list=17%, signal=24%
MANN_RESPONSE_TO_AMIFOSTINE_UP	MANN_RESPONSE_TO_AMIFOSTINE_UP		15	0.5311802	1.3016812	0.16288385	0.39132968	1.0	1351	tags=40%, list=18%, signal=49%
ZHOU_INFLAMMATORY_RESPONSE_LIVE_DN	ZHOU_INFLAMMATORY_RESPONSE_LIVE_DN		148	0.37161222	1.3006347	0.037775446	0.3935289	1.0	2401	tags=41%, list=32%, signal=60%
MIPS_BRM_SIN3A_COMPLEX	MIPS_BRM_SIN3A_COMPLEX		12	0.55630934	1.3002237	0.1615599	0.3940654	1.0	1763	tags=50%, list=24%, signal=65%
SPIELMAN_LYMPHOBLAST_EUROPEAN_VS_ASIAN_UP	SPIELMAN_LYMPHOBLAST_EUROPEAN_VS_ASIAN_UP		397	0.35737005	1.2995555	0.008024072	0.39519566	1.0	2275	tags=33%, list=31%, signal=45%
REACTOME_HOST_INTERACTIONS_OF_HIV_FACTORS	REACTOME_HOST_INTERACTIONS_OF_HIV_FACTORS		102	0.39023137	1.2989596	0.06903991	0.39613008	1.0	1771	tags=27%, list=24%, signal=36%
BORLAK_LIVER_CANCER_EGF_UP	BORLAK_LIVER_CANCER_EGF_UP		43	0.43043447	1.298676	0.12009513	0.39632586	1.0	683	tags=21%, list=9%, signal=23%
MIPS_SNF2H_COHESIN_NURD_COMPLEX	MIPS_SNF2H_COHESIN_NURD_COMPLEX		13	0.54811597	1.2982141	0.1624161	0.39697972	1.0	3138	tags=85%, list=42%, signal=146%
HOSHIDA_LIVER_CANCER_SUBCLASS_S2	HOSHIDA_LIVER_CANCER_SUBCLASS_S2		93	0.3837773	1.2975609	0.078774616	0.39807692	1.0	2349	tags=41%, list=32%, signal=59%
BOQUEST_STEM_CELL_UP	BOQUEST_STEM_CELL_UP		167	0.3706927	1.297142	0.049060542	0.39856172	1.0	1489	tags=35%, list=20%, signal=42%
PID_HNF3APATHWAY	PID_HNF3APATHWAY		22	0.49086866	1.2966708	0.13385826	0.39920524	1.0	591	tags=23%, list=8%, signal=25%
KEEN_RESPONSE_TO_ROSIGLITAZONE_UP	KEEN_RESPONSE_TO_ROSIGLITAZONE_UP		21	0.4908357	1.296623	0.152	0.39881313	1.0	404	tags=14%, list=5%, signal=15%
KUROKAWA_LIVER_CANCER_CHEMOTHERAPY_DN	KUROKAWA_LIVER_CANCER_CHEMOTHERAPY_DN		26	0.47937667	1.2942759	0.119700745	0.4042117	1.0	308	tags=15%, list=4%, signal=16%
LI_LUNG_CANCER	LI_LUNG_CANCER		29	0.45945296	1.2941452	0.15220127	0.40395534	1.0	677	tags=17%, list=9%, signal=19%
ENK_UV_RESPONSE_KERATINOCYTE_DN	ENK_UV_RESPONSE_KERATINOCYTE_DN		399	0.35134003	1.293072	0.0070564514	0.40619767	1.0	2277	tags=36%, list=31%, signal=50%
PID_HIF2PATHWAY	PID_HIF2PATHWAY		20	0.4961128	1.2925988	0.15167095	0.40686524	1.0	940	tags=30%, list=13%, signal=34%
BIOCARTA_TNFR1_PATHWAY	BIOCARTA_TNFR1_PATHWAY		19	0.49872017	1.2925072	0.15665796	0.4065589	1.0	1696	tags=47%, list=23%, signal=61%
RAY_TARGETS_OF_P210_BCR_ABL_FUSION_UP	RAY_TARGETS_OF_P210_BCR_ABL_FUSION_UP		12	0.5548412	1.2917813	0.13783404	0.40802497	1.0	651	tags=33%, list=9%, signal=36%
LIU_IL13_PRIMING_MODEL	LIU_IL13_PRIMING_MODEL		10	0.5813908	1.2916772	0.1529745	0.40771878	1.0	1703	tags=60%, list=23%, signal=78%
BIOCARTA_CLASSIC_PATHWAY	BIOCARTA_CLASSIC_PATHWAY		11	0.5725833	1.2914597	0.17408907	0.40777555	1.0	587	tags=27%, list=8%, signal=30%
KEGG_RNA_POLYMERASE	KEGG_RNA_POLYMERASE		19	0.4963462	1.2910149	0.14848883	0.4084005	1.0	3428	tags=79%, list=46%, signal=146%
BIOCARTA_P27_PATHWAY	BIOCARTA_P27_PATHWAY		12	0.5558821	1.2909455	0.16869096	0.40803963	1.0	1591	tags=42%, list=21%, signal=53%
ZHAN_MULTIPLE_MYELOMA_CD1_AND_CD2_UP	ZHAN_MULTIPLE_MYELOMA_CD1_AND_CD2_UP		39	0.44442746	1.2893769	0.12393682	0.4115685	1.0	1826	tags=41%, list=25%, signal=54%
JAZAERI_BREAST_CANCER_BRCA1_VS_BRCA2_UP	JAZAERI_BREAST_CANCER_BRCA1_VS_BRCA2_UP		34	0.44479096	1.288658	0.14088051	0.41294488	1.0	2285	tags=32%, list=31%, signal=46%
KOBAYASHI_EGFR_SIGNALING_24HR_UP	KOBAYASHI_EGFR_SIGNALING_24HR_UP		74	0.39672405	1.2875878	0.10136674	0.4150608	1.0	1288	tags=27%, list=17%, signal=32%
BERENJENO_TRANSFORMED_BY_RHOA_REVERSIBLY_DN	BERENJENO_TRANSFORMED_BY_RHOA_REVERSIBLY_DN		21	0.4940741	1.2869569	0.15561225	0.41614106	1.0	1415	tags=33%, list=19%, signal=41%
LASTOWSKA_NEUROBLASTOMA_COPY_NUMBER_UP	LASTOWSKA_NEUROBLASTOMA_COPY_NUMBER_UP		98	0.38895935	1.2867347	0.08760684	0.4161606	1.0	918	tags=19%, list=12%, signal=22%
LINDGREN_BLADDER_CANCER_WITH_LOH_IN_CHR9Q	LINDGREN_BLADDER_CANCER_WITH_LOH_IN_CHR9Q		67	0.40499943	1.2858654	0.08220721	0.41788062	1.0	2585	tags=48%, list=35%, signal=73%
RAMALHO_STEMNESS_UP	RAMALHO_STEMNESS_UP		139	0.37215889	1.2854866	0.06533193	0.41832548	1.0	2818	tags=47%, list=38%, signal=75%
HEDENFALK_BREAST_CANCER_BRCA1_VS_BRCA2	HEDENFALK_BREAST_CANCER_BRCA1_VS_BRCA2		121	0.3754726	1.2848592	0.08137045	0.41939792	1.0	1563	tags=26%, list=21%, signal=32%
REACTOME_3_UTR_MEDIATED_TRANSLATIONAL_REGULATION	REACTOME_3_UTR_MEDIATED_TRANSLATIONAL_REGULATION		92	0.38309187	1.2833982	0.09269357	0.42260063	1.0	4061	tags=84%, list=55%, signal=182%
NOUZOVA_METHYLATED_IN_APL	NOUZOVA_METHYLATED_IN_APL		21	0.4849566	1.2819313	0.14158164	0.42593235	1.0	680	tags=29%, list=9%, signal=31%
ENK_UV_RESPONSE_EPIDERMIS_UP	ENK_UV_RESPONSE_EPIDERMIS_UP		199	0.36187902	1.2795208	0.029958678	0.43183672	1.0	1796	tags=31%, list=24%, signal=40%
BIOCARTA_HIVNEF_PATHWAY	BIOCARTA_HIVNEF_PATHWAY		34	0.45318636	1.2790984	0.14375	0.43241754	1.0	1696	tags=38%, list=23%, signal=49%
BIOCARTA_MAPK_PATHWAY	BIOCARTA_MAPK_PATHWAY		56	0.4040605	1.278743	0.12282734	0.43277776	1.0	2046	tags=38%, list=28%, signal=51%
ZHAN_MULTIPLE_MYELOMA_UP	ZHAN_MULTIPLE_MYELOMA_UP		50	0.41703287	1.2778486	0.11981567	0.4346544	1.0	2532	tags=50%, list=34%, signal=75%
SMID_BREAST_CANCER_RELAPSE_IN_BRAIN_UP	SMID_BREAST_CANCER_RELAPSE_IN_BRAIN_UP		19	0.4973832	1.2764082	0.16778524	0.43801618	1.0	271	tags=21%, list=4%, signal=22%
ARACNE_CCND1-NETWORK	ARACNE_CCND1-NETWORK		20	0.49131215	1.275935	0.17454068	0.43873355	1.0	3194	tags=80%, list=43%, signal=140%
WANG_CLIM2_TARGETS_UP	WANG_CLIM2_TARGETS_UP		122	0.3713625	1.2748321	0.073015876	0.44123077	1.0	2508	tags=43%, list=34%, signal=64%
MEISSNER_BRAIN_HCP_WITH_H3K4ME3_AND_H3K27ME3	MEISSNER_BRAIN_HCP_WITH_H3K4ME3_AND_H3K27ME3		352	0.35120887	1.2734329	0.019076305	0.4444085	1.0	1448	tags=27%, list=19%, signal=32%
MULLIGHAN_NPM1_MUTATED_SIGNATURE_2_DN	MULLIGHAN_NPM1_MUTATED_SIGNATURE_2_DN		57	0.41032326	1.2730427	0.12556562	0.44488755	1.0	2082	tags=37%, list=28%, signal=51%
BROWNE_HCMV_INFECTION_10HR_DN	BROWNE_HCMV_INFECTION_10HR_DN		40	0.43302226	1.2729679	0.12664278	0.4445138	1.0	1039	tags=33%, list=14%, signal=38%
BROWNE_HCMV_INFECTION_10HR_UP	BROWNE_HCMV_INFECTION_10HR_UP		66	0.40309265	1.2721756	0.10960452	0.44609705	1.0	1160	tags=27%, list=16%, signal=32%
MARZEC_IL2_SIGNALING_DN	MARZEC_IL2_SIGNALING_DN		20	0.49371058	1.272033	0.1591203	0.44588283	1.0	2747	tags=70%, list=37%, signal=111%
BLALOCK_ALZHEIMERS_DISEASE_INCIPIENT_UP	BLALOCK_ALZHEIMERS_DISEASE_INCIPIENT_UP		249	0.35456184	1.2718405	0.04036327	0.4458478	1.0	2214	tags=41%, list=30%, signal=57%
HUANG_GATA2_TARGETS_DN	HUANG_GATA2_TARGETS_DN		47	0.4217075	1.2716258	0.13636364	0.44584194	1.0	1961	tags=45%, list=26%, signal=60%
VANASSE_BCL2_TARGETS_UP	VANASSE_BCL2_TARGETS_UP		20	0.49528122	1.2709876	0.16025642	0.4470557	1.0	830	tags=25%, list=11%, signal=28%
MIPS_39S_RIBOSOMAL_SUBUNIT_MITOCHONDRIAL	MIPS_39S_RIBOSOMAL_SUBUNIT_MITOCHONDRIAL		25	0.46617296	1.2705473	0.16709511	0.44762954	1.0	3533	tags=80%, list=47%, signal=152%
BERTUCCI_MEDULLARY_VS_DUCTAL_BREAST_CANCER_UP	BERTUCCI_MEDULLARY_VS_DUCTAL_BREAST_CANCER_UP		101	0.3828733	1.2703787	0.0867679	0.4475211	1.0	1424	tags=26%, list=19%, signal=31%
PID_WNT_CANONICAL_PATHWAY	PID_WNT_CANONICAL_PATHWAY		10	0.5664142	1.2696164	0.18014185	0.44903213	1.0	1317	tags=30%, list=18%, signal=36%
REACTOME_FORMATION_OF_THE_HIV1_EARLY_ELONGATION_COMPLEX	REACTOME_FORMATION_OF_THE_HIV1_EARLY_ELONGATION_COMPLEX		24	0.47731838	1.26957	0.15782829	0.4485779	1.0	3554	tags=79%, list=48%, signal=151%
KANG_GIST_WITH_PDGFRA_UP	KANG_GIST_WITH_PDGFRA_UP		32	0.45084184	1.2683136	0.14919852	0.45149824	1.0	1157	tags=34%, list=16%, signal=41%
BOWIE_RESPONSE_TO_TAMOXIFEN	BOWIE_RESPONSE_TO_TAMOXIFEN		10	0.5673926	1.268135	0.1938326	0.45142534	1.0	2593	tags=60%, list=35%, signal=92%
HADDAD_B_LYMPHOCYTE_PROGENITOR	HADDAD_B_LYMPHOCYTE_PROGENITOR		187	0.3600253	1.2681028	0.049586777	0.45091352	1.0	1724	tags=33%, list=23%, signal=41%
MULLIGHAN_NPM1_SIGNATURE_3_UP	MULLIGHAN_NPM1_SIGNATURE_3_UP		211	0.3547441	1.267784	0.06300813	0.4511303	1.0	1522	tags=25%, list=20%, signal=30%
OSMAN_BLADDER_CANCER_DN	OSMAN_BLADDER_CANCER_DN		239	0.35185322	1.2669972	0.04781282	0.45278946	1.0	2316	tags=37%, list=31%, signal=52%
MA_PITUITARY_FETAL_VS_ADULT_UP	MA_PITUITARY_FETAL_VS_ADULT_UP		20	0.477646	1.2655396	0.1730013	0.45617026	1.0	1954	tags=40%, list=26%, signal=54%
RIZ_ERYTHROID_DIFFERENTIATION_HBZ	RIZ_ERYTHROID_DIFFERENTIATION_HBZ		20	0.49482924	1.265304	0.1856764	0.4562542	1.0	2193	tags=60%, list=29%, signal=85%
REACTOME_DESTABILIZATION_OF_MRNA_BY_BRF1	REACTOME_DESTABILIZATION_OF_MRNA_BY_BRF1		12	0.5545918	1.2651685	0.1717033	0.4560278	1.0	2256	tags=58%, list=30%, signal=84%
REACTOME_THE_ROLE_OF_NEF_IN_HIV1_REPLICATION_AND_DISEASE_PATHOGENESIS	REACTOME_THE_ROLE_OF_NEF_IN_HIV1_REPLICATION_AND_DISEASE_PATHOGENESIS		18	0.49791303	1.2651669	0.16137566	0.45544863	1.0	1275	tags=28%, list=17%, signal=33%
STEIN_ESRRA_TARGETS_DN	STEIN_ESRRA_TARGETS_DN		79	0.3856716	1.264981	0.10898876	0.455363	1.0	1215	tags=28%, list=16%, signal=33%
BIOCARTA_BARR_MAPK_PATHWAY	BIOCARTA_BARR_MAPK_PATHWAY		10	0.57249266	1.2647622	0.19148937	0.45543846	1.0	832	tags=20%, list=11%, signal=22%
HASLINGER_B_CLL_WITH_CHROMOSOME_12_TRISOMY	HASLINGER_B_CLL_WITH_CHROMOSOME_12_TRISOMY		16	0.5066186	1.2637937	0.19346406	0.4575775	1.0	2905	tags=63%, list=39%, signal=102%
SAKAI_TUMOR_INFILTRATING_MONOCYTES_DN	SAKAI_TUMOR_INFILTRATING_MONOCYTES_DN		61	0.40209723	1.2637312	0.12342857	0.45718926	1.0	2245	tags=38%, list=30%, signal=54%
LASTOWSKA_NEUROBLASTOMA_COPY_NUMBER_DN	LASTOWSKA_NEUROBLASTOMA_COPY_NUMBER_DN		424	0.34326705	1.2628043	0.015	0.45914495	1.0	2131	tags=34%, list=29%, signal=45%
VANTVEER_BREAST_CANCER_ESR1_DN	VANTVEER_BREAST_CANCER_ESR1_DN		137	0.36409932	1.2601554	0.09033614	0.46585324	1.0	1253	tags=21%, list=17%, signal=25%
ZHENG_FOXP3_TARGETS_IN_T_LYMPHOCYTE_DN	ZHENG_FOXP3_TARGETS_IN_T_LYMPHOCYTE_DN		21	0.47907686	1.259754	0.17631578	0.4663933	1.0	458	tags=19%, list=6%, signal=20%
GENTILE_UV_HIGH_DOSE_DN	GENTILE_UV_HIGH_DOSE_DN		246	0.35180125	1.2593389	0.04863222	0.4669851	1.0	2350	tags=40%, list=32%, signal=57%
CHEOK_RESPONSE_TO_HD_MTX_DN	CHEOK_RESPONSE_TO_HD_MTX_DN		19	0.4927199	1.2592539	0.16445623	0.46663365	1.0	1760	tags=37%, list=24%, signal=48%
BRUINS_UVC_RESPONSE_MIDDLE	BRUINS_UVC_RESPONSE_MIDDLE		46	0.4243362	1.2591537	0.13043478	0.466305	1.0	2723	tags=57%, list=37%, signal=89%
MCBRYAN_PUBERTAL_BREAST_6_7WK_UP	MCBRYAN_PUBERTAL_BREAST_6_7WK_UP		127	0.3693145	1.2589574	0.08814271	0.46625045	1.0	2625	tags=48%, list=35%, signal=73%
REACTOME_TRANSPORT_OF_VITAMINS_NUCLEOSIDES_AND_RELATED_MOLECULES	REACTOME_TRANSPORT_OF_VITAMINS_NUCLEOSIDES_AND_RELATED_MOLECULES		11	0.5568309	1.2568096	0.18930042	0.47172537	1.0	559	tags=27%, list=8%, signal=29%
AZARE_NEOPLASTIC_TRANSFORMATION_BY_STAT3_UP	AZARE_NEOPLASTIC_TRANSFORMATION_BY_STAT3_UP		11	0.5552491	1.2559854	0.18660969	0.47347966	1.0	1159	tags=27%, list=16%, signal=32%
GRADE_COLON_VS_RECTAL_CANCER_UP	GRADE_COLON_VS_RECTAL_CANCER_UP		24	0.45665723	1.2554883	0.16141236	0.47432032	1.0	650	tags=21%, list=9%, signal=23%
CHIANG_LIVER_CANCER_SUBCLASS_INTERFERON_DN	CHIANG_LIVER_CANCER_SUBCLASS_INTERFERON_DN		17	0.49868467	1.2554506	0.19277108	0.4738198	1.0	146	tags=18%, list=2%, signal=18%
BILANGES_SERUM_AND_RAPAMYCIN_SENSITIVE_GENES	BILANGES_SERUM_AND_RAPAMYCIN_SENSITIVE_GENES		58	0.39913338	1.2549314	0.1275395	0.47469118	1.0	3722	tags=69%, list=50%, signal=137%
ACOSTA_PROLIFERATION_INDEPENDENT_MYC_TARGETS_UP	ACOSTA_PROLIFERATION_INDEPENDENT_MYC_TARGETS_UP		68	0.3955749	1.2546353	0.12612613	0.47502267	1.0	1488	tags=31%, list=20%, signal=38%
BIOCARTA_RACCYCD_PATHWAY	BIOCARTA_RACCYCD_PATHWAY		19	0.48950234	1.2545402	0.1760841	0.47469106	1.0	1591	tags=37%, list=21%, signal=47%
PID_ALK1PATHWAY	PID_ALK1PATHWAY		14	0.5206223	1.2539936	0.19751382	0.47567785	1.0	2736	tags=64%, list=37%, signal=102%
TSUNODA_CISPLATIN_RESISTANCE_UP	TSUNODA_CISPLATIN_RESISTANCE_UP		11	0.5529923	1.2539777	0.1898017	0.47512743	1.0	1971	tags=73%, list=26%, signal=99%
BROWNE_HCMV_INFECTION_16HR_UP	BROWNE_HCMV_INFECTION_16HR_UP		142	0.36070445	1.2534724	0.086188994	0.4759538	1.0	1425	tags=30%, list=19%, signal=37%
SHAFFER_IRF4_TARGETS_IN_ACTIVATED_DENDRITIC_CELL	SHAFFER_IRF4_TARGETS_IN_ACTIVATED_DENDRITIC_CELL		43	0.425097	1.2531633	0.16047904	0.4762467	1.0	660	tags=19%, list=9%, signal=20%
KYNG_ENVIRONMENTAL_STRESS_RESPONSE_DN	KYNG_ENVIRONMENTAL_STRESS_RESPONSE_DN		10	0.56560373	1.2525856	0.17765044	0.47730243	1.0	2303	tags=70%, list=31%, signal=101%
KRIGE_RESPONSE_TO_TOSEDOSTAT_6HR_DN	KRIGE_RESPONSE_TO_TOSEDOSTAT_6HR_DN		475	0.34204927	1.2520471	0.018036073	0.4782623	1.0	2025	tags=31%, list=27%, signal=40%
YAMASHITA_LIVER_CANCER_STEM_CELL_UP	YAMASHITA_LIVER_CANCER_STEM_CELL_UP		24	0.4620523	1.2516034	0.1943734	0.4789482	1.0	247	tags=17%, list=3%, signal=17%
JUBAN_TARGETS_OF_SPI1_AND_FLI1_DN	JUBAN_TARGETS_OF_SPI1_AND_FLI1_DN		50	0.40574822	1.250898	0.14814815	0.48033282	1.0	2499	tags=50%, list=34%, signal=75%
MOROSETTI_FACIOSCAPULOHUMERAL_MUSCULAR_DISTROPHY_DN	MOROSETTI_FACIOSCAPULOHUMERAL_MUSCULAR_DISTROPHY_DN		10	0.5538843	1.2501216	0.20487106	0.48199132	1.0	564	tags=40%, list=8%, signal=43%
DAVICIONI_MOLECULAR_ARMS_VS_ERMS_UP	DAVICIONI_MOLECULAR_ARMS_VS_ERMS_UP		233	0.34733105	1.2500988	0.054655872	0.4814631	1.0	1373	tags=22%, list=18%, signal=26%
FERRANDO_T_ALL_WITH_MLL_ENL_FUSION_UP	FERRANDO_T_ALL_WITH_MLL_ENL_FUSION_UP		65	0.3885902	1.2500432	0.14041096	0.4810257	1.0	1648	tags=28%, list=22%, signal=35%
XU_RESPONSE_TO_TRETINOIN_AND_NSC682994_DN	XU_RESPONSE_TO_TRETINOIN_AND_NSC682994_DN		14	0.510377	1.2492566	0.20538244	0.48264894	1.0	2012	tags=50%, list=27%, signal=68%
PID_FOXOPATHWAY	PID_FOXOPATHWAY		34	0.43423545	1.2492508	0.18282208	0.48206735	1.0	591	tags=15%, list=8%, signal=16%
MIPS_MEDIATOR_COMPLEX_1	MIPS_MEDIATOR_COMPLEX_1		14	0.5285693	1.2491381	0.20109439	0.4817803	1.0	2632	tags=64%, list=35%, signal=99%
KEGG_CYSTEINE_AND_METHIONINE_METABOLISM	KEGG_CYSTEINE_AND_METHIONINE_METABOLISM		23	0.46842492	1.2485192	0.1787995	0.48289675	1.0	2522	tags=48%, list=34%, signal=72%
MIPS_SMN_COMPLEX	MIPS_SMN_COMPLEX		10	0.57182544	1.2482356	0.17712691	0.48313078	1.0	2165	tags=70%, list=29%, signal=99%
BAKKER_FOXO3_TARGETS_DN	BAKKER_FOXO3_TARGETS_DN		95	0.37131476	1.247577	0.11111111	0.48436272	1.0	1716	tags=27%, list=23%, signal=35%
ZUCCHI_METASTASIS_UP	ZUCCHI_METASTASIS_UP		29	0.44486374	1.2463964	0.18136646	0.48707786	1.0	2410	tags=45%, list=32%, signal=66%
JOHNSTONE_PARVB_TARGETS_2_UP	JOHNSTONE_PARVB_TARGETS_2_UP		88	0.37536493	1.246098	0.13033953	0.48732173	1.0	806	tags=16%, list=11%, signal=18%
FARMER_BREAST_CANCER_APOCRINE_VS_BASAL	FARMER_BREAST_CANCER_APOCRINE_VS_BASAL		218	0.35021248	1.2459644	0.052953158	0.48712197	1.0	1440	tags=23%, list=19%, signal=28%
BIOCARTA_ATRBRCA_PATHWAY	BIOCARTA_ATRBRCA_PATHWAY		10	0.56337297	1.2458122	0.21531792	0.4869487	1.0	1556	tags=60%, list=21%, signal=76%
KAPOSI_LIVER_CANCER_MET_UP	KAPOSI_LIVER_CANCER_MET_UP		16	0.5015949	1.2456484	0.18817204	0.48685914	1.0	186	tags=13%, list=3%, signal=13%
GINESTIER_BREAST_CANCER_ZNF217_AMPLIFIED_DN	GINESTIER_BREAST_CANCER_ZNF217_AMPLIFIED_DN		167	0.3523976	1.2455158	0.088477366	0.48662654	1.0	2205	tags=36%, list=30%, signal=50%
DELACROIX_RAR_BOUND_ES	DELACROIX_RAR_BOUND_ES		202	0.34737238	1.244451	0.062118128	0.48896068	1.0	1432	tags=25%, list=19%, signal=30%
AGUIRRE_PANCREATIC_CANCER_COPY_NUMBER_UP	AGUIRRE_PANCREATIC_CANCER_COPY_NUMBER_UP		205	0.34978083	1.2429714	0.078893445	0.4926062	1.0	2449	tags=34%, list=33%, signal=49%
REACTOME_ABORTIVE_ELONGATION_OF_HIV1_TRANSCRIPT_IN_THE_ABSENCE_OF_TAT	REACTOME_ABORTIVE_ELONGATION_OF_HIV1_TRANSCRIPT_IN_THE_ABSENCE_OF_TAT		19	0.4924062	1.2415698	0.18573351	0.4959323	1.0	3428	tags=79%, list=46%, signal=146%
MIPS_RNA_POLYMERASE_II_COMPLEX_CHROMATIN_STRUCTURE_MODIFYING	MIPS_RNA_POLYMERASE_II_COMPLEX_CHROMATIN_STRUCTURE_MODIFYING		18	0.49067584	1.241374	0.20639148	0.49591318	1.0	2189	tags=50%, list=29%, signal=71%
ROME_INSULIN_TARGETS_IN_MUSCLE_DN	ROME_INSULIN_TARGETS_IN_MUSCLE_DN		67	0.3887037	1.2400789	0.1523702	0.49898812	1.0	932	tags=24%, list=13%, signal=27%
FONTAINE_FOLLICULAR_THYROID_ADENOMA_UP	FONTAINE_FOLLICULAR_THYROID_ADENOMA_UP		36	0.42468223	1.2397109	0.19082126	0.4994372	1.0	965	tags=25%, list=13%, signal=29%
KAYO_AGING_MUSCLE_DN	KAYO_AGING_MUSCLE_DN		88	0.37364197	1.236383	0.13274336	0.50850433	1.0	2528	tags=40%, list=34%, signal=60%
MIPS_HES1_PROMOTER_NOTCH_ENHANCER_COMPLEX	MIPS_HES1_PROMOTER_NOTCH_ENHANCER_COMPLEX		10	0.55930007	1.2359163	0.21309192	0.50926214	1.0	529	tags=30%, list=7%, signal=32%
MUELLER_COMMON_TARGETS_OF_AML_FUSIONS_DN	MUELLER_COMMON_TARGETS_OF_AML_FUSIONS_DN		14	0.5075021	1.235067	0.218107	0.5111437	1.0	736	tags=29%, list=10%, signal=32%
TAKAO_RESPONSE_TO_UVB_RADIATION_DN	TAKAO_RESPONSE_TO_UVB_RADIATION_DN		81	0.376913	1.2348937	0.1401766	0.5110577	1.0	2818	tags=48%, list=38%, signal=77%
BIOCARTA_P53_PATHWAY	BIOCARTA_P53_PATHWAY		11	0.56014085	1.2348045	0.22766571	0.5107434	1.0	1285	tags=45%, list=17%, signal=55%
REACTOME_RECYCLING_PATHWAY_OF_L1	REACTOME_RECYCLING_PATHWAY_OF_L1		19	0.4832948	1.2338929	0.18954249	0.5127786	1.0	654	tags=16%, list=9%, signal=17%
GOTZMANN_EPITHELIAL_TO_MESENCHYMAL_TRANSITION_UP	GOTZMANN_EPITHELIAL_TO_MESENCHYMAL_TRANSITION_UP		54	0.39114213	1.2328671	0.16493656	0.515178	1.0	1961	tags=39%, list=26%, signal=52%
MAINA_VHL_TARGETS_DN	MAINA_VHL_TARGETS_DN		12	0.5331521	1.2327983	0.22457626	0.5147629	1.0	2711	tags=67%, list=36%, signal=105%
KONDO_PROSTATE_CANCER_WITH_H3K27ME3	KONDO_PROSTATE_CANCER_WITH_H3K27ME3		32	0.43398547	1.2325675	0.1975	0.514804	1.0	1198	tags=25%, list=16%, signal=30%
TURASHVILI_BREAST_LOBULAR_CARCINOMA_VS_DUCTAL_NORMAL_UP	TURASHVILI_BREAST_LOBULAR_CARCINOMA_VS_DUCTAL_NORMAL_UP		41	0.42078412	1.2324938	0.1797066	0.5144156	1.0	1968	tags=56%, list=26%, signal=76%
WONG_PROTEASOME_GENE_MODULE	WONG_PROTEASOME_GENE_MODULE		42	0.40964174	1.231648	0.18016928	0.5162193	1.0	1698	tags=29%, list=23%, signal=37%
SAKAI_CHRONIC_HEPATITIS_VS_LIVER_CANCER_DN	SAKAI_CHRONIC_HEPATITIS_VS_LIVER_CANCER_DN		17	0.49239752	1.2314535	0.20754717	0.5162077	1.0	517	tags=12%, list=7%, signal=13%
NIELSEN_MALIGNAT_FIBROUS_HISTIOCYTOMA_UP	NIELSEN_MALIGNAT_FIBROUS_HISTIOCYTOMA_UP		11	0.5475354	1.2307278	0.21088435	0.5178117	1.0	2380	tags=73%, list=32%, signal=107%
KEGG_PANCREATIC_CANCER	KEGG_PANCREATIC_CANCER		43	0.41743934	1.2298548	0.16171224	0.51981187	1.0	1285	tags=26%, list=17%, signal=31%
BIOCARTA_MITOCHONDRIA_PATHWAY	BIOCARTA_MITOCHONDRIA_PATHWAY		12	0.5301917	1.2264441	0.20943135	0.52927315	1.0	707	tags=25%, list=10%, signal=28%
REACTOME_CYTOSOLIC_TRNA_AMINOACYLATION	REACTOME_CYTOSOLIC_TRNA_AMINOACYLATION		21	0.46611735	1.225463	0.20451693	0.5316394	1.0	3274	tags=67%, list=44%, signal=119%
BARRIER_CANCER_RELAPSE_NORMAL_SAMPLE_DN	BARRIER_CANCER_RELAPSE_NORMAL_SAMPLE_DN		26	0.4426478	1.2250893	0.20777643	0.5321036	1.0	1592	tags=35%, list=21%, signal=44%
ELLWOOD_MYC_TARGETS_DN	ELLWOOD_MYC_TARGETS_DN		22	0.45516965	1.223926	0.22062664	0.5349668	1.0	1933	tags=32%, list=26%, signal=43%
REACTOME_MRNA_CAPPING	REACTOME_MRNA_CAPPING		21	0.4751253	1.2236838	0.22668394	0.5351032	1.0	3554	tags=81%, list=48%, signal=155%
IWANAGA_CARCINOGENESIS_BY_KRAS_DN	IWANAGA_CARCINOGENESIS_BY_KRAS_DN		63	0.38450578	1.2228111	0.15384616	0.5371701	1.0	2467	tags=49%, list=33%, signal=73%
LIU_SOX4_TARGETS_DN	LIU_SOX4_TARGETS_DN		214	0.34116635	1.2227213	0.09072375	0.5368001	1.0	1827	tags=29%, list=25%, signal=38%
YAGUE_PRETUMOR_DRUG_RESISTANCE_DN	YAGUE_PRETUMOR_DRUG_RESISTANCE_DN		10	0.5491229	1.221536	0.21595599	0.53976244	1.0	736	tags=30%, list=10%, signal=33%
REACTOME_INTERFERON_SIGNALING	REACTOME_INTERFERON_SIGNALING		95	0.36780345	1.2214098	0.14517877	0.5395071	1.0	1801	tags=33%, list=24%, signal=43%
REACTOME_SULFUR_AMINO_ACID_METABOLISM	REACTOME_SULFUR_AMINO_ACID_METABOLISM		19	0.46991435	1.220723	0.21003963	0.5409937	1.0	2356	tags=37%, list=32%, signal=54%
VIETOR_IFRD1_TARGETS	VIETOR_IFRD1_TARGETS		14	0.5047172	1.2205787	0.22085048	0.5407746	1.0	568	tags=21%, list=8%, signal=23%
PID_CD8TCRPATHWAY	PID_CD8TCRPATHWAY		25	0.4552442	1.219546	0.19391635	0.5433097	1.0	2373	tags=44%, list=32%, signal=64%
CHUNG_BLISTER_CYTOTOXICITY_UP	CHUNG_BLISTER_CYTOTOXICITY_UP		83	0.3749866	1.2194905	0.16204217	0.5428355	1.0	1022	tags=16%, list=14%, signal=18%
REACTOME_RNA_POL_I_TRANSCRIPTION_INITIATION	REACTOME_RNA_POL_I_TRANSCRIPTION_INITIATION		14	0.50171876	1.2194866	0.23014805	0.5422205	1.0	2892	tags=64%, list=39%, signal=105%
REACTOME_DESTABILIZATION_OF_MRNA_BY_KSRP	REACTOME_DESTABILIZATION_OF_MRNA_BY_KSRP		13	0.5244232	1.2189816	0.22036262	0.54314756	1.0	1355	tags=38%, list=18%, signal=47%
AGUIRRE_PANCREATIC_CANCER_COPY_NUMBER_DN	AGUIRRE_PANCREATIC_CANCER_COPY_NUMBER_DN		165	0.34687966	1.218507	0.11354167	0.54390323	1.0	2322	tags=36%, list=31%, signal=51%
BHAT_ESR1_TARGETS_VIA_AKT1_DN	BHAT_ESR1_TARGETS_VIA_AKT1_DN		38	0.41903257	1.2182268	0.20318237	0.5441336	1.0	781	tags=24%, list=11%, signal=26%
PID_KITPATHWAY	PID_KITPATHWAY		36	0.41579333	1.21812	0.2	0.54386044	1.0	2339	tags=44%, list=31%, signal=65%
MIPS_ARC_L_COMPLEX	MIPS_ARC_L_COMPLEX		11	0.5424145	1.2170451	0.22676057	0.5464588	1.0	2632	tags=64%, list=35%, signal=98%
NIELSEN_GIST_VS_SYNOVIAL_SARCOMA_UP	NIELSEN_GIST_VS_SYNOVIAL_SARCOMA_UP		10	0.5510719	1.2164	0.23891273	0.54770035	1.0	1730	tags=60%, list=23%, signal=78%
MELLMAN_TUT1_TARGETS_UP	MELLMAN_TUT1_TARGETS_UP		11	0.5379208	1.2162081	0.23728813	0.54761195	1.0	2583	tags=73%, list=35%, signal=111%
LEIN_CHOROID_PLEXUS_MARKERS	LEIN_CHOROID_PLEXUS_MARKERS		42	0.40839967	1.2156816	0.19557196	0.5486018	1.0	889	tags=21%, list=12%, signal=24%
REACTOME_FORMATION_OF_INCISION_COMPLEX_IN_GG_NER	REACTOME_FORMATION_OF_INCISION_COMPLEX_IN_GG_NER		14	0.50509906	1.2148575	0.24119242	0.5504097	1.0	3641	tags=93%, list=49%, signal=182%
HATADA_METHYLATED_IN_LUNG_CANCER_UP	HATADA_METHYLATED_IN_LUNG_CANCER_UP		136	0.35333496	1.214612	0.125	0.55052483	1.0	1339	tags=23%, list=18%, signal=27%
BROWNE_HCMV_INFECTION_1HR_DN	BROWNE_HCMV_INFECTION_1HR_DN		123	0.35610893	1.2139503	0.14285715	0.55188113	1.0	2037	tags=35%, list=27%, signal=47%
ZHENG_BOUND_BY_FOXP3	ZHENG_BOUND_BY_FOXP3		220	0.34128335	1.2137587	0.103975534	0.5518011	1.0	1590	tags=30%, list=21%, signal=36%
CHIARETTI_ACUTE_LYMPHOBLASTIC_LEUKEMIA_ZAP70	CHIARETTI_ACUTE_LYMPHOBLASTIC_LEUKEMIA_ZAP70		42	0.40537882	1.2135957	0.18975553	0.5516606	1.0	1802	tags=33%, list=24%, signal=44%
XU_GH1_EXOGENOUS_TARGETS_DN	XU_GH1_EXOGENOUS_TARGETS_DN		50	0.39148983	1.2132142	0.20095694	0.5522453	1.0	1389	tags=22%, list=19%, signal=27%
DEBIASI_APOPTOSIS_BY_REOVIRUS_INFECTION_UP	DEBIASI_APOPTOSIS_BY_REOVIRUS_INFECTION_UP		207	0.34165496	1.21264	0.10408163	0.5533434	1.0	1859	tags=32%, list=25%, signal=41%
TSENG_IRS1_TARGETS_UP	TSENG_IRS1_TARGETS_UP		75	0.37494302	1.2121475	0.17732884	0.55422467	1.0	1665	tags=29%, list=22%, signal=37%
REACTOME_INFLUENZA_VIRAL_RNA_TRANSCRIPTION_AND_REPLICATION	REACTOME_INFLUENZA_VIRAL_RNA_TRANSCRIPTION_AND_REPLICATION		87	0.36802337	1.2115246	0.17434211	0.5555183	1.0	3935	tags=76%, list=53%, signal=159%
REACTOME_RNA_POL_II_PRE_TRANSCRIPTION_EVENTS	REACTOME_RNA_POL_II_PRE_TRANSCRIPTION_EVENTS		42	0.40520006	1.2113564	0.1887456	0.5553815	1.0	3239	tags=67%, list=44%, signal=117%
SMIRNOV_RESPONSE_TO_IR_6HR_UP	SMIRNOV_RESPONSE_TO_IR_6HR_UP		114	0.35427895	1.2110254	0.14889124	0.5557388	1.0	1043	tags=20%, list=14%, signal=23%
KEGG_SMALL_CELL_LUNG_CANCER	KEGG_SMALL_CELL_LUNG_CANCER		50	0.39119324	1.2100503	0.17273796	0.55809444	1.0	2555	tags=44%, list=34%, signal=67%
FINAK_BREAST_CANCER_SDPP_SIGNATURE	FINAK_BREAST_CANCER_SDPP_SIGNATURE		11	0.5313029	1.2093008	0.256447	0.55972475	1.0	517	tags=36%, list=7%, signal=39%
REACTOME_RORA_ACTIVATES_CIRCADIAN_EXPRESSION	REACTOME_RORA_ACTIVATES_CIRCADIAN_EXPRESSION		14	0.50948185	1.2091866	0.22695035	0.559429	1.0	1685	tags=50%, list=23%, signal=65%
MATTIOLI_MGUS_VS_MULTIPLE_MYELOMA	MATTIOLI_MGUS_VS_MULTIPLE_MYELOMA		14	0.5000829	1.2091018	0.2364395	0.559088	1.0	1594	tags=50%, list=21%, signal=64%
SHEN_SMARCA2_TARGETS_UP	SHEN_SMARCA2_TARGETS_UP		354	0.33316976	1.2087204	0.044132397	0.5595988	1.0	2722	tags=42%, list=37%, signal=62%
PURBEY_TARGETS_OF_CTBP1_NOT_SATB1_UP	PURBEY_TARGETS_OF_CTBP1_NOT_SATB1_UP		168	0.34212673	1.2084686	0.12200209	0.55973226	1.0	1667	tags=28%, list=22%, signal=35%
CHARAFE_BREAST_CANCER_LUMINAL_VS_MESENCHYMAL_DN	CHARAFE_BREAST_CANCER_LUMINAL_VS_MESENCHYMAL_DN		283	0.33662745	1.208197	0.07302231	0.5599589	1.0	2112	tags=34%, list=28%, signal=46%
MIPS_TRBP_CONTAINING_COMPLEX_1	MIPS_TRBP_CONTAINING_COMPLEX_1		21	0.4669546	1.2073385	0.22813688	0.5619485	1.0	3636	tags=81%, list=49%, signal=158%
MILI_PSEUDOPODIA_HAPTOTAXIS_UP	MILI_PSEUDOPODIA_HAPTOTAXIS_UP		309	0.33289418	1.2062165	0.065590315	0.5647729	1.0	2877	tags=46%, list=39%, signal=71%
CHEN_HOXA5_TARGETS_9HR_UP	CHEN_HOXA5_TARGETS_9HR_UP		155	0.34267187	1.205866	0.12382934	0.56519306	1.0	1857	tags=35%, list=25%, signal=46%
MENSSEN_MYC_TARGETS	MENSSEN_MYC_TARGETS		44	0.40324217	1.2052448	0.20727272	0.5664205	1.0	1035	tags=14%, list=14%, signal=16%
WORSCHECH_TUMOR_REJECTION_UP	WORSCHECH_TUMOR_REJECTION_UP		19	0.47155184	1.2038386	0.22119205	0.5701446	1.0	1991	tags=37%, list=27%, signal=50%
VERHAAK_GLIOBLASTOMA_CLASSICAL	VERHAAK_GLIOBLASTOMA_CLASSICAL		109	0.35824454	1.2032284	0.15210356	0.5713758	1.0	1513	tags=30%, list=20%, signal=37%
BERNARD_PPAPDC1B_TARGETS_UP	BERNARD_PPAPDC1B_TARGETS_UP		25	0.4475951	1.2031932	0.22950819	0.57084584	1.0	1271	tags=24%, list=17%, signal=29%
IVANOVA_HEMATOPOIESIS_STEM_CELL_AND_PROGENITOR	IVANOVA_HEMATOPOIESIS_STEM_CELL_AND_PROGENITOR		302	0.32935593	1.2030941	0.072	0.5705031	1.0	1822	tags=29%, list=24%, signal=37%
PID_SYNDECAN_1_PATHWAY	PID_SYNDECAN_1_PATHWAY		29	0.42835757	1.2023	0.22333752	0.57227665	1.0	1730	tags=38%, list=23%, signal=49%
BIOCARTA_COMP_PATHWAY	BIOCARTA_COMP_PATHWAY		12	0.5131762	1.2022036	0.24894515	0.57191527	1.0	2975	tags=67%, list=40%, signal=111%
URS_ADIPOCYTE_DIFFERENTIATION_DN	URS_ADIPOCYTE_DIFFERENTIATION_DN		20	0.46700972	1.2020948	0.21825397	0.5716037	1.0	2388	tags=65%, list=32%, signal=95%
RAO_BOUND_BY_SALL4	RAO_BOUND_BY_SALL4		102	0.3543146	1.2015884	0.15027027	0.572562	1.0	908	tags=22%, list=12%, signal=24%
SEITZ_NEOPLASTIC_TRANSFORMATION_BY_8P_DELETION_DN	SEITZ_NEOPLASTIC_TRANSFORMATION_BY_8P_DELETION_DN		23	0.4570924	1.2010839	0.23974359	0.5734992	1.0	1400	tags=35%, list=19%, signal=43%
PID_ERA_GENOMIC_PATHWAY	PID_ERA_GENOMIC_PATHWAY		38	0.4123437	1.200229	0.21631205	0.57554424	1.0	1256	tags=29%, list=17%, signal=35%
KEGG_T_CELL_RECEPTOR_SIGNALING_PATHWAY	KEGG_T_CELL_RECEPTOR_SIGNALING_PATHWAY		56	0.3859712	1.1996944	0.19109027	0.5765044	1.0	1275	tags=25%, list=17%, signal=30%
BIOCARTA_NFKB_PATHWAY	BIOCARTA_NFKB_PATHWAY		13	0.5062398	1.1993079	0.23407203	0.57705414	1.0	1804	tags=46%, list=24%, signal=61%
GAZDA_DIAMOND_BLACKFAN_ANEMIA_ERYTHROID_DN	GAZDA_DIAMOND_BLACKFAN_ANEMIA_ERYTHROID_DN		293	0.33100417	1.1985394	0.08906882	0.5788596	1.0	1857	tags=29%, list=25%, signal=37%
REACTOME_CYTOKINE_SIGNALING_IN_IMMUNE_SYSTEM	REACTOME_CYTOKINE_SIGNALING_IN_IMMUNE_SYSTEM		148	0.3457277	1.1984177	0.1259105	0.5785628	1.0	2409	tags=42%, list=32%, signal=61%
DAZARD_RESPONSE_TO_UV_SCC_UP	DAZARD_RESPONSE_TO_UV_SCC_UP		96	0.35759795	1.1974522	0.17424242	0.58091486	1.0	1299	tags=22%, list=17%, signal=26%
CHOI_ATL_STAGE_PREDICTOR	CHOI_ATL_STAGE_PREDICTOR		34	0.41138577	1.1966542	0.22794117	0.5827522	1.0	2618	tags=47%, list=35%, signal=72%
HOLLEMAN_ASPARAGINASE_RESISTANCE_ALL_DN	HOLLEMAN_ASPARAGINASE_RESISTANCE_ALL_DN		21	0.46785042	1.1962144	0.22506393	0.58348644	1.0	2633	tags=48%, list=35%, signal=74%
REACTOME_METABOLISM_OF_MRNA	REACTOME_METABOLISM_OF_MRNA		176	0.3406859	1.1959695	0.14358452	0.5836269	1.0	3375	tags=56%, list=45%, signal=100%
HERNANDEZ_MITOTIC_ARREST_BY_DOCETAXEL_2_UP	HERNANDEZ_MITOTIC_ARREST_BY_DOCETAXEL_2_UP		41	0.40288845	1.1959517	0.21281742	0.5830417	1.0	262	tags=12%, list=4%, signal=13%
LIN_APC_TARGETS	LIN_APC_TARGETS		53	0.38894793	1.195699	0.18705882	0.58316463	1.0	1850	tags=30%, list=25%, signal=40%
FARMER_BREAST_CANCER_CLUSTER_6	FARMER_BREAST_CANCER_CLUSTER_6		12	0.5261757	1.195349	0.24895105	0.58357877	1.0	3362	tags=92%, list=45%, signal=167%
REACTOME_CITRIC_ACID_CYCLE_TCA_CYCLE	REACTOME_CITRIC_ACID_CYCLE_TCA_CYCLE		16	0.48803398	1.1949147	0.26822558	0.5842934	1.0	1695	tags=38%, list=23%, signal=48%
BENPORATH_OCT4_TARGETS	BENPORATH_OCT4_TARGETS		162	0.33897948	1.1948494	0.1400415	0.58386344	1.0	2380	tags=36%, list=32%, signal=52%
JAERVINEN_AMPLIFIED_IN_LARYNGEAL_CANCER	JAERVINEN_AMPLIFIED_IN_LARYNGEAL_CANCER		25	0.44486532	1.1946071	0.23969072	0.5840118	1.0	2097	tags=40%, list=28%, signal=56%
VANTVEER_BREAST_CANCER_BRCA1_UP	VANTVEER_BREAST_CANCER_BRCA1_UP		20	0.46103793	1.1939335	0.26482213	0.5854659	1.0	3068	tags=80%, list=41%, signal=136%
KEGG_RIBOSOME	KEGG_RIBOSOME		74	0.36738905	1.1930618	0.19127516	0.5875909	1.0	3935	tags=77%, list=53%, signal=162%
XU_AKT1_TARGETS_6HR	XU_AKT1_TARGETS_6HR		15	0.48494127	1.1923659	0.25474253	0.5891418	1.0	512	tags=13%, list=7%, signal=14%
REACTOME_REGULATION_OF_HYPOXIA_INDUCIBLE_FACTOR_HIF_BY_OXYGEN	REACTOME_REGULATION_OF_HYPOXIA_INDUCIBLE_FACTOR_HIF_BY_OXYGEN		15	0.48834428	1.1910794	0.24596775	0.5925995	1.0	940	tags=27%, list=13%, signal=30%
REACTOME_NEGATIVE_REGULATORS_OF_RIG_I_MDA5_SIGNALING	REACTOME_NEGATIVE_REGULATORS_OF_RIG_I_MDA5_SIGNALING		19	0.46479386	1.1910787	0.24871795	0.591956	1.0	2764	tags=53%, list=37%, signal=84%
REACTOME_ANTIGEN_PROCESSING_UBIQUITINATION_PROTEASOME_DEGRADATION	REACTOME_ANTIGEN_PROCESSING_UBIQUITINATION_PROTEASOME_DEGRADATION		133	0.34688297	1.1896269	0.15286624	0.5959767	1.0	2890	tags=44%, list=39%, signal=71%
MA_PITUITARY_FETAL_VS_ADULT_DN	MA_PITUITARY_FETAL_VS_ADULT_DN		14	0.49543548	1.1893259	0.2580645	0.59621906	1.0	2344	tags=57%, list=32%, signal=83%
CAIRO_HEPATOBLASTOMA_UP	CAIRO_HEPATOBLASTOMA_UP		169	0.3406685	1.1893152	0.13510747	0.59560764	1.0	1672	tags=27%, list=22%, signal=34%
YAUCH_HEDGEHOG_SIGNALING_PARACRINE_DN	YAUCH_HEDGEHOG_SIGNALING_PARACRINE_DN		78	0.36509797	1.1888127	0.1962306	0.59652287	1.0	1760	tags=28%, list=24%, signal=37%
REACTOME_COMPLEMENT_CASCADE	REACTOME_COMPLEMENT_CASCADE		20	0.45970258	1.1884254	0.2464146	0.5970493	1.0	587	tags=15%, list=8%, signal=16%
XU_CREBBP_TARGETS_DN	XU_CREBBP_TARGETS_DN		25	0.438821	1.1878222	0.2130102	0.5983476	1.0	2234	tags=44%, list=30%, signal=63%
SCHLOSSER_MYC_TARGETS_AND_SERUM_RESPONSE_UP	SCHLOSSER_MYC_TARGETS_AND_SERUM_RESPONSE_UP		38	0.40650022	1.1874565	0.23170732	0.59883964	1.0	2855	tags=50%, list=38%, signal=81%
WAKABAYASHI_ADIPOGENESIS_PPARG_BOUND_8D	WAKABAYASHI_ADIPOGENESIS_PPARG_BOUND_8D		336	0.32600468	1.1871986	0.08375379	0.5990017	1.0	1998	tags=30%, list=27%, signal=39%
KYNG_WERNER_SYNDROM_AND_NORMAL_AGING_DN	KYNG_WERNER_SYNDROM_AND_NORMAL_AGING_DN		152	0.3397729	1.1865048	0.17913593	0.6005035	1.0	1698	tags=24%, list=23%, signal=30%
UDAYAKUMAR_MED1_TARGETS_UP	UDAYAKUMAR_MED1_TARGETS_UP		108	0.352448	1.1862952	0.17818575	0.6005491	1.0	2530	tags=44%, list=34%, signal=65%
BYSTRYKH_HEMATOPOIESIS_STEM_CELL_AND_BRAIN_QTL_TRANS	BYSTRYKH_HEMATOPOIESIS_STEM_CELL_AND_BRAIN_QTL_TRANS		103	0.35320458	1.1860378	0.16488223	0.6007101	1.0	1570	tags=24%, list=21%, signal=30%
JI_CARCINOGENESIS_BY_KRAS_AND_STK11_DN	JI_CARCINOGENESIS_BY_KRAS_AND_STK11_DN		13	0.5096511	1.1854817	0.24487004	0.6018571	1.0	3044	tags=85%, list=41%, signal=143%
KIM_BIPOLAR_DISORDER_OLIGODENDROCYTE_DENSITY_CORR_DN	KIM_BIPOLAR_DISORDER_OLIGODENDROCYTE_DENSITY_CORR_DN		18	0.4707424	1.1852478	0.2590604	0.60196376	1.0	483	tags=22%, list=6%, signal=24%
PID_SMAD2_3PATHWAY	PID_SMAD2_3PATHWAY		12	0.51209617	1.1847926	0.2584746	0.60275805	1.0	1100	tags=25%, list=15%, signal=29%
WATANABE_RECTAL_CANCER_RADIOTHERAPY_RESPONSIVE_DN	WATANABE_RECTAL_CANCER_RADIOTHERAPY_RESPONSIVE_DN		70	0.37027758	1.1844168	0.20712695	0.603303	1.0	2487	tags=41%, list=33%, signal=62%
PARK_HSC_VS_MULTIPOTENT_PROGENITORS_UP	PARK_HSC_VS_MULTIPOTENT_PROGENITORS_UP		13	0.5060809	1.1841263	0.2742616	0.6035304	1.0	2911	tags=62%, list=39%, signal=101%
SOTIRIOU_BREAST_CANCER_GRADE_1_VS_3_DN	SOTIRIOU_BREAST_CANCER_GRADE_1_VS_3_DN		31	0.41982788	1.1833893	0.24563591	0.6051743	1.0	1574	tags=35%, list=21%, signal=45%
STANELLE_E2F1_TARGETS	STANELLE_E2F1_TARGETS		16	0.47896233	1.1823949	0.25168237	0.60771215	1.0	1013	tags=38%, list=14%, signal=43%
WANG_TUMOR_INVASIVENESS_DN	WANG_TUMOR_INVASIVENESS_DN		149	0.33732674	1.1820568	0.16649215	0.60809267	1.0	2633	tags=38%, list=35%, signal=58%
GABRIELY_MIR21_TARGETS	GABRIELY_MIR21_TARGETS		143	0.33850414	1.1818469	0.1611877	0.6081033	1.0	1835	tags=34%, list=25%, signal=44%
NADERI_BREAST_CANCER_PROGNOSIS_DN	NADERI_BREAST_CANCER_PROGNOSIS_DN		13	0.50651675	1.1815726	0.2482663	0.60832626	1.0	642	tags=23%, list=9%, signal=25%
MUELLER_METHYLATED_IN_GLIOBLASTOMA	MUELLER_METHYLATED_IN_GLIOBLASTOMA		16	0.47764874	1.1809675	0.27333334	0.60958165	1.0	418	tags=19%, list=6%, signal=20%
PENG_RAPAMYCIN_RESPONSE_DN	PENG_RAPAMYCIN_RESPONSE_DN		206	0.3331778	1.1804945	0.13025641	0.610483	1.0	2465	tags=37%, list=33%, signal=54%
REACTOME_REGULATORY_RNA_PATHWAYS	REACTOME_REGULATORY_RNA_PATHWAYS		17	0.47054905	1.1796854	0.268	0.61236006	1.0	3712	tags=88%, list=50%, signal=176%
BIOCARTA_MTOR_PATHWAY	BIOCARTA_MTOR_PATHWAY		19	0.45290473	1.1790634	0.2837838	0.6136491	1.0	1228	tags=26%, list=17%, signal=31%
MOOTHA_TCA	MOOTHA_TCA		14	0.48203	1.179012	0.26243094	0.61315876	1.0	1695	tags=36%, list=23%, signal=46%
CHIBA_RESPONSE_TO_TSA_DN	CHIBA_RESPONSE_TO_TSA_DN		16	0.48185438	1.1787945	0.25630254	0.61319155	1.0	1750	tags=44%, list=24%, signal=57%
DOANE_RESPONSE_TO_ANDROGEN_DN	DOANE_RESPONSE_TO_ANDROGEN_DN		162	0.33954868	1.1787014	0.17010309	0.61285305	1.0	1135	tags=23%, list=15%, signal=27%
LI_WILMS_TUMOR_VS_FETAL_KIDNEY_2_UP	LI_WILMS_TUMOR_VS_FETAL_KIDNEY_2_UP		22	0.44784057	1.1770169	0.24119948	0.61749893	1.0	1480	tags=32%, list=20%, signal=40%
MIPS_CTBP_COMPLEX	MIPS_CTBP_COMPLEX		10	0.5395948	1.1769688	0.27832168	0.6170023	1.0	1609	tags=50%, list=22%, signal=64%
HOLLMANN_APOPTOSIS_VIA_CD40_DN	HOLLMANN_APOPTOSIS_VIA_CD40_DN		202	0.33046892	1.1767837	0.14300412	0.61693496	1.0	1345	tags=22%, list=18%, signal=26%
PID_CASPASE_PATHWAY	PID_CASPASE_PATHWAY		28	0.42051142	1.1761492	0.24751244	0.6183026	1.0	1984	tags=46%, list=27%, signal=63%
WIERENGA_PML_INTERACTOME	WIERENGA_PML_INTERACTOME		35	0.40714365	1.1752867	0.27272728	0.6204214	1.0	3172	tags=57%, list=43%, signal=99%
WONG_ENDMETRIUM_CANCER_DN	WONG_ENDMETRIUM_CANCER_DN		38	0.40260938	1.1730729	0.26881722	0.6269451	1.0	1133	tags=26%, list=15%, signal=31%
MIPS_12S_U11_SNRNP	MIPS_12S_U11_SNRNP		10	0.52975243	1.1729093	0.28873238	0.6267924	1.0	3502	tags=100%, list=47%, signal=189%
MASSARWEH_RESPONSE_TO_ESTRADIOL	MASSARWEH_RESPONSE_TO_ESTRADIOL		43	0.39663383	1.1718632	0.24821003	0.62936926	1.0	276	tags=14%, list=4%, signal=14%
CHESLER_BRAIN_HIGHEST_GENETIC_VARIANCE	CHESLER_BRAIN_HIGHEST_GENETIC_VARIANCE		26	0.42635727	1.1711106	0.2515883	0.6311307	1.0	1498	tags=35%, list=20%, signal=43%
GOTTWEIN_TARGETS_OF_KSHV_MIR_K12_11	GOTTWEIN_TARGETS_OF_KSHV_MIR_K12_11		34	0.40911856	1.169666	0.24142157	0.63517344	1.0	721	tags=18%, list=10%, signal=19%
REACTOME_PEPTIDE_CHAIN_ELONGATION	REACTOME_PEPTIDE_CHAIN_ELONGATION		74	0.3578968	1.1694537	0.2049272	0.63518536	1.0	4061	tags=80%, list=55%, signal=174%
RODRIGUES_THYROID_CARCINOMA_DN	RODRIGUES_THYROID_CARCINOMA_DN		43	0.38724205	1.1690093	0.23317307	0.6359494	1.0	1938	tags=40%, list=26%, signal=53%
BOYAULT_LIVER_CANCER_SUBCLASS_G1_UP	BOYAULT_LIVER_CANCER_SUBCLASS_G1_UP		72	0.36004162	1.168716	0.23502825	0.6362809	1.0	1315	tags=25%, list=18%, signal=30%
KYNG_RESPONSE_TO_H2O2_VIA_ERCC6_DN	KYNG_RESPONSE_TO_H2O2_VIA_ERCC6_DN		38	0.40269685	1.1680437	0.25092706	0.6377057	1.0	2871	tags=55%, list=39%, signal=90%
LOCKWOOD_AMPLIFIED_IN_LUNG_CANCER	LOCKWOOD_AMPLIFIED_IN_LUNG_CANCER		140	0.33509597	1.1680218	0.17954071	0.6371186	1.0	1836	tags=30%, list=25%, signal=39%
JIANG_VHL_TARGETS	JIANG_VHL_TARGETS		86	0.34916502	1.1679406	0.20932755	0.6367289	1.0	2381	tags=41%, list=32%, signal=59%
HAHTOLA_MYCOSIS_FUNGOIDES_SKIN_UP	HAHTOLA_MYCOSIS_FUNGOIDES_SKIN_UP		147	0.3371005	1.1673635	0.1862643	0.6379034	1.0	2747	tags=44%, list=37%, signal=68%
RAHMAN_TP53_TARGETS_PHOSPHORYLATED	RAHMAN_TP53_TARGETS_PHOSPHORYLATED		17	0.46400204	1.1660234	0.2753623	0.6415239	1.0	1887	tags=41%, list=25%, signal=55%
REACTOME_FORMATION_OF_TRANSCRIPTION_COUPLED_NER_TC_NER_REPAIR_COMPLEX	REACTOME_FORMATION_OF_TRANSCRIPTION_COUPLED_NER_TC_NER_REPAIR_COMPLEX		19	0.4564486	1.1648403	0.25886992	0.6446735	1.0	3712	tags=84%, list=50%, signal=168%
GOUYER_TATI_TARGETS_DN	GOUYER_TATI_TARGETS_DN		10	0.52599615	1.1645192	0.28653294	0.6449777	1.0	813	tags=30%, list=11%, signal=34%
VALK_AML_WITH_CEBPA	VALK_AML_WITH_CEBPA		20	0.4493173	1.1644769	0.28129032	0.64444053	1.0	2214	tags=40%, list=30%, signal=57%
LEE_METASTASIS_AND_RNA_PROCESSING_UP	LEE_METASTASIS_AND_RNA_PROCESSING_UP		15	0.47435024	1.1644112	0.27572018	0.64401066	1.0	3398	tags=80%, list=46%, signal=147%
BIOCARTA_HER2_PATHWAY	BIOCARTA_HER2_PATHWAY		15	0.4782949	1.1642272	0.3044655	0.6440186	1.0	1921	tags=47%, list=26%, signal=63%
PID_ILK_PATHWAY	PID_ILK_PATHWAY		35	0.4052928	1.1638845	0.249694	0.6444643	1.0	1113	tags=26%, list=15%, signal=30%
REACTOME_TRANSLATION	REACTOME_TRANSLATION		126	0.33841556	1.163543	0.20297556	0.6449579	1.0	4061	tags=77%, list=55%, signal=167%
PASQUALUCCI_LYMPHOMA_BY_GC_STAGE_DN	PASQUALUCCI_LYMPHOMA_BY_GC_STAGE_DN		82	0.35677838	1.1632785	0.21758737	0.64514333	1.0	2569	tags=48%, list=35%, signal=72%
REACTOME_MICRORNA_MIRNA_BIOGENESIS	REACTOME_MICRORNA_MIRNA_BIOGENESIS		16	0.46663237	1.1632172	0.29708222	0.6446604	1.0	3712	tags=88%, list=50%, signal=174%
MCCLUNG_COCAIN_REWARD_4WK	MCCLUNG_COCAIN_REWARD_4WK		37	0.3961508	1.162953	0.25833333	0.6448798	1.0	2000	tags=38%, list=27%, signal=51%
KIM_WT1_TARGETS_12HR_DN	KIM_WT1_TARGETS_12HR_DN		141	0.33659026	1.1626484	0.17972831	0.64520586	1.0	2507	tags=41%, list=34%, signal=61%
REACTOME_G1_PHASE	REACTOME_G1_PHASE		25	0.42942888	1.1624786	0.28607595	0.64510876	1.0	2504	tags=52%, list=34%, signal=78%
REACTOME_SIGNALING_BY_FGFR1_MUTANTS	REACTOME_SIGNALING_BY_FGFR1_MUTANTS		13	0.49868557	1.1618661	0.28278688	0.64641297	1.0	2208	tags=54%, list=30%, signal=76%
LANDIS_BREAST_CANCER_PROGRESSION_DN	LANDIS_BREAST_CANCER_PROGRESSION_DN		54	0.37582263	1.1614699	0.23502304	0.6469956	1.0	1869	tags=33%, list=25%, signal=44%
MALONEY_RESPONSE_TO_17AAG_DN	MALONEY_RESPONSE_TO_17AAG_DN		66	0.36837146	1.1614084	0.23496659	0.6465206	1.0	3039	tags=48%, list=41%, signal=81%
BONOME_OVARIAN_CANCER_POOR_SURVIVAL_DN	BONOME_OVARIAN_CANCER_POOR_SURVIVAL_DN		16	0.4688668	1.1612566	0.28894806	0.64633834	1.0	1353	tags=25%, list=18%, signal=30%
REACTOME_SEMA3A_PAK_DEPENDENT_AXON_REPULSION	REACTOME_SEMA3A_PAK_DEPENDENT_AXON_REPULSION		10	0.5121016	1.1608943	0.29453015	0.6468647	1.0	1275	tags=30%, list=17%, signal=36%
SANSOM_WNT_PATHWAY_REQUIRE_MYC	SANSOM_WNT_PATHWAY_REQUIRE_MYC		32	0.41189694	1.1603659	0.25507614	0.6479329	1.0	1643	tags=47%, list=22%, signal=60%
VERRECCHIA_RESPONSE_TO_TGFB1_C5	VERRECCHIA_RESPONSE_TO_TGFB1_C5		13	0.49299908	1.1598724	0.30068028	0.6488133	1.0	2129	tags=46%, list=29%, signal=65%
KEGG_PATHWAYS_IN_CANCER	KEGG_PATHWAYS_IN_CANCER		176	0.32943922	1.1597282	0.19544984	0.648605	1.0	2144	tags=34%, list=29%, signal=47%
KEGG_PROSTATE_CANCER	KEGG_PROSTATE_CANCER		56	0.36550695	1.1582325	0.25602755	0.6527742	1.0	2087	tags=38%, list=28%, signal=52%
WANG_TUMOR_INVASIVENESS_UP	WANG_TUMOR_INVASIVENESS_UP		286	0.32057515	1.1571498	0.138833	0.65551925	1.0	2910	tags=40%, list=39%, signal=62%
REACTOME_SMOOTH_MUSCLE_CONTRACTION	REACTOME_SMOOTH_MUSCLE_CONTRACTION		14	0.47719127	1.1568409	0.28137386	0.6558244	1.0	1202	tags=29%, list=16%, signal=34%
OUELLET_CULTURED_OVARIAN_CANCER_INVASIVE_VS_LMP_UP	OUELLET_CULTURED_OVARIAN_CANCER_INVASIVE_VS_LMP_UP		50	0.38296765	1.1564482	0.23508772	0.656489	1.0	2329	tags=42%, list=31%, signal=61%
POMEROY_MEDULLOBLASTOMA_PROGNOSIS_UP	POMEROY_MEDULLOBLASTOMA_PROGNOSIS_UP		33	0.40189806	1.1564244	0.28076464	0.65590984	1.0	1933	tags=36%, list=26%, signal=49%
MIPS_HCF_1_COMPLEX	MIPS_HCF_1_COMPLEX		14	0.4764925	1.1564114	0.27824858	0.65529764	1.0	46	tags=7%, list=1%, signal=7%
BROWNE_INTERFERON_RESPONSIVE_GENES	BROWNE_INTERFERON_RESPONSIVE_GENES		43	0.387268	1.1564035	0.2747909	0.65467405	1.0	2059	tags=37%, list=28%, signal=51%
SCHLOSSER_SERUM_RESPONSE_UP	SCHLOSSER_SERUM_RESPONSE_UP		82	0.35218313	1.1563679	0.24972253	0.65413743	1.0	1917	tags=37%, list=26%, signal=49%
PID_REELINPATHWAY	PID_REELINPATHWAY		18	0.4492434	1.1547257	0.2917772	0.6587696	1.0	1275	tags=28%, list=17%, signal=33%
REACTOME_TRANSCRIPTIONAL_REGULATION_OF_WHITE_ADIPOCYTE_DIFFERENTIATION	REACTOME_TRANSCRIPTIONAL_REGULATION_OF_WHITE_ADIPOCYTE_DIFFERENTIATION		39	0.39828435	1.1544722	0.27675277	0.6589451	1.0	2632	tags=56%, list=35%, signal=87%
JAZAG_TGFB1_SIGNALING_UP	JAZAG_TGFB1_SIGNALING_UP		57	0.36803547	1.1544061	0.242741	0.6585137	1.0	1585	tags=26%, list=21%, signal=33%
DURAND_STROMA_MAX_DN	DURAND_STROMA_MAX_DN		67	0.36230692	1.1543573	0.23726852	0.65801066	1.0	1930	tags=33%, list=26%, signal=44%
HUMMEL_BURKITTS_LYMPHOMA_UP	HUMMEL_BURKITTS_LYMPHOMA_UP		34	0.4026739	1.1537275	0.28947368	0.65942496	1.0	1523	tags=35%, list=20%, signal=44%
REACTOME_NONSENSE_MEDIATED_DECAY_ENHANCED_BY_THE_EXON_JUNCTION_COMPLEX	REACTOME_NONSENSE_MEDIATED_DECAY_ENHANCED_BY_THE_EXON_JUNCTION_COMPLEX		90	0.3452901	1.1536813	0.21653971	0.658897	1.0	3935	tags=74%, list=53%, signal=156%
NIKOLSKY_BREAST_CANCER_21Q22_AMPLICON	NIKOLSKY_BREAST_CANCER_21Q22_AMPLICON		11	0.50907964	1.1532619	0.28413793	0.659624	1.0	2454	tags=45%, list=33%, signal=68%
RUAN_RESPONSE_TO_TROGLITAZONE_DN	RUAN_RESPONSE_TO_TROGLITAZONE_DN		13	0.49213225	1.1530092	0.30790567	0.659819	1.0	202	tags=15%, list=3%, signal=16%
BILD_SRC_ONCOGENIC_SIGNATURE	BILD_SRC_ONCOGENIC_SIGNATURE		37	0.3922248	1.1521665	0.2786683	0.6618202	1.0	1834	tags=35%, list=25%, signal=46%
BENPORATH_NOS_TARGETS	BENPORATH_NOS_TARGETS		88	0.3472981	1.1520864	0.22903226	0.6614126	1.0	2427	tags=41%, list=33%, signal=60%
XU_GH1_AUTOCRINE_TARGETS_DN	XU_GH1_AUTOCRINE_TARGETS_DN		83	0.35118717	1.1512097	0.22555555	0.66359514	1.0	2323	tags=36%, list=31%, signal=52%
LEE_LIVER_CANCER_HEPATOBLAST	LEE_LIVER_CANCER_HEPATOBLAST		11	0.5057999	1.1509789	0.29325512	0.6637241	1.0	1749	tags=64%, list=24%, signal=83%
SAKAI_CHRONIC_HEPATITIS_VS_LIVER_CANCER_UP	SAKAI_CHRONIC_HEPATITIS_VS_LIVER_CANCER_UP		56	0.36839628	1.1504793	0.2591284	0.664681	1.0	1528	tags=27%, list=21%, signal=33%
FIGUEROA_AML_METHYLATION_CLUSTER_3_DN	FIGUEROA_AML_METHYLATION_CLUSTER_3_DN		18	0.45564687	1.1500839	0.30457518	0.6653605	1.0	1584	tags=33%, list=21%, signal=42%
RADMACHER_AML_PROGNOSIS	RADMACHER_AML_PROGNOSIS		49	0.37780344	1.1497236	0.2845138	0.66584885	1.0	665	tags=20%, list=9%, signal=22%
SANDERSON_PPARA_TARGETS	SANDERSON_PPARA_TARGETS		10	0.51677024	1.1491785	0.2977208	0.6669664	1.0	2595	tags=60%, list=35%, signal=92%
REACTOME_PPARA_ACTIVATES_GENE_EXPRESSION	REACTOME_PPARA_ACTIVATES_GENE_EXPRESSION		58	0.3665447	1.1491717	0.26176807	0.66632634	1.0	2169	tags=43%, list=29%, signal=60%
BENPORATH_SOX2_TARGETS	BENPORATH_SOX2_TARGETS		417	0.31131607	1.1487526	0.10220441	0.66700274	1.0	2022	tags=31%, list=27%, signal=40%
BOWIE_RESPONSE_TO_EXTRACELLULAR_MATRIX	BOWIE_RESPONSE_TO_EXTRACELLULAR_MATRIX		10	0.5260056	1.1486896	0.3090129	0.6665399	1.0	2593	tags=60%, list=35%, signal=92%
REACTOME_GASTRIN_CREB_SIGNALLING_PATHWAY_VIA_PKC_AND_MAPK	REACTOME_GASTRIN_CREB_SIGNALLING_PATHWAY_VIA_PKC_AND_MAPK		73	0.35684878	1.1483697	0.22824858	0.6669033	1.0	1189	tags=25%, list=16%, signal=29%
PID_HDAC_CLASSIII_PATHWAY	PID_HDAC_CLASSIII_PATHWAY		14	0.4855826	1.1477708	0.31058496	0.66823673	1.0	890	tags=36%, list=12%, signal=40%
VERHAAK_GLIOBLASTOMA_PRONEURAL	VERHAAK_GLIOBLASTOMA_PRONEURAL		136	0.33019876	1.1471841	0.22035676	0.66951615	1.0	2291	tags=36%, list=31%, signal=51%
AMUNDSON_RESPONSE_TO_ARSENITE	AMUNDSON_RESPONSE_TO_ARSENITE		157	0.32854596	1.1471175	0.22245322	0.6690616	1.0	1455	tags=24%, list=20%, signal=29%
MIPS_RIBOSOME_CYTOPLASMIC	MIPS_RIBOSOME_CYTOPLASMIC		71	0.35733327	1.1461377	0.26179776	0.6715511	1.0	4061	tags=80%, list=55%, signal=175%
REACTOME_APOPTOTIC_EXECUTION_PHASE	REACTOME_APOPTOTIC_EXECUTION_PHASE		29	0.41281098	1.1459372	0.28230867	0.6715204	1.0	2065	tags=38%, list=28%, signal=52%
FERNANDEZ_BOUND_BY_MYC	FERNANDEZ_BOUND_BY_MYC		132	0.33019486	1.1457788	0.22881356	0.6713703	1.0	919	tags=15%, list=12%, signal=17%
MAINA_VHL_TARGETS_UP	MAINA_VHL_TARGETS_UP		10	0.52116317	1.1453217	0.3027027	0.67213064	1.0	491	tags=20%, list=7%, signal=21%
REACTOME_PYRUVATE_METABOLISM_AND_CITRIC_ACID_TCA_CYCLE	REACTOME_PYRUVATE_METABOLISM_AND_CITRIC_ACID_TCA_CYCLE		26	0.4199122	1.1446368	0.28297055	0.67362505	1.0	1940	tags=31%, list=26%, signal=41%
REACTOME_RNA_POL_I_TRANSCRIPTION_TERMINATION	REACTOME_RNA_POL_I_TRANSCRIPTION_TERMINATION		13	0.48934457	1.1432164	0.28785813	0.6775061	1.0	3712	tags=85%, list=50%, signal=169%
SCHRAMM_INHBA_TARGETS_DN	SCHRAMM_INHBA_TARGETS_DN		18	0.45393473	1.1428949	0.27799228	0.67790747	1.0	2312	tags=56%, list=31%, signal=80%
SHEDDEN_LUNG_CANCER_GOOD_SURVIVAL_A5	SHEDDEN_LUNG_CANCER_GOOD_SURVIVAL_A5		39	0.38703108	1.1426479	0.28295043	0.677998	1.0	1809	tags=31%, list=24%, signal=40%
BROWNE_HCMV_INFECTION_18HR_UP	BROWNE_HCMV_INFECTION_18HR_UP		113	0.33693844	1.1425242	0.23315509	0.677719	1.0	2299	tags=43%, list=31%, signal=62%
HANN_RESISTANCE_TO_BCL2_INHIBITOR_DN	HANN_RESISTANCE_TO_BCL2_INHIBITOR_DN		27	0.41536987	1.1424229	0.2889734	0.67737156	1.0	804	tags=22%, list=11%, signal=25%
BHAT_ESR1_TARGETS_VIA_AKT1_UP	BHAT_ESR1_TARGETS_VIA_AKT1_UP		151	0.3303342	1.1419979	0.20186335	0.67814314	1.0	1265	tags=25%, list=17%, signal=29%
SHIN_B_CELL_LYMPHOMA_CLUSTER_3	SHIN_B_CELL_LYMPHOMA_CLUSTER_3		12	0.49007535	1.1418729	0.33333334	0.67787325	1.0	2572	tags=58%, list=35%, signal=89%
REACTOME_DOWNREGULATION_OF_SMAD2_3_SMAD4_TRANSCRIPTIONAL_ACTIVITY	REACTOME_DOWNREGULATION_OF_SMAD2_3_SMAD4_TRANSCRIPTIONAL_ACTIVITY		13	0.47904366	1.1413707	0.30780143	0.6788685	1.0	2768	tags=54%, list=37%, signal=86%
SPIRA_SMOKERS_LUNG_CANCER_DN	SPIRA_SMOKERS_LUNG_CANCER_DN		15	0.48265773	1.1408792	0.29132792	0.67984533	1.0	2892	tags=53%, list=39%, signal=87%
CADWELL_ATG16L1_TARGETS_DN	CADWELL_ATG16L1_TARGETS_DN		27	0.4125942	1.1408558	0.28865978	0.6792467	1.0	1245	tags=26%, list=17%, signal=31%
MAGRANGEAS_MULTIPLE_MYELOMA_IGG_VS_IGA_DN	MAGRANGEAS_MULTIPLE_MYELOMA_IGG_VS_IGA_DN		19	0.44579273	1.140725	0.3115183	0.67901427	1.0	74	tags=11%, list=1%, signal=11%
PID_MYC_PATHWAY	PID_MYC_PATHWAY		19	0.44463506	1.1405294	0.31323722	0.6789848	1.0	2442	tags=47%, list=33%, signal=70%
OUYANG_PROSTATE_CANCER_MARKERS	OUYANG_PROSTATE_CANCER_MARKERS		12	0.48872057	1.1404083	0.3	0.6786805	1.0	890	tags=33%, list=12%, signal=38%
FARMER_BREAST_CANCER_APOCRINE_VS_LUMINAL	FARMER_BREAST_CANCER_APOCRINE_VS_LUMINAL		210	0.317081	1.1403996	0.20020428	0.6780446	1.0	1254	tags=20%, list=17%, signal=23%
DAZARD_RESPONSE_TO_UV_SCC_DN	DAZARD_RESPONSE_TO_UV_SCC_DN		96	0.3390135	1.139631	0.25292242	0.6798923	1.0	1441	tags=27%, list=19%, signal=33%
REACTOME_CIRCADIAN_REPRESSION_OF_EXPRESSION_BY_REV_ERBA	REACTOME_CIRCADIAN_REPRESSION_OF_EXPRESSION_BY_REV_ERBA		13	0.4886121	1.1395816	0.31223628	0.67939514	1.0	1685	tags=46%, list=23%, signal=60%
REACTOME_RESOLUTION_OF_AP_SITES_VIA_THE_SINGLE_NUCLEOTIDE_REPLACEMENT_PATHWAY	REACTOME_RESOLUTION_OF_AP_SITES_VIA_THE_SINGLE_NUCLEOTIDE_REPLACEMENT_PATHWAY		10	0.5183847	1.1391333	0.3068493	0.6801816	1.0	3364	tags=80%, list=45%, signal=146%
LEI_MYB_TARGETS	LEI_MYB_TARGETS		246	0.3169325	1.1389768	0.1871821	0.6800357	1.0	2505	tags=38%, list=34%, signal=55%
RAO_BOUND_BY_SALL4_ISOFORM_A	RAO_BOUND_BY_SALL4_ISOFORM_A		70	0.3527064	1.1383454	0.27872583	0.6813798	1.0	1975	tags=39%, list=27%, signal=52%
HUANG_DASATINIB_RESISTANCE_DN	HUANG_DASATINIB_RESISTANCE_DN		37	0.38942176	1.1380568	0.28867236	0.68165106	1.0	1204	tags=27%, list=16%, signal=32%
DACOSTA_UV_RESPONSE_VIA_ERCC3_UP	DACOSTA_UV_RESPONSE_VIA_ERCC3_UP		236	0.32044607	1.1379559	0.18979591	0.6813107	1.0	1400	tags=22%, list=19%, signal=26%
HAHTOLA_MYCOSIS_FUNGOIDES_UP	HAHTOLA_MYCOSIS_FUNGOIDES_UP		14	0.475181	1.137594	0.31983805	0.6818004	1.0	156	tags=14%, list=2%, signal=15%
TONG_INTERACT_WITH_PTTG1	TONG_INTERACT_WITH_PTTG1		27	0.41355962	1.1375226	0.3063291	0.68137634	1.0	214	tags=11%, list=3%, signal=11%
MIPS_18S_U11_U12_SNRNP	MIPS_18S_U11_U12_SNRNP		15	0.46986786	1.1373724	0.3098782	0.68120396	1.0	3502	tags=80%, list=47%, signal=151%
KEGG_MELANOMA	KEGG_MELANOMA		34	0.39424363	1.137365	0.29310346	0.6805701	1.0	2466	tags=53%, list=33%, signal=79%
REACTOME_KERATAN_SULFATE_BIOSYNTHESIS	REACTOME_KERATAN_SULFATE_BIOSYNTHESIS		14	0.4743376	1.1373266	0.30257803	0.6800349	1.0	337	tags=14%, list=5%, signal=15%
WEI_MIR34A_TARGETS	WEI_MIR34A_TARGETS		82	0.34795764	1.1362116	0.2546652	0.6829121	1.0	1889	tags=34%, list=25%, signal=45%
WIKMAN_ASBESTOS_LUNG_CANCER_DN	WIKMAN_ASBESTOS_LUNG_CANCER_DN		18	0.44526008	1.1359801	0.31529093	0.6829831	1.0	1215	tags=33%, list=16%, signal=40%
LOPEZ_TRANSLATION_VIA_FN1_SIGNALING	LOPEZ_TRANSLATION_VIA_FN1_SIGNALING		29	0.40884605	1.1357251	0.29850745	0.68315727	1.0	2034	tags=41%, list=27%, signal=57%
TOMLINS_PROSTATE_CANCER_UP	TOMLINS_PROSTATE_CANCER_UP		35	0.39462063	1.1356876	0.29562044	0.68264943	1.0	2590	tags=46%, list=35%, signal=70%
DELACROIX_RAR_TARGETS_UP	DELACROIX_RAR_TARGETS_UP		27	0.41095066	1.1355028	0.2982456	0.68255746	1.0	1007	tags=22%, list=14%, signal=26%
VANOEVELEN_MYOGENESIS_SIN3A_TARGETS	VANOEVELEN_MYOGENESIS_SIN3A_TARGETS		118	0.33353338	1.1354305	0.23101604	0.68215203	1.0	1856	tags=26%, list=25%, signal=34%
CREIGHTON_ENDOCRINE_THERAPY_RESISTANCE_2	CREIGHTON_ENDOCRINE_THERAPY_RESISTANCE_2		109	0.3368539	1.1346425	0.24672489	0.68404	1.0	1466	tags=28%, list=20%, signal=34%
CHEOK_RESPONSE_TO_MERCAPTOPURINE_DN	CHEOK_RESPONSE_TO_MERCAPTOPURINE_DN		16	0.45418298	1.1345948	0.30027175	0.68354106	1.0	86	tags=13%, list=1%, signal=13%
GOLDRATH_IMMUNE_MEMORY	GOLDRATH_IMMUNE_MEMORY		36	0.39051548	1.1337637	0.3007335	0.6854698	1.0	792	tags=22%, list=11%, signal=25%
FIRESTEIN_PROLIFERATION	FIRESTEIN_PROLIFERATION		71	0.35461828	1.133636	0.2733485	0.6852042	1.0	2328	tags=42%, list=31%, signal=61%
REACTOME_MRNA_DECAY_BY_5_TO_3_EXORIBONUCLEASE	REACTOME_MRNA_DECAY_BY_5_TO_3_EXORIBONUCLEASE		10	0.51317567	1.1331197	0.313783	0.68619555	1.0	2848	tags=90%, list=38%, signal=146%
LEE_DIFFERENTIATING_T_LYMPHOCYTE	LEE_DIFFERENTIATING_T_LYMPHOCYTE		112	0.3340739	1.1329569	0.24709609	0.6860655	1.0	2716	tags=47%, list=37%, signal=73%
BERTUCCI_INVASIVE_CARCINOMA_DUCTAL_VS_LOBULAR_UP	BERTUCCI_INVASIVE_CARCINOMA_DUCTAL_VS_LOBULAR_UP		13	0.47934687	1.1326793	0.30640668	0.68634135	1.0	514	tags=23%, list=7%, signal=25%
DEN_INTERACT_WITH_LCA5	DEN_INTERACT_WITH_LCA5		18	0.44497523	1.1321408	0.34054053	0.6874923	1.0	3070	tags=67%, list=41%, signal=113%
DEBIASI_APOPTOSIS_BY_REOVIRUS_INFECTION_DN	DEBIASI_APOPTOSIS_BY_REOVIRUS_INFECTION_DN		214	0.31460568	1.1314491	0.21501014	0.6890379	1.0	1839	tags=29%, list=25%, signal=38%
WILLERT_WNT_SIGNALING	WILLERT_WNT_SIGNALING		17	0.453082	1.1313545	0.3084239	0.68870205	1.0	1240	tags=29%, list=17%, signal=35%
REACTOME_ACTIVATED_NOTCH1_TRANSMITS_SIGNAL_TO_THE_NUCLEUS	REACTOME_ACTIVATED_NOTCH1_TRANSMITS_SIGNAL_TO_THE_NUCLEUS		11	0.49612162	1.131127	0.3250346	0.6887884	1.0	2346	tags=55%, list=32%, signal=80%
DAIRKEE_TERT_TARGETS_UP	DAIRKEE_TERT_TARGETS_UP		246	0.3150892	1.1294409	0.1928934	0.6934944	1.0	2250	tags=31%, list=30%, signal=43%
GENTILE_UV_RESPONSE_CLUSTER_D7	GENTILE_UV_RESPONSE_CLUSTER_D7		33	0.3997767	1.1290756	0.30099502	0.6940416	1.0	2419	tags=45%, list=33%, signal=67%
HELLER_HDAC_TARGETS_UP	HELLER_HDAC_TARGETS_UP		216	0.31686193	1.1285944	0.22301425	0.69502246	1.0	1109	tags=15%, list=15%, signal=17%
KEGG_SELENOAMINO_ACID_METABOLISM	KEGG_SELENOAMINO_ACID_METABOLISM		18	0.4448486	1.1285157	0.30428955	0.6946	1.0	2661	tags=56%, list=36%, signal=86%
MIPS_40S_RIBOSOMAL_SUBUNIT_CYTOPLASMIC	MIPS_40S_RIBOSOMAL_SUBUNIT_CYTOPLASMIC		27	0.40852037	1.1277338	0.30818415	0.69649225	1.0	4054	tags=85%, list=55%, signal=187%
MARTINEZ_RB1_AND_TP53_TARGETS_DN	MARTINEZ_RB1_AND_TP53_TARGETS_DN		296	0.31094292	1.1270432	0.18072289	0.6980945	1.0	1769	tags=29%, list=24%, signal=36%
SASAKI_TARGETS_OF_TP73_AND_TP63	SASAKI_TARGETS_OF_TP73_AND_TP63		10	0.512581	1.1266387	0.32033426	0.6987655	1.0	1714	tags=30%, list=23%, signal=39%
ZHONG_RESPONSE_TO_AZACITIDINE_AND_TSA_UP	ZHONG_RESPONSE_TO_AZACITIDINE_AND_TSA_UP		105	0.33659878	1.1266311	0.27589968	0.6981368	1.0	890	tags=18%, list=12%, signal=20%
OHM_METHYLATED_IN_ADULT_CANCERS	OHM_METHYLATED_IN_ADULT_CANCERS		16	0.45610598	1.1255292	0.32384825	0.7010703	1.0	2534	tags=50%, list=34%, signal=76%
REACTOME_G_ALPHA_Q_SIGNALLING_EVENTS	REACTOME_G_ALPHA_Q_SIGNALLING_EVENTS		58	0.36072212	1.1253507	0.2860412	0.7010162	1.0	1141	tags=24%, list=15%, signal=28%
NIELSEN_GIST	NIELSEN_GIST		56	0.36113855	1.1251615	0.29732868	0.7009667	1.0	1679	tags=25%, list=23%, signal=32%
REACTOME_SLC_MEDIATED_TRANSMEMBRANE_TRANSPORT	REACTOME_SLC_MEDIATED_TRANSMEMBRANE_TRANSPORT		86	0.34235606	1.1249919	0.27292818	0.70084864	1.0	1840	tags=36%, list=25%, signal=47%
HOSHIDA_LIVER_CANCER_SURVIVAL_UP	HOSHIDA_LIVER_CANCER_SURVIVAL_UP		45	0.37470087	1.1249647	0.28807557	0.7002991	1.0	2667	tags=53%, list=36%, signal=83%
CHICAS_RB1_TARGETS_CONFLUENT	CHICAS_RB1_TARGETS_CONFLUENT		334	0.30803826	1.124636	0.19738168	0.7007127	1.0	1544	tags=25%, list=21%, signal=31%
BIOCARTA_KERATINOCYTE_PATHWAY	BIOCARTA_KERATINOCYTE_PATHWAY		26	0.41830987	1.1244895	0.33164558	0.70052516	1.0	1696	tags=35%, list=23%, signal=45%
KEGG_P53_SIGNALING_PATHWAY	KEGG_P53_SIGNALING_PATHWAY		43	0.375452	1.12393	0.28944248	0.70172375	1.0	1590	tags=30%, list=21%, signal=38%
KEGG_SYSTEMIC_LUPUS_ERYTHEMATOSUS	KEGG_SYSTEMIC_LUPUS_ERYTHEMATOSUS		43	0.37757754	1.1233467	0.30896226	0.7029161	1.0	587	tags=19%, list=8%, signal=20%
SENGUPTA_NASOPHARYNGEAL_CARCINOMA_WITH_LMP1_UP	SENGUPTA_NASOPHARYNGEAL_CARCINOMA_WITH_LMP1_UP		179	0.3151684	1.1232079	0.22877847	0.7027088	1.0	1939	tags=35%, list=26%, signal=46%
REACTOME_RIG_I_MDA5_MEDIATED_INDUCTION_OF_IFN_ALPHA_BETA_PATHWAYS	REACTOME_RIG_I_MDA5_MEDIATED_INDUCTION_OF_IFN_ALPHA_BETA_PATHWAYS		33	0.39199618	1.1231946	0.3	0.7020962	1.0	2790	tags=52%, list=38%, signal=82%
REACTOME_CLASS_I_MHC_MEDIATED_ANTIGEN_PROCESSING_PRESENTATION	REACTOME_CLASS_I_MHC_MEDIATED_ANTIGEN_PROCESSING_PRESENTATION		159	0.31899384	1.1230083	0.23962656	0.70206904	1.0	2890	tags=41%, list=39%, signal=65%
CHESLER_BRAIN_QTL_CIS	CHESLER_BRAIN_QTL_CIS		48	0.37252182	1.1228622	0.2978236	0.7018733	1.0	1534	tags=29%, list=21%, signal=37%
YAO_TEMPORAL_RESPONSE_TO_PROGESTERONE_CLUSTER_11	YAO_TEMPORAL_RESPONSE_TO_PROGESTERONE_CLUSTER_11		69	0.3466216	1.1227291	0.28911564	0.70167285	1.0	2701	tags=48%, list=36%, signal=74%
NIKOLSKY_BREAST_CANCER_17Q11_Q21_AMPLICON	NIKOLSKY_BREAST_CANCER_17Q11_Q21_AMPLICON		47	0.37159547	1.1225188	0.30367735	0.7017139	1.0	318	tags=11%, list=4%, signal=11%
KEGG_NON_SMALL_CELL_LUNG_CANCER	KEGG_NON_SMALL_CELL_LUNG_CANCER		33	0.39098597	1.1224828	0.31801242	0.70119905	1.0	2555	tags=48%, list=34%, signal=74%
GOLUB_ALL_VS_AML_UP	GOLUB_ALL_VS_AML_UP		17	0.45075405	1.1218013	0.32885906	0.70275337	1.0	2871	tags=53%, list=39%, signal=86%
REACTOME_NOD1_2_SIGNALING_PATHWAY	REACTOME_NOD1_2_SIGNALING_PATHWAY		13	0.46798992	1.1209462	0.32664755	0.7049194	1.0	652	tags=23%, list=9%, signal=25%
WONG_IFNA2_RESISTANCE_UP	WONG_IFNA2_RESISTANCE_UP		12	0.48554918	1.1207491	0.33472222	0.70488656	1.0	1846	tags=58%, list=25%, signal=77%
MARTINEZ_RB1_TARGETS_UP	MARTINEZ_RB1_TARGETS_UP		365	0.30677786	1.1206131	0.1639839	0.70466864	1.0	1869	tags=29%, list=25%, signal=37%
WATTEL_AUTONOMOUS_THYROID_ADENOMA_UP	WATTEL_AUTONOMOUS_THYROID_ADENOMA_UP		38	0.38026437	1.120374	0.30493826	0.7048281	1.0	660	tags=18%, list=9%, signal=20%
BROWNE_HCMV_INFECTION_6HR_DN	BROWNE_HCMV_INFECTION_6HR_DN		93	0.3407219	1.120295	0.28540304	0.70444095	1.0	1196	tags=25%, list=16%, signal=29%
HOFFMANN_PRE_BI_TO_LARGE_PRE_BII_LYMPHOCYTE_UP	HOFFMANN_PRE_BI_TO_LARGE_PRE_BII_LYMPHOCYTE_UP		17	0.45123202	1.1200866	0.3395973	0.704453	1.0	1250	tags=24%, list=17%, signal=28%
FIGUEROA_AML_METHYLATION_CLUSTER_2_UP	FIGUEROA_AML_METHYLATION_CLUSTER_2_UP		24	0.42648453	1.1182071	0.33035713	0.7098507	1.0	1474	tags=33%, list=20%, signal=41%
PID_TGFBRPATHWAY	PID_TGFBRPATHWAY		30	0.398793	1.1181835	0.3135068	0.70927536	1.0	866	tags=20%, list=12%, signal=23%
CAFFAREL_RESPONSE_TO_THC_UP	CAFFAREL_RESPONSE_TO_THC_UP		24	0.41865453	1.1179845	0.32188296	0.7092916	1.0	2586	tags=46%, list=35%, signal=70%
MIPS_TFTC_COMPLEX	MIPS_TFTC_COMPLEX		12	0.48326614	1.1176947	0.35177305	0.7095572	1.0	1047	tags=42%, list=14%, signal=48%
REACTOME_ADAPTIVE_IMMUNE_SYSTEM	REACTOME_ADAPTIVE_IMMUNE_SYSTEM		310	0.30865335	1.1175566	0.18951613	0.7093648	1.0	1800	tags=24%, list=24%, signal=31%
LEE_LIVER_CANCER_MYC_UP	LEE_LIVER_CANCER_MYC_UP		39	0.37650383	1.1172557	0.32142857	0.7096615	1.0	776	tags=18%, list=10%, signal=20%
HOOI_ST7_TARGETS_UP	HOOI_ST7_TARGETS_UP		36	0.37565377	1.1172521	0.30900243	0.7090263	1.0	927	tags=22%, list=12%, signal=25%
KEGG_PENTOSE_PHOSPHATE_PATHWAY	KEGG_PENTOSE_PHOSPHATE_PATHWAY		18	0.4372678	1.1172352	0.3439575	0.70843947	1.0	1573	tags=33%, list=21%, signal=42%
REACTOME_DEADENYLATION_OF_MRNA	REACTOME_DEADENYLATION_OF_MRNA		14	0.46253192	1.1169162	0.3089655	0.7088116	1.0	2889	tags=57%, list=39%, signal=93%
RIZKI_TUMOR_INVASIVENESS_3D_DN	RIZKI_TUMOR_INVASIVENESS_3D_DN		163	0.32106018	1.1167042	0.25976768	0.708863	1.0	2401	tags=42%, list=32%, signal=60%
KEGG_PRIMARY_IMMUNODEFICIENCY	KEGG_PRIMARY_IMMUNODEFICIENCY		13	0.46905595	1.1165638	0.34555712	0.70866376	1.0	2474	tags=54%, list=33%, signal=81%
KEGG_VASCULAR_SMOOTH_MUSCLE_CONTRACTION	KEGG_VASCULAR_SMOOTH_MUSCLE_CONTRACTION		50	0.36565536	1.1164659	0.29694834	0.70833844	1.0	1542	tags=28%, list=21%, signal=35%
HE_PTEN_TARGETS_UP	HE_PTEN_TARGETS_UP		10	0.50700486	1.1163443	0.3366197	0.70807713	1.0	1285	tags=30%, list=17%, signal=36%
SCHLINGEMANN_SKIN_CARCINOGENESIS_TPA_UP	SCHLINGEMANN_SKIN_CARCINOGENESIS_TPA_UP		20	0.4372512	1.1153646	0.32793522	0.7104995	1.0	891	tags=30%, list=12%, signal=34%
PASINI_SUZ12_TARGETS_UP	PASINI_SUZ12_TARGETS_UP		44	0.36431232	1.1152351	0.30552292	0.71030027	1.0	1041	tags=23%, list=14%, signal=26%
WALLACE_PROSTATE_CANCER_UP	WALLACE_PROSTATE_CANCER_UP		14	0.46365258	1.1151603	0.3388203	0.7099173	1.0	2442	tags=57%, list=33%, signal=85%
REACTOME_INSULIN_RECEPTOR_SIGNALLING_CASCADE	REACTOME_INSULIN_RECEPTOR_SIGNALLING_CASCADE		43	0.37510985	1.1150471	0.30695444	0.70964015	1.0	1228	tags=21%, list=17%, signal=25%
TONKS_TARGETS_OF_RUNX1_RUNX1T1_FUSION_MONOCYTE_UP	TONKS_TARGETS_OF_RUNX1_RUNX1T1_FUSION_MONOCYTE_UP		155	0.3219136	1.1149288	0.26645768	0.7093687	1.0	2781	tags=45%, list=37%, signal=70%
KEGG_JAK_STAT_SIGNALING_PATHWAY	KEGG_JAK_STAT_SIGNALING_PATHWAY		50	0.3640534	1.1141479	0.3202312	0.7112529	1.0	1954	tags=34%, list=26%, signal=46%
LASTOWSKA_COAMPLIFIED_WITH_MYCN	LASTOWSKA_COAMPLIFIED_WITH_MYCN		25	0.41099995	1.1134995	0.3392857	0.7126801	1.0	793	tags=20%, list=11%, signal=22%
KYNG_DNA_DAMAGE_UP	KYNG_DNA_DAMAGE_UP		130	0.32353204	1.1134417	0.28418803	0.71221745	1.0	1530	tags=28%, list=21%, signal=35%
FLECHNER_PBL_KIDNEY_TRANSPLANT_REJECTED_VS_OK_DN	FLECHNER_PBL_KIDNEY_TRANSPLANT_REJECTED_VS_OK_DN		43	0.37003487	1.1131861	0.31610578	0.7124303	1.0	1865	tags=30%, list=25%, signal=40%
AZARE_STAT3_TARGETS	AZARE_STAT3_TARGETS		18	0.4399615	1.1126927	0.34935066	0.71339285	1.0	2267	tags=50%, list=30%, signal=72%
WELCSH_BRCA1_TARGETS_UP	WELCSH_BRCA1_TARGETS_UP		161	0.31898907	1.1126455	0.27863777	0.7129224	1.0	898	tags=12%, list=12%, signal=14%
SETLUR_PROSTATE_CANCER_TMPRSS2_ERG_FUSION_UP	SETLUR_PROSTATE_CANCER_TMPRSS2_ERG_FUSION_UP		47	0.36789823	1.1125865	0.32307693	0.71247655	1.0	1828	tags=40%, list=25%, signal=53%
GRESHOCK_CANCER_COPY_NUMBER_UP	GRESHOCK_CANCER_COPY_NUMBER_UP		191	0.3148876	1.1124102	0.24380165	0.7124164	1.0	2018	tags=37%, list=27%, signal=50%
NUYTTEN_NIPP1_TARGETS_DN	NUYTTEN_NIPP1_TARGETS_DN		464	0.300097	1.1116667	0.16316317	0.7141692	1.0	2193	tags=31%, list=29%, signal=42%
PID_RHOA_REG_PATHWAY	PID_RHOA_REG_PATHWAY		26	0.40550676	1.1112869	0.33291772	0.7147671	1.0	1159	tags=23%, list=16%, signal=27%
HOLLEMAN_ASPARAGINASE_RESISTANCE_B_ALL_UP	HOLLEMAN_ASPARAGINASE_RESISTANCE_B_ALL_UP		22	0.42064962	1.111126	0.3243243	0.7146283	1.0	3410	tags=73%, list=46%, signal=134%
MIPS_RNA_POLYMERASE_II_COMPLEX_CHROMATIN_STRUCTURE_MODIFYING_1	MIPS_RNA_POLYMERASE_II_COMPLEX_CHROMATIN_STRUCTURE_MODIFYING_1		10	0.502911	1.1102343	0.33873343	0.71678746	1.0	873	tags=20%, list=12%, signal=23%
BERENJENO_TRANSFORMED_BY_RHOA_FOREVER_UP	BERENJENO_TRANSFORMED_BY_RHOA_FOREVER_UP		17	0.43914342	1.1100432	0.33197832	0.7167907	1.0	2155	tags=41%, list=29%, signal=58%
PURBEY_TARGETS_OF_CTBP1_AND_SATB1_DN	PURBEY_TARGETS_OF_CTBP1_AND_SATB1_DN		92	0.33280158	1.1090939	0.31113538	0.7191993	1.0	1410	tags=24%, list=19%, signal=29%
TSENG_ADIPOGENIC_POTENTIAL_UP	TSENG_ADIPOGENIC_POTENTIAL_UP		21	0.42183143	1.1089678	0.33542714	0.71898603	1.0	1624	tags=38%, list=22%, signal=49%
BACOLOD_RESISTANCE_TO_ALKYLATING_AGENTS_DN	BACOLOD_RESISTANCE_TO_ALKYLATING_AGENTS_DN		47	0.36659616	1.1089658	0.3270366	0.7183541	1.0	1672	tags=36%, list=22%, signal=46%
REACTOME_SIGNALING_BY_TGF_BETA_RECEPTOR_COMPLEX	REACTOME_SIGNALING_BY_TGF_BETA_RECEPTOR_COMPLEX		40	0.37246314	1.1086959	0.30806845	0.7185962	1.0	3068	tags=52%, list=41%, signal=89%
VALK_AML_CLUSTER_16	VALK_AML_CLUSTER_16		18	0.44229457	1.1086078	0.35952064	0.71826625	1.0	1827	tags=50%, list=25%, signal=66%
SCHAEFFER_PROSTATE_DEVELOPMENT_6HR_DN	SCHAEFFER_PROSTATE_DEVELOPMENT_6HR_DN		316	0.30446255	1.1085602	0.222334	0.71779513	1.0	2386	tags=37%, list=32%, signal=53%
PENG_LEUCINE_DEPRIVATION_UP	PENG_LEUCINE_DEPRIVATION_UP		106	0.3272671	1.1079563	0.2858684	0.71910983	1.0	1825	tags=29%, list=25%, signal=38%
REACTOME_TRANSCRIPTIONAL_ACTIVITY_OF_SMAD2_SMAD3_SMAD4_HETEROTRIMER	REACTOME_TRANSCRIPTIONAL_ACTIVITY_OF_SMAD2_SMAD3_SMAD4_HETEROTRIMER		23	0.42032024	1.1071118	0.34837094	0.7212007	1.0	2768	tags=52%, list=37%, signal=83%
REACTOME_REGULATION_OF_MRNA_STABILITY_BY_PROTEINS_THAT_BIND_AU_RICH_ELEMENTS	REACTOME_REGULATION_OF_MRNA_STABILITY_BY_PROTEINS_THAT_BIND_AU_RICH_ELEMENTS		70	0.34311393	1.1069844	0.2997763	0.72095275	1.0	2890	tags=46%, list=39%, signal=74%
VALK_AML_CLUSTER_9	VALK_AML_CLUSTER_9		23	0.4194668	1.1067785	0.33676094	0.72100353	1.0	706	tags=26%, list=9%, signal=29%
LEE_METASTASIS_AND_ALTERNATIVE_SPLICING_DN	LEE_METASTASIS_AND_ALTERNATIVE_SPLICING_DN		27	0.40478605	1.1064589	0.32406288	0.7214227	1.0	1584	tags=33%, list=21%, signal=42%
YAGI_AML_WITH_T_9_11_TRANSLOCATION	YAGI_AML_WITH_T_9_11_TRANSLOCATION		87	0.33466542	1.1063998	0.29605263	0.7209579	1.0	2292	tags=38%, list=31%, signal=54%
KEGG_INSULIN_SIGNALING_PATHWAY	KEGG_INSULIN_SIGNALING_PATHWAY		79	0.33660287	1.105728	0.29834256	0.72247046	1.0	1160	tags=19%, list=16%, signal=22%
HENDRICKS_SMARCA4_TARGETS_UP	HENDRICKS_SMARCA4_TARGETS_UP		35	0.3802191	1.1054696	0.3435208	0.72265524	1.0	1574	tags=34%, list=21%, signal=43%
COWLING_MYCN_TARGETS	COWLING_MYCN_TARGETS		24	0.4079751	1.1054468	0.33290654	0.7220944	1.0	491	tags=17%, list=7%, signal=18%
PID_ERB_GENOMIC_PATHWAY	PID_ERB_GENOMIC_PATHWAY		12	0.47983804	1.1035267	0.35886526	0.7275375	1.0	2698	tags=50%, list=36%, signal=78%
DACOSTA_UV_RESPONSE_VIA_ERCC3_XPCS_DN	DACOSTA_UV_RESPONSE_VIA_ERCC3_XPCS_DN		56	0.35877064	1.1035163	0.3025701	0.72693664	1.0	1496	tags=34%, list=20%, signal=42%
HAHTOLA_MYCOSIS_FUNGOIDES_SKIN_DN	HAHTOLA_MYCOSIS_FUNGOIDES_SKIN_DN		22	0.41819057	1.1034125	0.3559322	0.7266155	1.0	87	tags=9%, list=1%, signal=9%
OUILLETTE_CLL_13Q14_DELETION_DN	OUILLETTE_CLL_13Q14_DELETION_DN		25	0.39966533	1.1032737	0.328	0.7264333	1.0	787	tags=24%, list=11%, signal=27%
KATSANOU_ELAVL1_TARGETS_DN	KATSANOU_ELAVL1_TARGETS_DN		72	0.3441002	1.1029115	0.32207206	0.726866	1.0	1489	tags=32%, list=20%, signal=40%
OSADA_ASCL1_TARGETS_UP	OSADA_ASCL1_TARGETS_UP		24	0.41154477	1.1028833	0.34575835	0.7263143	1.0	772	tags=21%, list=10%, signal=23%
HERNANDEZ_MITOTIC_ARREST_BY_DOCETAXEL_1_UP	HERNANDEZ_MITOTIC_ARREST_BY_DOCETAXEL_1_UP		24	0.40745893	1.1021516	0.3466495	0.72800016	1.0	483	tags=17%, list=6%, signal=18%
KUNINGER_IGF1_VS_PDGFB_TARGETS_DN	KUNINGER_IGF1_VS_PDGFB_TARGETS_DN		23	0.4113902	1.1019222	0.33546734	0.7281196	1.0	960	tags=26%, list=13%, signal=30%
CHANGOLKAR_H2AFY_TARGETS_DN	CHANGOLKAR_H2AFY_TARGETS_DN		16	0.44226503	1.1018136	0.34445927	0.7278198	1.0	2762	tags=63%, list=37%, signal=99%
REACTOME_SRP_DEPENDENT_COTRANSLATIONAL_PROTEIN_TARGETING_TO_MEMBRANE	REACTOME_SRP_DEPENDENT_COTRANSLATIONAL_PROTEIN_TARGETING_TO_MEMBRANE		91	0.33144617	1.1013926	0.30546623	0.7285794	1.0	4061	tags=76%, list=55%, signal=165%
OKAWA_NEUROBLASTOMA_1P36_31_DELETION	OKAWA_NEUROBLASTOMA_1P36_31_DELETION		14	0.46223092	1.1010766	0.34119278	0.7289255	1.0	2091	tags=43%, list=28%, signal=60%
LEIN_MIDBRAIN_MARKERS	LEIN_MIDBRAIN_MARKERS		33	0.38038537	1.1007034	0.34119105	0.72947466	1.0	1014	tags=24%, list=14%, signal=28%
VARELA_ZMPSTE24_TARGETS_UP	VARELA_ZMPSTE24_TARGETS_UP		28	0.38835225	1.1005652	0.3269962	0.72929794	1.0	1160	tags=25%, list=16%, signal=30%
NIKOLSKY_BREAST_CANCER_17Q21_Q25_AMPLICON	NIKOLSKY_BREAST_CANCER_17Q21_Q25_AMPLICON		146	0.31715515	1.1001892	0.2837838	0.72985345	1.0	2293	tags=32%, list=31%, signal=46%
SEMENZA_HIF1_TARGETS	SEMENZA_HIF1_TARGETS		27	0.39845675	1.098899	0.35796177	0.7334299	1.0	384	tags=15%, list=5%, signal=16%
HOLLMANN_APOPTOSIS_VIA_CD40_UP	HOLLMANN_APOPTOSIS_VIA_CD40_UP		151	0.31658524	1.0986516	0.2990556	0.7335935	1.0	2217	tags=32%, list=30%, signal=44%
KASLER_HDAC7_TARGETS_1_DN	KASLER_HDAC7_TARGETS_1_DN		13	0.46073973	1.0983777	0.3603352	0.7338381	1.0	587	tags=23%, list=8%, signal=25%
PODAR_RESPONSE_TO_ADAPHOSTIN_DN	PODAR_RESPONSE_TO_ADAPHOSTIN_DN		13	0.4624918	1.097321	0.37651822	0.7365857	1.0	1635	tags=46%, list=22%, signal=59%
DORN_ADENOVIRUS_INFECTION_12HR_UP	DORN_ADENOVIRUS_INFECTION_12HR_UP		16	0.44324386	1.0969679	0.35535008	0.73708946	1.0	659	tags=19%, list=9%, signal=21%
REACTOME_IMMUNE_SYSTEM	REACTOME_IMMUNE_SYSTEM		492	0.29864684	1.0967205	0.19539078	0.7372468	1.0	1804	tags=25%, list=24%, signal=31%
SCHAEFFER_PROSTATE_DEVELOPMENT_12HR_UP	SCHAEFFER_PROSTATE_DEVELOPMENT_12HR_UP		59	0.35086238	1.0962015	0.3206459	0.7382639	1.0	963	tags=25%, list=13%, signal=29%
MIKKELSEN_ES_HCP_WITH_H3_UNMETHYLATED	MIKKELSEN_ES_HCP_WITH_H3_UNMETHYLATED		11	0.4835305	1.0961862	0.36914602	0.73767215	1.0	899	tags=36%, list=12%, signal=41%
YAO_TEMPORAL_RESPONSE_TO_PROGESTERONE_CLUSTER_17	YAO_TEMPORAL_RESPONSE_TO_PROGESTERONE_CLUSTER_17		138	0.31465125	1.0957582	0.30857742	0.7384239	1.0	2923	tags=41%, list=39%, signal=66%
SHETH_LIVER_CANCER_VS_TXNIP_LOSS_PAM5	SHETH_LIVER_CANCER_VS_TXNIP_LOSS_PAM5		20	0.41809413	1.0950272	0.35732648	0.7401475	1.0	2110	tags=45%, list=28%, signal=63%
DAIRKEE_CANCER_PRONE_RESPONSE_BPA	DAIRKEE_CANCER_PRONE_RESPONSE_BPA		37	0.37409645	1.0942948	0.34258142	0.7418911	1.0	3058	tags=51%, list=41%, signal=87%
WANG_LMO4_TARGETS_DN	WANG_LMO4_TARGETS_DN		172	0.31100956	1.0929002	0.29089028	0.74567777	1.0	3176	tags=49%, list=43%, signal=83%
CHNG_MULTIPLE_MYELOMA_HYPERPLOID_DN	CHNG_MULTIPLE_MYELOMA_HYPERPLOID_DN		22	0.4106697	1.0925922	0.35714287	0.7460531	1.0	3577	tags=68%, list=48%, signal=131%
REACTOME_PI3K_CASCADE	REACTOME_PI3K_CASCADE		30	0.3896273	1.0921816	0.35235733	0.74671185	1.0	751	tags=17%, list=10%, signal=18%
QI_HYPOXIA_TARGETS_OF_HIF1A_AND_FOXA2	QI_HYPOXIA_TARGETS_OF_HIF1A_AND_FOXA2		23	0.4032059	1.0918397	0.35204083	0.7471646	1.0	1938	tags=35%, list=26%, signal=47%
OSMAN_BLADDER_CANCER_UP	OSMAN_BLADDER_CANCER_UP		230	0.3028567	1.0917693	0.27393076	0.74673843	1.0	2102	tags=32%, list=28%, signal=43%
DURCHDEWALD_SKIN_CARCINOGENESIS_UP	DURCHDEWALD_SKIN_CARCINOGENESIS_UP		39	0.37130985	1.0917321	0.3493976	0.746231	1.0	1038	tags=21%, list=14%, signal=24%
AMUNDSON_POOR_SURVIVAL_AFTER_GAMMA_RADIATION_2G	AMUNDSON_POOR_SURVIVAL_AFTER_GAMMA_RADIATION_2G		117	0.32361138	1.091671	0.31617647	0.745799	1.0	2657	tags=42%, list=36%, signal=64%
BREUHAHN_GROWTH_FACTOR_SIGNALING_IN_LIVER_CANCER	BREUHAHN_GROWTH_FACTOR_SIGNALING_IN_LIVER_CANCER		10	0.49207684	1.0915164	0.37446198	0.74563426	1.0	2216	tags=60%, list=30%, signal=85%
MOOTHA_HUMAN_MITODB_6_2002	MOOTHA_HUMAN_MITODB_6_2002		336	0.29999965	1.0913498	0.24321608	0.74551564	1.0	2429	tags=30%, list=33%, signal=42%
RICKMAN_TUMOR_DIFFERENTIATED_MODERATELY_VS_POORLY_UP	RICKMAN_TUMOR_DIFFERENTIATED_MODERATELY_VS_POORLY_UP		60	0.34321707	1.091293	0.33636364	0.745082	1.0	1482	tags=25%, list=20%, signal=31%
LIU_SOX4_TARGETS_UP	LIU_SOX4_TARGETS_UP		92	0.3285515	1.0894874	0.33989072	0.75024706	1.0	1664	tags=29%, list=22%, signal=37%
CHARAFE_BREAST_CANCER_LUMINAL_VS_BASAL_UP	CHARAFE_BREAST_CANCER_LUMINAL_VS_BASAL_UP		189	0.30496222	1.0881624	0.30650154	0.7538464	1.0	1498	tags=25%, list=20%, signal=30%
REACTOME_SIGNALING_BY_RHO_GTPASES	REACTOME_SIGNALING_BY_RHO_GTPASES		53	0.35621	1.0880631	0.34762457	0.7535637	1.0	1513	tags=26%, list=20%, signal=33%
ZHANG_ANTIVIRAL_RESPONSE_TO_RIBAVIRIN_UP	ZHANG_ANTIVIRAL_RESPONSE_TO_RIBAVIRIN_UP		22	0.41500983	1.0878056	0.37435898	0.7537854	1.0	1971	tags=45%, list=26%, signal=62%
KANG_IMMORTALIZED_BY_TERT_UP	KANG_IMMORTALIZED_BY_TERT_UP		45	0.35918167	1.0866723	0.36310905	0.7568069	1.0	813	tags=22%, list=11%, signal=25%
NIKOLSKY_OVERCONNECTED_IN_BREAST_CANCER	NIKOLSKY_OVERCONNECTED_IN_BREAST_CANCER		11	0.49246082	1.0866723	0.37361112	0.75616556	1.0	2193	tags=64%, list=29%, signal=90%
REACTOME_GPCR_LIGAND_BINDING	REACTOME_GPCR_LIGAND_BINDING		107	0.32049227	1.0862911	0.318872	0.756698	1.0	1483	tags=26%, list=20%, signal=32%
IKEDA_MIR30_TARGETS_UP	IKEDA_MIR30_TARGETS_UP		74	0.33614948	1.0856073	0.3445567	0.75826657	1.0	2212	tags=36%, list=30%, signal=51%
NIKOLSKY_BREAST_CANCER_16Q24_AMPLICON	NIKOLSKY_BREAST_CANCER_16Q24_AMPLICON		27	0.393136	1.0853765	0.35227272	0.75840265	1.0	1909	tags=26%, list=26%, signal=35%
REACTOME_BRANCHED_CHAIN_AMINO_ACID_CATABOLISM	REACTOME_BRANCHED_CHAIN_AMINO_ACID_CATABOLISM		11	0.48073465	1.0849864	0.36864406	0.7589709	1.0	566	tags=18%, list=8%, signal=20%
KUMAR_PATHOGEN_LOAD_BY_MACROPHAGES	KUMAR_PATHOGEN_LOAD_BY_MACROPHAGES		98	0.3243173	1.08475	0.34056398	0.7590982	1.0	857	tags=13%, list=12%, signal=15%
RIZ_ERYTHROID_DIFFERENTIATION_HEMGN	RIZ_ERYTHROID_DIFFERENTIATION_HEMGN		13	0.46305665	1.0844012	0.3737931	0.75953466	1.0	1643	tags=54%, list=22%, signal=69%
NIKOLSKY_BREAST_CANCER_20Q11_AMPLICON	NIKOLSKY_BREAST_CANCER_20Q11_AMPLICON		17	0.42648587	1.0832607	0.37921727	0.7625622	1.0	2506	tags=53%, list=34%, signal=80%
EINAV_INTERFERON_SIGNATURE_IN_CANCER	EINAV_INTERFERON_SIGNATURE_IN_CANCER		16	0.4426045	1.083244	0.36980608	0.7619721	1.0	1059	tags=31%, list=14%, signal=36%
HU_GENOTOXIN_ACTION_DIRECT_VS_INDIRECT_4HR	HU_GENOTOXIN_ACTION_DIRECT_VS_INDIRECT_4HR		21	0.4183195	1.082964	0.39577836	0.76224107	1.0	18	tags=5%, list=0%, signal=5%
REACTOME_MUSCLE_CONTRACTION	REACTOME_MUSCLE_CONTRACTION		19	0.42789033	1.0818568	0.3718791	0.7650555	1.0	2363	tags=42%, list=32%, signal=62%
MARTINEZ_TP53_TARGETS_DN	MARTINEZ_TP53_TARGETS_DN		289	0.29948533	1.0802327	0.28370222	0.7695691	1.0	1769	tags=28%, list=24%, signal=36%
HELLER_HDAC_TARGETS_SILENCED_BY_METHYLATION_DN	HELLER_HDAC_TARGETS_SILENCED_BY_METHYLATION_DN		193	0.30446103	1.0802277	0.3137255	0.7689355	1.0	1590	tags=26%, list=21%, signal=33%
MIPS_DRIP_COMPLEX	MIPS_DRIP_COMPLEX		10	0.4899002	1.0801921	0.36760563	0.76841134	1.0	2469	tags=60%, list=33%, signal=90%
HAN_JNK_SINGALING_UP	HAN_JNK_SINGALING_UP		22	0.4075147	1.0801047	0.3846154	0.7680373	1.0	1643	tags=36%, list=22%, signal=47%
LIEN_BREAST_CARCINOMA_METAPLASTIC	LIEN_BREAST_CARCINOMA_METAPLASTIC		24	0.39867073	1.0792797	0.37531808	0.7700025	1.0	1099	tags=25%, list=15%, signal=29%
DOUGLAS_BMI1_TARGETS_UP	DOUGLAS_BMI1_TARGETS_UP		310	0.29638082	1.078502	0.3090909	0.77186245	1.0	2156	tags=34%, list=29%, signal=45%
CREIGHTON_ENDOCRINE_THERAPY_RESISTANCE_4	CREIGHTON_ENDOCRINE_THERAPY_RESISTANCE_4		175	0.30911332	1.0780455	0.33058703	0.77265507	1.0	1090	tags=18%, list=15%, signal=21%
GRAESSMANN_RESPONSE_TO_MC_AND_SERUM_DEPRIVATION_UP	GRAESSMANN_RESPONSE_TO_MC_AND_SERUM_DEPRIVATION_UP		101	0.31991953	1.0777092	0.34304208	0.7730696	1.0	1482	tags=27%, list=20%, signal=33%
MASRI_RESISTANCE_TO_TAMOXIFEN_AND_AROMATASE_INHIBITORS_DN	MASRI_RESISTANCE_TO_TAMOXIFEN_AND_AROMATASE_INHIBITORS_DN		16	0.4407019	1.0765153	0.37958115	0.7762526	1.0	2297	tags=50%, list=31%, signal=72%
MATTIOLI_MULTIPLE_MYELOMA_SUBGROUPS	MATTIOLI_MULTIPLE_MYELOMA_SUBGROUPS		15	0.44142592	1.0763696	0.37532467	0.7760772	1.0	727	tags=27%, list=10%, signal=29%
BILD_MYC_ONCOGENIC_SIGNATURE	BILD_MYC_ONCOGENIC_SIGNATURE		112	0.32107195	1.076281	0.34051725	0.7757078	1.0	2022	tags=36%, list=27%, signal=48%
BROWNE_HCMV_INFECTION_12HR_DN	BROWNE_HCMV_INFECTION_12HR_DN		73	0.33201748	1.075083	0.3585746	0.77887064	1.0	588	tags=15%, list=8%, signal=16%
REACTOME_CYCLIN_E_ASSOCIATED_EVENTS_DURING_G1_S_TRANSITION_	REACTOME_CYCLIN_E_ASSOCIATED_EVENTS_DURING_G1_S_TRANSITION_		56	0.3458917	1.074979	0.366474	0.77854234	1.0	2890	tags=41%, list=39%, signal=67%
KONDO_PROSTATE_CANCER_HCP_WITH_H3K27ME3	KONDO_PROSTATE_CANCER_HCP_WITH_H3K27ME3		37	0.3660667	1.0749563	0.37220845	0.77796704	1.0	716	tags=16%, list=10%, signal=18%
GRANDVAUX_IRF3_TARGETS_DN	GRANDVAUX_IRF3_TARGETS_DN		13	0.4569009	1.0748831	0.3809524	0.7775567	1.0	1259	tags=23%, list=17%, signal=28%
KIM_WT1_TARGETS_8HR_DN	KIM_WT1_TARGETS_8HR_DN		82	0.3264336	1.0745707	0.3635359	0.7779079	1.0	754	tags=12%, list=10%, signal=13%
MIKKELSEN_MCV6_ICP_WITH_H3K4ME3_AND_H3K27ME3	MIKKELSEN_MCV6_ICP_WITH_H3K4ME3_AND_H3K27ME3		13	0.4542268	1.0745417	0.37483266	0.7773618	1.0	438	tags=23%, list=6%, signal=24%
RICKMAN_METASTASIS_UP	RICKMAN_METASTASIS_UP		183	0.30325407	1.0737118	0.3271795	0.77936655	1.0	1589	tags=22%, list=21%, signal=28%
ZHAN_MULTIPLE_MYELOMA_CD1_UP	ZHAN_MULTIPLE_MYELOMA_CD1_UP		23	0.4062737	1.0736427	0.3955322	0.7789335	1.0	1362	tags=30%, list=18%, signal=37%
WAKABAYASHI_ADIPOGENESIS_PPARG_RXRA_BOUND_8D	WAKABAYASHI_ADIPOGENESIS_PPARG_RXRA_BOUND_8D		445	0.293667	1.0734404	0.25751504	0.77894896	1.0	2142	tags=31%, list=29%, signal=41%
WESTON_VEGFA_TARGETS	WESTON_VEGFA_TARGETS		71	0.33124244	1.0734111	0.35307783	0.77839875	1.0	2132	tags=42%, list=29%, signal=59%
PARK_HSC_AND_MULTIPOTENT_PROGENITORS	PARK_HSC_AND_MULTIPOTENT_PROGENITORS		34	0.37162572	1.0731477	0.3670412	0.77856886	1.0	1343	tags=18%, list=18%, signal=21%
PEREZ_TP53_TARGETS	PEREZ_TP53_TARGETS		395	0.29447362	1.0719808	0.3016032	0.7817395	1.0	1326	tags=20%, list=18%, signal=23%
WANG_RESPONSE_TO_BEXAROTENE_UP	WANG_RESPONSE_TO_BEXAROTENE_UP		12	0.45517954	1.0715516	0.397541	0.7824289	1.0	1689	tags=33%, list=23%, signal=43%
LOPEZ_MESOTHELIOMA_SURVIVAL_DN	LOPEZ_MESOTHELIOMA_SURVIVAL_DN		11	0.47453836	1.0712711	0.40730336	0.7826302	1.0	30	tags=9%, list=0%, signal=9%
SESTO_RESPONSE_TO_UV_C4	SESTO_RESPONSE_TO_UV_C4		14	0.44896075	1.0709801	0.38337803	0.7829011	1.0	2097	tags=43%, list=28%, signal=60%
REACTOME_CIRCADIAN_CLOCK	REACTOME_CIRCADIAN_CLOCK		30	0.3803591	1.0699437	0.38964242	0.7856345	1.0	2060	tags=43%, list=28%, signal=60%
REACTOME_DEVELOPMENTAL_BIOLOGY	REACTOME_DEVELOPMENTAL_BIOLOGY		219	0.29850978	1.0697378	0.33367243	0.7856501	1.0	1542	tags=24%, list=21%, signal=29%
KIM_GLIS2_TARGETS_UP	KIM_GLIS2_TARGETS_UP		62	0.33473784	1.0696194	0.35763097	0.7853822	1.0	901	tags=23%, list=12%, signal=25%
IKEDA_MIR133_TARGETS_UP	IKEDA_MIR133_TARGETS_UP		35	0.37364128	1.0694556	0.39684466	0.7852821	1.0	3306	tags=66%, list=44%, signal=118%
IIZUKA_LIVER_CANCER_PROGRESSION_G1_G2_DN	IIZUKA_LIVER_CANCER_PROGRESSION_G1_G2_DN		24	0.39783752	1.0691361	0.37117347	0.7856979	1.0	2176	tags=38%, list=29%, signal=53%
REACTOME_ASPARAGINE_N_LINKED_GLYCOSYLATION	REACTOME_ASPARAGINE_N_LINKED_GLYCOSYLATION		44	0.3597267	1.0689509	0.37067938	0.7856453	1.0	1503	tags=23%, list=20%, signal=28%
ACEVEDO_LIVER_CANCER_WITH_H3K27ME3_DN	ACEVEDO_LIVER_CANCER_WITH_H3K27ME3_DN		50	0.35199106	1.0687264	0.38416764	0.78570807	1.0	1331	tags=28%, list=18%, signal=34%
MIPS_RNA_POLYMERASE_II_HOLOENZYME_COMPLEX	MIPS_RNA_POLYMERASE_II_HOLOENZYME_COMPLEX		19	0.41748154	1.068692	0.38836265	0.7851696	1.0	3712	tags=84%, list=50%, signal=168%
MARSHALL_VIRAL_INFECTION_RESPONSE_DN	MARSHALL_VIRAL_INFECTION_RESPONSE_DN		15	0.4379983	1.0682693	0.39452055	0.78594214	1.0	277	tags=13%, list=4%, signal=14%
REACTOME_IL_2_SIGNALING	REACTOME_IL_2_SIGNALING		21	0.411063	1.068081	0.39375	0.78590137	1.0	2256	tags=38%, list=30%, signal=55%
XU_CREBBP_TARGETS_UP	XU_CREBBP_TARGETS_UP		18	0.42403775	1.0679411	0.3851175	0.7857112	1.0	2011	tags=44%, list=27%, signal=61%
BOQUEST_STEM_CELL_CULTURED_VS_FRESH_UP	BOQUEST_STEM_CELL_CULTURED_VS_FRESH_UP		295	0.29714683	1.0679032	0.31690142	0.78517896	1.0	889	tags=16%, list=12%, signal=18%
DELLA_RESPONSE_TO_TSA_AND_BUTYRATE	DELLA_RESPONSE_TO_TSA_AND_BUTYRATE		18	0.41895354	1.0675699	0.38633376	0.78559375	1.0	8	tags=6%, list=0%, signal=6%
BOSCO_INTERFERON_INDUCED_ANTIVIRAL_MODULE	BOSCO_INTERFERON_INDUCED_ANTIVIRAL_MODULE		32	0.3750031	1.0675622	0.39405206	0.7849831	1.0	2424	tags=44%, list=33%, signal=65%
LIAO_HAVE_SOX4_BINDING_SITES	LIAO_HAVE_SOX4_BINDING_SITES		26	0.38707653	1.067289	0.39036757	0.7852161	1.0	867	tags=27%, list=12%, signal=30%
MIKKELSEN_ES_HCP_WITH_H3K27ME3	MIKKELSEN_ES_HCP_WITH_H3K27ME3		10	0.4889436	1.066166	0.3971831	0.78813803	1.0	2428	tags=50%, list=33%, signal=74%
BYSTRYKH_HEMATOPOIESIS_STEM_CELL_QTL_TRANS	BYSTRYKH_HEMATOPOIESIS_STEM_CELL_QTL_TRANS		490	0.29137516	1.066021	0.3026052	0.78793806	1.0	2163	tags=31%, list=29%, signal=41%
THUM_SYSTOLIC_HEART_FAILURE_DN	THUM_SYSTOLIC_HEART_FAILURE_DN		123	0.31452566	1.0659702	0.36008447	0.7874632	1.0	2176	tags=33%, list=29%, signal=46%
KEGG_WNT_SIGNALING_PATHWAY	KEGG_WNT_SIGNALING_PATHWAY		77	0.3253508	1.0659354	0.3852909	0.7869441	1.0	1781	tags=30%, list=24%, signal=39%
REACTOME_POTASSIUM_CHANNELS	REACTOME_POTASSIUM_CHANNELS		28	0.38343582	1.0659188	0.38916877	0.7863595	1.0	799	tags=18%, list=11%, signal=20%
SESTO_RESPONSE_TO_UV_C5	SESTO_RESPONSE_TO_UV_C5		40	0.36081827	1.0646601	0.37880632	0.78979677	1.0	2145	tags=38%, list=29%, signal=52%
BIOCARTA_CHEMICAL_PATHWAY	BIOCARTA_CHEMICAL_PATHWAY		14	0.4553301	1.0639453	0.39373296	0.79138035	1.0	1585	tags=36%, list=21%, signal=45%
KEGG_BASAL_TRANSCRIPTION_FACTORS	KEGG_BASAL_TRANSCRIPTION_FACTORS		20	0.40197715	1.0637807	0.39597315	0.7912556	1.0	2425	tags=60%, list=33%, signal=89%
POTTI_PACLITAXEL_SENSITIVITY	POTTI_PACLITAXEL_SENSITIVITY		25	0.40018296	1.0635507	0.39223057	0.79137987	1.0	1900	tags=36%, list=26%, signal=48%
REACTOME_PI_METABOLISM	REACTOME_PI_METABOLISM		29	0.3801866	1.0624521	0.40228426	0.794184	1.0	3067	tags=55%, list=41%, signal=94%
BIOCARTA_PML_PATHWAY	BIOCARTA_PML_PATHWAY		10	0.48288548	1.0623425	0.3941504	0.7939173	1.0	1606	tags=40%, list=22%, signal=51%
FLECHNER_PBL_KIDNEY_TRANSPLANT_REJECTED_VS_OK_UP	FLECHNER_PBL_KIDNEY_TRANSPLANT_REJECTED_VS_OK_UP		57	0.33602723	1.0623283	0.38171428	0.7933219	1.0	762	tags=14%, list=10%, signal=16%
PID_DELTANP63PATHWAY	PID_DELTANP63PATHWAY		21	0.40759632	1.0620915	0.3830645	0.79342955	1.0	57	tags=10%, list=1%, signal=10%
KARLSSON_TGFB1_TARGETS_UP	KARLSSON_TGFB1_TARGETS_UP		93	0.3220012	1.0615904	0.38183808	0.79436845	1.0	2499	tags=39%, list=34%, signal=58%
WANG_IMMORTALIZED_BY_HOXA9_AND_MEIS1_UP	WANG_IMMORTALIZED_BY_HOXA9_AND_MEIS1_UP		13	0.4493228	1.0613081	0.39972338	0.79464227	1.0	5	tags=8%, list=0%, signal=8%
REACTOME_IL_RECEPTOR_SHC_SIGNALING	REACTOME_IL_RECEPTOR_SHC_SIGNALING		12	0.46327138	1.0606751	0.42436975	0.7959728	1.0	1954	tags=42%, list=26%, signal=56%
LAU_APOPTOSIS_CDKN2A_UP	LAU_APOPTOSIS_CDKN2A_UP		44	0.35286954	1.0599873	0.38038278	0.7975161	1.0	1216	tags=23%, list=16%, signal=27%
LIU_BREAST_CANCER	LIU_BREAST_CANCER		13	0.44752568	1.0593404	0.40525588	0.7988326	1.0	2065	tags=38%, list=28%, signal=53%
ABE_VEGFA_TARGETS_30MIN	ABE_VEGFA_TARGETS_30MIN		21	0.40612024	1.058491	0.3987261	0.80093956	1.0	847	tags=19%, list=11%, signal=21%
REACTOME_TRANSPORT_TO_THE_GOLGI_AND_SUBSEQUENT_MODIFICATION	REACTOME_TRANSPORT_TO_THE_GOLGI_AND_SUBSEQUENT_MODIFICATION		20	0.40667278	1.0577838	0.40848807	0.8025423	1.0	1780	tags=30%, list=24%, signal=39%
ST_JNK_MAPK_PATHWAY	ST_JNK_MAPK_PATHWAY		19	0.40785834	1.0575131	0.40078843	0.8027586	1.0	2856	tags=63%, list=38%, signal=102%
STEIN_ESRRA_TARGETS	STEIN_ESRRA_TARGETS		386	0.28815827	1.0571451	0.31923464	0.80329406	1.0	2250	tags=32%, list=30%, signal=43%
ZHOU_INFLAMMATORY_RESPONSE_FIMA_DN	ZHOU_INFLAMMATORY_RESPONSE_FIMA_DN		99	0.31796667	1.0570759	0.39370933	0.80286324	1.0	1832	tags=30%, list=25%, signal=40%
CHIBA_RESPONSE_TO_TSA	CHIBA_RESPONSE_TO_TSA		36	0.36792397	1.0569884	0.3881335	0.8025066	1.0	1396	tags=22%, list=19%, signal=27%
LIN_TUMOR_ESCAPE_FROM_IMMUNE_ATTACK	LIN_TUMOR_ESCAPE_FROM_IMMUNE_ATTACK		10	0.4751524	1.0566483	0.4122682	0.8029737	1.0	1408	tags=50%, list=19%, signal=62%
PID_SMAD2_3NUCLEARPATHWAY	PID_SMAD2_3NUCLEARPATHWAY		49	0.3427586	1.0566092	0.42303172	0.8024662	1.0	2001	tags=37%, list=27%, signal=50%
SENGUPTA_NASOPHARYNGEAL_CARCINOMA_WITH_LMP1_DN	SENGUPTA_NASOPHARYNGEAL_CARCINOMA_WITH_LMP1_DN		51	0.34767047	1.0564065	0.42087156	0.8024678	1.0	793	tags=22%, list=11%, signal=24%
MIPS_RNA_POLYMERASE_II_COMPLEX_CHROMATIN_STRUCTURE_MODIFYING_2	MIPS_RNA_POLYMERASE_II_COMPLEX_CHROMATIN_STRUCTURE_MODIFYING_2		12	0.4578683	1.0558996	0.41292876	0.8033583	1.0	2127	tags=42%, list=29%, signal=58%
IVANOVA_HEMATOPOIESIS_MATURE_CELL	IVANOVA_HEMATOPOIESIS_MATURE_CELL		140	0.30495474	1.055462	0.38145417	0.8041012	1.0	1505	tags=21%, list=20%, signal=26%
REACTOME_P75_NTR_RECEPTOR_MEDIATED_SIGNALLING	REACTOME_P75_NTR_RECEPTOR_MEDIATED_SIGNALLING		49	0.3418225	1.0554243	0.40047115	0.8035738	1.0	2753	tags=51%, list=37%, signal=80%
NAKAMURA_ADIPOGENESIS_LATE_UP	NAKAMURA_ADIPOGENESIS_LATE_UP		62	0.33626375	1.0550959	0.38425925	0.8039311	1.0	208	tags=10%, list=3%, signal=10%
BYSTROEM_CORRELATED_WITH_IL5_UP	BYSTROEM_CORRELATED_WITH_IL5_UP		35	0.35789177	1.0545627	0.4205379	0.8049262	1.0	1996	tags=37%, list=27%, signal=51%
IVANOVA_HEMATOPOIESIS_STEM_CELL_SHORT_TERM	IVANOVA_HEMATOPOIESIS_STEM_CELL_SHORT_TERM		18	0.41367146	1.0543684	0.39947438	0.8048913	1.0	2230	tags=50%, list=30%, signal=71%
PARENT_MTOR_SIGNALING_UP	PARENT_MTOR_SIGNALING_UP		364	0.2895111	1.0540686	0.34843907	0.8051812	1.0	1940	tags=26%, list=26%, signal=33%
LEE_AGING_MUSCLE_DN	LEE_AGING_MUSCLE_DN		32	0.36664525	1.053943	0.38922888	0.80489695	1.0	2003	tags=38%, list=27%, signal=51%
REN_ALVEOLAR_RHABDOMYOSARCOMA_UP	REN_ALVEOLAR_RHABDOMYOSARCOMA_UP		62	0.3320181	1.0531257	0.4155251	0.80689394	1.0	985	tags=19%, list=13%, signal=22%
ABE_VEGFA_TARGETS	ABE_VEGFA_TARGETS		11	0.4613409	1.053043	0.42008486	0.8065307	1.0	960	tags=27%, list=13%, signal=31%
INGRAM_SHH_TARGETS_UP	INGRAM_SHH_TARGETS_UP		71	0.3271165	1.0527067	0.39616254	0.80695957	1.0	1774	tags=35%, list=24%, signal=46%
TURASHVILI_BREAST_DUCTAL_CARCINOMA_VS_LOBULAR_NORMAL_DN	TURASHVILI_BREAST_DUCTAL_CARCINOMA_VS_LOBULAR_NORMAL_DN		37	0.35912934	1.0525955	0.40987656	0.8066681	1.0	1290	tags=35%, list=17%, signal=42%
RIGGI_EWING_SARCOMA_PROGENITOR_UP	RIGGI_EWING_SARCOMA_PROGENITOR_UP		193	0.2966701	1.0524663	0.36036962	0.8064348	1.0	898	tags=19%, list=12%, signal=21%
WILCOX_PRESPONSE_TO_ROGESTERONE_DN	WILCOX_PRESPONSE_TO_ROGESTERONE_DN		43	0.35499597	1.0514746	0.3995272	0.8089582	1.0	790	tags=23%, list=11%, signal=26%
KEGG_GLIOMA	KEGG_GLIOMA		37	0.35575145	1.0509475	0.40609756	0.80997676	1.0	2122	tags=41%, list=29%, signal=56%
GENTILE_UV_RESPONSE_CLUSTER_D8	GENTILE_UV_RESPONSE_CLUSTER_D8		36	0.3604722	1.050718	0.41454545	0.81006813	1.0	2570	tags=53%, list=35%, signal=80%
BONOME_OVARIAN_CANCER_SURVIVAL_SUBOPTIMAL_DEBULKING	BONOME_OVARIAN_CANCER_SURVIVAL_SUBOPTIMAL_DEBULKING		325	0.28881723	1.0504981	0.3684739	0.8101336	1.0	1610	tags=26%, list=22%, signal=32%
FONTAINE_THYROID_TUMOR_UNCERTAIN_MALIGNANCY_DN	FONTAINE_THYROID_TUMOR_UNCERTAIN_MALIGNANCY_DN		14	0.43237132	1.0500911	0.40331492	0.8107489	1.0	1230	tags=29%, list=17%, signal=34%
ZHANG_INTERFERON_RESPONSE	ZHANG_INTERFERON_RESPONSE		15	0.43359068	1.0491661	0.4375	0.81307465	1.0	2593	tags=60%, list=35%, signal=92%
REACTOME_TAK1_ACTIVATES_NFKB_BY_PHOSPHORYLATION_AND_ACTIVATION_OF_IKKS_COMPLEX	REACTOME_TAK1_ACTIVATES_NFKB_BY_PHOSPHORYLATION_AND_ACTIVATION_OF_IKKS_COMPLEX		11	0.4608806	1.0488694	0.41949153	0.8133505	1.0	612	tags=27%, list=8%, signal=30%
STEIN_ESTROGEN_RESPONSE_NOT_VIA_ESRRA	STEIN_ESTROGEN_RESPONSE_NOT_VIA_ESRRA		16	0.42495814	1.0485256	0.4281879	0.81379676	1.0	1571	tags=38%, list=21%, signal=47%
ROPERO_HDAC2_TARGETS	ROPERO_HDAC2_TARGETS		59	0.33118272	1.0485225	0.39655173	0.8131722	1.0	350	tags=10%, list=5%, signal=11%
CHIANG_LIVER_CANCER_SUBCLASS_POLYSOMY7_UP	CHIANG_LIVER_CANCER_SUBCLASS_POLYSOMY7_UP		22	0.3932036	1.0484277	0.41548386	0.8128018	1.0	1563	tags=32%, list=21%, signal=40%
MIPS_LARGE_DROSHA_COMPLEX	MIPS_LARGE_DROSHA_COMPLEX		19	0.41488338	1.0478367	0.43261456	0.8139611	1.0	2150	tags=42%, list=29%, signal=59%
GAVIN_FOXP3_TARGETS_CLUSTER_T7	GAVIN_FOXP3_TARGETS_CLUSTER_T7		76	0.32637295	1.0477736	0.4057971	0.81351686	1.0	2978	tags=46%, list=40%, signal=76%
PID_TNFPATHWAY	PID_TNFPATHWAY		30	0.37324455	1.047563	0.40097207	0.8135319	1.0	2777	tags=47%, list=37%, signal=74%
REACTOME_VIRAL_MESSENGER_RNA_SYNTHESIS	REACTOME_VIRAL_MESSENGER_RNA_SYNTHESIS		12	0.44847384	1.0475141	0.43459302	0.8130637	1.0	3712	tags=83%, list=50%, signal=166%
KAN_RESPONSE_TO_ARSENIC_TRIOXIDE	KAN_RESPONSE_TO_ARSENIC_TRIOXIDE		95	0.31485358	1.0473926	0.38663745	0.8128218	1.0	280	tags=9%, list=4%, signal=10%
BIOCARTA_TID_PATHWAY	BIOCARTA_TID_PATHWAY		10	0.46851724	1.0472722	0.4283647	0.8125501	1.0	1606	tags=40%, list=22%, signal=51%
REACTOME_FRS2_MEDIATED_CASCADE	REACTOME_FRS2_MEDIATED_CASCADE		15	0.43022525	1.0466539	0.4277929	0.81382495	1.0	832	tags=20%, list=11%, signal=22%
TERAMOTO_OPN_TARGETS_CLUSTER_6	TERAMOTO_OPN_TARGETS_CLUSTER_6		18	0.41389793	1.046603	0.40810812	0.81335545	1.0	365	tags=17%, list=5%, signal=17%
HUTTMANN_B_CLL_POOR_SURVIVAL_DN	HUTTMANN_B_CLL_POOR_SURVIVAL_DN		35	0.36538556	1.0463275	0.40682095	0.8136016	1.0	978	tags=23%, list=13%, signal=26%
HAN_SATB1_TARGETS_UP	HAN_SATB1_TARGETS_UP		233	0.2939781	1.0456152	0.38061225	0.8151405	1.0	1990	tags=35%, list=27%, signal=47%
SARTIPY_BLUNTED_BY_INSULIN_RESISTANCE_UP	SARTIPY_BLUNTED_BY_INSULIN_RESISTANCE_UP		13	0.4386891	1.0450412	0.44692737	0.8162583	1.0	1019	tags=23%, list=14%, signal=27%
PURBEY_TARGETS_OF_CTBP1_NOT_SATB1_DN	PURBEY_TARGETS_OF_CTBP1_NOT_SATB1_DN		227	0.29372597	1.0446336	0.37666327	0.8168984	1.0	1986	tags=31%, list=27%, signal=41%
SARTIPY_NORMAL_AT_INSULIN_RESISTANCE_UP	SARTIPY_NORMAL_AT_INSULIN_RESISTANCE_UP		18	0.41119748	1.0445937	0.41935483	0.8163943	1.0	384	tags=17%, list=5%, signal=18%
LEE_AGING_NEOCORTEX_DN	LEE_AGING_NEOCORTEX_DN		44	0.34837672	1.0438614	0.40448114	0.8180291	1.0	1405	tags=20%, list=19%, signal=25%
LINDGREN_BLADDER_CANCER_CLUSTER_1_UP	LINDGREN_BLADDER_CANCER_CLUSTER_1_UP		64	0.32849285	1.041929	0.41143498	0.8233926	1.0	554	tags=11%, list=7%, signal=12%
HELLER_SILENCED_BY_METHYLATION_UP	HELLER_SILENCED_BY_METHYLATION_UP		173	0.29872304	1.0417322	0.4037267	0.8233994	1.0	979	tags=18%, list=13%, signal=20%
WESTON_VEGFA_TARGETS_6HR	WESTON_VEGFA_TARGETS_6HR		40	0.35870564	1.0413877	0.42704627	0.82384366	1.0	2066	tags=48%, list=28%, signal=65%
KEGG_BLADDER_CANCER	KEGG_BLADDER_CANCER		29	0.37528738	1.0409542	0.42317075	0.8245893	1.0	2688	tags=52%, list=36%, signal=81%
BIOCARTA_WNT_PATHWAY	BIOCARTA_WNT_PATHWAY		16	0.42395106	1.0402415	0.43809524	0.82615095	1.0	2670	tags=56%, list=36%, signal=88%
CHIANG_LIVER_CANCER_SUBCLASS_CTNNB1_DN	CHIANG_LIVER_CANCER_SUBCLASS_CTNNB1_DN		94	0.31011066	1.0401932	0.41576675	0.8256574	1.0	1749	tags=34%, list=24%, signal=44%
ABRAHAM_ALPC_VS_MULTIPLE_MYELOMA_DN	ABRAHAM_ALPC_VS_MULTIPLE_MYELOMA_DN		16	0.4196778	1.0391654	0.4407008	0.8282345	1.0	612	tags=13%, list=8%, signal=14%
NAKAYAMA_FGF2_TARGETS	NAKAYAMA_FGF2_TARGETS		14	0.4333933	1.0389401	0.41866666	0.82833767	1.0	2028	tags=43%, list=27%, signal=59%
REACTOME_ANTIGEN_ACTIVATES_B_CELL_RECEPTOR_LEADING_TO_GENERATION_OF_SECOND_MESSENGERS	REACTOME_ANTIGEN_ACTIVATES_B_CELL_RECEPTOR_LEADING_TO_GENERATION_OF_SECOND_MESSENGERS		15	0.4318721	1.038714	0.41586867	0.8284129	1.0	2154	tags=53%, list=29%, signal=75%
PID_P38_MKK3_6PATHWAY	PID_P38_MKK3_6PATHWAY		17	0.4195484	1.0382404	0.4283871	0.8292439	1.0	2006	tags=35%, list=27%, signal=48%
NIELSEN_GIST_AND_SYNOVIAL_SARCOMA_UP	NIELSEN_GIST_AND_SYNOVIAL_SARCOMA_UP		13	0.4432079	1.0379887	0.4362881	0.8293392	1.0	1447	tags=38%, list=19%, signal=48%
IWANAGA_CARCINOGENESIS_BY_KRAS_PTEN_DN	IWANAGA_CARCINOGENESIS_BY_KRAS_PTEN_DN		172	0.29387462	1.0379523	0.40412372	0.8288151	1.0	2066	tags=34%, list=28%, signal=46%
OSWALD_HEMATOPOIETIC_STEM_CELL_IN_COLLAGEN_GEL_DN	OSWALD_HEMATOPOIETIC_STEM_CELL_IN_COLLAGEN_GEL_DN		170	0.29512635	1.0378244	0.39958376	0.82859	1.0	1349	tags=21%, list=18%, signal=25%
XU_RESPONSE_TO_TRETINOIN_UP	XU_RESPONSE_TO_TRETINOIN_UP		11	0.45574927	1.0374445	0.42979944	0.8291355	1.0	3512	tags=73%, list=47%, signal=138%
UROSEVIC_RESPONSE_TO_IMIQUIMOD	UROSEVIC_RESPONSE_TO_IMIQUIMOD		11	0.46231723	1.0372679	0.42857143	0.8290636	1.0	2593	tags=64%, list=35%, signal=98%
ZWANG_CLASS_2_TRANSIENTLY_INDUCED_BY_EGF	ZWANG_CLASS_2_TRANSIENTLY_INDUCED_BY_EGF		20	0.39645404	1.036362	0.44102564	0.83127636	1.0	1953	tags=50%, list=26%, signal=68%
GRADE_COLON_VS_RECTAL_CANCER_DN	GRADE_COLON_VS_RECTAL_CANCER_DN		31	0.36938667	1.0359147	0.4227848	0.8320603	1.0	976	tags=19%, list=13%, signal=22%
JISON_SICKLE_CELL_DISEASE_DN	JISON_SICKLE_CELL_DISEASE_DN		139	0.30048802	1.0355053	0.42528737	0.8326921	1.0	2896	tags=45%, list=39%, signal=73%
PID_IL2_STAT5PATHWAY	PID_IL2_STAT5PATHWAY		18	0.40703526	1.035468	0.4296875	0.8321691	1.0	1921	tags=33%, list=26%, signal=45%
WALLACE_PROSTATE_CANCER_RACE_DN	WALLACE_PROSTATE_CANCER_RACE_DN		51	0.33838215	1.0349504	0.43550295	0.8331407	1.0	1253	tags=31%, list=17%, signal=37%
CHAUHAN_RESPONSE_TO_METHOXYESTRADIOL_DN	CHAUHAN_RESPONSE_TO_METHOXYESTRADIOL_DN		89	0.31577286	1.0348084	0.42337376	0.8329298	1.0	2082	tags=27%, list=28%, signal=37%
REACTOME_NRAGE_SIGNALS_DEATH_THROUGH_JNK	REACTOME_NRAGE_SIGNALS_DEATH_THROUGH_JNK		23	0.38799766	1.0345595	0.42516556	0.83304137	1.0	1513	tags=26%, list=20%, signal=33%
REACTOME_CHONDROITIN_SULFATE_DERMATAN_SULFATE_METABOLISM	REACTOME_CHONDROITIN_SULFATE_DERMATAN_SULFATE_METABOLISM		23	0.3928462	1.0344532	0.43905637	0.832739	1.0	925	tags=26%, list=12%, signal=30%
CHEN_ETV5_TARGETS_SERTOLI	CHEN_ETV5_TARGETS_SERTOLI		11	0.4556558	1.0342112	0.4355301	0.8328339	1.0	1766	tags=45%, list=24%, signal=60%
YAO_TEMPORAL_RESPONSE_TO_PROGESTERONE_CLUSTER_7	YAO_TEMPORAL_RESPONSE_TO_PROGESTERONE_CLUSTER_7		52	0.33216128	1.0329429	0.4307334	0.836206	1.0	3744	tags=63%, list=50%, signal=127%
PID_TCR_PATHWAY	PID_TCR_PATHWAY		34	0.36267516	1.0328002	0.4301607	0.83599925	1.0	1921	tags=38%, list=26%, signal=51%
HUMMERICH_SKIN_CANCER_PROGRESSION_DN	HUMMERICH_SKIN_CANCER_PROGRESSION_DN		63	0.32860562	1.0325838	0.43329534	0.8360425	1.0	2753	tags=46%, list=37%, signal=72%
PID_S1P_META_PATHWAY	PID_S1P_META_PATHWAY		12	0.43754968	1.0322665	0.43375173	0.8363472	1.0	721	tags=17%, list=10%, signal=18%
PID_P53DOWNSTREAMPATHWAY	PID_P53DOWNSTREAMPATHWAY		80	0.31866875	1.0312767	0.40604028	0.838799	1.0	1630	tags=33%, list=22%, signal=41%
WANG_SMARCE1_TARGETS_DN	WANG_SMARCE1_TARGETS_DN		251	0.28747734	1.0299968	0.44162437	0.84205145	1.0	1969	tags=30%, list=26%, signal=39%
OUELLET_OVARIAN_CANCER_INVASIVE_VS_LMP_UP	OUELLET_OVARIAN_CANCER_INVASIVE_VS_LMP_UP		105	0.30629736	1.0294511	0.4339019	0.8430624	1.0	2244	tags=32%, list=30%, signal=46%
GAUSSMANN_MLL_AF4_FUSION_TARGETS_A_DN	GAUSSMANN_MLL_AF4_FUSION_TARGETS_A_DN		32	0.36177397	1.0284144	0.4359606	0.84558356	1.0	1462	tags=31%, list=20%, signal=39%
YOSHIOKA_LIVER_CANCER_EARLY_RECURRENCE_DN	YOSHIOKA_LIVER_CANCER_EARLY_RECURRENCE_DN		29	0.3669955	1.0280378	0.4347826	0.84610087	1.0	1847	tags=24%, list=25%, signal=32%
REACTOME_CELL_DEATH_SIGNALLING_VIA_NRAGE_NRIF_AND_NADE	REACTOME_CELL_DEATH_SIGNALLING_VIA_NRAGE_NRIF_AND_NADE		33	0.35937124	1.0272946	0.42839506	0.8477464	1.0	2753	tags=48%, list=37%, signal=77%
SUBTIL_PROGESTIN_TARGETS	SUBTIL_PROGESTIN_TARGETS		25	0.38133112	1.0267178	0.44716495	0.84883314	1.0	2109	tags=40%, list=28%, signal=56%
NIKOLSKY_BREAST_CANCER_11Q12_Q14_AMPLICON	NIKOLSKY_BREAST_CANCER_11Q12_Q14_AMPLICON		56	0.32701838	1.0266365	0.4435294	0.8484453	1.0	1932	tags=32%, list=26%, signal=43%
BOYLAN_MULTIPLE_MYELOMA_D_CLUSTER_DN	BOYLAN_MULTIPLE_MYELOMA_D_CLUSTER_DN		22	0.38386446	1.0265248	0.4375	0.84813076	1.0	1525	tags=27%, list=21%, signal=34%
MIPS_EMERIN_COMPLEX_25	MIPS_EMERIN_COMPLEX_25		13	0.44063622	1.0264333	0.46197993	0.8477632	1.0	691	tags=23%, list=9%, signal=25%
BROWNE_HCMV_INFECTION_20HR_DN	BROWNE_HCMV_INFECTION_20HR_DN		76	0.31738198	1.0260618	0.45044053	0.8482754	1.0	576	tags=14%, list=8%, signal=16%
GARY_CD5_TARGETS_UP	GARY_CD5_TARGETS_UP		285	0.28435224	1.0255392	0.42211056	0.8492564	1.0	1825	tags=25%, list=25%, signal=32%
REACTOME_G_ALPHA_S_SIGNALLING_EVENTS	REACTOME_G_ALPHA_S_SIGNALLING_EVENTS		42	0.3421617	1.0251759	0.4356796	0.84973794	1.0	858	tags=19%, list=12%, signal=21%
ABBUD_LIF_SIGNALING_1_DN	ABBUD_LIF_SIGNALING_1_DN		15	0.42304587	1.0250738	0.44262296	0.84943324	1.0	1049	tags=20%, list=14%, signal=23%
KEGG_CHEMOKINE_SIGNALING_PATHWAY	KEGG_CHEMOKINE_SIGNALING_PATHWAY		90	0.31144702	1.0247113	0.44581005	0.8498964	1.0	1542	tags=22%, list=21%, signal=28%
REACTOME_SIGNALING_BY_ILS	REACTOME_SIGNALING_BY_ILS		55	0.32796273	1.0246351	0.44248825	0.84947103	1.0	2006	tags=36%, list=27%, signal=49%
REACTOME_GLYCOSAMINOGLYCAN_METABOLISM	REACTOME_GLYCOSAMINOGLYCAN_METABOLISM		52	0.33769476	1.0236924	0.44988346	0.8516522	1.0	925	tags=19%, list=12%, signal=22%
HINATA_NFKB_TARGETS_FIBROBLAST_UP	HINATA_NFKB_TARGETS_FIBROBLAST_UP		54	0.3247721	1.023692	0.44235295	0.8510197	1.0	2040	tags=30%, list=27%, signal=41%
HOFFMANN_IMMATURE_TO_MATURE_B_LYMPHOCYTE_UP	HOFFMANN_IMMATURE_TO_MATURE_B_LYMPHOCYTE_UP		26	0.37532333	1.023235	0.4432099	0.8518214	1.0	837	tags=15%, list=11%, signal=17%
SCHAEFFER_PROSTATE_DEVELOPMENT_AND_CANCER_BOX1_UP	SCHAEFFER_PROSTATE_DEVELOPMENT_AND_CANCER_BOX1_UP		11	0.45408252	1.023224	0.453505	0.85121584	1.0	1668	tags=36%, list=22%, signal=47%
WU_HBX_TARGETS_3_UP	WU_HBX_TARGETS_3_UP		14	0.43327016	1.0228833	0.46254927	0.85165644	1.0	674	tags=21%, list=9%, signal=24%
HOEBEKE_LYMPHOID_STEM_CELL_DN	HOEBEKE_LYMPHOID_STEM_CELL_DN		73	0.31492776	1.02285	0.43671608	0.85112023	1.0	1088	tags=18%, list=15%, signal=21%
STAMBOLSKY_TARGETS_OF_MUTATED_TP53_DN	STAMBOLSKY_TARGETS_OF_MUTATED_TP53_DN		26	0.3679225	1.0225333	0.4385965	0.8514696	1.0	3074	tags=54%, list=41%, signal=91%
BUCKANOVICH_T_LYMPHOCYTE_HOMING_ON_TUMOR_UP	BUCKANOVICH_T_LYMPHOCYTE_HOMING_ON_TUMOR_UP		15	0.4169281	1.0214759	0.4515707	0.85402536	1.0	2716	tags=60%, list=37%, signal=94%
PROVENZANI_METASTASIS_UP	PROVENZANI_METASTASIS_UP		156	0.29372755	1.020612	0.44142258	0.85601044	1.0	1313	tags=19%, list=18%, signal=22%
KASLER_HDAC7_TARGETS_1_UP	KASLER_HDAC7_TARGETS_1_UP		110	0.3023726	1.0204914	0.4613734	0.8557309	1.0	1171	tags=15%, list=16%, signal=18%
SMID_BREAST_CANCER_LUMINAL_B_UP	SMID_BREAST_CANCER_LUMINAL_B_UP		88	0.30854672	1.0195646	0.43956044	0.85796124	1.0	1333	tags=27%, list=18%, signal=33%
YIH_RESPONSE_TO_ARSENITE_C2	YIH_RESPONSE_TO_ARSENITE_C2		14	0.42542785	1.0184588	0.44878706	0.860681	1.0	3068	tags=57%, list=41%, signal=97%
KORKOLA_YOLK_SAC_TUMOR_UP	KORKOLA_YOLK_SAC_TUMOR_UP		14	0.42684734	1.0184135	0.45201668	0.86017424	1.0	2582	tags=57%, list=35%, signal=87%
MIPS_DA_COMPLEX	MIPS_DA_COMPLEX		11	0.4409608	1.0183513	0.4650838	0.8597323	1.0	2425	tags=64%, list=33%, signal=94%
RIZKI_TUMOR_INVASIVENESS_2D_DN	RIZKI_TUMOR_INVASIVENESS_2D_DN		38	0.34480608	1.016829	0.44230768	0.86368626	1.0	1080	tags=24%, list=15%, signal=28%
GARGALOVIC_RESPONSE_TO_OXIDIZED_PHOSPHOLIPIDS_YELLOW_DN	GARGALOVIC_RESPONSE_TO_OXIDIZED_PHOSPHOLIPIDS_YELLOW_DN		13	0.43391258	1.0166183	0.4600812	0.8637001	1.0	1384	tags=31%, list=19%, signal=38%
SMID_BREAST_CANCER_RELAPSE_IN_BRAIN_DN	SMID_BREAST_CANCER_RELAPSE_IN_BRAIN_DN		45	0.33805236	1.0165823	0.44051826	0.86318994	1.0	818	tags=18%, list=11%, signal=20%
KEGG_APOPTOSIS	KEGG_APOPTOSIS		44	0.33421832	1.0161948	0.44761905	0.863722	1.0	1954	tags=34%, list=26%, signal=46%
BIOCARTA_CDMAC_PATHWAY	BIOCARTA_CDMAC_PATHWAY		13	0.4312995	1.0157015	0.44972825	0.86456776	1.0	1319	tags=31%, list=18%, signal=37%
LIEN_BREAST_CARCINOMA_METAPLASTIC_VS_DUCTAL_DN	LIEN_BREAST_CARCINOMA_METAPLASTIC_VS_DUCTAL_DN		31	0.35882565	1.0150737	0.45633456	0.8658541	1.0	2357	tags=45%, list=32%, signal=66%
GAUSSMANN_MLL_AF4_FUSION_TARGETS_D_UP	GAUSSMANN_MLL_AF4_FUSION_TARGETS_D_UP		20	0.39199334	1.0146048	0.45737484	0.86662567	1.0	1288	tags=30%, list=17%, signal=36%
HELLER_HDAC_TARGETS_SILENCED_BY_METHYLATION_UP	HELLER_HDAC_TARGETS_SILENCED_BY_METHYLATION_UP		297	0.27994892	1.0140277	0.46471775	0.86771554	1.0	890	tags=14%, list=12%, signal=16%
PID_REG_GR_PATHWAY	PID_REG_GR_PATHWAY		50	0.3311913	1.0139959	0.4458673	0.8671719	1.0	1651	tags=26%, list=22%, signal=33%
ZHAN_MULTIPLE_MYELOMA_CD1_DN	ZHAN_MULTIPLE_MYELOMA_CD1_DN		17	0.40522593	1.013955	0.45657894	0.86665136	1.0	690	tags=18%, list=9%, signal=19%
WATANABE_ULCERATIVE_COLITIS_WITH_CANCER_UP	WATANABE_ULCERATIVE_COLITIS_WITH_CANCER_UP		10	0.4533174	1.0137761	0.45973647	0.8665604	1.0	2170	tags=60%, list=29%, signal=85%
REACTOME_SYNTHESIS_AND_INTERCONVERSION_OF_NUCLEOTIDE_DI_AND_TRIPHOSPHATES	REACTOME_SYNTHESIS_AND_INTERCONVERSION_OF_NUCLEOTIDE_DI_AND_TRIPHOSPHATES		12	0.43498498	1.0134125	0.47619048	0.8669834	1.0	831	tags=25%, list=11%, signal=28%
HAN_SATB1_TARGETS_DN	HAN_SATB1_TARGETS_DN		274	0.27793267	1.0131308	0.4609929	0.86720324	1.0	1473	tags=23%, list=20%, signal=28%
MARSON_FOXP3_TARGETS_UP	MARSON_FOXP3_TARGETS_UP		49	0.33163723	1.0130746	0.4608295	0.86673874	1.0	1163	tags=20%, list=16%, signal=24%
KEGG_NOTCH_SIGNALING_PATHWAY	KEGG_NOTCH_SIGNALING_PATHWAY		29	0.36353695	1.0124574	0.44974875	0.8679345	1.0	1609	tags=31%, list=22%, signal=39%
ROSS_LEUKEMIA_WITH_MLL_FUSIONS	ROSS_LEUKEMIA_WITH_MLL_FUSIONS		57	0.3294402	1.0112348	0.47525892	0.8709477	1.0	1827	tags=26%, list=25%, signal=35%
WNT_SIGNALING	WNT_SIGNALING		46	0.33631858	1.0107815	0.46163216	0.8716766	1.0	1737	tags=28%, list=23%, signal=37%
QI_PLASMACYTOMA_DN	QI_PLASMACYTOMA_DN		64	0.31836984	1.0106417	0.4597433	0.87145066	1.0	940	tags=23%, list=13%, signal=27%
BIOCARTA_NFAT_PATHWAY	BIOCARTA_NFAT_PATHWAY		26	0.37109584	1.009813	0.47058824	0.8732742	1.0	861	tags=19%, list=12%, signal=22%
WOO_LIVER_CANCER_RECURRENCE_UP	WOO_LIVER_CANCER_RECURRENCE_UP		85	0.30555034	1.0094886	0.46440306	0.87361825	1.0	861	tags=19%, list=12%, signal=21%
LEE_LIVER_CANCER_MYC_DN	LEE_LIVER_CANCER_MYC_DN		37	0.34966025	1.0089417	0.45721272	0.8745564	1.0	463	tags=14%, list=6%, signal=14%
BHAT_ESR1_TARGETS_NOT_VIA_AKT1_UP	BHAT_ESR1_TARGETS_NOT_VIA_AKT1_UP		99	0.30009705	1.0085455	0.47650275	0.8751254	1.0	1322	tags=23%, list=18%, signal=28%
WHITE_NEUROBLASTOMA_WITH_1P36.3_DELETION	WHITE_NEUROBLASTOMA_WITH_1P36.3_DELETION		13	0.422913	1.0079042	0.4813793	0.87640274	1.0	2091	tags=38%, list=28%, signal=53%
ACEVEDO_FGFR1_TARGETS_IN_PROSTATE_CANCER_MODEL_UP	ACEVEDO_FGFR1_TARGETS_IN_PROSTATE_CANCER_MODEL_UP		127	0.2952167	1.0071841	0.459375	0.8778779	1.0	817	tags=13%, list=11%, signal=15%
ZHU_CMV_24_HR_UP	ZHU_CMV_24_HR_UP		66	0.31743383	1.0068163	0.4727891	0.8783448	1.0	2059	tags=27%, list=28%, signal=37%
DASU_IL6_SIGNALING_SCAR_DN	DASU_IL6_SIGNALING_SCAR_DN		12	0.4351197	1.006667	0.47116736	0.87814516	1.0	1396	tags=50%, list=19%, signal=61%
LU_EZH2_TARGETS_DN	LU_EZH2_TARGETS_DN		205	0.2853838	1.0064605	0.4814433	0.8781267	1.0	1830	tags=30%, list=25%, signal=38%
NAGASHIMA_NRG1_SIGNALING_DN	NAGASHIMA_NRG1_SIGNALING_DN		29	0.35700506	1.0061129	0.4648241	0.8785937	1.0	2368	tags=55%, list=32%, signal=81%
ZWANG_EGF_PERSISTENTLY_DN	ZWANG_EGF_PERSISTENTLY_DN		22	0.38117823	1.005427	0.4622279	0.8799557	1.0	2820	tags=45%, list=38%, signal=73%
REACTOME_SCF_BETA_TRCP_MEDIATED_DEGRADATION_OF_EMI1	REACTOME_SCF_BETA_TRCP_MEDIATED_DEGRADATION_OF_EMI1		45	0.33384725	1.005358	0.47635934	0.8795554	1.0	372	tags=7%, list=5%, signal=7%
ZHAN_MULTIPLE_MYELOMA_HP_DN	ZHAN_MULTIPLE_MYELOMA_HP_DN		25	0.37234187	1.0048409	0.4763158	0.8804634	1.0	1749	tags=32%, list=24%, signal=42%
REACTOME_A_TETRASACCHARIDE_LINKER_SEQUENCE_IS_REQUIRED_FOR_GAG_SYNTHESIS	REACTOME_A_TETRASACCHARIDE_LINKER_SEQUENCE_IS_REQUIRED_FOR_GAG_SYNTHESIS		15	0.41638774	1.0048006	0.47952443	0.8799598	1.0	925	tags=33%, list=12%, signal=38%
SENESE_HDAC2_TARGETS_UP	SENESE_HDAC2_TARGETS_UP		64	0.3150203	1.0046424	0.4809417	0.8797803	1.0	2387	tags=41%, list=32%, signal=59%
SESTO_RESPONSE_TO_UV_C6	SESTO_RESPONSE_TO_UV_C6		34	0.35024443	1.0038809	0.46958637	0.8814638	1.0	829	tags=15%, list=11%, signal=16%
RASHI_RESPONSE_TO_IONIZING_RADIATION_1	RASHI_RESPONSE_TO_IONIZING_RADIATION_1		31	0.3435864	1.0037464	0.47268108	0.8812191	1.0	586	tags=19%, list=8%, signal=21%
WU_HBX_TARGETS_1_UP	WU_HBX_TARGETS_1_UP		12	0.43076116	1.0036101	0.47887325	0.8809979	1.0	289	tags=17%, list=4%, signal=17%
COLLIS_PRKDC_REGULATORS	COLLIS_PRKDC_REGULATORS		11	0.43540305	1.0027748	0.47672778	0.8828281	1.0	2225	tags=55%, list=30%, signal=78%
REACTOME_AXON_GUIDANCE	REACTOME_AXON_GUIDANCE		148	0.2915604	1.0026435	0.49263158	0.88261646	1.0	1542	tags=24%, list=21%, signal=29%
GINESTIER_BREAST_CANCER_20Q13_AMPLIFICATION_UP	GINESTIER_BREAST_CANCER_20Q13_AMPLIFICATION_UP		58	0.3255357	1.0024462	0.47184685	0.88257265	1.0	1981	tags=31%, list=27%, signal=42%
ZHENG_RESPONSE_TO_ARSENITE_UP	ZHENG_RESPONSE_TO_ARSENITE_UP		14	0.42432237	1.0020369	0.49525103	0.88312805	1.0	45	tags=7%, list=1%, signal=7%
LINDGREN_BLADDER_CANCER_HIGH_RECURRENCE	LINDGREN_BLADDER_CANCER_HIGH_RECURRENCE		33	0.349765	1.0011785	0.46782178	0.8850716	1.0	2487	tags=45%, list=33%, signal=68%
RAO_BOUND_BY_SALL4_ISOFORM_B	RAO_BOUND_BY_SALL4_ISOFORM_B		228	0.27972776	1.001024	0.5107034	0.88490796	1.0	1626	tags=23%, list=22%, signal=29%
PID_P38ALPHABETADOWNSTREAMPATHWAY	PID_P38ALPHABETADOWNSTREAMPATHWAY		25	0.36338776	1.0001966	0.46307886	0.8867705	1.0	1092	tags=24%, list=15%, signal=28%
BIOCARTA_EIF_PATHWAY	BIOCARTA_EIF_PATHWAY		14	0.41905677	1.0001183	0.48347107	0.8863735	1.0	3743	tags=71%, list=50%, signal=144%
GILDEA_METASTASIS	GILDEA_METASTASIS		23	0.3779717	1.0000795	0.49006623	0.885857	1.0	2956	tags=65%, list=40%, signal=108%
KYNG_DNA_DAMAGE_BY_GAMMA_AND_UV_RADIATION	KYNG_DNA_DAMAGE_BY_GAMMA_AND_UV_RADIATION		52	0.32023787	0.99984246	0.48488373	0.8859181	1.0	2613	tags=42%, list=35%, signal=65%
VANASSE_BCL2_TARGETS_DN	VANASSE_BCL2_TARGETS_DN		37	0.3499074	0.99979675	0.47115386	0.8854281	1.0	614	tags=19%, list=8%, signal=21%
ZHENG_FOXP3_TARGETS_IN_THYMUS_UP	ZHENG_FOXP3_TARGETS_IN_THYMUS_UP		102	0.29910535	0.99955285	0.49733192	0.88551724	1.0	1798	tags=29%, list=24%, signal=38%
REACTOME_SIGNALING_BY_FGFR_MUTANTS	REACTOME_SIGNALING_BY_FGFR_MUTANTS		19	0.38690928	0.99941164	0.45225465	0.8852843	1.0	2208	tags=42%, list=30%, signal=60%
RICKMAN_HEAD_AND_NECK_CANCER_F	RICKMAN_HEAD_AND_NECK_CANCER_F		18	0.39946303	0.99858814	0.48050314	0.8870899	1.0	2363	tags=56%, list=32%, signal=81%
BROWNE_HCMV_INFECTION_24HR_UP	BROWNE_HCMV_INFECTION_24HR_UP		100	0.30023807	0.997981	0.511254	0.888293	1.0	1980	tags=32%, list=27%, signal=43%
ONGUSAHA_BRCA1_TARGETS_UP	ONGUSAHA_BRCA1_TARGETS_UP		11	0.43287656	0.9971821	0.48314607	0.88997746	1.0	31	tags=9%, list=0%, signal=9%
RADAEVA_RESPONSE_TO_IFNA1_UP	RADAEVA_RESPONSE_TO_IFNA1_UP		32	0.35370824	0.99715483	0.48542458	0.88943386	1.0	710	tags=16%, list=10%, signal=17%
EHRLICH_ICF_SYNDROM_UP	EHRLICH_ICF_SYNDROM_UP		11	0.43514055	0.9965473	0.5	0.8905696	1.0	808	tags=36%, list=11%, signal=41%
BANDRES_RESPONSE_TO_CARMUSTIN_MGMT_48HR_DN	BANDRES_RESPONSE_TO_CARMUSTIN_MGMT_48HR_DN		82	0.30480948	0.9963974	0.4709111	0.89039874	1.0	1758	tags=28%, list=24%, signal=36%
WOOD_EBV_EBNA1_TARGETS_UP	WOOD_EBV_EBNA1_TARGETS_UP		86	0.30176252	0.9963432	0.4857456	0.8899166	1.0	1489	tags=26%, list=20%, signal=32%
TSAI_RESPONSE_TO_IONIZING_RADIATION	TSAI_RESPONSE_TO_IONIZING_RADIATION		101	0.296217	0.99625957	0.50272626	0.8895389	1.0	1938	tags=32%, list=26%, signal=42%
RUAN_RESPONSE_TO_TROGLITAZONE_UP	RUAN_RESPONSE_TO_TROGLITAZONE_UP		16	0.4074609	0.996191	0.48953974	0.8891173	1.0	2227	tags=31%, list=30%, signal=45%
APPIERTO_RESPONSE_TO_FENRETINIDE_DN	APPIERTO_RESPONSE_TO_FENRETINIDE_DN		34	0.35043618	0.9961581	0.48039216	0.88857704	1.0	3454	tags=56%, list=46%, signal=104%
PID_PDGFRAPATHWAY	PID_PDGFRAPATHWAY		16	0.40796116	0.99553597	0.48609272	0.88982856	1.0	1095	tags=31%, list=15%, signal=37%
CEBALLOS_TARGETS_OF_TP53_AND_MYC_UP	CEBALLOS_TARGETS_OF_TP53_AND_MYC_UP		18	0.39079085	0.9950903	0.47012988	0.8905042	1.0	646	tags=17%, list=9%, signal=18%
KRASNOSELSKAYA_ILF3_TARGETS_UP	KRASNOSELSKAYA_ILF3_TARGETS_UP		27	0.35934433	0.9938169	0.486692	0.8936148	1.0	67	tags=7%, list=1%, signal=7%
TERAO_AOX4_TARGETS_SKIN_UP	TERAO_AOX4_TARGETS_SKIN_UP		21	0.37854242	0.9935423	0.47765008	0.893801	1.0	1719	tags=33%, list=23%, signal=43%
KEGG_ERBB_SIGNALING_PATHWAY	KEGG_ERBB_SIGNALING_PATHWAY		52	0.3246924	0.9931325	0.4915254	0.8943976	1.0	2122	tags=35%, list=29%, signal=48%
PID_FASPATHWAY	PID_FASPATHWAY		23	0.3674004	0.99296886	0.4848101	0.8942433	1.0	654	tags=17%, list=9%, signal=19%
RODWELL_AGING_KIDNEY_NO_BLOOD_UP	RODWELL_AGING_KIDNEY_NO_BLOOD_UP		122	0.29092976	0.9929559	0.5021322	0.89365876	1.0	645	tags=15%, list=9%, signal=16%
TORCHIA_TARGETS_OF_EWSR1_FLI1_FUSION_DN	TORCHIA_TARGETS_OF_EWSR1_FLI1_FUSION_DN		168	0.2858492	0.9923165	0.53271025	0.8949299	1.0	1648	tags=25%, list=22%, signal=31%
NAKAYAMA_SOFT_TISSUE_TUMORS_PCA1_DN	NAKAYAMA_SOFT_TISSUE_TUMORS_PCA1_DN		50	0.32857665	0.9921636	0.50638795	0.8947563	1.0	1447	tags=30%, list=19%, signal=37%
FRASOR_RESPONSE_TO_ESTRADIOL_UP	FRASOR_RESPONSE_TO_ESTRADIOL_UP		25	0.3652673	0.9916533	0.48966408	0.89561623	1.0	793	tags=16%, list=11%, signal=18%
BROWNE_HCMV_INFECTION_16HR_DN	BROWNE_HCMV_INFECTION_16HR_DN		59	0.31535685	0.9914537	0.50230414	0.89558274	1.0	1268	tags=19%, list=17%, signal=22%
REACTOME_SIGNALING_BY_ERBB4	REACTOME_SIGNALING_BY_ERBB4		46	0.32751065	0.9909172	0.504142	0.89646477	1.0	2346	tags=39%, list=32%, signal=57%
BACOLOD_RESISTANCE_TO_ALKYLATING_AGENTS_UP	BACOLOD_RESISTANCE_TO_ALKYLATING_AGENTS_UP		22	0.37138262	0.9907456	0.48423707	0.89632744	1.0	1714	tags=41%, list=23%, signal=53%
NUYTTEN_NIPP1_TARGETS_UP	NUYTTEN_NIPP1_TARGETS_UP		357	0.27176332	0.9905084	0.52663314	0.8963713	1.0	2059	tags=30%, list=28%, signal=40%
GYORFFY_DOXORUBICIN_RESISTANCE	GYORFFY_DOXORUBICIN_RESISTANCE		22	0.37597105	0.99040544	0.5045278	0.89602476	1.0	629	tags=18%, list=8%, signal=20%
REACTOME_PRE_NOTCH_PROCESSING_IN_GOLGI	REACTOME_PRE_NOTCH_PROCESSING_IN_GOLGI		11	0.43505684	0.9890807	0.4918033	0.89915013	1.0	2465	tags=36%, list=33%, signal=54%
GUO_HEX_TARGETS_UP	GUO_HEX_TARGETS_UP		57	0.3157262	0.98889333	0.4935972	0.8990933	1.0	2087	tags=37%, list=28%, signal=51%
REACTOME_DOWNSTREAM_TCR_SIGNALING	REACTOME_DOWNSTREAM_TCR_SIGNALING		18	0.39051622	0.9886329	0.48480844	0.89924526	1.0	1117	tags=28%, list=15%, signal=33%
CASTELLANO_NRAS_TARGETS_UP	CASTELLANO_NRAS_TARGETS_UP		41	0.33106816	0.98829865	0.5090909	0.8995512	1.0	2312	tags=37%, list=31%, signal=53%
SIG_CHEMOTAXIS	SIG_CHEMOTAXIS		28	0.35479	0.9880493	0.50250626	0.89962554	1.0	2280	tags=32%, list=31%, signal=46%
CASORELLI_ACUTE_PROMYELOCYTIC_LEUKEMIA_UP	CASORELLI_ACUTE_PROMYELOCYTIC_LEUKEMIA_UP		114	0.28931007	0.98662525	0.5132837	0.90315276	1.0	1749	tags=27%, list=24%, signal=35%
BIOCARTA_ETS_PATHWAY	BIOCARTA_ETS_PATHWAY		11	0.42943823	0.9865667	0.49509117	0.9026965	1.0	1733	tags=36%, list=23%, signal=47%
KEGG_ADHERENS_JUNCTION	KEGG_ADHERENS_JUNCTION		51	0.32770237	0.98652405	0.50857145	0.90219027	1.0	2277	tags=47%, list=31%, signal=67%
ST_P38_MAPK_PATHWAY	ST_P38_MAPK_PATHWAY		24	0.36898383	0.98584974	0.50377834	0.9035273	1.0	1421	tags=29%, list=19%, signal=36%
PAPASPYRIDONOS_UNSTABLE_ATEROSCLEROTIC_PLAQUE_DN	PAPASPYRIDONOS_UNSTABLE_ATEROSCLEROTIC_PLAQUE_DN		31	0.3503586	0.98558503	0.48802018	0.9036978	1.0	1202	tags=26%, list=16%, signal=31%
AIYAR_COBRA1_TARGETS_DN	AIYAR_COBRA1_TARGETS_DN		21	0.37739584	0.98531294	0.48966408	0.9038564	1.0	1706	tags=33%, list=23%, signal=43%
GRATIAS_RETINOBLASTOMA_16Q24	GRATIAS_RETINOBLASTOMA_16Q24		17	0.3948291	0.984986	0.49862638	0.90417385	1.0	2244	tags=29%, list=30%, signal=42%
LEE_NEURAL_CREST_STEM_CELL_UP	LEE_NEURAL_CREST_STEM_CELL_UP		104	0.29251772	0.9844066	0.53829557	0.90517515	1.0	1136	tags=20%, list=15%, signal=23%
MIPS_RNA_POLYMERASE_II_CORE_COMPLEX	MIPS_RNA_POLYMERASE_II_CORE_COMPLEX		11	0.43274617	0.9842713	0.50927246	0.904954	1.0	3712	tags=82%, list=50%, signal=163%
MEISSNER_BRAIN_HCP_WITH_H3K27ME3	MEISSNER_BRAIN_HCP_WITH_H3K27ME3		47	0.32274932	0.98420614	0.4851013	0.90451413	1.0	1318	tags=28%, list=18%, signal=33%
RAMPON_ENRICHED_LEARNING_ENVIRONMENT_EARLY_UP	RAMPON_ENRICHED_LEARNING_ENVIRONMENT_EARLY_UP		12	0.42625496	0.9841722	0.49222064	0.9039917	1.0	3070	tags=58%, list=41%, signal=99%
KEGG_COMPLEMENT_AND_COAGULATION_CASCADES	KEGG_COMPLEMENT_AND_COAGULATION_CASCADES		49	0.320483	0.9838747	0.5245714	0.9042448	1.0	587	tags=12%, list=8%, signal=13%
CARD_MIR302A_TARGETS	CARD_MIR302A_TARGETS		45	0.32834595	0.9828618	0.51300234	0.9065067	1.0	2494	tags=47%, list=34%, signal=70%
BOYAULT_LIVER_CANCER_SUBCLASS_G123_DN	BOYAULT_LIVER_CANCER_SUBCLASS_G123_DN		34	0.34355575	0.98273957	0.5	0.9062152	1.0	2191	tags=41%, list=29%, signal=58%
MIKKELSEN_NPC_HCP_WITH_H3K27ME3	MIKKELSEN_NPC_HCP_WITH_H3K27ME3		68	0.30586147	0.98256564	0.49607182	0.9060702	1.0	633	tags=18%, list=9%, signal=19%
LIM_MAMMARY_LUMINAL_MATURE_DN	LIM_MAMMARY_LUMINAL_MATURE_DN		56	0.31810877	0.9823321	0.5155351	0.9060974	1.0	1707	tags=34%, list=23%, signal=44%
MIPS_TRAP_COMPLEX	MIPS_TRAP_COMPLEX		10	0.43761998	0.9817734	0.51445085	0.90707296	1.0	2469	tags=50%, list=33%, signal=75%
MCBRYAN_PUBERTAL_TGFB1_TARGETS_DN	MCBRYAN_PUBERTAL_TGFB1_TARGETS_DN		35	0.3451497	0.98152924	0.5078979	0.90716	1.0	2558	tags=57%, list=34%, signal=87%
HOFMANN_CELL_LYMPHOMA_DN	HOFMANN_CELL_LYMPHOMA_DN		21	0.37119454	0.98137313	0.5089514	0.9069979	1.0	367	tags=10%, list=5%, signal=10%
SA_PTEN_PATHWAY	SA_PTEN_PATHWAY		11	0.4377494	0.9811527	0.50141644	0.9069903	1.0	1954	tags=45%, list=26%, signal=62%
HEIDENBLAD_AMPLICON_12P11_12_UP	HEIDENBLAD_AMPLICON_12P11_12_UP		18	0.38467646	0.9807754	0.4919571	0.9074764	1.0	1259	tags=28%, list=17%, signal=33%
SASAI_RESISTANCE_TO_NEOPLASTIC_TRANSFROMATION	SASAI_RESISTANCE_TO_NEOPLASTIC_TRANSFROMATION		40	0.33133644	0.9807707	0.5059666	0.90686667	1.0	928	tags=23%, list=12%, signal=26%
REACTOME_PKB_MEDIATED_EVENTS	REACTOME_PKB_MEDIATED_EVENTS		14	0.4098865	0.9803982	0.5	0.9073151	1.0	3179	tags=57%, list=43%, signal=100%
PETRETTO_HEART_MASS_QTL_CIS_UP	PETRETTO_HEART_MASS_QTL_CIS_UP		13	0.42087597	0.9796946	0.50482756	0.9087298	1.0	2610	tags=54%, list=35%, signal=83%
WIERENGA_STAT5A_TARGETS_GROUP1	WIERENGA_STAT5A_TARGETS_GROUP1		59	0.31415936	0.9796467	0.5046729	0.90825635	1.0	1424	tags=22%, list=19%, signal=27%
TOOKER_GEMCITABINE_RESISTANCE_DN	TOOKER_GEMCITABINE_RESISTANCE_DN		103	0.29228717	0.9794191	0.5370763	0.90828484	1.0	1981	tags=31%, list=27%, signal=42%
HAMAI_APOPTOSIS_VIA_TRAIL_DN	HAMAI_APOPTOSIS_VIA_TRAIL_DN		100	0.29058427	0.97902834	0.5116279	0.9087977	1.0	1017	tags=19%, list=14%, signal=22%
BOYAULT_LIVER_CANCER_SUBCLASS_G6_DN	BOYAULT_LIVER_CANCER_SUBCLASS_G6_DN		14	0.4113418	0.97898227	0.5198864	0.90829337	1.0	670	tags=14%, list=9%, signal=16%
REACTOME_BMAL1_CLOCK_NPAS2_ACTIVATES_CIRCADIAN_EXPRESSION	REACTOME_BMAL1_CLOCK_NPAS2_ACTIVATES_CIRCADIAN_EXPRESSION		19	0.37962243	0.9789147	0.5	0.9078475	1.0	1788	tags=37%, list=24%, signal=48%
REACTOME_GPCR_DOWNSTREAM_SIGNALING	REACTOME_GPCR_DOWNSTREAM_SIGNALING		164	0.28362983	0.97869664	0.5483871	0.9078283	1.0	1542	tags=24%, list=21%, signal=30%
KOYAMA_SEMA3B_TARGETS_UP	KOYAMA_SEMA3B_TARGETS_UP		131	0.28692436	0.97858787	0.5514706	0.90749586	1.0	1489	tags=25%, list=20%, signal=31%
SHIPP_DLBCL_CURED_VS_FATAL_DN	SHIPP_DLBCL_CURED_VS_FATAL_DN		30	0.34575093	0.9783637	0.4950495	0.9075144	1.0	1934	tags=30%, list=26%, signal=40%
TCGA_GLIOBLASTOMA_COPY_NUMBER_UP	TCGA_GLIOBLASTOMA_COPY_NUMBER_UP		31	0.3483944	0.9782886	0.5170316	0.9071182	1.0	2624	tags=45%, list=35%, signal=69%
FIGUEROA_AML_METHYLATION_CLUSTER_1_DN	FIGUEROA_AML_METHYLATION_CLUSTER_1_DN		17	0.38058382	0.9781974	0.49479166	0.9067403	1.0	2343	tags=35%, list=32%, signal=51%
DEMAGALHAES_AGING_DN	DEMAGALHAES_AGING_DN		11	0.42839378	0.97743803	0.5294944	0.90831923	1.0	3424	tags=64%, list=46%, signal=118%
KEGG_COLORECTAL_CANCER	KEGG_COLORECTAL_CANCER		39	0.33379993	0.97684324	0.50544137	0.9094029	1.0	2546	tags=41%, list=34%, signal=62%
VERHAAK_AML_WITH_NPM1_MUTATED_DN	VERHAAK_AML_WITH_NPM1_MUTATED_DN		159	0.2795	0.9759429	0.5512552	0.91135293	1.0	861	tags=17%, list=12%, signal=19%
FU_INTERACT_WITH_ALKBH8	FU_INTERACT_WITH_ALKBH8		11	0.4317818	0.97594047	0.5327381	0.9107415	1.0	3390	tags=64%, list=46%, signal=117%
ST_G_ALPHA_I_PATHWAY	ST_G_ALPHA_I_PATHWAY		20	0.37693146	0.97589606	0.53661615	0.9102392	1.0	1257	tags=30%, list=17%, signal=36%
REACTOME_ABC_FAMILY_PROTEINS_MEDIATED_TRANSPORT	REACTOME_ABC_FAMILY_PROTEINS_MEDIATED_TRANSPORT		13	0.41608936	0.9756531	0.50403225	0.9103222	1.0	1893	tags=46%, list=25%, signal=62%
YAGI_AML_WITH_T_8_21_TRANSLOCATION	YAGI_AML_WITH_T_8_21_TRANSLOCATION		256	0.27367288	0.97550297	0.57258886	0.9101487	1.0	665	tags=12%, list=9%, signal=13%
WHITESIDE_CISPLATIN_RESISTANCE_DN	WHITESIDE_CISPLATIN_RESISTANCE_DN		11	0.43312797	0.97521085	0.5283541	0.9103566	1.0	3205	tags=73%, list=43%, signal=128%
STAMBOLSKY_RESPONSE_TO_VITAMIN_D3_DN	STAMBOLSKY_RESPONSE_TO_VITAMIN_D3_DN		10	0.43269342	0.97506857	0.51537335	0.91013616	1.0	2534	tags=60%, list=34%, signal=91%
MIYAGAWA_TARGETS_OF_EWSR1_ETS_FUSIONS_UP	MIYAGAWA_TARGETS_OF_EWSR1_ETS_FUSIONS_UP		112	0.28898188	0.9750161	0.53091687	0.90967125	1.0	1314	tags=22%, list=18%, signal=27%
MEDINA_SMARCA4_TARGETS	MEDINA_SMARCA4_TARGETS		27	0.35266095	0.9748155	0.51511335	0.90960073	1.0	832	tags=19%, list=11%, signal=21%
REACTOME_SHC_MEDIATED_CASCADE	REACTOME_SHC_MEDIATED_CASCADE		10	0.4399813	0.9746958	0.5283541	0.9093246	1.0	542	tags=20%, list=7%, signal=22%
BIOCARTA_PAR1_PATHWAY	BIOCARTA_PAR1_PATHWAY		25	0.357076	0.97385484	0.5239948	0.91103727	1.0	1542	tags=32%, list=21%, signal=40%
THEILGAARD_NEUTROPHIL_AT_SKIN_WOUND_DN	THEILGAARD_NEUTROPHIL_AT_SKIN_WOUND_DN		173	0.2791799	0.97367	0.5412371	0.91089255	1.0	2035	tags=28%, list=27%, signal=37%
REACTOME_FATTY_ACID_TRIACYLGLYCEROL_AND_KETONE_BODY_METABOLISM	REACTOME_FATTY_ACID_TRIACYLGLYCEROL_AND_KETONE_BODY_METABOLISM		91	0.2935679	0.97351	0.52614015	0.91070247	1.0	1869	tags=27%, list=25%, signal=36%
FORTSCHEGGER_PHF8_TARGETS_UP	FORTSCHEGGER_PHF8_TARGETS_UP		130	0.2827273	0.9729384	0.5417107	0.91173863	1.0	2473	tags=38%, list=33%, signal=57%
YAUCH_HEDGEHOG_SIGNALING_PARACRINE_UP	YAUCH_HEDGEHOG_SIGNALING_PARACRINE_UP		49	0.31262803	0.97250277	0.51193315	0.91239136	1.0	1563	tags=33%, list=21%, signal=41%
KAYO_AGING_MUSCLE_UP	KAYO_AGING_MUSCLE_UP		142	0.27981558	0.9724149	0.539501	0.91200703	1.0	1528	tags=25%, list=21%, signal=31%
SMID_BREAST_CANCER_ERBB2_UP	SMID_BREAST_CANCER_ERBB2_UP		78	0.29459554	0.9715525	0.52691865	0.9138072	1.0	620	tags=12%, list=8%, signal=12%
GAUSSMANN_MLL_AF4_FUSION_TARGETS_G_DN	GAUSSMANN_MLL_AF4_FUSION_TARGETS_G_DN		18	0.38367712	0.97150123	0.5039474	0.9133406	1.0	800	tags=22%, list=11%, signal=25%
YAMASHITA_METHYLATED_IN_PROSTATE_CANCER	YAMASHITA_METHYLATED_IN_PROSTATE_CANCER		25	0.35854974	0.9713683	0.52791876	0.9130714	1.0	473	tags=20%, list=6%, signal=21%
DARWICHE_PAPILLOMA_RISK_HIGH_UP	DARWICHE_PAPILLOMA_RISK_HIGH_UP		77	0.29690462	0.9712157	0.53769404	0.9128835	1.0	802	tags=12%, list=11%, signal=13%
GARGALOVIC_RESPONSE_TO_OXIDIZED_PHOSPHOLIPIDS_BLUE_DN	GARGALOVIC_RESPONSE_TO_OXIDIZED_PHOSPHOLIPIDS_BLUE_DN		29	0.34991708	0.97079784	0.51641417	0.91350067	1.0	1264	tags=28%, list=17%, signal=33%
BRUINS_UVC_RESPONSE_VIA_TP53_GROUP_C	BRUINS_UVC_RESPONSE_VIA_TP53_GROUP_C		33	0.3345829	0.9701322	0.5227552	0.9147729	1.0	1973	tags=36%, list=27%, signal=49%
BOCHKIS_FOXA2_TARGETS	BOCHKIS_FOXA2_TARGETS		223	0.2720962	0.9700275	0.5752303	0.9144532	1.0	2301	tags=33%, list=31%, signal=46%
IGLESIAS_E2F_TARGETS_UP	IGLESIAS_E2F_TARGETS_UP		120	0.2827584	0.96980953	0.54276663	0.9144517	1.0	1534	tags=22%, list=21%, signal=27%
REACTOME_RNA_POL_II_TRANSCRIPTION_PRE_INITIATION_AND_PROMOTER_OPENING	REACTOME_RNA_POL_II_TRANSCRIPTION_PRE_INITIATION_AND_PROMOTER_OPENING		29	0.34381017	0.96945846	0.5281602	0.9148277	1.0	2892	tags=55%, list=39%, signal=90%
MOOTHA_MITOCHONDRIA	MOOTHA_MITOCHONDRIA		342	0.26713318	0.96934915	0.5949749	0.9145184	1.0	2429	tags=28%, list=33%, signal=40%
BROWN_MYELOID_CELL_DEVELOPMENT_DN	BROWN_MYELOID_CELL_DEVELOPMENT_DN		77	0.29898003	0.969107	0.5346756	0.91456336	1.0	1783	tags=30%, list=24%, signal=39%
SCHAEFFER_PROSTATE_DEVELOPMENT_AND_CANCER_BOX4_DN	SCHAEFFER_PROSTATE_DEVELOPMENT_AND_CANCER_BOX4_DN		22	0.36441755	0.96890795	0.51379764	0.9145229	1.0	2465	tags=50%, list=33%, signal=75%
TIEN_INTESTINE_PROBIOTICS_2HR_DN	TIEN_INTESTINE_PROBIOTICS_2HR_DN		72	0.30215088	0.9683814	0.546652	0.91537535	1.0	1913	tags=31%, list=26%, signal=41%
BYSTRYKH_HEMATOPOIESIS_STEM_CELL_AND_BRAIN_QTL_CIS	BYSTRYKH_HEMATOPOIESIS_STEM_CELL_AND_BRAIN_QTL_CIS		39	0.3286633	0.9680585	0.5319662	0.9156748	1.0	2238	tags=38%, list=30%, signal=55%
PID_P38_MK2PATHWAY	PID_P38_MK2PATHWAY		20	0.3752546	0.96770746	0.53580904	0.9160231	1.0	832	tags=15%, list=11%, signal=17%
LI_WILMS_TUMOR_VS_FETAL_KIDNEY_2_DN	LI_WILMS_TUMOR_VS_FETAL_KIDNEY_2_DN		36	0.33634254	0.9672739	0.5378049	0.9166174	1.0	2493	tags=47%, list=34%, signal=71%
PID_TELOMERASEPATHWAY	PID_TELOMERASEPATHWAY		46	0.31784025	0.9669025	0.5395514	0.9169988	1.0	2551	tags=39%, list=34%, signal=59%
REACTOME_PEPTIDE_LIGAND_BINDING_RECEPTORS	REACTOME_PEPTIDE_LIGAND_BINDING_RECEPTORS		46	0.3160166	0.9667464	0.51348186	0.91681546	1.0	1483	tags=28%, list=20%, signal=35%
WANG_RECURRENT_LIVER_CANCER_UP	WANG_RECURRENT_LIVER_CANCER_UP		14	0.40632653	0.966374	0.5257302	0.9172078	1.0	1182	tags=36%, list=16%, signal=42%
REACTOME_SYNTHESIS_OF_PIPS_AT_THE_PLASMA_MEMBRANE	REACTOME_SYNTHESIS_OF_PIPS_AT_THE_PLASMA_MEMBRANE		17	0.37910435	0.96632457	0.49930844	0.9167411	1.0	2240	tags=41%, list=30%, signal=59%
NIKOLSKY_BREAST_CANCER_8Q23_Q24_AMPLICON	NIKOLSKY_BREAST_CANCER_8Q23_Q24_AMPLICON		54	0.31176564	0.9662413	0.55542856	0.9163717	1.0	1137	tags=17%, list=15%, signal=20%
REACTOME_TCR_SIGNALING	REACTOME_TCR_SIGNALING		27	0.35197935	0.9660008	0.5267746	0.9163859	1.0	1492	tags=30%, list=20%, signal=37%
KYNG_DNA_DAMAGE_BY_4NQO	KYNG_DNA_DAMAGE_BY_4NQO		29	0.34090996	0.96552896	0.521197	0.9171443	1.0	674	tags=10%, list=9%, signal=11%
CUI_TCF21_TARGETS_DN	CUI_TCF21_TARGETS_DN		10	0.43640572	0.9652651	0.52849	0.91724896	1.0	2035	tags=40%, list=27%, signal=55%
BIOCARTA_SPRY_PATHWAY	BIOCARTA_SPRY_PATHWAY		14	0.39761	0.96478105	0.51771116	0.9179868	1.0	1921	tags=43%, list=26%, signal=58%
KEGG_N_GLYCAN_BIOSYNTHESIS	KEGG_N_GLYCAN_BIOSYNTHESIS		26	0.35744488	0.9644278	0.52692306	0.9183342	1.0	1375	tags=23%, list=18%, signal=28%
MARTINEZ_TP53_TARGETS_UP	MARTINEZ_TP53_TARGETS_UP		338	0.26473895	0.9639236	0.62512565	0.91914016	1.0	1886	tags=25%, list=25%, signal=33%
LIM_MAMMARY_STEM_CELL_UP	LIM_MAMMARY_STEM_CELL_UP		249	0.2675079	0.962984	0.58817536	0.9210667	1.0	1189	tags=20%, list=16%, signal=23%
BLUM_RESPONSE_TO_SALIRASIB_UP	BLUM_RESPONSE_TO_SALIRASIB_UP		194	0.2696809	0.9629056	0.56178606	0.9206718	1.0	1749	tags=27%, list=24%, signal=34%
KAAB_HEART_ATRIUM_VS_VENTRICLE_DN	KAAB_HEART_ATRIUM_VS_VENTRICLE_DN		192	0.27171513	0.962819	0.5740741	0.920303	1.0	1801	tags=24%, list=24%, signal=31%
KLEIN_TARGETS_OF_BCR_ABL1_FUSION	KLEIN_TARGETS_OF_BCR_ABL1_FUSION		19	0.373741	0.96273583	0.5407895	0.91993904	1.0	979	tags=26%, list=13%, signal=30%
TAKEDA_TARGETS_OF_NUP98_HOXA9_FUSION_8D_UP	TAKEDA_TARGETS_OF_NUP98_HOXA9_FUSION_8D_UP		72	0.2995854	0.96234775	0.5478065	0.9203995	1.0	2050	tags=35%, list=28%, signal=47%
REACTOME_SHC1_EVENTS_IN_EGFR_SIGNALING	REACTOME_SHC1_EVENTS_IN_EGFR_SIGNALING		12	0.41532955	0.9623414	0.52624494	0.91980845	1.0	2256	tags=42%, list=30%, signal=60%
LIU_TARGETS_OF_VMYB_VS_CMYB_DN	LIU_TARGETS_OF_VMYB_VS_CMYB_DN		18	0.38248944	0.9620964	0.538874	0.9198586	1.0	1811	tags=28%, list=24%, signal=37%
REACTOME_HEMOSTASIS	REACTOME_HEMOSTASIS		245	0.2673936	0.9619715	0.5831643	0.91958404	1.0	681	tags=10%, list=9%, signal=11%
BURTON_ADIPOGENESIS_11	BURTON_ADIPOGENESIS_11		40	0.3206046	0.9616914	0.53496933	0.91977036	1.0	2723	tags=45%, list=37%, signal=71%
MARTINEZ_RESPONSE_TO_TRABECTEDIN	MARTINEZ_RESPONSE_TO_TRABECTEDIN		36	0.3314639	0.9615495	0.5257985	0.9195651	1.0	1705	tags=31%, list=23%, signal=39%
CAIRO_HEPATOBLASTOMA_POOR_SURVIVAL	CAIRO_HEPATOBLASTOMA_POOR_SURVIVAL		10	0.4304529	0.9614898	0.5344828	0.91910994	1.0	10	tags=10%, list=0%, signal=10%
AMBROSINI_FLAVOPIRIDOL_TREATMENT_TP53	AMBROSINI_FLAVOPIRIDOL_TREATMENT_TP53		76	0.2944008	0.9610973	0.54199326	0.9195634	1.0	1378	tags=22%, list=19%, signal=27%
JUBAN_TARGETS_OF_SPI1_AND_FLI1_UP	JUBAN_TARGETS_OF_SPI1_AND_FLI1_UP		68	0.30193377	0.9609848	0.535513	0.91924816	1.0	2278	tags=34%, list=31%, signal=48%
CERIBELLI_PROMOTERS_INACTIVE_AND_BOUND_BY_NFY	CERIBELLI_PROMOTERS_INACTIVE_AND_BOUND_BY_NFY		12	0.41241243	0.9609535	0.5152778	0.9187267	1.0	896	tags=33%, list=12%, signal=38%
KOYAMA_SEMA3B_TARGETS_DN	KOYAMA_SEMA3B_TARGETS_DN		200	0.27260873	0.9608959	0.5954825	0.9182893	1.0	1577	tags=23%, list=21%, signal=28%
SILIGAN_TARGETS_OF_EWS_FLI1_FUSION_UP	SILIGAN_TARGETS_OF_EWS_FLI1_FUSION_UP		12	0.4186727	0.9607194	0.54320985	0.91818607	1.0	631	tags=17%, list=8%, signal=18%
PANGAS_TUMOR_SUPPRESSION_BY_SMAD1_AND_SMAD5_DN	PANGAS_TUMOR_SUPPRESSION_BY_SMAD1_AND_SMAD5_DN		72	0.30318344	0.9606513	0.5514541	0.91778064	1.0	1424	tags=25%, list=19%, signal=31%
GRUETZMANN_PANCREATIC_CANCER_UP	GRUETZMANN_PANCREATIC_CANCER_UP		288	0.26517582	0.9606416	0.6089159	0.9172084	1.0	2066	tags=27%, list=28%, signal=36%
HOLLEMAN_VINCRISTINE_RESISTANCE_ALL_DN	HOLLEMAN_VINCRISTINE_RESISTANCE_ALL_DN		19	0.37615496	0.96044946	0.5265201	0.9171543	1.0	2941	tags=47%, list=40%, signal=78%
MIPS_60S_RIBOSOMAL_SUBUNIT_CYTOPLASMIC	MIPS_60S_RIBOSOMAL_SUBUNIT_CYTOPLASMIC		43	0.325402	0.9603087	0.56182474	0.91691816	1.0	3935	tags=72%, list=53%, signal=152%
REACTOME_PIP3_ACTIVATES_AKT_SIGNALING	REACTOME_PIP3_ACTIVATES_AKT_SIGNALING		16	0.3903604	0.96008795	0.52837837	0.91691184	1.0	2285	tags=44%, list=31%, signal=63%
KEGG_TOLL_LIKE_RECEPTOR_SIGNALING_PATHWAY	KEGG_TOLL_LIKE_RECEPTOR_SIGNALING_PATHWAY		40	0.32196397	0.95992804	0.53836787	0.91672266	1.0	652	tags=18%, list=9%, signal=19%
SMID_BREAST_CANCER_RELAPSE_IN_BONE_UP	SMID_BREAST_CANCER_RELAPSE_IN_BONE_UP		44	0.319428	0.9594883	0.53908986	0.9173195	1.0	1492	tags=27%, list=20%, signal=34%
REACTOME_SIGNALING_BY_SCF_KIT	REACTOME_SIGNALING_BY_SCF_KIT		47	0.31185767	0.9591185	0.543943	0.9177568	1.0	2339	tags=38%, list=31%, signal=56%
DAZARD_UV_RESPONSE_CLUSTER_G4	DAZARD_UV_RESPONSE_CLUSTER_G4		14	0.40103474	0.95816016	0.534153	0.9196988	1.0	1520	tags=29%, list=20%, signal=36%
PID_TCPTP_PATHWAY	PID_TCPTP_PATHWAY		29	0.34828103	0.958157	0.54931337	0.91910654	1.0	2065	tags=38%, list=28%, signal=52%
ALCALA_APOPTOSIS	ALCALA_APOPTOSIS		63	0.30425802	0.95791936	0.5675057	0.919124	1.0	3029	tags=35%, list=41%, signal=58%
ONGUSAHA_TP53_TARGETS	ONGUSAHA_TP53_TARGETS		23	0.35987565	0.9578174	0.5392405	0.91881216	1.0	890	tags=17%, list=12%, signal=20%
MASSARWEH_TAMOXIFEN_RESISTANCE_DN	MASSARWEH_TAMOXIFEN_RESISTANCE_DN		122	0.28154385	0.95768195	0.58127016	0.91858286	1.0	958	tags=16%, list=13%, signal=19%
GENTILE_UV_RESPONSE_CLUSTER_D6	GENTILE_UV_RESPONSE_CLUSTER_D6		31	0.3430599	0.9564884	0.53097343	0.92116475	1.0	2064	tags=35%, list=28%, signal=49%
SIG_BCR_SIGNALING_PATHWAY	SIG_BCR_SIGNALING_PATHWAY		32	0.3411937	0.9564789	0.5318352	0.9205963	1.0	2285	tags=34%, list=31%, signal=49%
REACTOME_OXYGEN_DEPENDENT_PROLINE_HYDROXYLATION_OF_HYPOXIA_INDUCIBLE_FACTOR_ALPHA	REACTOME_OXYGEN_DEPENDENT_PROLINE_HYDROXYLATION_OF_HYPOXIA_INDUCIBLE_FACTOR_ALPHA		11	0.42270592	0.9563684	0.55042017	0.92029613	1.0	2743	tags=45%, list=37%, signal=72%
PETRETTO_CARDIAC_HYPERTROPHY	PETRETTO_CARDIAC_HYPERTROPHY		31	0.3378355	0.95590615	0.54146343	0.92099	1.0	2263	tags=48%, list=30%, signal=69%
AIYAR_COBRA1_TARGETS_UP	AIYAR_COBRA1_TARGETS_UP		27	0.35019654	0.95587915	0.55266416	0.9204668	1.0	2297	tags=44%, list=31%, signal=64%
BIOCARTA_FMLP_PATHWAY	BIOCARTA_FMLP_PATHWAY		18	0.3797425	0.95574313	0.5398111	0.92024267	1.0	832	tags=17%, list=11%, signal=19%
GALLUZZI_PERMEABILIZE_MITOCHONDRIA	GALLUZZI_PERMEABILIZE_MITOCHONDRIA		29	0.34414035	0.9555655	0.54556805	0.92015374	1.0	1921	tags=28%, list=26%, signal=37%
MIPS_TNF_ALPHA_NF_KAPPA_B_SIGNALING_COMPLEX_6	MIPS_TNF_ALPHA_NF_KAPPA_B_SIGNALING_COMPLEX_6		12	0.4156974	0.955197	0.52414775	0.9205541	1.0	492	tags=17%, list=7%, signal=18%
PHONG_TNF_RESPONSE_VIA_P38_COMPLETE	PHONG_TNF_RESPONSE_VIA_P38_COMPLETE		168	0.27313143	0.95512795	0.5898235	0.9201479	1.0	1939	tags=33%, list=26%, signal=43%
MARTINEZ_RB1_TARGETS_DN	MARTINEZ_RB1_TARGETS_DN		273	0.26315048	0.9551141	0.6289181	0.9195868	1.0	1396	tags=20%, list=19%, signal=23%
BORCZUK_MALIGNANT_MESOTHELIOMA_DN	BORCZUK_MALIGNANT_MESOTHELIOMA_DN		51	0.30911425	0.95506084	0.5487239	0.91912323	1.0	1939	tags=29%, list=26%, signal=40%
WENDT_COHESIN_TARGETS_UP	WENDT_COHESIN_TARGETS_UP		21	0.36914822	0.95505124	0.542595	0.91855764	1.0	1528	tags=24%, list=21%, signal=30%
BENPORATH_MYC_TARGETS_WITH_EBOX	BENPORATH_MYC_TARGETS_WITH_EBOX		161	0.27464977	0.95450926	0.5964912	0.9194348	1.0	976	tags=13%, list=13%, signal=15%
KYNG_RESPONSE_TO_H2O2_VIA_ERCC6	KYNG_RESPONSE_TO_H2O2_VIA_ERCC6		12	0.41121516	0.9539564	0.52539915	0.9202589	1.0	3549	tags=75%, list=48%, signal=143%
DAIRKEE_TERT_TARGETS_DN	DAIRKEE_TERT_TARGETS_DN		50	0.3126169	0.95365775	0.54714787	0.9204897	1.0	2471	tags=44%, list=33%, signal=65%
MARTINEZ_RB1_AND_TP53_TARGETS_UP	MARTINEZ_RB1_AND_TP53_TARGETS_UP		328	0.263662	0.9529633	0.65090543	0.9217296	1.0	1886	tags=25%, list=25%, signal=32%
BROWNE_HCMV_INFECTION_4HR_DN	BROWNE_HCMV_INFECTION_4HR_DN		160	0.2723631	0.95292866	0.60983264	0.9212183	1.0	1832	tags=29%, list=25%, signal=37%
PICCALUGA_ANGIOIMMUNOBLASTIC_LYMPHOMA_UP	PICCALUGA_ANGIOIMMUNOBLASTIC_LYMPHOMA_UP		138	0.27333763	0.9523935	0.6056485	0.9220858	1.0	2401	tags=37%, list=32%, signal=54%
YANG_BREAST_CANCER_ESR1_LASER_UP	YANG_BREAST_CANCER_ESR1_LASER_UP		17	0.37752414	0.9520883	0.53815264	0.9222674	1.0	1737	tags=41%, list=23%, signal=54%
MIPS_TFIID_BETA_COMPLEX	MIPS_TFIID_BETA_COMPLEX		10	0.4325424	0.9519902	0.5476879	0.9219211	1.0	943	tags=30%, list=13%, signal=34%
PID_BCR_5PATHWAY	PID_BCR_5PATHWAY		44	0.31870857	0.9517684	0.5702576	0.9219399	1.0	2209	tags=32%, list=30%, signal=45%
TENEDINI_MEGAKARYOCYTE_MARKERS	TENEDINI_MEGAKARYOCYTE_MARKERS		38	0.32902464	0.9517069	0.5669481	0.9215114	1.0	619	tags=11%, list=8%, signal=11%
WIELAND_UP_BY_HBV_INFECTION	WIELAND_UP_BY_HBV_INFECTION		88	0.29118297	0.95100445	0.5667396	0.9227261	1.0	189	tags=9%, list=3%, signal=9%
ROVERSI_GLIOMA_LOH_REGIONS	ROVERSI_GLIOMA_LOH_REGIONS		19	0.36688703	0.95047826	0.5535714	0.92354274	1.0	103	tags=11%, list=1%, signal=11%
REACTOME_SIGNALING_BY_GPCR	REACTOME_SIGNALING_BY_GPCR		206	0.2645704	0.9504001	0.62781185	0.92314595	1.0	1326	tags=20%, list=18%, signal=24%
REACTOME_PI_3K_CASCADE	REACTOME_PI_3K_CASCADE		23	0.35418683	0.9503527	0.5477387	0.92268217	1.0	2001	tags=35%, list=27%, signal=47%
ROVERSI_GLIOMA_COPY_NUMBER_DN	ROVERSI_GLIOMA_COPY_NUMBER_DN		26	0.34494233	0.94973016	0.56832695	0.9236663	1.0	1441	tags=27%, list=19%, signal=33%
BERENJENO_TRANSFORMED_BY_RHOA_FOREVER_DN	BERENJENO_TRANSFORMED_BY_RHOA_FOREVER_DN		15	0.38645637	0.9487274	0.5441176	0.92571664	1.0	2035	tags=47%, list=27%, signal=64%
KEGG_PROPANOATE_METABOLISM	KEGG_PROPANOATE_METABOLISM		23	0.353532	0.94815034	0.548	0.9266004	1.0	919	tags=17%, list=12%, signal=20%
DAVICIONI_PAX_FOXO1_SIGNATURE_IN_ARMS_UP	DAVICIONI_PAX_FOXO1_SIGNATURE_IN_ARMS_UP		45	0.31040543	0.94807965	0.56563246	0.926185	1.0	889	tags=16%, list=12%, signal=18%
NUTT_GBM_VS_AO_GLIOMA_DN	NUTT_GBM_VS_AO_GLIOMA_DN		36	0.32728937	0.94765043	0.57808566	0.92672724	1.0	2822	tags=44%, list=38%, signal=71%
REACTOME_EXTRACELLULAR_MATRIX_ORGANIZATION	REACTOME_EXTRACELLULAR_MATRIX_ORGANIZATION		44	0.3113933	0.9474785	0.5628816	0.92656887	1.0	1749	tags=30%, list=24%, signal=38%
IKEDA_MIR1_TARGETS_UP	IKEDA_MIR1_TARGETS_UP		39	0.32087573	0.9470155	0.56642514	0.92715377	1.0	2212	tags=41%, list=30%, signal=58%
REACTOME_SEMAPHORIN_INTERACTIONS	REACTOME_SEMAPHORIN_INTERACTIONS		42	0.3170296	0.9467863	0.56763285	0.92716825	1.0	1542	tags=26%, list=21%, signal=33%
ARACNE_PHOX2B-NETWORK	ARACNE_PHOX2B-NETWORK		50	0.30866042	0.9453339	0.5783972	0.9304604	1.0	1731	tags=26%, list=23%, signal=34%
SIG_PIP3_SIGNALING_IN_CARDIAC_MYOCTES	SIG_PIP3_SIGNALING_IN_CARDIAC_MYOCTES		48	0.31153277	0.94531137	0.5675676	0.92993325	1.0	2551	tags=42%, list=34%, signal=63%
ST_INTEGRIN_SIGNALING_PATHWAY	ST_INTEGRIN_SIGNALING_PATHWAY		52	0.30327132	0.9451225	0.5466053	0.9298527	1.0	1921	tags=33%, list=26%, signal=44%
REACTOME_KERATAN_SULFATE_KERATIN_METABOLISM	REACTOME_KERATAN_SULFATE_KERATIN_METABOLISM		18	0.36974958	0.9444392	0.5558546	0.93105197	1.0	337	tags=11%, list=5%, signal=12%
GAUSSMANN_MLL_AF4_FUSION_TARGETS_A_UP	GAUSSMANN_MLL_AF4_FUSION_TARGETS_A_UP		95	0.28515643	0.94419783	0.594124	0.9311061	1.0	2380	tags=37%, list=32%, signal=53%
PID_FCER1PATHWAY	PID_FCER1PATHWAY		36	0.3208587	0.94339305	0.5753262	0.93260914	1.0	2154	tags=39%, list=29%, signal=54%
SIG_REGULATION_OF_THE_ACTIN_CYTOSKELETON_BY_RHO_GTPASES	SIG_REGULATION_OF_THE_ACTIN_CYTOSKELETON_BY_RHO_GTPASES		23	0.3548433	0.94335616	0.5602028	0.9321244	1.0	2378	tags=35%, list=32%, signal=51%
WAKABAYASHI_ADIPOGENESIS_PPARG_RXRA_BOUND_36HR	WAKABAYASHI_ADIPOGENESIS_PPARG_RXRA_BOUND_36HR		77	0.29363966	0.9432651	0.6076503	0.9317652	1.0	1862	tags=29%, list=25%, signal=38%
REACTOME_APOPTOSIS	REACTOME_APOPTOSIS		94	0.2852673	0.94317347	0.60044396	0.93141645	1.0	2890	tags=43%, list=39%, signal=69%
SEITZ_NEOPLASTIC_TRANSFORMATION_BY_8P_DELETION_UP	SEITZ_NEOPLASTIC_TRANSFORMATION_BY_8P_DELETION_UP		43	0.31579217	0.942756	0.5592417	0.93188673	1.0	2808	tags=53%, list=38%, signal=85%
REACTOME_TGF_BETA_RECEPTOR_SIGNALING_ACTIVATES_SMADS	REACTOME_TGF_BETA_RECEPTOR_SIGNALING_ACTIVATES_SMADS		16	0.38184452	0.942632	0.5472973	0.93163985	1.0	3068	tags=50%, list=41%, signal=85%
PECE_MAMMARY_STEM_CELL_UP	PECE_MAMMARY_STEM_CELL_UP		93	0.28177238	0.9420886	0.5881709	0.9324548	1.0	2065	tags=31%, list=28%, signal=43%
YAO_TEMPORAL_RESPONSE_TO_PROGESTERONE_CLUSTER_10	YAO_TEMPORAL_RESPONSE_TO_PROGESTERONE_CLUSTER_10		50	0.30519894	0.9418401	0.578199	0.9324922	1.0	3084	tags=48%, list=41%, signal=81%
GOZGIT_ESR1_TARGETS_UP	GOZGIT_ESR1_TARGETS_UP		74	0.29378015	0.94129014	0.5907591	0.93334275	1.0	1314	tags=23%, list=18%, signal=28%
BILANGES_RAPAMYCIN_SENSITIVE_VIA_TSC1_AND_TSC2	BILANGES_RAPAMYCIN_SENSITIVE_VIA_TSC1_AND_TSC2		58	0.3001478	0.9410497	0.5661253	0.93333185	1.0	2248	tags=33%, list=30%, signal=47%
KEGG_STARCH_AND_SUCROSE_METABOLISM	KEGG_STARCH_AND_SUCROSE_METABOLISM		13	0.40167516	0.9409437	0.54520917	0.9330104	1.0	1667	tags=23%, list=22%, signal=30%
HASLINGER_B_CLL_WITH_13Q14_DELETION	HASLINGER_B_CLL_WITH_13Q14_DELETION		18	0.36870885	0.9409251	0.54605263	0.93247145	1.0	2399	tags=44%, list=32%, signal=65%
DELACROIX_RAR_TARGETS_DN	DELACROIX_RAR_TARGETS_DN		14	0.39384744	0.94090736	0.5587829	0.9319313	1.0	304	tags=14%, list=4%, signal=15%
KEGG_GLUTATHIONE_METABOLISM	KEGG_GLUTATHIONE_METABOLISM		31	0.3321649	0.9404387	0.5673317	0.932594	1.0	993	tags=23%, list=13%, signal=26%
KEGG_LEUKOCYTE_TRANSENDOTHELIAL_MIGRATION	KEGG_LEUKOCYTE_TRANSENDOTHELIAL_MIGRATION		52	0.30164295	0.94042337	0.5547866	0.93205875	1.0	2129	tags=37%, list=29%, signal=51%
REACTOME_NEF_MEDIATES_DOWN_MODULATION_OF_CELL_SURFACE_RECEPTORS_BY_RECRUITING_THEM_TO_CLATHRIN_ADAPTERS	REACTOME_NEF_MEDIATES_DOWN_MODULATION_OF_CELL_SURFACE_RECEPTORS_BY_RECRUITING_THEM_TO_CLATHRIN_ADAPTERS		12	0.4059773	0.9402207	0.5485714	0.9319948	1.0	1117	tags=17%, list=15%, signal=20%
GAUSSMANN_MLL_AF4_FUSION_TARGETS_B_UP	GAUSSMANN_MLL_AF4_FUSION_TARGETS_B_UP		16	0.3764917	0.9400483	0.5361367	0.93185544	1.0	1313	tags=31%, list=18%, signal=38%
KEGG_FOCAL_ADHESION	KEGG_FOCAL_ADHESION		125	0.2731883	0.93979996	0.62994653	0.93191767	1.0	1564	tags=26%, list=21%, signal=33%
NAKAMURA_METASTASIS_MODEL_DN	NAKAMURA_METASTASIS_MODEL_DN		20	0.36661315	0.93967015	0.5473684	0.9316507	1.0	1489	tags=30%, list=20%, signal=37%
PID_TRAIL_PATHWAY	PID_TRAIL_PATHWAY		16	0.3760927	0.93963355	0.55918366	0.93116724	1.0	368	tags=13%, list=5%, signal=13%
KEGG_RIG_I_LIKE_RECEPTOR_SIGNALING_PATHWAY	KEGG_RIG_I_LIKE_RECEPTOR_SIGNALING_PATHWAY		30	0.33316654	0.9392631	0.58048165	0.9315584	1.0	652	tags=20%, list=9%, signal=22%
YANG_BREAST_CANCER_ESR1_LASER_DN	YANG_BREAST_CANCER_ESR1_LASER_DN		38	0.323832	0.9390642	0.58162034	0.9314759	1.0	888	tags=26%, list=12%, signal=30%
ZHAN_MULTIPLE_MYELOMA_CD1_VS_CD2_UP	ZHAN_MULTIPLE_MYELOMA_CD1_VS_CD2_UP		36	0.32440665	0.9390319	0.57512313	0.9309836	1.0	751	tags=14%, list=10%, signal=15%
GNATENKO_PLATELET_SIGNATURE	GNATENKO_PLATELET_SIGNATURE		33	0.331403	0.9384053	0.5686275	0.93205464	1.0	465	tags=9%, list=6%, signal=10%
BIOCARTA_CARDIACEGF_PATHWAY	BIOCARTA_CARDIACEGF_PATHWAY		14	0.3894574	0.9383911	0.55074424	0.9315142	1.0	1445	tags=36%, list=19%, signal=44%
VANDESLUIS_COMMD1_TARGETS_GROUP_3_UP	VANDESLUIS_COMMD1_TARGETS_GROUP_3_UP		43	0.31102955	0.9383756	0.5770142	0.9309687	1.0	985	tags=21%, list=13%, signal=24%
KYNG_WERNER_SYNDROM_AND_NORMAL_AGING_UP	KYNG_WERNER_SYNDROM_AND_NORMAL_AGING_UP		56	0.29991263	0.9383316	0.59314287	0.93050045	1.0	2073	tags=34%, list=28%, signal=47%
PID_THROMBIN_PAR1_PATHWAY	PID_THROMBIN_PAR1_PATHWAY		26	0.3403908	0.93821144	0.5538462	0.9302229	1.0	1557	tags=23%, list=21%, signal=29%
HADDAD_T_LYMPHOCYTE_AND_NK_PROGENITOR_UP	HADDAD_T_LYMPHOCYTE_AND_NK_PROGENITOR_UP		59	0.29916224	0.93794656	0.57482994	0.9303413	1.0	1681	tags=29%, list=23%, signal=37%
WILSON_PROTEASES_AT_TUMOR_BONE_INTERFACE_UP	WILSON_PROTEASES_AT_TUMOR_BONE_INTERFACE_UP		16	0.38455525	0.9378414	0.556157	0.9300342	1.0	2047	tags=38%, list=28%, signal=52%
PANGAS_TUMOR_SUPPRESSION_BY_SMAD1_AND_SMAD5_UP	PANGAS_TUMOR_SUPPRESSION_BY_SMAD1_AND_SMAD5_UP		61	0.29880378	0.9368308	0.5846501	0.93204135	1.0	1227	tags=23%, list=16%, signal=27%
BURTON_ADIPOGENESIS_2	BURTON_ADIPOGENESIS_2		48	0.30412382	0.93665093	0.57413995	0.93194014	1.0	1240	tags=21%, list=17%, signal=25%
ASTON_MAJOR_DEPRESSIVE_DISORDER_DN	ASTON_MAJOR_DEPRESSIVE_DISORDER_DN		107	0.27927825	0.93570465	0.59978306	0.93372494	1.0	2751	tags=48%, list=37%, signal=75%
NIKOLSKY_BREAST_CANCER_12Q13_Q21_AMPLICON	NIKOLSKY_BREAST_CANCER_12Q13_Q21_AMPLICON		20	0.36336845	0.93569374	0.5740741	0.9331686	1.0	1518	tags=35%, list=20%, signal=44%
REACTOME_SIGNAL_TRANSDUCTION_BY_L1	REACTOME_SIGNAL_TRANSDUCTION_BY_L1		25	0.3485276	0.9356141	0.5692308	0.9328119	1.0	1883	tags=24%, list=25%, signal=32%
SIMBULAN_UV_RESPONSE_IMMORTALIZED_DN	SIMBULAN_UV_RESPONSE_IMMORTALIZED_DN		25	0.3429177	0.9352951	0.5842839	0.93302554	1.0	2466	tags=52%, list=33%, signal=78%
REACTOME_SIGNALING_BY_ROBO_RECEPTOR	REACTOME_SIGNALING_BY_ROBO_RECEPTOR		22	0.35418046	0.93465763	0.57255936	0.934061	1.0	1822	tags=32%, list=24%, signal=42%
JECHLINGER_EPITHELIAL_TO_MESENCHYMAL_TRANSITION_UP	JECHLINGER_EPITHELIAL_TO_MESENCHYMAL_TRANSITION_UP		44	0.31312928	0.9342132	0.56161135	0.9346093	1.0	1482	tags=32%, list=20%, signal=40%
SCHRAETS_MLL_TARGETS_UP	SCHRAETS_MLL_TARGETS_UP		22	0.35224155	0.93415034	0.5693717	0.9341724	1.0	684	tags=23%, list=9%, signal=25%
SU_PANCREAS	SU_PANCREAS		13	0.39082912	0.93412626	0.5785814	0.93365973	1.0	2598	tags=54%, list=35%, signal=83%
REACTOME_DEGRADATION_OF_THE_EXTRACELLULAR_MATRIX	REACTOME_DEGRADATION_OF_THE_EXTRACELLULAR_MATRIX		14	0.39307278	0.934115	0.56948227	0.9331099	1.0	23	tags=7%, list=0%, signal=7%
CROMER_TUMORIGENESIS_UP	CROMER_TUMORIGENESIS_UP		42	0.31816006	0.9339879	0.58600235	0.93287164	1.0	1968	tags=38%, list=26%, signal=52%
FONTAINE_PAPILLARY_THYROID_CARCINOMA_DN	FONTAINE_PAPILLARY_THYROID_CARCINOMA_DN		32	0.33093852	0.93310845	0.5893536	0.93448484	1.0	836	tags=19%, list=11%, signal=21%
KEGG_GLYCOSAMINOGLYCAN_BIOSYNTHESIS_HEPARAN_SULFATE	KEGG_GLYCOSAMINOGLYCAN_BIOSYNTHESIS_HEPARAN_SULFATE		12	0.4052387	0.9330814	0.5716216	0.9339909	1.0	875	tags=17%, list=12%, signal=19%
JI_RESPONSE_TO_FSH_UP	JI_RESPONSE_TO_FSH_UP		54	0.29785118	0.9327439	0.6053551	0.9342601	1.0	1787	tags=22%, list=24%, signal=29%
SMID_BREAST_CANCER_LUMINAL_A_UP	SMID_BREAST_CANCER_LUMINAL_A_UP		44	0.3115662	0.9327391	0.58780485	0.93369865	1.0	1290	tags=25%, list=17%, signal=30%
KEGG_GAP_JUNCTION	KEGG_GAP_JUNCTION		55	0.29775152	0.9321673	0.6060255	0.9345619	1.0	1319	tags=20%, list=18%, signal=24%
NAKAMURA_CANCER_MICROENVIRONMENT_UP	NAKAMURA_CANCER_MICROENVIRONMENT_UP		12	0.409093	0.93119437	0.5882353	0.93643004	1.0	1905	tags=50%, list=26%, signal=67%
POTTI_DOCETAXEL_SENSITIVITY	POTTI_DOCETAXEL_SENSITIVITY		41	0.31694114	0.9310141	0.59626603	0.93633604	1.0	1838	tags=27%, list=25%, signal=35%
DACOSTA_UV_RESPONSE_VIA_ERCC3_TTD_DN	DACOSTA_UV_RESPONSE_VIA_ERCC3_TTD_DN		52	0.30093682	0.9304566	0.56678283	0.9371328	1.0	1017	tags=25%, list=14%, signal=29%
KEGG_FC_EPSILON_RI_SIGNALING_PATHWAY	KEGG_FC_EPSILON_RI_SIGNALING_PATHWAY		34	0.32496986	0.9304477	0.6056166	0.9365806	1.0	1319	tags=24%, list=18%, signal=28%
REACTOME_SMAD2_SMAD3_SMAD4_HETEROTRIMER_REGULATES_TRANSCRIPTION	REACTOME_SMAD2_SMAD3_SMAD4_HETEROTRIMER_REGULATES_TRANSCRIPTION		15	0.37652758	0.93018377	0.5745258	0.93667084	1.0	3013	tags=53%, list=41%, signal=89%
DELACROIX_RARG_BOUND_MEF	DELACROIX_RARG_BOUND_MEF		188	0.26232693	0.9301672	0.6532922	0.9361375	1.0	927	tags=14%, list=12%, signal=16%
MIKKELSEN_MEF_ICP_WITH_H3K4ME3_AND_H3K27ME3	MIKKELSEN_MEF_ICP_WITH_H3K4ME3_AND_H3K27ME3		18	0.36537156	0.929254	0.5618421	0.937809	1.0	259	tags=17%, list=3%, signal=17%
KORKOLA_EMBRYONAL_CARCINOMA_UP	KORKOLA_EMBRYONAL_CARCINOMA_UP		22	0.3465199	0.9286435	0.58900523	0.9386997	1.0	1690	tags=36%, list=23%, signal=47%
BIOCARTA_PTDINS_PATHWAY	BIOCARTA_PTDINS_PATHWAY		17	0.37299833	0.9285911	0.59310347	0.9382366	1.0	2653	tags=41%, list=36%, signal=64%
ONKEN_UVEAL_MELANOMA_DN	ONKEN_UVEAL_MELANOMA_DN		406	0.25260904	0.92852145	0.7261785	0.9378399	1.0	2578	tags=38%, list=35%, signal=56%
PID_HEDGEHOG_GLIPATHWAY	PID_HEDGEHOG_GLIPATHWAY		31	0.32749328	0.9282692	0.5922693	0.93789	1.0	591	tags=10%, list=8%, signal=10%
BHATI_G2M_ARREST_BY_2METHOXYESTRADIOL_DN	BHATI_G2M_ARREST_BY_2METHOXYESTRADIOL_DN		65	0.28915623	0.9273528	0.603211	0.93957686	1.0	1915	tags=26%, list=26%, signal=35%
VILIMAS_NOTCH1_TARGETS_UP	VILIMAS_NOTCH1_TARGETS_UP		23	0.3418479	0.92718405	0.55941254	0.93941915	1.0	1352	tags=30%, list=18%, signal=37%
POTTI_ETOPOSIDE_SENSITIVITY	POTTI_ETOPOSIDE_SENSITIVITY		22	0.3496205	0.9270375	0.58876115	0.9392158	1.0	2401	tags=45%, list=32%, signal=67%
BANDRES_RESPONSE_TO_CARMUSTIN_MGMT_24HR_DN	BANDRES_RESPONSE_TO_CARMUSTIN_MGMT_24HR_DN		15	0.3758984	0.9268766	0.5748663	0.93905467	1.0	1685	tags=33%, list=23%, signal=43%
REACTOME_MITOCHONDRIAL_FATTY_ACID_BETA_OXIDATION	REACTOME_MITOCHONDRIAL_FATTY_ACID_BETA_OXIDATION		11	0.40705454	0.9266971	0.57730496	0.93890965	1.0	3506	tags=64%, list=47%, signal=120%
KEGG_GALACTOSE_METABOLISM	KEGG_GALACTOSE_METABOLISM		15	0.382046	0.92523944	0.572	0.94186056	1.0	1224	tags=13%, list=16%, signal=16%
WANG_LSD1_TARGETS_UP	WANG_LSD1_TARGETS_UP		15	0.3751787	0.9245617	0.57756233	0.9429638	1.0	790	tags=27%, list=11%, signal=30%
CHYLA_CBFA2T3_TARGETS_DN	CHYLA_CBFA2T3_TARGETS_DN		94	0.2786039	0.924557	0.6295082	0.94240576	1.0	1473	tags=24%, list=20%, signal=30%
SATO_SILENCED_BY_METHYLATION_IN_PANCREATIC_CANCER_2	SATO_SILENCED_BY_METHYLATION_IN_PANCREATIC_CANCER_2		26	0.3377785	0.9244546	0.59466326	0.9420707	1.0	222	tags=12%, list=3%, signal=12%
LINSLEY_MIR16_TARGETS	LINSLEY_MIR16_TARGETS		109	0.2735931	0.924075	0.6447793	0.94237524	1.0	1862	tags=27%, list=25%, signal=35%
TAKEDA_TARGETS_OF_NUP98_HOXA9_FUSION_3D_UP	TAKEDA_TARGETS_OF_NUP98_HOXA9_FUSION_3D_UP		80	0.28312653	0.92388916	0.621195	0.9422302	1.0	2069	tags=34%, list=28%, signal=46%
VALK_AML_WITH_11Q23_REARRANGED	VALK_AML_WITH_11Q23_REARRANGED		11	0.40485266	0.9238707	0.6011236	0.94170266	1.0	1636	tags=36%, list=22%, signal=47%
REACTOME_INTERFERON_ALPHA_BETA_SIGNALING	REACTOME_INTERFERON_ALPHA_BETA_SIGNALING		31	0.32627892	0.9235628	0.59134614	0.9419055	1.0	1801	tags=29%, list=24%, signal=38%
BIOCARTA_CARM1_PATHWAY	BIOCARTA_CARM1_PATHWAY		11	0.40828228	0.923407	0.57758623	0.94172305	1.0	2001	tags=45%, list=27%, signal=62%
CHANDRAN_METASTASIS_TOP50_DN	CHANDRAN_METASTASIS_TOP50_DN		27	0.33998886	0.923133	0.6010101	0.9418227	1.0	2508	tags=41%, list=34%, signal=61%
HOWLIN_CITED1_TARGETS_1_DN	HOWLIN_CITED1_TARGETS_1_DN		25	0.337701	0.92307717	0.59398496	0.94138634	1.0	1217	tags=24%, list=16%, signal=29%
KOKKINAKIS_METHIONINE_DEPRIVATION_48HR_UP	KOKKINAKIS_METHIONINE_DEPRIVATION_48HR_UP		86	0.2812901	0.9229507	0.6284153	0.94111794	1.0	364	tags=9%, list=5%, signal=10%
SCHLESINGER_METHYLATED_DE_NOVO_IN_CANCER	SCHLESINGER_METHYLATED_DE_NOVO_IN_CANCER		39	0.3163061	0.92216134	0.5775336	0.94244933	1.0	960	tags=18%, list=13%, signal=21%
PID_IGF1_PATHWAY	PID_IGF1_PATHWAY		24	0.3421666	0.9221031	0.5809285	0.9420225	1.0	2551	tags=50%, list=34%, signal=76%
TAKEDA_TARGETS_OF_NUP98_HOXA9_FUSION_10D_UP	TAKEDA_TARGETS_OF_NUP98_HOXA9_FUSION_10D_UP		81	0.28195357	0.92200017	0.63076925	0.9417079	1.0	2148	tags=37%, list=29%, signal=52%
GENTILE_UV_RESPONSE_CLUSTER_D1	GENTILE_UV_RESPONSE_CLUSTER_D1		14	0.37937695	0.92186224	0.58038145	0.9414564	1.0	1902	tags=36%, list=26%, signal=48%
PID_P73PATHWAY	PID_P73PATHWAY		45	0.3093984	0.9212211	0.61150235	0.94241834	1.0	1922	tags=27%, list=26%, signal=36%
KEGG_CITRATE_CYCLE_TCA_CYCLE	KEGG_CITRATE_CYCLE_TCA_CYCLE		27	0.3310439	0.921023	0.574359	0.9423355	1.0	1940	tags=30%, list=26%, signal=40%
ZHAN_MULTIPLE_MYELOMA_HP_UP	ZHAN_MULTIPLE_MYELOMA_HP_UP		19	0.36507317	0.92088795	0.58984375	0.9420935	1.0	2869	tags=53%, list=39%, signal=85%
WAKABAYASHI_ADIPOGENESIS_PPARG_BOUND_36HR	WAKABAYASHI_ADIPOGENESIS_PPARG_BOUND_36HR		16	0.37460762	0.9199731	0.5740988	0.94383794	1.0	166	tags=13%, list=2%, signal=13%
BIOCARTA_RAC1_PATHWAY	BIOCARTA_RAC1_PATHWAY		13	0.38696936	0.91993433	0.58625525	0.9433691	1.0	2280	tags=38%, list=31%, signal=55%
MORI_PLASMA_CELL_DN	MORI_PLASMA_CELL_DN		15	0.37652656	0.91989434	0.6059379	0.9428952	1.0	1474	tags=33%, list=20%, signal=41%
MULLIGHAN_NPM1_MUTATED_SIGNATURE_1_DN	MULLIGHAN_NPM1_MUTATED_SIGNATURE_1_DN		88	0.28128093	0.91968536	0.6387665	0.9428727	1.0	2082	tags=32%, list=28%, signal=44%
KEGG_NEUROTROPHIN_SIGNALING_PATHWAY	KEGG_NEUROTROPHIN_SIGNALING_PATHWAY		74	0.2857602	0.91967344	0.6302142	0.9423431	1.0	2346	tags=32%, list=32%, signal=47%
GARGALOVIC_RESPONSE_TO_OXIDIZED_PHOSPHOLIPIDS_GREY_DN	GARGALOVIC_RESPONSE_TO_OXIDIZED_PHOSPHOLIPIDS_GREY_DN		34	0.32204837	0.9196491	0.61160153	0.94182783	1.0	1679	tags=32%, list=23%, signal=42%
HUANG_DASATINIB_RESISTANCE_UP	HUANG_DASATINIB_RESISTANCE_UP		57	0.2970174	0.91958106	0.6152968	0.941428	1.0	2034	tags=35%, list=27%, signal=48%
MARKS_HDAC_TARGETS_UP	MARKS_HDAC_TARGETS_UP		13	0.39244616	0.9195455	0.57887703	0.94095284	1.0	2353	tags=54%, list=32%, signal=79%
TAKEDA_TARGETS_OF_NUP98_HOXA9_FUSION_16D_UP	TAKEDA_TARGETS_OF_NUP98_HOXA9_FUSION_16D_UP		72	0.28553253	0.91949356	0.6092715	0.9405141	1.0	2029	tags=36%, list=27%, signal=49%
LIU_PROSTATE_CANCER_UP	LIU_PROSTATE_CANCER_UP		50	0.29927683	0.9193233	0.6084337	0.94036317	1.0	2631	tags=44%, list=35%, signal=68%
AZARE_NEOPLASTIC_TRANSFORMATION_BY_STAT3_DN	AZARE_NEOPLASTIC_TRANSFORMATION_BY_STAT3_DN		89	0.27544102	0.91929156	0.64668095	0.9398776	1.0	2034	tags=37%, list=27%, signal=50%
GARGALOVIC_RESPONSE_TO_OXIDIZED_PHOSPHOLIPIDS_BLUE_UP	GARGALOVIC_RESPONSE_TO_OXIDIZED_PHOSPHOLIPIDS_BLUE_UP		63	0.29039374	0.91889536	0.60366553	0.9402574	1.0	1787	tags=32%, list=24%, signal=41%
STEIN_ESRRA_TARGETS_UP	STEIN_ESRRA_TARGETS_UP		283	0.2542265	0.9188215	0.7164634	0.9398727	1.0	1815	tags=23%, list=24%, signal=30%
SIMBULAN_PARP1_TARGETS_UP	SIMBULAN_PARP1_TARGETS_UP		23	0.3430449	0.91779333	0.58322906	0.9418013	1.0	890	tags=22%, list=12%, signal=25%
KRIGE_RESPONSE_TO_TOSEDOSTAT_6HR_UP	KRIGE_RESPONSE_TO_TOSEDOSTAT_6HR_UP		481	0.24923776	0.91752565	0.758517	0.94188285	1.0	1839	tags=25%, list=25%, signal=31%
BIOCARTA_IL3_PATHWAY	BIOCARTA_IL3_PATHWAY		11	0.4076134	0.9174171	0.58485276	0.94157344	1.0	1921	tags=36%, list=26%, signal=49%
FLECHNER_PBL_KIDNEY_TRANSPLANT_OK_VS_DONOR_UP	FLECHNER_PBL_KIDNEY_TRANSPLANT_OK_VS_DONOR_UP		132	0.26559323	0.91676277	0.67336154	0.9425539	1.0	2948	tags=41%, list=40%, signal=67%
TAYLOR_METHYLATED_IN_ACUTE_LYMPHOBLASTIC_LEUKEMIA	TAYLOR_METHYLATED_IN_ACUTE_LYMPHOBLASTIC_LEUKEMIA		33	0.3217201	0.9161518	0.5974843	0.94340914	1.0	1239	tags=21%, list=17%, signal=25%
REACTOME_DOWNSTREAM_SIGNALING_OF_ACTIVATED_FGFR	REACTOME_DOWNSTREAM_SIGNALING_OF_ACTIVATED_FGFR		44	0.30568942	0.9159476	0.61177886	0.94331783	1.0	2285	tags=36%, list=31%, signal=52%
PID_LYMPHANGIOGENESIS_PATHWAY	PID_LYMPHANGIOGENESIS_PATHWAY		18	0.36385655	0.9155278	0.59395534	0.9437232	1.0	2001	tags=39%, list=27%, signal=53%
REACTOME_IL_3_5_AND_GM_CSF_SIGNALING	REACTOME_IL_3_5_AND_GM_CSF_SIGNALING		22	0.35060987	0.91540265	0.590604	0.94346243	1.0	2154	tags=45%, list=29%, signal=64%
RUAN_RESPONSE_TO_TNF_DN	RUAN_RESPONSE_TO_TNF_DN		54	0.2973998	0.9149544	0.6333725	0.9440081	1.0	1869	tags=28%, list=25%, signal=37%
PID_BETACATENIN_DEG_PATHWAY	PID_BETACATENIN_DEG_PATHWAY		11	0.4091497	0.91474885	0.59591836	0.9439406	1.0	101	tags=9%, list=1%, signal=9%
BIOCARTA_IL2_PATHWAY	BIOCARTA_IL2_PATHWAY		14	0.3868474	0.91442937	0.58055925	0.9441394	1.0	1117	tags=29%, list=15%, signal=34%
DAVICIONI_RHABDOMYOSARCOMA_PAX_FOXO1_FUSION_UP	DAVICIONI_RHABDOMYOSARCOMA_PAX_FOXO1_FUSION_UP		49	0.30018428	0.9143866	0.6145833	0.9436731	1.0	645	tags=16%, list=9%, signal=18%
VART_KSHV_INFECTION_ANGIOGENIC_MARKERS_DN	VART_KSHV_INFECTION_ANGIOGENIC_MARKERS_DN		62	0.29094437	0.9139958	0.61521	0.94403446	1.0	1317	tags=24%, list=18%, signal=29%
REACTOME_TRIF_MEDIATED_TLR3_SIGNALING	REACTOME_TRIF_MEDIATED_TLR3_SIGNALING		46	0.30011266	0.9138403	0.6096386	0.9438597	1.0	885	tags=17%, list=12%, signal=20%
POTTI_CYTOXAN_SENSITIVITY	POTTI_CYTOXAN_SENSITIVITY		31	0.32249922	0.91339445	0.60532993	0.94435245	1.0	2570	tags=29%, list=35%, signal=44%
KYNG_ENVIRONMENTAL_STRESS_RESPONSE_NOT_BY_4NQO_IN_WS	KYNG_ENVIRONMENTAL_STRESS_RESPONSE_NOT_BY_4NQO_IN_WS		29	0.33393946	0.91329026	0.61820483	0.94403285	1.0	2425	tags=45%, list=33%, signal=66%
NIKOLSKY_BREAST_CANCER_5P15_AMPLICON	NIKOLSKY_BREAST_CANCER_5P15_AMPLICON		11	0.40863532	0.91306645	0.6125	0.9440305	1.0	1577	tags=27%, list=21%, signal=35%
KEGG_LONG_TERM_POTENTIATION	KEGG_LONG_TERM_POTENTIATION		37	0.31280917	0.91215247	0.59903383	0.94561994	1.0	1319	tags=22%, list=18%, signal=26%
GHANDHI_DIRECT_IRRADIATION_DN	GHANDHI_DIRECT_IRRADIATION_DN		12	0.39304224	0.91167116	0.58448756	0.94619983	1.0	2228	tags=50%, list=30%, signal=71%
TOMLINS_METASTASIS_DN	TOMLINS_METASTASIS_DN		10	0.40096098	0.91139174	0.5971223	0.94629556	1.0	3102	tags=70%, list=42%, signal=120%
LU_AGING_BRAIN_UP	LU_AGING_BRAIN_UP		196	0.25902203	0.91122633	0.701232	0.94612217	1.0	2120	tags=30%, list=29%, signal=40%
REACTOME_REGULATION_OF_SIGNALING_BY_CBL	REACTOME_REGULATION_OF_SIGNALING_BY_CBL		12	0.3918561	0.91043043	0.58171743	0.94747835	1.0	1275	tags=42%, list=17%, signal=50%
REACTOME_SCFSKP2_MEDIATED_DEGRADATION_OF_P27_P21	REACTOME_SCFSKP2_MEDIATED_DEGRADATION_OF_P27_P21		48	0.29877612	0.91031605	0.61104584	0.9471755	1.0	3490	tags=52%, list=47%, signal=97%
SHETH_LIVER_CANCER_VS_TXNIP_LOSS_PAM1	SHETH_LIVER_CANCER_VS_TXNIP_LOSS_PAM1		111	0.266822	0.9094254	0.67884	0.9487435	1.0	793	tags=14%, list=11%, signal=15%
GALLUZZI_PREVENT_MITOCHONDIAL_PERMEABILIZATION	GALLUZZI_PREVENT_MITOCHONDIAL_PERMEABILIZATION		18	0.35490614	0.9091373	0.5766129	0.94887406	1.0	1035	tags=11%, list=14%, signal=13%
BILANGES_RAPAMYCIN_SENSITIVE_GENES	BILANGES_RAPAMYCIN_SENSITIVE_GENES		25	0.33384612	0.9090828	0.5971686	0.948434	1.0	1621	tags=28%, list=22%, signal=36%
DAVIES_MULTIPLE_MYELOMA_VS_MGUS_UP	DAVIES_MULTIPLE_MYELOMA_VS_MGUS_UP		10	0.40794787	0.9084789	0.5954738	0.949315	1.0	1350	tags=40%, list=18%, signal=49%
PID_IL2_PI3KPATHWAY	PID_IL2_PI3KPATHWAY		23	0.33659244	0.9083901	0.5954488	0.9489665	1.0	2046	tags=39%, list=28%, signal=54%
MCCABE_BOUND_BY_HOXC6	MCCABE_BOUND_BY_HOXC6		155	0.25999743	0.90792763	0.68037975	0.94948757	1.0	1356	tags=20%, list=18%, signal=24%
PEDRIOLI_MIR31_TARGETS_UP	PEDRIOLI_MIR31_TARGETS_UP		64	0.28183076	0.9069581	0.63615817	0.95117545	1.0	488	tags=16%, list=7%, signal=17%
KEGG_MAPK_SIGNALING_PATHWAY	KEGG_MAPK_SIGNALING_PATHWAY		129	0.26487625	0.90673673	0.6755319	0.95116425	1.0	1606	tags=22%, list=22%, signal=28%
DACOSTA_UV_RESPONSE_VIA_ERCC3_COMMON_UP	DACOSTA_UV_RESPONSE_VIA_ERCC3_COMMON_UP		55	0.2897878	0.9065425	0.62020904	0.95105547	1.0	612	tags=13%, list=8%, signal=14%
WANG_CLIM2_TARGETS_DN	WANG_CLIM2_TARGETS_DN		105	0.26819912	0.9061574	0.66056037	0.9514184	1.0	2149	tags=30%, list=29%, signal=42%
SENESE_HDAC1_AND_HDAC2_TARGETS_DN	SENESE_HDAC1_AND_HDAC2_TARGETS_DN		118	0.26485538	0.9050794	0.6656118	0.9533568	1.0	963	tags=19%, list=13%, signal=21%
KEGG_MTOR_SIGNALING_PATHWAY	KEGG_MTOR_SIGNALING_PATHWAY		30	0.32226577	0.90501124	0.6253133	0.9529549	1.0	751	tags=17%, list=10%, signal=18%
KYNG_DNA_DAMAGE_BY_GAMMA_RADIATION	KYNG_DNA_DAMAGE_BY_GAMMA_RADIATION		45	0.3026228	0.90499014	0.62077016	0.9524412	1.0	642	tags=18%, list=9%, signal=19%
CHANG_IMMORTALIZED_BY_HPV31_DN	CHANG_IMMORTALIZED_BY_HPV31_DN		31	0.3135295	0.90478444	0.6176837	0.9523585	1.0	2432	tags=45%, list=33%, signal=67%
REACTOME_CLASS_A1_RHODOPSIN_LIKE_RECEPTORS	REACTOME_CLASS_A1_RHODOPSIN_LIKE_RECEPTORS		72	0.27825198	0.90426975	0.6388889	0.9529943	1.0	1483	tags=26%, list=20%, signal=33%
MIPS_TFIID_COMPLEX	MIPS_TFIID_COMPLEX		10	0.41298655	0.90416026	0.6111111	0.9526905	1.0	658	tags=20%, list=9%, signal=22%
LANDIS_ERBB2_BREAST_TUMORS_324_DN	LANDIS_ERBB2_BREAST_TUMORS_324_DN		104	0.26947513	0.90345716	0.6659506	0.9537087	1.0	2647	tags=38%, list=36%, signal=59%
BOQUEST_STEM_CELL_CULTURED_VS_FRESH_DN	BOQUEST_STEM_CELL_CULTURED_VS_FRESH_DN		23	0.33749348	0.9033275	0.60264903	0.9534445	1.0	587	tags=22%, list=8%, signal=24%
HU_GENOTOXIC_DAMAGE_24HR	HU_GENOTOXIC_DAMAGE_24HR		25	0.33185223	0.90312237	0.6170483	0.9533589	1.0	2687	tags=32%, list=36%, signal=50%
PID_IFNGPATHWAY	PID_IFNGPATHWAY		23	0.3391926	0.9029172	0.6230769	0.9532613	1.0	1900	tags=26%, list=26%, signal=35%
VALK_AML_CLUSTER_1	VALK_AML_CLUSTER_1		15	0.3700042	0.9026589	0.6239782	0.9532904	1.0	861	tags=33%, list=12%, signal=38%
LE_SKI_TARGETS_UP	LE_SKI_TARGETS_UP		12	0.38806963	0.9023031	0.6089386	0.9536078	1.0	516	tags=17%, list=7%, signal=18%
REACTOME_SIGNALING_BY_FGFR_IN_DISEASE	REACTOME_SIGNALING_BY_FGFR_IN_DISEASE		59	0.2861391	0.9015563	0.64646465	0.95474684	1.0	2285	tags=37%, list=31%, signal=53%
KEGG_ABC_TRANSPORTERS	KEGG_ABC_TRANSPORTERS		17	0.3556512	0.900891	0.6246649	0.95570755	1.0	1893	tags=35%, list=25%, signal=47%
YAO_TEMPORAL_RESPONSE_TO_PROGESTERONE_CLUSTER_2	YAO_TEMPORAL_RESPONSE_TO_PROGESTERONE_CLUSTER_2		46	0.2960723	0.9003653	0.635054	0.9563643	1.0	2680	tags=48%, list=36%, signal=74%
REACTOME_SIGNALING_BY_THE_B_CELL_RECEPTOR_BCR	REACTOME_SIGNALING_BY_THE_B_CELL_RECEPTOR_BCR		85	0.27553922	0.90017235	0.6590414	0.95625263	1.0	2326	tags=31%, list=31%, signal=44%
KARLSSON_TGFB1_TARGETS_DN	KARLSSON_TGFB1_TARGETS_DN		137	0.26209486	0.89973825	0.6955603	0.95671266	1.0	1574	tags=20%, list=21%, signal=25%
MILI_PSEUDOPODIA_HAPTOTAXIS_DN	MILI_PSEUDOPODIA_HAPTOTAXIS_DN		391	0.24586265	0.8991964	0.80140424	0.95740604	1.0	2101	tags=26%, list=28%, signal=34%
GERHOLD_ADIPOGENESIS_DN	GERHOLD_ADIPOGENESIS_DN		52	0.2906724	0.89918804	0.64444447	0.9568723	1.0	2507	tags=40%, list=34%, signal=60%
FRIDMAN_IMMORTALIZATION_DN	FRIDMAN_IMMORTALIZATION_DN		28	0.3259242	0.8990991	0.6169697	0.95650625	1.0	1285	tags=29%, list=17%, signal=34%
KEGG_MELANOGENESIS	KEGG_MELANOGENESIS		45	0.3019583	0.89835656	0.6196172	0.95765036	1.0	1319	tags=20%, list=18%, signal=24%
MIKKELSEN_MCV6_HCP_WITH_H3K27ME3	MIKKELSEN_MCV6_HCP_WITH_H3K27ME3		100	0.26739925	0.89772415	0.67653507	0.95853037	1.0	644	tags=17%, list=9%, signal=18%
KEGG_GLYCOLYSIS_GLUCONEOGENESIS	KEGG_GLYCOLYSIS_GLUCONEOGENESIS		37	0.3060061	0.89770406	0.63151515	0.9580253	1.0	1425	tags=16%, list=19%, signal=20%
YANG_BREAST_CANCER_ESR1_UP	YANG_BREAST_CANCER_ESR1_UP		22	0.33761656	0.89730895	0.60858256	0.95838296	1.0	793	tags=14%, list=11%, signal=15%
SUZUKI_RESPONSE_TO_TSA_AND_DECITABINE_1A	SUZUKI_RESPONSE_TO_TSA_AND_DECITABINE_1A		16	0.36045337	0.89718366	0.6313618	0.95809966	1.0	1219	tags=25%, list=16%, signal=30%
SATO_SILENCED_EPIGENETICALLY_IN_PANCREATIC_CANCER	SATO_SILENCED_EPIGENETICALLY_IN_PANCREATIC_CANCER		22	0.34268326	0.8961725	0.63090676	0.9598322	1.0	654	tags=18%, list=9%, signal=20%
REACTOME_REGULATION_OF_INSULIN_LIKE_GROWTH_FACTOR_IGF_ACTIVITY_BY_INSULIN_LIKE_GROWTH_FACTOR_BINDING_PROTEINS_IGFBPS	REACTOME_REGULATION_OF_INSULIN_LIKE_GROWTH_FACTOR_IGF_ACTIVITY_BY_INSULIN_LIKE_GROWTH_FACTOR_BINDING_PROTEINS_IGFBPS		12	0.3847915	0.8958688	0.6141844	0.9599877	1.0	263	tags=17%, list=4%, signal=17%
CHIARADONNA_NEOPLASTIC_TRANSFORMATION_KRAS_CDC25_DN	CHIARADONNA_NEOPLASTIC_TRANSFORMATION_KRAS_CDC25_DN		35	0.30955815	0.8956988	0.6328502	0.95983094	1.0	2359	tags=31%, list=32%, signal=46%
LABBE_TARGETS_OF_TGFB1_AND_WNT3A_DN	LABBE_TARGETS_OF_TGFB1_AND_WNT3A_DN		51	0.28664935	0.8955548	0.65325445	0.9596207	1.0	612	tags=10%, list=8%, signal=11%
KEGG_ACUTE_MYELOID_LEUKEMIA	KEGG_ACUTE_MYELOID_LEUKEMIA		37	0.30542132	0.8951804	0.6309379	0.9599119	1.0	832	tags=16%, list=11%, signal=18%
BIOCARTA_IL1R_PATHWAY	BIOCARTA_IL1R_PATHWAY		12	0.38439438	0.8946602	0.60610265	0.96054053	1.0	612	tags=25%, list=8%, signal=27%
BURTON_ADIPOGENESIS_7	BURTON_ADIPOGENESIS_7		42	0.30264843	0.8946449	0.64677805	0.96001786	1.0	2466	tags=31%, list=33%, signal=46%
HOFMANN_MYELODYSPLASTIC_SYNDROM_LOW_RISK_UP	HOFMANN_MYELODYSPLASTIC_SYNDROM_LOW_RISK_UP		10	0.4057903	0.8942843	0.6103352	0.9603134	1.0	1860	tags=50%, list=25%, signal=67%
AMUNDSON_DNA_DAMAGE_RESPONSE_TP53	AMUNDSON_DNA_DAMAGE_RESPONSE_TP53		10	0.40925163	0.89398974	0.62240666	0.96041477	1.0	2312	tags=70%, list=31%, signal=101%
KYNG_WERNER_SYNDROM_DN	KYNG_WERNER_SYNDROM_DN		16	0.3665592	0.8935545	0.6248349	0.9608114	1.0	2495	tags=50%, list=34%, signal=75%
MULLIGAN_NTF3_SIGNALING_VIA_INSR_AND_IGF1R_UP	MULLIGAN_NTF3_SIGNALING_VIA_INSR_AND_IGF1R_UP		14	0.3775903	0.8926382	0.63907737	0.9623722	1.0	2365	tags=43%, list=32%, signal=63%
FAELT_B_CLL_WITH_VH3_21_DN	FAELT_B_CLL_WITH_VH3_21_DN		43	0.29692662	0.8918759	0.6437055	0.9634706	1.0	2258	tags=33%, list=30%, signal=46%
BIOCARTA_IL2RB_PATHWAY	BIOCARTA_IL2RB_PATHWAY		26	0.3211552	0.89099455	0.6333333	0.96488136	1.0	2442	tags=42%, list=33%, signal=63%
BONCI_TARGETS_OF_MIR15A_AND_MIR16_1	BONCI_TARGETS_OF_MIR15A_AND_MIR16_1		48	0.29244253	0.8905456	0.645614	0.96537244	1.0	905	tags=17%, list=12%, signal=19%
RICKMAN_HEAD_AND_NECK_CANCER_B	RICKMAN_HEAD_AND_NECK_CANCER_B		23	0.33390528	0.890531	0.6191744	0.96485674	1.0	611	tags=22%, list=8%, signal=24%
KAAB_HEART_ATRIUM_VS_VENTRICLE_UP	KAAB_HEART_ATRIUM_VS_VENTRICLE_UP		173	0.25227955	0.89047474	0.7345041	0.9644254	1.0	1445	tags=23%, list=19%, signal=28%
MULLIGHAN_NPM1_SIGNATURE_3_DN	MULLIGHAN_NPM1_SIGNATURE_3_DN		112	0.26094976	0.89008623	0.6954644	0.96473247	1.0	2122	tags=32%, list=29%, signal=44%
KEGG_B_CELL_RECEPTOR_SIGNALING_PATHWAY	KEGG_B_CELL_RECEPTOR_SIGNALING_PATHWAY		45	0.29578292	0.88950616	0.6440281	0.96548027	1.0	2209	tags=33%, list=30%, signal=47%
SHETH_LIVER_CANCER_VS_TXNIP_LOSS_PAM2	SHETH_LIVER_CANCER_VS_TXNIP_LOSS_PAM2		83	0.27378607	0.8886865	0.68866885	0.9667224	1.0	311	tags=10%, list=4%, signal=10%
BIOCARTA_STRESS_PATHWAY	BIOCARTA_STRESS_PATHWAY		15	0.36671975	0.8883589	0.6340483	0.9669015	1.0	1696	tags=33%, list=23%, signal=43%
ACEVEDO_NORMAL_TISSUE_ADJACENT_TO_LIVER_TUMOR_UP	ACEVEDO_NORMAL_TISSUE_ADJACENT_TO_LIVER_TUMOR_UP		103	0.26377898	0.88835096	0.69635195	0.9663662	1.0	2088	tags=25%, list=28%, signal=35%
REACTOME_INTRINSIC_PATHWAY_FOR_APOPTOSIS	REACTOME_INTRINSIC_PATHWAY_FOR_APOPTOSIS		15	0.36770108	0.8883291	0.6356164	0.9658645	1.0	2285	tags=53%, list=31%, signal=77%
FLECHNER_PBL_KIDNEY_TRANSPLANT_OK_VS_DONOR_DN	FLECHNER_PBL_KIDNEY_TRANSPLANT_OK_VS_DONOR_DN		31	0.3116736	0.8881221	0.6525529	0.9657419	1.0	1822	tags=26%, list=24%, signal=34%
WANG_TNF_TARGETS	WANG_TNF_TARGETS		11	0.39584157	0.88785416	0.61354584	0.96577847	1.0	55	tags=9%, list=1%, signal=9%
NOUZOVA_TRETINOIN_AND_H4_ACETYLATION	NOUZOVA_TRETINOIN_AND_H4_ACETYLATION		70	0.27471992	0.88755953	0.68222225	0.9658793	1.0	1795	tags=30%, list=24%, signal=39%
HAHTOLA_CTCL_CUTANEOUS	HAHTOLA_CTCL_CUTANEOUS		21	0.34045887	0.88715327	0.6355263	0.9662316	1.0	303	tags=14%, list=4%, signal=15%
HEIDENBLAD_AMPLIFIED_IN_PANCREATIC_CANCER	HEIDENBLAD_AMPLIFIED_IN_PANCREATIC_CANCER		13	0.37543392	0.8863799	0.62581486	0.9673843	1.0	1101	tags=23%, list=15%, signal=27%
SHEPARD_CRUSH_AND_BURN_MUTANT_UP	SHEPARD_CRUSH_AND_BURN_MUTANT_UP		117	0.26157752	0.8861353	0.7245763	0.967378	1.0	2809	tags=43%, list=38%, signal=68%
WEIGEL_OXIDATIVE_STRESS_BY_HNE_AND_TBH	WEIGEL_OXIDATIVE_STRESS_BY_HNE_AND_TBH		42	0.2960427	0.8860554	0.6491018	0.96701866	1.0	2736	tags=45%, list=37%, signal=71%
MOOTHA_GLYCOGEN_METABOLISM	MOOTHA_GLYCOGEN_METABOLISM		13	0.3754872	0.8858163	0.6319444	0.9670035	1.0	3126	tags=46%, list=42%, signal=79%
REACTOME_COLLAGEN_FORMATION	REACTOME_COLLAGEN_FORMATION		30	0.31732103	0.8849641	0.6481242	0.9683389	1.0	1730	tags=33%, list=23%, signal=43%
MARSON_FOXP3_TARGETS_DN	MARSON_FOXP3_TARGETS_DN		31	0.30643222	0.8846825	0.63420725	0.9684129	1.0	1626	tags=26%, list=22%, signal=33%
KIM_HYPOXIA	KIM_HYPOXIA		19	0.34867832	0.8846183	0.63363755	0.96802145	1.0	384	tags=11%, list=5%, signal=11%
BIOCARTA_MYOSIN_PATHWAY	BIOCARTA_MYOSIN_PATHWAY		20	0.34197694	0.88443077	0.62582344	0.9679056	1.0	1542	tags=35%, list=21%, signal=44%
ZHAN_LATE_DIFFERENTIATION_GENES_DN	ZHAN_LATE_DIFFERENTIATION_GENES_DN		11	0.39869225	0.8843396	0.65007114	0.9675715	1.0	1205	tags=36%, list=16%, signal=43%
TOOKER_GEMCITABINE_RESISTANCE_UP	TOOKER_GEMCITABINE_RESISTANCE_UP		66	0.27401513	0.8816868	0.6908267	0.97282696	1.0	883	tags=17%, list=12%, signal=19%
KEGG_GLYCINE_SERINE_AND_THREONINE_METABOLISM	KEGG_GLYCINE_SERINE_AND_THREONINE_METABOLISM		16	0.3574592	0.8816501	0.61360544	0.9723507	1.0	571	tags=19%, list=8%, signal=20%
BIOCARTA_TOLL_PATHWAY	BIOCARTA_TOLL_PATHWAY		16	0.3541626	0.88135004	0.6423752	0.97246337	1.0	710	tags=25%, list=10%, signal=28%
STAMBOLSKY_TARGETS_OF_MUTATED_TP53_UP	STAMBOLSKY_TARGETS_OF_MUTATED_TP53_UP		21	0.3371221	0.8810421	0.6348387	0.97254723	1.0	2467	tags=52%, list=33%, signal=78%
LIN_MELANOMA_COPY_NUMBER_DN	LIN_MELANOMA_COPY_NUMBER_DN		30	0.31444535	0.88075495	0.65721333	0.97261965	1.0	2923	tags=43%, list=39%, signal=71%
REACTOME_G_ALPHA1213_SIGNALLING_EVENTS	REACTOME_G_ALPHA1213_SIGNALLING_EVENTS		43	0.29530197	0.8806699	0.65621233	0.97225416	1.0	1542	tags=21%, list=21%, signal=26%
CAIRO_LIVER_DEVELOPMENT_DN	CAIRO_LIVER_DEVELOPMENT_DN		137	0.2562523	0.88066363	0.7294737	0.9717247	1.0	1473	tags=18%, list=20%, signal=22%
SWEET_KRAS_TARGETS_DN	SWEET_KRAS_TARGETS_DN		40	0.29563242	0.8801776	0.6766827	0.9722139	1.0	1105	tags=23%, list=15%, signal=26%
KUNINGER_IGF1_VS_PDGFB_TARGETS_UP	KUNINGER_IGF1_VS_PDGFB_TARGETS_UP		24	0.32457703	0.8801674	0.65903306	0.9716848	1.0	1285	tags=25%, list=17%, signal=30%
ALCALAY_AML_BY_NPM1_LOCALIZATION_UP	ALCALAY_AML_BY_NPM1_LOCALIZATION_UP		85	0.266697	0.8800808	0.70167595	0.97131926	1.0	2346	tags=35%, list=32%, signal=51%
DER_IFN_BETA_RESPONSE_UP	DER_IFN_BETA_RESPONSE_UP		76	0.27205667	0.87979764	0.6896942	0.9713959	1.0	2623	tags=42%, list=35%, signal=64%
REACTOME_PI3K_EVENTS_IN_ERBB2_SIGNALING	REACTOME_PI3K_EVENTS_IN_ERBB2_SIGNALING		21	0.33867386	0.87927175	0.66059816	0.97198975	1.0	2285	tags=43%, list=31%, signal=62%
ACEVEDO_NORMAL_TISSUE_ADJACENT_TO_LIVER_TUMOR_DN	ACEVEDO_NORMAL_TISSUE_ADJACENT_TO_LIVER_TUMOR_DN		210	0.24732196	0.87911034	0.7512794	0.9717762	1.0	2274	tags=26%, list=31%, signal=37%
SMIRNOV_RESPONSE_TO_IR_2HR_UP	SMIRNOV_RESPONSE_TO_IR_2HR_UP		35	0.3020153	0.8788797	0.67146283	0.97172093	1.0	1590	tags=31%, list=21%, signal=40%
WANG_IMMORTALIZED_BY_HOXA9_AND_MEIS1_DN	WANG_IMMORTALIZED_BY_HOXA9_AND_MEIS1_DN		13	0.37362906	0.8788387	0.6528705	0.97126675	1.0	1933	tags=31%, list=26%, signal=42%
GEORGANTAS_HSC_MARKERS	GEORGANTAS_HSC_MARKERS		46	0.29433045	0.87868845	0.68159807	0.9710461	1.0	716	tags=13%, list=10%, signal=14%
REACTOME_GPVI_MEDIATED_ACTIVATION_CASCADE	REACTOME_GPVI_MEDIATED_ACTIVATION_CASCADE		20	0.34237668	0.8786745	0.6343949	0.9705363	1.0	1275	tags=30%, list=17%, signal=36%
PELLICCIOTTA_HDAC_IN_ANTIGEN_PRESENTATION_DN	PELLICCIOTTA_HDAC_IN_ANTIGEN_PRESENTATION_DN		40	0.29527608	0.8785955	0.6639344	0.97016394	1.0	3770	tags=60%, list=51%, signal=121%
BOGNI_TREATMENT_RELATED_MYELOID_LEUKEMIA_UP	BOGNI_TREATMENT_RELATED_MYELOID_LEUKEMIA_UP		16	0.35797405	0.87740594	0.6536913	0.972126	1.0	721	tags=25%, list=10%, signal=28%
REACTOME_CDT1_ASSOCIATION_WITH_THE_CDC6_ORC_ORIGIN_COMPLEX	REACTOME_CDT1_ASSOCIATION_WITH_THE_CDC6_ORC_ORIGIN_COMPLEX		43	0.29026115	0.87734395	0.65361077	0.9717221	1.0	3490	tags=53%, list=47%, signal=100%
KIM_ALL_DISORDERS_OLIGODENDROCYTE_NUMBER_CORR_DN	KIM_ALL_DISORDERS_OLIGODENDROCYTE_NUMBER_CORR_DN		12	0.3767023	0.87696165	0.63812155	0.971993	1.0	981	tags=25%, list=13%, signal=29%
KYNG_DNA_DAMAGE_BY_4NQO_OR_UV	KYNG_DNA_DAMAGE_BY_4NQO_OR_UV		46	0.2965354	0.8767218	0.68122786	0.9719647	1.0	556	tags=15%, list=7%, signal=16%
VANTVEER_BREAST_CANCER_BRCA1_DN	VANTVEER_BREAST_CANCER_BRCA1_DN		25	0.32244858	0.8766477	0.6465409	0.9715947	1.0	1478	tags=24%, list=20%, signal=30%
GENTLES_LEUKEMIC_STEM_CELL_UP	GENTLES_LEUKEMIC_STEM_CELL_UP		15	0.35430038	0.87623984	0.63350785	0.97191757	1.0	1276	tags=27%, list=17%, signal=32%
SASSON_RESPONSE_TO_FORSKOLIN_DN	SASSON_RESPONSE_TO_FORSKOLIN_DN		70	0.26934686	0.87597036	0.6783692	0.971943	1.0	2638	tags=39%, list=35%, signal=59%
GAZDA_DIAMOND_BLACKFAN_ANEMIA_MYELOID_DN	GAZDA_DIAMOND_BLACKFAN_ANEMIA_MYELOID_DN		31	0.31025377	0.8758716	0.67235076	0.97160524	1.0	2177	tags=32%, list=29%, signal=45%
ZEMBUTSU_SENSITIVITY_TO_VINBLASTINE	ZEMBUTSU_SENSITIVITY_TO_VINBLASTINE		12	0.3815117	0.8753661	0.619891	0.97212064	1.0	84	tags=8%, list=1%, signal=8%
ROSS_AML_WITH_PML_RARA_FUSION	ROSS_AML_WITH_PML_RARA_FUSION		48	0.2882724	0.875035	0.6658851	0.97230744	1.0	1465	tags=23%, list=20%, signal=28%
LINDVALL_IMMORTALIZED_BY_TERT_UP	LINDVALL_IMMORTALIZED_BY_TERT_UP		48	0.28712264	0.87427527	0.67772514	0.97331583	1.0	1568	tags=25%, list=21%, signal=31%
OUELLET_CULTURED_OVARIAN_CANCER_INVASIVE_VS_LMP_DN	OUELLET_CULTURED_OVARIAN_CANCER_INVASIVE_VS_LMP_DN		20	0.33492127	0.8734448	0.6580311	0.9745568	1.0	574	tags=15%, list=8%, signal=16%
KEGG_PROTEIN_EXPORT	KEGG_PROTEIN_EXPORT		16	0.34670177	0.87315863	0.64846873	0.9746267	1.0	3164	tags=50%, list=43%, signal=87%
WESTON_VEGFA_TARGETS_3HR	WESTON_VEGFA_TARGETS_3HR		48	0.2891522	0.8729932	0.65398335	0.9744433	1.0	2403	tags=42%, list=32%, signal=61%
GUILLAUMOND_KLF10_TARGETS_UP	GUILLAUMOND_KLF10_TARGETS_UP		28	0.31053224	0.8728718	0.6535032	0.9741549	1.0	1374	tags=25%, list=18%, signal=31%
PID_AR_TF_PATHWAY	PID_AR_TF_PATHWAY		33	0.3064877	0.8726986	0.6695438	0.9739545	1.0	1578	tags=27%, list=21%, signal=34%
BOGNI_TREATMENT_RELATED_MYELOID_LEUKEMIA_DN	BOGNI_TREATMENT_RELATED_MYELOID_LEUKEMIA_DN		25	0.31854466	0.87243235	0.6683871	0.9739819	1.0	3301	tags=64%, list=44%, signal=115%
FOSTER_TOLERANT_MACROPHAGE_DN	FOSTER_TOLERANT_MACROPHAGE_DN		194	0.2445652	0.8722636	0.7712215	0.9738017	1.0	1178	tags=18%, list=16%, signal=21%
BIOCARTA_CASPASE_PATHWAY	BIOCARTA_CASPASE_PATHWAY		10	0.39174142	0.87219733	0.63736266	0.9733996	1.0	1585	tags=40%, list=21%, signal=51%
LUI_THYROID_CANCER_PAX8_PPARG_UP	LUI_THYROID_CANCER_PAX8_PPARG_UP		38	0.29860786	0.87215686	0.6587958	0.9729461	1.0	2470	tags=42%, list=33%, signal=63%
BRACHAT_RESPONSE_TO_CAMPTOTHECIN_UP	BRACHAT_RESPONSE_TO_CAMPTOTHECIN_UP		16	0.34737363	0.8719963	0.6520548	0.9727493	1.0	2353	tags=31%, list=32%, signal=46%
PID_RAC1_PATHWAY	PID_RAC1_PATHWAY		29	0.31316212	0.8718747	0.6722365	0.9724665	1.0	2277	tags=31%, list=31%, signal=45%
MIPS_RNA_POLYMERASE_II	MIPS_RNA_POLYMERASE_II		13	0.3691503	0.8718577	0.6278755	0.9719712	1.0	3428	tags=69%, list=46%, signal=128%
MOOTHA_PGC	MOOTHA_PGC		330	0.24055824	0.87109363	0.82965934	0.973059	1.0	2125	tags=25%, list=29%, signal=34%
LOPES_METHYLATED_IN_COLON_CANCER_DN	LOPES_METHYLATED_IN_COLON_CANCER_DN		18	0.34162077	0.87086385	0.64524764	0.9730175	1.0	557	tags=17%, list=7%, signal=18%
REACTOME_ADHERENS_JUNCTIONS_INTERACTIONS	REACTOME_ADHERENS_JUNCTIONS_INTERACTIONS		13	0.36380637	0.8706621	0.6431479	0.972903	1.0	516	tags=15%, list=7%, signal=17%
LEE_INTRATHYMIC_T_PROGENITOR	LEE_INTRATHYMIC_T_PROGENITOR		11	0.38547653	0.8702649	0.647868	0.9732131	1.0	545	tags=18%, list=7%, signal=20%
KANNAN_TP53_TARGETS_UP	KANNAN_TP53_TARGETS_UP		43	0.28942353	0.86980754	0.6887574	0.973617	1.0	957	tags=19%, list=13%, signal=21%
LA_MEN1_TARGETS	LA_MEN1_TARGETS		12	0.37342867	0.8695545	0.6509299	0.97360736	1.0	620	tags=25%, list=8%, signal=27%
REACTOME_SIGNALING_BY_INSULIN_RECEPTOR	REACTOME_SIGNALING_BY_INSULIN_RECEPTOR		56	0.28071102	0.86919767	0.6786543	0.97382724	1.0	1228	tags=16%, list=17%, signal=19%
YAO_TEMPORAL_RESPONSE_TO_PROGESTERONE_CLUSTER_12	YAO_TEMPORAL_RESPONSE_TO_PROGESTERONE_CLUSTER_12		58	0.27517393	0.8687938	0.69611305	0.9741561	1.0	2301	tags=33%, list=31%, signal=47%
REACTOME_P53_INDEPENDENT_G1_S_DNA_DAMAGE_CHECKPOINT	REACTOME_P53_INDEPENDENT_G1_S_DNA_DAMAGE_CHECKPOINT		44	0.29133737	0.86845213	0.6819788	0.9743437	1.0	3490	tags=55%, list=47%, signal=102%
DARWICHE_SKIN_TUMOR_PROMOTER_DN	DARWICHE_SKIN_TUMOR_PROMOTER_DN		86	0.2629392	0.8683401	0.7007701	0.9740473	1.0	1394	tags=17%, list=19%, signal=21%
BROWNE_HCMV_INFECTION_48HR_DN	BROWNE_HCMV_INFECTION_48HR_DN		301	0.24017966	0.867592	0.8159757	0.9750446	1.0	2026	tags=27%, list=27%, signal=36%
SAFFORD_T_LYMPHOCYTE_ANERGY	SAFFORD_T_LYMPHOCYTE_ANERGY		42	0.28838375	0.8667502	0.6811071	0.97626245	1.0	1415	tags=24%, list=19%, signal=29%
GENTILE_UV_HIGH_DOSE_UP	GENTILE_UV_HIGH_DOSE_UP		13	0.36792755	0.866722	0.63760215	0.975786	1.0	724	tags=23%, list=10%, signal=26%
KEGG_NATURAL_KILLER_CELL_MEDIATED_CYTOTOXICITY	KEGG_NATURAL_KILLER_CELL_MEDIATED_CYTOTOXICITY		52	0.27736256	0.86642283	0.6770473	0.9758621	1.0	1954	tags=33%, list=26%, signal=44%
REACTOME_ACTIVATION_OF_CHAPERONE_GENES_BY_XBP1S	REACTOME_ACTIVATION_OF_CHAPERONE_GENES_BY_XBP1S		35	0.30135915	0.8663027	0.67153287	0.9755685	1.0	1921	tags=31%, list=26%, signal=42%
SCIBETTA_KDM5B_TARGETS_UP	SCIBETTA_KDM5B_TARGETS_UP		16	0.3506633	0.86609936	0.65349144	0.9754445	1.0	1274	tags=19%, list=17%, signal=23%
RASHI_RESPONSE_TO_IONIZING_RADIATION_6	RASHI_RESPONSE_TO_IONIZING_RADIATION_6		43	0.28746757	0.8656127	0.6912669	0.9759157	1.0	1871	tags=30%, list=25%, signal=40%
PID_HIF1_TFPATHWAY	PID_HIF1_TFPATHWAY		45	0.28876415	0.86556387	0.68516284	0.9754805	1.0	717	tags=16%, list=10%, signal=17%
FIGUEROA_AML_METHYLATION_CLUSTER_7_UP	FIGUEROA_AML_METHYLATION_CLUSTER_7_UP		55	0.27847713	0.8651998	0.6828143	0.97570693	1.0	2127	tags=33%, list=29%, signal=45%
LUI_THYROID_CANCER_PAX8_PPARG_DN	LUI_THYROID_CANCER_PAX8_PPARG_DN		37	0.30216816	0.8647485	0.6845966	0.97608685	1.0	2082	tags=24%, list=28%, signal=34%
BONOME_OVARIAN_CANCER_SURVIVAL_OPTIMAL_DEBULKING	BONOME_OVARIAN_CANCER_SURVIVAL_OPTIMAL_DEBULKING		137	0.2515684	0.8645365	0.7542373	0.9760137	1.0	2292	tags=38%, list=31%, signal=54%
HOQUE_METHYLATED_IN_CANCER	HOQUE_METHYLATED_IN_CANCER		34	0.3005883	0.86416835	0.67527676	0.97624403	1.0	2401	tags=38%, list=32%, signal=56%
HOSHIDA_LIVER_CANCER_LATE_RECURRENCE_UP	HOSHIDA_LIVER_CANCER_LATE_RECURRENCE_UP		40	0.29186004	0.8641192	0.68529767	0.9758089	1.0	1609	tags=33%, list=22%, signal=41%
REACTOME_L1CAM_INTERACTIONS	REACTOME_L1CAM_INTERACTIONS		57	0.27597204	0.8640006	0.71049595	0.9755175	1.0	1403	tags=18%, list=19%, signal=21%
BIOCARTA_TNFR2_PATHWAY	BIOCARTA_TNFR2_PATHWAY		12	0.37755132	0.8638671	0.6327373	0.9752869	1.0	612	tags=17%, list=8%, signal=18%
BIDUS_METASTASIS_DN	BIDUS_METASTASIS_DN		87	0.26269993	0.863411	0.7290533	0.9756761	1.0	1182	tags=23%, list=16%, signal=27%
MARZEC_IL2_SIGNALING_UP	MARZEC_IL2_SIGNALING_UP		64	0.27366468	0.86330724	0.7125141	0.97535956	1.0	609	tags=14%, list=8%, signal=15%
BIOCARTA_SPPA_PATHWAY	BIOCARTA_SPPA_PATHWAY		14	0.3672497	0.86252415	0.6531165	0.9764959	1.0	1319	tags=21%, list=18%, signal=26%
ASTON_MAJOR_DEPRESSIVE_DISORDER_UP	ASTON_MAJOR_DEPRESSIVE_DISORDER_UP		36	0.29472977	0.86218464	0.69328266	0.97667503	1.0	2521	tags=42%, list=34%, signal=63%
ST_B_CELL_ANTIGEN_RECEPTOR	ST_B_CELL_ANTIGEN_RECEPTOR		22	0.32722774	0.86126506	0.6670968	0.97800124	1.0	2285	tags=36%, list=31%, signal=52%
MIPS_DGCR8_MULTIPROTEIN_COMPLEX	MIPS_DGCR8_MULTIPROTEIN_COMPLEX		11	0.38285714	0.86030763	0.6523546	0.9794275	1.0	2064	tags=36%, list=28%, signal=50%
KEGG_ADIPOCYTOKINE_SIGNALING_PATHWAY	KEGG_ADIPOCYTOKINE_SIGNALING_PATHWAY		33	0.3033178	0.8601969	0.6868812	0.9791093	1.0	612	tags=12%, list=8%, signal=13%
POMEROY_MEDULLOBLASTOMA_DESMOPLASIC_VS_CLASSIC_UP	POMEROY_MEDULLOBLASTOMA_DESMOPLASIC_VS_CLASSIC_UP		37	0.2958355	0.86006147	0.70230865	0.97885495	1.0	980	tags=14%, list=13%, signal=15%
CHOI_ATL_CHRONIC_VS_ACUTE_DN	CHOI_ATL_CHRONIC_VS_ACUTE_DN		17	0.33771655	0.85965836	0.6712707	0.9791361	1.0	2618	tags=29%, list=35%, signal=45%
BIOCARTA_PTEN_PATHWAY	BIOCARTA_PTEN_PATHWAY		13	0.35819012	0.8596177	0.66574585	0.9786889	1.0	1922	tags=31%, list=26%, signal=41%
BIOCARTA_ERK_PATHWAY	BIOCARTA_ERK_PATHWAY		25	0.3157358	0.85961115	0.67553866	0.97817093	1.0	2087	tags=36%, list=28%, signal=50%
BIOCARTA_AGR_PATHWAY	BIOCARTA_AGR_PATHWAY		18	0.34427127	0.859291	0.6807692	0.97828233	1.0	1257	tags=28%, list=17%, signal=33%
REACTOME_DOWNREGULATION_OF_TGF_BETA_RECEPTOR_SIGNALING	REACTOME_DOWNREGULATION_OF_TGF_BETA_RECEPTOR_SIGNALING		14	0.36552685	0.85917974	0.6738545	0.97797585	1.0	3068	tags=50%, list=41%, signal=85%
BIOCARTA_RARRXR_PATHWAY	BIOCARTA_RARRXR_PATHWAY		12	0.3752637	0.8587363	0.6746143	0.9783067	1.0	1759	tags=33%, list=24%, signal=44%
REACTOME_GRB2_EVENTS_IN_ERBB2_SIGNALING	REACTOME_GRB2_EVENTS_IN_ERBB2_SIGNALING		12	0.37352377	0.8586656	0.6872428	0.9779117	1.0	1189	tags=25%, list=16%, signal=30%
WANG_METASTASIS_OF_BREAST_CANCER_ESR1_DN	WANG_METASTASIS_OF_BREAST_CANCER_ESR1_DN		18	0.33735383	0.8585524	0.6592398	0.9775912	1.0	1489	tags=28%, list=20%, signal=35%
BIOCARTA_CALCINEURIN_PATHWAY	BIOCARTA_CALCINEURIN_PATHWAY		11	0.37650457	0.857863	0.6239193	0.97847176	1.0	2570	tags=55%, list=35%, signal=83%
BROWNE_HCMV_INFECTION_20HR_UP	BROWNE_HCMV_INFECTION_20HR_UP		139	0.25060228	0.8577547	0.76514345	0.97815037	1.0	1900	tags=28%, list=26%, signal=37%
WONG_MITOCHONDRIA_GENE_MODULE	WONG_MITOCHONDRIA_GENE_MODULE		173	0.24404041	0.8572564	0.7910136	0.9786109	1.0	3277	tags=39%, list=44%, signal=68%
NAKAMURA_METASTASIS	NAKAMURA_METASTASIS		25	0.32133645	0.85682446	0.6957638	0.9789322	1.0	323	tags=8%, list=4%, signal=8%
REACTOME_UNFOLDED_PROTEIN_RESPONSE	REACTOME_UNFOLDED_PROTEIN_RESPONSE		60	0.27374634	0.85679173	0.71885717	0.9784661	1.0	1710	tags=28%, list=23%, signal=36%
NIELSEN_LEIOMYOSARCOMA_CNN1_DN	NIELSEN_LEIOMYOSARCOMA_CNN1_DN		15	0.35824275	0.8567828	0.68767506	0.9779557	1.0	848	tags=27%, list=11%, signal=30%
UDAYAKUMAR_MED1_TARGETS_DN	UDAYAKUMAR_MED1_TARGETS_DN		180	0.24286345	0.8566645	0.77154726	0.97766024	1.0	1853	tags=27%, list=25%, signal=35%
SESTO_RESPONSE_TO_UV_C2	SESTO_RESPONSE_TO_UV_C2		40	0.29152468	0.8564058	0.68765134	0.9776578	1.0	2364	tags=40%, list=32%, signal=58%
RODRIGUES_DCC_TARGETS_DN	RODRIGUES_DCC_TARGETS_DN		73	0.26434854	0.85471815	0.7288136	0.98054737	1.0	2263	tags=38%, list=30%, signal=55%
SUNG_METASTASIS_STROMA_UP	SUNG_METASTASIS_STROMA_UP		75	0.2625847	0.85429674	0.7111111	0.98086274	1.0	1573	tags=25%, list=21%, signal=32%
LEE_LIVER_CANCER_MYC_TGFA_UP	LEE_LIVER_CANCER_MYC_TGFA_UP		41	0.28298253	0.85429555	0.6984127	0.9803376	1.0	132	tags=7%, list=2%, signal=7%
FLECHNER_BIOPSY_KIDNEY_TRANSPLANT_OK_VS_DONOR_UP	FLECHNER_BIOPSY_KIDNEY_TRANSPLANT_OK_VS_DONOR_UP		463	0.2316127	0.85396326	0.8997996	0.9804784	1.0	2570	tags=32%, list=35%, signal=46%
GU_PDEF_TARGETS_DN	GU_PDEF_TARGETS_DN		20	0.3316522	0.8531694	0.68906456	0.9815268	1.0	581	tags=20%, list=8%, signal=22%
BIOCARTA_DEATH_PATHWAY	BIOCARTA_DEATH_PATHWAY		18	0.32540342	0.8522712	0.6802097	0.9827688	1.0	1696	tags=28%, list=23%, signal=36%
RASHI_RESPONSE_TO_IONIZING_RADIATION_3	RASHI_RESPONSE_TO_IONIZING_RADIATION_3		31	0.30358186	0.8520866	0.69764704	0.9826133	1.0	2205	tags=35%, list=30%, signal=50%
WANG_RESPONSE_TO_ANDROGEN_UP	WANG_RESPONSE_TO_ANDROGEN_UP		15	0.3538831	0.85194886	0.67876345	0.9823628	1.0	104	tags=7%, list=1%, signal=7%
SWEET_LUNG_CANCER_KRAS_DN	SWEET_LUNG_CANCER_KRAS_DN		265	0.23571251	0.8518013	0.8422649	0.9821091	1.0	1595	tags=22%, list=21%, signal=27%
ABDELMOHSEN_ELAVL4_TARGETS	ABDELMOHSEN_ELAVL4_TARGETS		13	0.36232704	0.8513413	0.648227	0.9824685	1.0	1585	tags=38%, list=21%, signal=49%
PID_ERBB1_RECEPTOR_PROXIMAL_PATHWAY	PID_ERBB1_RECEPTOR_PROXIMAL_PATHWAY		28	0.30843067	0.8509459	0.68101263	0.9827251	1.0	2122	tags=36%, list=29%, signal=50%
BOSCO_EPITHELIAL_DIFFERENTIATION_MODULE	BOSCO_EPITHELIAL_DIFFERENTIATION_MODULE		16	0.34183025	0.850889	0.6706349	0.98230475	1.0	581	tags=19%, list=8%, signal=20%
KESHELAVA_MULTIPLE_DRUG_RESISTANCE	KESHELAVA_MULTIPLE_DRUG_RESISTANCE		56	0.2723819	0.85073584	0.7441038	0.9820758	1.0	1121	tags=20%, list=15%, signal=23%
PILON_KLF1_TARGETS_UP	PILON_KLF1_TARGETS_UP		277	0.2350473	0.850661	0.83047426	0.981709	1.0	1158	tags=16%, list=16%, signal=18%
WEIGEL_OXIDATIVE_STRESS_RESPONSE	WEIGEL_OXIDATIVE_STRESS_RESPONSE		27	0.3061192	0.85049504	0.67341775	0.9815024	1.0	186	tags=11%, list=3%, signal=11%
RODRIGUES_THYROID_CARCINOMA_POORLY_DIFFERENTIATED_DN	RODRIGUES_THYROID_CARCINOMA_POORLY_DIFFERENTIATED_DN		404	0.23225944	0.8496191	0.8678679	0.9826654	1.0	2747	tags=40%, list=37%, signal=60%
NIKOLSKY_BREAST_CANCER_6P24_P22_AMPLICON	NIKOLSKY_BREAST_CANCER_6P24_P22_AMPLICON		12	0.36920607	0.8492575	0.6981402	0.9828467	1.0	1848	tags=42%, list=25%, signal=55%
SASSON_RESPONSE_TO_GONADOTROPHINS_DN	SASSON_RESPONSE_TO_GONADOTROPHINS_DN		67	0.26580378	0.8492009	0.73370785	0.98242795	1.0	2638	tags=40%, list=35%, signal=62%
HERNANDEZ_ABERRANT_MITOSIS_BY_DOCETACEL_4NM_UP	HERNANDEZ_ABERRANT_MITOSIS_BY_DOCETACEL_4NM_UP		12	0.3694223	0.84894854	0.67238915	0.98239255	1.0	1370	tags=42%, list=18%, signal=51%
SEIDEN_ONCOGENESIS_BY_MET	SEIDEN_ONCOGENESIS_BY_MET		69	0.2624673	0.84892774	0.74178934	0.981915	1.0	3080	tags=42%, list=41%, signal=71%
WANG_SMARCE1_TARGETS_UP	WANG_SMARCE1_TARGETS_UP		128	0.24714364	0.8485961	0.75949365	0.9820424	1.0	1482	tags=22%, list=20%, signal=27%
AKL_HTLV1_INFECTION_UP	AKL_HTLV1_INFECTION_UP		24	0.31236872	0.8481554	0.68560606	0.98237526	1.0	973	tags=21%, list=13%, signal=24%
PEREZ_TP63_TARGETS	PEREZ_TP63_TARGETS		146	0.24495904	0.84814215	0.79790574	0.98187935	1.0	1409	tags=23%, list=19%, signal=27%
REACTOME_SIGNALLING_BY_NGF	REACTOME_SIGNALLING_BY_NGF		133	0.24602471	0.8476306	0.78797466	0.98234785	1.0	2146	tags=30%, list=29%, signal=42%
ZEMBUTSU_SENSITIVITY_TO_FLUOROURACIL	ZEMBUTSU_SENSITIVITY_TO_FLUOROURACIL		11	0.3747449	0.8474559	0.7144847	0.9821799	1.0	2046	tags=36%, list=28%, signal=50%
LIU_NASOPHARYNGEAL_CARCINOMA	LIU_NASOPHARYNGEAL_CARCINOMA		55	0.27434844	0.84691143	0.7190367	0.982724	1.0	2901	tags=47%, list=39%, signal=77%
ONO_AML1_TARGETS_UP	ONO_AML1_TARGETS_UP		10	0.38662085	0.84679383	0.68487394	0.98240626	1.0	1264	tags=30%, list=17%, signal=36%
REACTOME_G_BETA_GAMMA_SIGNALLING_THROUGH_PLC_BETA	REACTOME_G_BETA_GAMMA_SIGNALLING_THROUGH_PLC_BETA		12	0.36350438	0.84638244	0.6856369	0.9826786	1.0	247	tags=8%, list=3%, signal=9%
WINTER_HYPOXIA_DN	WINTER_HYPOXIA_DN		29	0.3024055	0.8460732	0.6813602	0.9827536	1.0	1663	tags=31%, list=22%, signal=40%
LIANG_SILENCED_BY_METHYLATION_UP	LIANG_SILENCED_BY_METHYLATION_UP		16	0.34737554	0.84577876	0.6931507	0.98282576	1.0	611	tags=19%, list=8%, signal=20%
KLEIN_PRIMARY_EFFUSION_LYMPHOMA_UP	KLEIN_PRIMARY_EFFUSION_LYMPHOMA_UP		31	0.30274642	0.84565	0.69315404	0.98256624	1.0	698	tags=13%, list=9%, signal=14%
ROZANOV_MMP14_TARGETS_SUBSET	ROZANOV_MMP14_TARGETS_SUBSET		22	0.3196003	0.84510946	0.66883117	0.9831116	1.0	1428	tags=23%, list=19%, signal=28%
SCHLINGEMANN_SKIN_CARCINOGENESIS_TPA_DN	SCHLINGEMANN_SKIN_CARCINOGENESIS_TPA_DN		20	0.32220677	0.84471893	0.7050453	0.98334736	1.0	804	tags=20%, list=11%, signal=22%
PID_BETACATENIN_NUC_PATHWAY	PID_BETACATENIN_NUC_PATHWAY		47	0.2793869	0.8445154	0.7190476	0.9832126	1.0	2551	tags=47%, list=34%, signal=71%
PID_IL23PATHWAY	PID_IL23PATHWAY		10	0.38582304	0.8443919	0.68616265	0.9829301	1.0	1686	tags=40%, list=23%, signal=52%
EBAUER_TARGETS_OF_PAX3_FOXO1_FUSION_DN	EBAUER_TARGETS_OF_PAX3_FOXO1_FUSION_DN		30	0.30319694	0.8435713	0.70328283	0.9839487	1.0	1254	tags=23%, list=17%, signal=28%
WANG_HCP_PROSTATE_CANCER	WANG_HCP_PROSTATE_CANCER		84	0.2549025	0.8434593	0.75923854	0.98365384	1.0	2075	tags=35%, list=28%, signal=47%
REACTOME_ACTIVATION_OF_GENES_BY_ATF4	REACTOME_ACTIVATION_OF_GENES_BY_ATF4		20	0.32550654	0.84288657	0.6962677	0.984228	1.0	1630	tags=35%, list=22%, signal=45%
KEGG_FRUCTOSE_AND_MANNOSE_METABOLISM	KEGG_FRUCTOSE_AND_MANNOSE_METABOLISM		23	0.31737927	0.8426144	0.70298314	0.98423994	1.0	1333	tags=17%, list=18%, signal=21%
ACEVEDO_METHYLATED_IN_LIVER_CANCER_DN	ACEVEDO_METHYLATED_IN_LIVER_CANCER_DN		219	0.23547836	0.84245557	0.83196723	0.9840248	1.0	1300	tags=16%, list=17%, signal=19%
SANA_TNF_SIGNALING_DN	SANA_TNF_SIGNALING_DN		53	0.26769978	0.84216696	0.71664697	0.98409814	1.0	940	tags=19%, list=13%, signal=21%
PID_NFKAPPABCANONICALPATHWAY	PID_NFKAPPABCANONICALPATHWAY		15	0.3439625	0.8415395	0.69473684	0.9847541	1.0	2292	tags=47%, list=31%, signal=67%
BRUINS_UVC_RESPONSE_VIA_TP53_GROUP_D	BRUINS_UVC_RESPONSE_VIA_TP53_GROUP_D		112	0.24780536	0.8408472	0.78435516	0.9855407	1.0	1948	tags=26%, list=26%, signal=35%
RODRIGUES_NTN1_TARGETS_DN	RODRIGUES_NTN1_TARGETS_DN		83	0.25603312	0.84079766	0.7687151	0.985128	1.0	1262	tags=18%, list=17%, signal=22%
LIANG_HEMATOPOIESIS_STEM_CELL_NUMBER_QTL	LIANG_HEMATOPOIESIS_STEM_CELL_NUMBER_QTL		10	0.38482538	0.8406769	0.69262296	0.9848457	1.0	99	tags=10%, list=1%, signal=10%
CAMPS_COLON_CANCER_COPY_NUMBER_UP	CAMPS_COLON_CANCER_COPY_NUMBER_UP		29	0.30169362	0.83989763	0.7358491	0.9858342	1.0	2695	tags=41%, list=36%, signal=65%
ISSAEVA_MLL2_TARGETS	ISSAEVA_MLL2_TARGETS		39	0.285457	0.8391332	0.727491	0.9867647	1.0	1339	tags=23%, list=18%, signal=28%
COLLIS_PRKDC_SUBSTRATES	COLLIS_PRKDC_SUBSTRATES		15	0.34711862	0.8390238	0.70556307	0.9864556	1.0	2474	tags=47%, list=33%, signal=70%
PARK_HSC_MARKERS	PARK_HSC_MARKERS		32	0.29467127	0.8384641	0.7094838	0.98699635	1.0	2514	tags=31%, list=34%, signal=47%
SMID_BREAST_CANCER_LUMINAL_B_DN	SMID_BREAST_CANCER_LUMINAL_B_DN		318	0.2320379	0.8382842	0.8748739	0.98682684	1.0	1590	tags=25%, list=21%, signal=31%
MAGRANGEAS_MULTIPLE_MYELOMA_IGLL_VS_IGLK_DN	MAGRANGEAS_MULTIPLE_MYELOMA_IGLL_VS_IGLK_DN		19	0.3296894	0.83805573	0.69973546	0.98674476	1.0	1911	tags=37%, list=26%, signal=49%
NAKAMURA_TUMOR_ZONE_PERIPHERAL_VS_CENTRAL_DN	NAKAMURA_TUMOR_ZONE_PERIPHERAL_VS_CENTRAL_DN		352	0.23035827	0.8374056	0.8815261	0.98742086	1.0	2000	tags=25%, list=27%, signal=33%
JOSEPH_RESPONSE_TO_SODIUM_BUTYRATE_DN	JOSEPH_RESPONSE_TO_SODIUM_BUTYRATE_DN		41	0.27900878	0.83738494	0.7053021	0.98693556	1.0	626	tags=12%, list=8%, signal=13%
RUTELLA_RESPONSE_TO_HGF_VS_CSF2RB_AND_IL4_DN	RUTELLA_RESPONSE_TO_HGF_VS_CSF2RB_AND_IL4_DN		180	0.2385415	0.83715814	0.8254963	0.98685676	1.0	1636	tags=20%, list=22%, signal=25%
BILD_CTNNB1_ONCOGENIC_SIGNATURE	BILD_CTNNB1_ONCOGENIC_SIGNATURE		42	0.28483105	0.83672446	0.7206235	0.98713934	1.0	1830	tags=33%, list=25%, signal=44%
SATO_SILENCED_BY_METHYLATION_IN_PANCREATIC_CANCER_1	SATO_SILENCED_BY_METHYLATION_IN_PANCREATIC_CANCER_1		199	0.2351128	0.83584434	0.8231084	0.98826665	1.0	1395	tags=21%, list=19%, signal=25%
NAKAMURA_METASTASIS_MODEL_UP	NAKAMURA_METASTASIS_MODEL_UP		20	0.3239962	0.8357373	0.7133508	0.9879767	1.0	950	tags=15%, list=13%, signal=17%
REACTOME_METABOLISM_OF_VITAMINS_AND_COFACTORS	REACTOME_METABOLISM_OF_VITAMINS_AND_COFACTORS		31	0.29179776	0.8357308	0.73836476	0.9874755	1.0	384	tags=10%, list=5%, signal=10%
WAMUNYOKOLI_OVARIAN_CANCER_LMP_UP	WAMUNYOKOLI_OVARIAN_CANCER_LMP_UP		149	0.24113946	0.8356785	0.7960251	0.9870636	1.0	2876	tags=42%, list=39%, signal=68%
ALFANO_MYC_TARGETS	ALFANO_MYC_TARGETS		180	0.23854105	0.8356044	0.82061857	0.98667485	1.0	2633	tags=36%, list=35%, signal=55%
REACTOME_DIABETES_PATHWAYS	REACTOME_DIABETES_PATHWAYS		89	0.2526365	0.8354891	0.76746726	0.9863704	1.0	2066	tags=33%, list=28%, signal=45%
GAUSSMANN_MLL_AF4_FUSION_TARGETS_C_UP	GAUSSMANN_MLL_AF4_FUSION_TARGETS_C_UP		83	0.25498188	0.8352331	0.7730337	0.98634917	1.0	3179	tags=53%, list=43%, signal=92%
NIKOLSKY_BREAST_CANCER_7Q21_Q22_AMPLICON	NIKOLSKY_BREAST_CANCER_7Q21_Q22_AMPLICON		34	0.28827736	0.83516765	0.692494	0.9859431	1.0	409	tags=12%, list=5%, signal=12%
REACTOME_SEMA4D_INDUCED_CELL_MIGRATION_AND_GROWTH_CONE_COLLAPSE	REACTOME_SEMA4D_INDUCED_CELL_MIGRATION_AND_GROWTH_CONE_COLLAPSE		16	0.33785555	0.83469087	0.6961853	0.9863314	1.0	1542	tags=31%, list=21%, signal=39%
REACTOME_HEPARAN_SULFATE_HEPARIN_HS_GAG_METABOLISM	REACTOME_HEPARAN_SULFATE_HEPARIN_HS_GAG_METABOLISM		25	0.3146392	0.83408976	0.7117347	0.98692703	1.0	925	tags=24%, list=12%, signal=27%
BOYLAN_MULTIPLE_MYELOMA_C_D_UP	BOYLAN_MULTIPLE_MYELOMA_C_D_UP		67	0.26022595	0.833878	0.75743705	0.9868124	1.0	2734	tags=42%, list=37%, signal=65%
MAHADEVAN_IMATINIB_RESISTANCE_DN	MAHADEVAN_IMATINIB_RESISTANCE_DN		12	0.366353	0.8334431	0.6743516	0.9870974	1.0	680	tags=25%, list=9%, signal=27%
AFFAR_YY1_TARGETS_UP	AFFAR_YY1_TARGETS_UP		94	0.24944757	0.8333796	0.7764706	0.9867015	1.0	1202	tags=18%, list=16%, signal=21%
SCHUETZ_BREAST_CANCER_DUCTAL_INVASIVE_UP	SCHUETZ_BREAST_CANCER_DUCTAL_INVASIVE_UP		258	0.22978331	0.8329295	0.867543	0.98702997	1.0	1534	tags=26%, list=21%, signal=32%
ONO_AML1_TARGETS_DN	ONO_AML1_TARGETS_DN		18	0.32853106	0.83260953	0.7020408	0.98709714	1.0	1760	tags=33%, list=24%, signal=44%
ZWANG_CLASS_1_TRANSIENTLY_INDUCED_BY_EGF	ZWANG_CLASS_1_TRANSIENTLY_INDUCED_BY_EGF		208	0.2351014	0.8315896	0.8574359	0.988494	1.0	2172	tags=30%, list=29%, signal=41%
KAAB_FAILED_HEART_ATRIUM_UP	KAAB_FAILED_HEART_ATRIUM_UP		22	0.31676784	0.8313078	0.70980394	0.98850477	1.0	1260	tags=27%, list=17%, signal=33%
REACTOME_GLUCOSE_METABOLISM	REACTOME_GLUCOSE_METABOLISM		47	0.273555	0.83013034	0.75	0.99018806	1.0	1667	tags=21%, list=22%, signal=27%
BIOCARTA_TCR_PATHWAY	BIOCARTA_TCR_PATHWAY		27	0.29899567	0.83007854	0.7298637	0.9897663	1.0	2122	tags=37%, list=29%, signal=52%
BIOCARTA_CXCR4_PATHWAY	BIOCARTA_CXCR4_PATHWAY		17	0.3306003	0.83007365	0.6970109	0.9892635	1.0	1319	tags=24%, list=18%, signal=29%
KEGG_BASAL_CELL_CARCINOMA	KEGG_BASAL_CELL_CARCINOMA		18	0.3282817	0.8298245	0.686587	0.9892132	1.0	1624	tags=28%, list=22%, signal=35%
WATANABE_RECTAL_CANCER_RADIOTHERAPY_RESPONSIVE_UP	WATANABE_RECTAL_CANCER_RADIOTHERAPY_RESPONSIVE_UP		89	0.24973589	0.82955533	0.7867247	0.989204	1.0	3548	tags=51%, list=48%, signal=96%
BENNETT_SYSTEMIC_LUPUS_ERYTHEMATOSUS	BENNETT_SYSTEMIC_LUPUS_ERYTHEMATOSUS		19	0.32822868	0.8291632	0.74210525	0.98940545	1.0	710	tags=16%, list=10%, signal=17%
GARGALOVIC_RESPONSE_TO_OXIDIZED_PHOSPHOLIPIDS_BLACK_UP	GARGALOVIC_RESPONSE_TO_OXIDIZED_PHOSPHOLIPIDS_BLACK_UP		18	0.32640108	0.8291075	0.7122016	0.98899573	1.0	890	tags=22%, list=12%, signal=25%
MCCABE_HOXC6_TARGETS_DN	MCCABE_HOXC6_TARGETS_DN		10	0.37259337	0.8271239	0.67451525	0.99208915	1.0	1897	tags=40%, list=26%, signal=54%
TSENG_IRS1_TARGETS_DN	TSENG_IRS1_TARGETS_DN		85	0.24973373	0.8265454	0.7599119	0.9926275	1.0	1739	tags=21%, list=23%, signal=27%
VALK_AML_CLUSTER_10	VALK_AML_CLUSTER_10		22	0.31349835	0.82625353	0.72243345	0.9926222	1.0	772	tags=27%, list=10%, signal=30%
DURAND_STROMA_MAX_UP	DURAND_STROMA_MAX_UP		132	0.23989347	0.826066	0.83020836	0.99244946	1.0	968	tags=13%, list=13%, signal=15%
PID_RETINOIC_ACID_PATHWAY	PID_RETINOIC_ACID_PATHWAY		20	0.31865752	0.8259007	0.71632123	0.99224937	1.0	1512	tags=20%, list=20%, signal=25%
POMEROY_MEDULLOBLASTOMA_DESMOPLASIC_VS_CLASSIC_DN	POMEROY_MEDULLOBLASTOMA_DESMOPLASIC_VS_CLASSIC_DN		50	0.27097997	0.82581025	0.7577566	0.9919156	1.0	790	tags=14%, list=11%, signal=16%
MMS_MOUSE_LYMPH_HIGH_4HRS_UP	MMS_MOUSE_LYMPH_HIGH_4HRS_UP		26	0.3025405	0.8256323	0.71483374	0.9917313	1.0	1505	tags=23%, list=20%, signal=29%
WU_HBX_TARGETS_1_DN	WU_HBX_TARGETS_1_DN		13	0.35345945	0.82559186	0.6970547	0.99129635	1.0	710	tags=15%, list=10%, signal=17%
REACTOME_CRMPS_IN_SEMA3A_SIGNALING	REACTOME_CRMPS_IN_SEMA3A_SIGNALING		11	0.36711156	0.825571	0.7275204	0.99082285	1.0	1985	tags=27%, list=27%, signal=37%
ROVERSI_GLIOMA_COPY_NUMBER_UP	ROVERSI_GLIOMA_COPY_NUMBER_UP		45	0.2716001	0.82489693	0.7527011	0.9915217	1.0	1310	tags=20%, list=18%, signal=24%
SMID_BREAST_CANCER_RELAPSE_IN_LUNG_DN	SMID_BREAST_CANCER_RELAPSE_IN_LUNG_DN		18	0.32276112	0.82412994	0.6962677	0.9923422	1.0	1268	tags=28%, list=17%, signal=33%
WAMUNYOKOLI_OVARIAN_CANCER_LMP_DN	WAMUNYOKOLI_OVARIAN_CANCER_LMP_DN		115	0.24062675	0.8239595	0.7991453	0.99212635	1.0	1250	tags=21%, list=17%, signal=25%
KAAB_FAILED_HEART_ATRIUM_DN	KAAB_FAILED_HEART_ATRIUM_DN		121	0.24160135	0.82385033	0.8068303	0.9918159	1.0	1017	tags=11%, list=14%, signal=12%
REACTOME_SIGNALING_BY_PDGF	REACTOME_SIGNALING_BY_PDGF		73	0.2573825	0.8237811	0.7702703	0.9914245	1.0	2493	tags=38%, list=34%, signal=57%
STARK_HYPPOCAMPUS_22Q11_DELETION_DN	STARK_HYPPOCAMPUS_22Q11_DELETION_DN		13	0.34870836	0.82351017	0.6897019	0.9913879	1.0	1707	tags=38%, list=23%, signal=50%
MIPS_EMERIN_COMPLEX_52	MIPS_EMERIN_COMPLEX_52		19	0.32655317	0.82320935	0.71784776	0.9914307	1.0	2957	tags=63%, list=40%, signal=105%
REACTOME_HS_GAG_BIOSYNTHESIS	REACTOME_HS_GAG_BIOSYNTHESIS		12	0.35808474	0.8232028	0.71971834	0.99093485	1.0	925	tags=25%, list=12%, signal=29%
CHIARETTI_T_ALL_REFRACTORY_TO_THERAPY	CHIARETTI_T_ALL_REFRACTORY_TO_THERAPY		19	0.32324255	0.82307017	0.7314815	0.99065137	1.0	456	tags=16%, list=6%, signal=17%
BIOCARTA_IL6_PATHWAY	BIOCARTA_IL6_PATHWAY		18	0.32507148	0.82298785	0.71939474	0.99028796	1.0	1921	tags=33%, list=26%, signal=45%
JOHNSTONE_PARVB_TARGETS_1_DN	JOHNSTONE_PARVB_TARGETS_1_DN		32	0.29190585	0.82281137	0.7311028	0.99009585	1.0	716	tags=19%, list=10%, signal=21%
REACTOME_CD28_CO_STIMULATION	REACTOME_CD28_CO_STIMULATION		14	0.34458464	0.8227207	0.71583223	0.9897627	1.0	1275	tags=36%, list=17%, signal=43%
TIEN_INTESTINE_PROBIOTICS_2HR_UP	TIEN_INTESTINE_PROBIOTICS_2HR_UP		21	0.31200328	0.82222915	0.7260982	0.9901219	1.0	2035	tags=24%, list=27%, signal=33%
KIM_MYC_AMPLIFICATION_TARGETS_DN	KIM_MYC_AMPLIFICATION_TARGETS_DN		43	0.27393103	0.82159466	0.7768595	0.9907877	1.0	1143	tags=21%, list=15%, signal=25%
MULLIGHAN_MLL_SIGNATURE_1_DN	MULLIGHAN_MLL_SIGNATURE_1_DN		156	0.23432378	0.8214872	0.8274428	0.9904711	1.0	2378	tags=37%, list=32%, signal=53%
ENK_UV_RESPONSE_EPIDERMIS_DN	ENK_UV_RESPONSE_EPIDERMIS_DN		366	0.22464603	0.8214332	0.9004024	0.9900588	1.0	1729	tags=24%, list=23%, signal=30%
MAGRANGEAS_MULTIPLE_MYELOMA_IGG_VS_IGA_UP	MAGRANGEAS_MULTIPLE_MYELOMA_IGG_VS_IGA_UP		13	0.35041803	0.8211853	0.7125	0.9899847	1.0	2350	tags=46%, list=32%, signal=67%
WEST_ADRENOCORTICAL_TUMOR_DN	WEST_ADRENOCORTICAL_TUMOR_DN		387	0.2242293	0.8211148	0.8963783	0.9896011	1.0	1778	tags=25%, list=24%, signal=31%
HELLER_HDAC_TARGETS_DN	HELLER_HDAC_TARGETS_DN		199	0.23149027	0.820727	0.86213994	0.9897649	1.0	1590	tags=23%, list=21%, signal=29%
BIOCARTA_ARAP_PATHWAY	BIOCARTA_ARAP_PATHWAY		10	0.37628195	0.82039756	0.7150997	0.98984176	1.0	2958	tags=60%, list=40%, signal=99%
PID_NCADHERINPATHWAY	PID_NCADHERINPATHWAY		24	0.3018329	0.8200635	0.71446866	0.9899274	1.0	2129	tags=42%, list=29%, signal=58%
IZADPANAH_STEM_CELL_ADIPOSE_VS_BONE_DN	IZADPANAH_STEM_CELL_ADIPOSE_VS_BONE_DN		67	0.25550386	0.81952	0.7849099	0.9903706	1.0	2473	tags=48%, list=33%, signal=71%
DAZARD_UV_RESPONSE_CLUSTER_G1	DAZARD_UV_RESPONSE_CLUSTER_G1		50	0.27011892	0.8190961	0.75632185	0.9906286	1.0	710	tags=10%, list=10%, signal=11%
ZWANG_TRANSIENTLY_UP_BY_2ND_EGF_PULSE_ONLY	ZWANG_TRANSIENTLY_UP_BY_2ND_EGF_PULSE_ONLY		336	0.22737275	0.818987	0.9265593	0.9903253	1.0	1224	tags=18%, list=16%, signal=21%
BIOCARTA_PROTEASOME_PATHWAY	BIOCARTA_PROTEASOME_PATHWAY		27	0.30178696	0.81870687	0.7392947	0.9903254	1.0	3770	tags=63%, list=51%, signal=127%
UEDA_PERIFERAL_CLOCK	UEDA_PERIFERAL_CLOCK		106	0.24175426	0.8181624	0.80880773	0.9907688	1.0	1927	tags=23%, list=26%, signal=30%
KENNY_CTNNB1_TARGETS_DN	KENNY_CTNNB1_TARGETS_DN		41	0.2759368	0.8179669	0.75887394	0.99061203	1.0	3289	tags=39%, list=44%, signal=70%
BIOCARTA_P53HYPOXIA_PATHWAY	BIOCARTA_P53HYPOXIA_PATHWAY		14	0.34291768	0.8176236	0.7107438	0.9907201	1.0	1571	tags=36%, list=21%, signal=45%
REACTOME_SIGNALING_BY_FGFR1_FUSION_MUTANTS	REACTOME_SIGNALING_BY_FGFR1_FUSION_MUTANTS		11	0.365848	0.8174099	0.7150917	0.99059725	1.0	2208	tags=45%, list=30%, signal=65%
RUAN_RESPONSE_TO_TNF_TROGLITAZONE_DN	RUAN_RESPONSE_TO_TNF_TROGLITAZONE_DN		27	0.2972384	0.81714606	0.71647507	0.99058175	1.0	791	tags=15%, list=11%, signal=17%
DELASERNA_MYOD_TARGETS_DN	DELASERNA_MYOD_TARGETS_DN		33	0.28311205	0.81698	0.7582418	0.9903642	1.0	2242	tags=36%, list=30%, signal=52%
SCHEIDEREIT_IKK_INTERACTING_PROTEINS	SCHEIDEREIT_IKK_INTERACTING_PROTEINS		39	0.27426016	0.81655097	0.7613219	0.9906213	1.0	2006	tags=33%, list=27%, signal=45%
LEE_CALORIE_RESTRICTION_NEOCORTEX_UP	LEE_CALORIE_RESTRICTION_NEOCORTEX_UP		48	0.2697918	0.81648844	0.7470024	0.99022645	1.0	1790	tags=31%, list=24%, signal=41%
REACTOME_TRAF6_MEDIATED_NFKB_ACTIVATION	REACTOME_TRAF6_MEDIATED_NFKB_ACTIVATION		10	0.36540875	0.81558233	0.7202797	0.99134165	1.0	612	tags=20%, list=8%, signal=22%
LIU_PROSTATE_CANCER_DN	LIU_PROSTATE_CANCER_DN		254	0.2276389	0.8148937	0.8940937	0.99199146	1.0	1534	tags=21%, list=21%, signal=25%
NOUSHMEHR_GBM_SILENCED_BY_METHYLATION	NOUSHMEHR_GBM_SILENCED_BY_METHYLATION		16	0.3363898	0.81457764	0.73521507	0.9920276	1.0	734	tags=19%, list=10%, signal=21%
HOFMANN_CELL_LYMPHOMA_UP	HOFMANN_CELL_LYMPHOMA_UP		30	0.28971362	0.8143526	0.73838633	0.99193287	1.0	2466	tags=53%, list=33%, signal=79%
KAMMINGA_SENESCENCE	KAMMINGA_SENESCENCE		21	0.30818716	0.814321	0.72819215	0.9914892	1.0	2065	tags=33%, list=28%, signal=46%
SCHAEFFER_PROSTATE_DEVELOPMENT_6HR_UP	SCHAEFFER_PROSTATE_DEVELOPMENT_6HR_UP		103	0.2423573	0.8142728	0.81727576	0.9910721	1.0	2099	tags=32%, list=28%, signal=44%
ROME_INSULIN_TARGETS_IN_MUSCLE_UP	ROME_INSULIN_TARGETS_IN_MUSCLE_UP		311	0.22555676	0.81400645	0.91549295	0.99103045	1.0	2497	tags=30%, list=34%, signal=43%
LEE_LIVER_CANCER_E2F1_UP	LEE_LIVER_CANCER_E2F1_UP		40	0.272952	0.8134039	0.7503045	0.99157757	1.0	1342	tags=23%, list=18%, signal=27%
DARWICHE_PAPILLOMA_PROGRESSION_RISK	DARWICHE_PAPILLOMA_PROGRESSION_RISK		30	0.28729215	0.81285465	0.7302205	0.99202484	1.0	2081	tags=40%, list=28%, signal=55%
FONTAINE_FOLLICULAR_THYROID_ADENOMA_DN	FONTAINE_FOLLICULAR_THYROID_ADENOMA_DN		40	0.27345166	0.8122831	0.7677262	0.9925025	1.0	1230	tags=18%, list=17%, signal=21%
PID_S1P_S1P1_PATHWAY	PID_S1P_S1P1_PATHWAY		16	0.3273716	0.81160134	0.75825626	0.9931715	1.0	108	tags=6%, list=1%, signal=6%
DACOSTA_ERCC3_ALLELE_XPCS_VS_TTD_UP	DACOSTA_ERCC3_ALLELE_XPCS_VS_TTD_UP		20	0.31612557	0.81155306	0.7251309	0.9927545	1.0	2266	tags=40%, list=30%, signal=57%
KIM_WT1_TARGETS_8HR_UP	KIM_WT1_TARGETS_8HR_UP		121	0.23472314	0.8114034	0.8444206	0.99249345	1.0	2154	tags=32%, list=29%, signal=45%
KEGG_TGF_BETA_SIGNALING_PATHWAY	KEGG_TGF_BETA_SIGNALING_PATHWAY		47	0.26642364	0.8113702	0.75914997	0.992057	1.0	2449	tags=45%, list=33%, signal=66%
CLAUS_PGR_POSITIVE_MENINGIOMA_DN	CLAUS_PGR_POSITIVE_MENINGIOMA_DN		10	0.37005928	0.8112603	0.7199414	0.99174833	1.0	2841	tags=70%, list=38%, signal=113%
GUO_HEX_TARGETS_DN	GUO_HEX_TARGETS_DN		35	0.27881178	0.8106941	0.75429976	0.99221796	1.0	1373	tags=20%, list=18%, signal=24%
CEBALLOS_TARGETS_OF_TP53_AND_MYC_DN	CEBALLOS_TARGETS_OF_TP53_AND_MYC_DN		24	0.30195653	0.810538	0.7366362	0.99199903	1.0	153	tags=8%, list=2%, signal=8%
WANG_NEOPLASTIC_TRANSFORMATION_BY_CCND1_MYC	WANG_NEOPLASTIC_TRANSFORMATION_BY_CCND1_MYC		11	0.35452345	0.8104288	0.71448666	0.9916883	1.0	263	tags=18%, list=4%, signal=19%
STAMBOLSKY_RESPONSE_TO_VITAMIN_D3_UP	STAMBOLSKY_RESPONSE_TO_VITAMIN_D3_UP		35	0.28151545	0.8101895	0.7648515	0.9915856	1.0	1631	tags=23%, list=22%, signal=29%
PID_FRA_PATHWAY	PID_FRA_PATHWAY		26	0.29712522	0.8099669	0.76943004	0.99144953	1.0	960	tags=19%, list=13%, signal=22%
ABE_VEGFA_TARGETS_2HR	ABE_VEGFA_TARGETS_2HR		22	0.304557	0.80991805	0.7342932	0.9910468	1.0	890	tags=18%, list=12%, signal=21%
[truncated: 562 more rows]

## Sheet: DePreter_r2vsr1_report_r1
NAME	GS<br> follow link to MSigDB	GS DETAILS	SIZE	ES	NES	NOM p-val	FDR q-val	FWER p-val	RANK AT MAX	LEADING EDGE
WONG_ADULT_TISSUE_STEM_MODULE	WONG_ADULT_TISSUE_STEM_MODULE	Details ...	410	-0.22696994			1.0	0.0	839	tags=19%, list=11%, signal=20%
KIM_ALL_DISORDERS_CALB1_CORR_UP	KIM_ALL_DISORDERS_CALB1_CORR_UP	Details ...	468	-0.3318458			1.0	0.0	1179	tags=24%, list=16%, signal=26%
KEGG_INTESTINAL_IMMUNE_NETWORK_FOR_IGA_PRODUCTION	KEGG_INTESTINAL_IMMUNE_NETWORK_FOR_IGA_PRODUCTION	Details ...	15	-0.8078003	-2.392621	0.0	6.13951E-4	0.0010	926	tags=73%, list=12%, signal=84%
WIERENGA_STAT5A_TARGETS_GROUP2	WIERENGA_STAT5A_TARGETS_GROUP2	Details ...	31	-0.6186517	-2.2412603	0.0	0.009140284	0.02	1180	tags=52%, list=16%, signal=61%
PEPPER_CHRONIC_LYMPHOCYTIC_LEUKEMIA_UP	PEPPER_CHRONIC_LYMPHOCYTIC_LEUKEMIA_UP	Details ...	14	-0.7495562	-2.217999	0.0	0.013117348	0.037	219	tags=36%, list=3%, signal=37%
DIAZ_CHRONIC_MEYLOGENOUS_LEUKEMIA_DN	DIAZ_CHRONIC_MEYLOGENOUS_LEUKEMIA_DN	Details ...	78	-0.49850374	-2.2042713	0.0	0.014935365	0.051	1336	tags=41%, list=18%, signal=49%
KEGG_ASTHMA	KEGG_ASTHMA	Details ...	10	-0.840504	-2.1811614	0.0	0.016709233	0.067	926	tags=90%, list=12%, signal=103%
MCLACHLAN_DENTAL_CARIES_UP	MCLACHLAN_DENTAL_CARIES_UP	Details ...	174	-0.44219568	-2.1685762	0.0	0.018102156	0.082	1024	tags=39%, list=14%, signal=44%
LE_EGR2_TARGETS_DN	LE_EGR2_TARGETS_DN	Details ...	71	-0.4934437	-2.1582918	0.0	0.018561052	0.095	1053	tags=35%, list=14%, signal=41%
PID_INTEGRIN_CS_PATHWAY	PID_INTEGRIN_CS_PATHWAY	Details ...	14	-0.7530073	-2.1491523	0.0	0.019989086	0.111	1117	tags=64%, list=15%, signal=76%
NAGASHIMA_EGF_SIGNALING_UP	NAGASHIMA_EGF_SIGNALING_UP	Details ...	42	-0.5600971	-2.1192303	0.0	0.027887767	0.165	895	tags=40%, list=12%, signal=46%
GOLUB_ALL_VS_AML_DN	GOLUB_ALL_VS_AML_DN	Details ...	17	-0.6938633	-2.1188743	0.003690037	0.025707837	0.166	685	tags=53%, list=9%, signal=58%
TAKEDA_TARGETS_OF_NUP98_HOXA9_FUSION_10D_DN	TAKEDA_TARGETS_OF_NUP98_HOXA9_FUSION_10D_DN	Details ...	59	-0.5017572	-2.1171668	0.0	0.024133584	0.169	1082	tags=39%, list=15%, signal=45%
HAHTOLA_MYCOSIS_FUNGOIDES_CD4_UP	HAHTOLA_MYCOSIS_FUNGOIDES_CD4_UP	Details ...	49	-0.54998183	-2.1080527	0.0	0.024870344	0.185	862	tags=41%, list=12%, signal=46%
KEGG_METABOLISM_OF_XENOBIOTICS_BY_CYTOCHROME_P450	KEGG_METABOLISM_OF_XENOBIOTICS_BY_CYTOCHROME_P450	Details ...	30	-0.5996284	-2.1059208	0.0	0.024024364	0.192	942	tags=40%, list=13%, signal=46%
BEIER_GLIOMA_STEM_CELL_DN	BEIER_GLIOMA_STEM_CELL_DN	Details ...	35	-0.5658853	-2.0902407	0.0	0.028022371	0.225	926	tags=40%, list=12%, signal=45%
MOREAUX_B_LYMPHOCYTE_MATURATION_BY_TACI_UP	MOREAUX_B_LYMPHOCYTE_MATURATION_BY_TACI_UP	Details ...	59	-0.5192826	-2.0877895	0.0	0.027071308	0.23	1699	tags=44%, list=23%, signal=57%
TAKEDA_TARGETS_OF_NUP98_HOXA9_FUSION_8D_DN	TAKEDA_TARGETS_OF_NUP98_HOXA9_FUSION_8D_DN	Details ...	84	-0.4740832	-2.0810754	0.0	0.027567541	0.245	750	tags=32%, list=10%, signal=35%
BROWNE_HCMV_INFECTION_2HR_UP	BROWNE_HCMV_INFECTION_2HR_UP	Details ...	25	-0.60252845	-2.0792804	0.0	0.026923321	0.252	436	tags=32%, list=6%, signal=34%
KEGG_GRAFT_VERSUS_HOST_DISEASE	KEGG_GRAFT_VERSUS_HOST_DISEASE	Details ...	16	-0.68623763	-2.070529	0.0	0.027969878	0.275	1477	tags=69%, list=20%, signal=86%
GRAHAM_CML_QUIESCENT_VS_NORMAL_QUIESCENT_DN	GRAHAM_CML_QUIESCENT_VS_NORMAL_QUIESCENT_DN		32	-0.5800304	-2.0682468	0.0	0.027208151	0.28	930	tags=41%, list=13%, signal=46%
LIM_MAMMARY_LUMINAL_PROGENITOR_UP	LIM_MAMMARY_LUMINAL_PROGENITOR_UP		18	-0.6665889	-2.066113	0.0	0.026362123	0.283	430	tags=39%, list=6%, signal=41%
ZHAN_MULTIPLE_MYELOMA_DN	ZHAN_MULTIPLE_MYELOMA_DN		27	-0.5943628	-2.0649078	0.0048076925	0.02557915	0.287	1077	tags=52%, list=14%, signal=60%
YANG_MUC2_TARGETS_DUODENUM_6MO_DN	YANG_MUC2_TARGETS_DUODENUM_6MO_DN		10	-0.7846314	-2.05882	0.0	0.025940128	0.3	1107	tags=60%, list=15%, signal=70%
CHO_NR4A1_TARGETS	CHO_NR4A1_TARGETS		15	-0.7077314	-2.057927	0.0	0.025174594	0.302	1033	tags=47%, list=14%, signal=54%
GAUSSMANN_MLL_AF4_FUSION_TARGETS_F_DN	GAUSSMANN_MLL_AF4_FUSION_TARGETS_F_DN		19	-0.6252408	-2.0564063	0.004115226	0.024675576	0.309	976	tags=47%, list=13%, signal=54%
BASSO_CD40_SIGNALING_UP	BASSO_CD40_SIGNALING_UP		62	-0.4971171	-2.0436978	0.0	0.028196786	0.359	1386	tags=50%, list=19%, signal=61%
UZONYI_RESPONSE_TO_LEUKOTRIENE_AND_THROMBIN	UZONYI_RESPONSE_TO_LEUKOTRIENE_AND_THROMBIN		25	-0.60594743	-2.0402446	0.0	0.028239608	0.371	1427	tags=56%, list=19%, signal=69%
KEGG_ALLOGRAFT_REJECTION	KEGG_ALLOGRAFT_REJECTION		16	-0.68623763	-2.0292976	0.003690037	0.030164456	0.399	1477	tags=69%, list=20%, signal=86%
MIKKELSEN_IPS_LCP_WITH_H3K4ME3	MIKKELSEN_IPS_LCP_WITH_H3K4ME3		47	-0.5210739	-2.0187278	0.0	0.032466576	0.428	1215	tags=47%, list=16%, signal=56%
ONDER_CDH1_TARGETS_3_DN	ONDER_CDH1_TARGETS_3_DN		14	-0.700531	-2.0141385	0.004048583	0.03247009	0.434	1230	tags=71%, list=17%, signal=85%
YANG_MUC2_TARGETS_DUODENUM_3MO_DN	YANG_MUC2_TARGETS_DUODENUM_3MO_DN		11	-0.73708963	-2.008704	0.0	0.033010643	0.453	1107	tags=55%, list=15%, signal=64%
ST_GA12_PATHWAY	ST_GA12_PATHWAY		12	-0.7436924	-2.0040405	0.0	0.033845626	0.468	832	tags=58%, list=11%, signal=66%
BOYLAN_MULTIPLE_MYELOMA_C_DN	BOYLAN_MULTIPLE_MYELOMA_C_DN		31	-0.54724455	-2.0003808	0.0	0.03375534	0.479	898	tags=52%, list=12%, signal=58%
REACTOME_LIPID_DIGESTION_MOBILIZATION_AND_TRANSPORT	REACTOME_LIPID_DIGESTION_MOBILIZATION_AND_TRANSPORT		30	-0.57055044	-1.9977474	0.0	0.03397342	0.49	478	tags=30%, list=6%, signal=32%
MOREAUX_MULTIPLE_MYELOMA_BY_TACI_UP	MOREAUX_MULTIPLE_MYELOMA_BY_TACI_UP		194	-0.41440392	-1.9961479	0.0	0.033461526	0.495	1704	tags=44%, list=23%, signal=55%
PAPASPYRIDONOS_UNSTABLE_ATEROSCLEROTIC_PLAQUE_UP	PAPASPYRIDONOS_UNSTABLE_ATEROSCLEROTIC_PLAQUE_UP		34	-0.54698366	-1.9766086	0.0	0.040583663	0.582	931	tags=35%, list=13%, signal=40%
SAGIV_CD24_TARGETS_DN	SAGIV_CD24_TARGETS_DN		33	-0.5570334	-1.9685544	0.0	0.042756103	0.61	793	tags=45%, list=11%, signal=51%
WINZEN_DEGRADED_VIA_KHSRP	WINZEN_DEGRADED_VIA_KHSRP		50	-0.50486344	-1.9629793	0.0	0.04419078	0.629	567	tags=36%, list=8%, signal=39%
BIOCARTA_NDKDYNAMIN_PATHWAY	BIOCARTA_NDKDYNAMIN_PATHWAY		11	-0.75734663	-1.9629546	0.006369427	0.043129094	0.629	1247	tags=45%, list=17%, signal=55%
DAZARD_UV_RESPONSE_CLUSTER_G2	DAZARD_UV_RESPONSE_CLUSTER_G2		19	-0.6316418	-1.9521707	0.0	0.04678615	0.676	338	tags=32%, list=5%, signal=33%
LEIN_NEURON_MARKERS	LEIN_NEURON_MARKERS		37	-0.5136551	-1.9508108	0.0	0.046238102	0.68	1061	tags=46%, list=14%, signal=53%
HU_ANGIOGENESIS_UP	HU_ANGIOGENESIS_UP		11	-0.74150324	-1.9463384	0.0034364262	0.046870068	0.697	940	tags=64%, list=13%, signal=73%
ONDER_CDH1_TARGETS_2_DN	ONDER_CDH1_TARGETS_2_DN		216	-0.3717094	-1.921327	0.0	0.057477858	0.773	909	tags=31%, list=12%, signal=35%
REACTOME_GABA_RECEPTOR_ACTIVATION	REACTOME_GABA_RECEPTOR_ACTIVATION		18	-0.61559486	-1.8985097	0.003984064	0.0699007	0.836	630	tags=22%, list=8%, signal=24%
LENAOUR_DENDRITIC_CELL_MATURATION_UP	LENAOUR_DENDRITIC_CELL_MATURATION_UP		77	-0.4481617	-1.8791121	0.0	0.08203349	0.895	807	tags=29%, list=11%, signal=32%
REACTOME_GLUTATHIONE_CONJUGATION	REACTOME_GLUTATHIONE_CONJUGATION		13	-0.69085884	-1.8768175	0.00754717	0.081900485	0.897	826	tags=54%, list=11%, signal=60%
LIN_SILENCED_BY_TUMOR_MICROENVIRONMENT	LIN_SILENCED_BY_TUMOR_MICROENVIRONMENT		31	-0.5440104	-1.8759531	0.0	0.08051322	0.897	1196	tags=52%, list=16%, signal=61%
APPEL_IMATINIB_RESPONSE	APPEL_IMATINIB_RESPONSE		24	-0.5519859	-1.8730428	0.0	0.08097442	0.906	1713	tags=63%, list=23%, signal=81%
VERHAAK_AML_WITH_NPM1_MUTATED_UP	VERHAAK_AML_WITH_NPM1_MUTATED_UP		103	-0.41608542	-1.870317	0.0	0.08110671	0.91	1165	tags=38%, list=16%, signal=44%
LEE_LIVER_CANCER_CIPROFIBRATE_DN	LEE_LIVER_CANCER_CIPROFIBRATE_DN		29	-0.54679453	-1.858547	0.0	0.0887752	0.935	1136	tags=41%, list=15%, signal=49%
KEGG_STEROID_HORMONE_BIOSYNTHESIS	KEGG_STEROID_HORMONE_BIOSYNTHESIS		22	-0.5598576	-1.8557785	0.0	0.0891815	0.942	516	tags=18%, list=7%, signal=19%
LENAOUR_DENDRITIC_CELL_MATURATION_DN	LENAOUR_DENDRITIC_CELL_MATURATION_DN		86	-0.42006713	-1.8519988	0.0	0.09013628	0.948	1248	tags=36%, list=17%, signal=43%
LEIN_ASTROCYTE_MARKERS	LEIN_ASTROCYTE_MARKERS		23	-0.5449429	-1.8515288	0.004608295	0.0885316	0.948	628	tags=35%, list=8%, signal=38%
DAVIES_MULTIPLE_MYELOMA_VS_MGUS_DN	DAVIES_MULTIPLE_MYELOMA_VS_MGUS_DN		18	-0.6006419	-1.8505265	0.0080	0.08766963	0.95	992	tags=39%, list=13%, signal=45%
TIAN_TNF_SIGNALING_NOT_VIA_NFKB	TIAN_TNF_SIGNALING_NOT_VIA_NFKB		20	-0.59195566	-1.8495609	0.008888889	0.086558476	0.951	793	tags=50%, list=11%, signal=56%
NAKAJIMA_MAST_CELL	NAKAJIMA_MAST_CELL		34	-0.49286187	-1.8423895	0.0	0.08978714	0.958	519	tags=29%, list=7%, signal=31%
HALMOS_CEBPA_TARGETS_UP	HALMOS_CEBPA_TARGETS_UP		35	-0.5143541	-1.8363032	0.0	0.09335269	0.965	370	tags=29%, list=5%, signal=30%
KEGG_CELL_ADHESION_MOLECULES_CAMS	KEGG_CELL_ADHESION_MOLECULES_CAMS		72	-0.43426165	-1.8317437	0.0	0.09529242	0.971	1388	tags=47%, list=19%, signal=57%
MCLACHLAN_DENTAL_CARIES_DN	MCLACHLAN_DENTAL_CARIES_DN		170	-0.37840703	-1.8298984	0.0	0.09496614	0.973	1024	tags=35%, list=14%, signal=39%
JIANG_AGING_HYPOTHALAMUS_DN	JIANG_AGING_HYPOTHALAMUS_DN		35	-0.5024083	-1.8255748	0.0	0.09728044	0.975	1113	tags=34%, list=15%, signal=40%
PARK_APL_PATHOGENESIS_DN	PARK_APL_PATHOGENESIS_DN		34	-0.50199205	-1.8220254	0.004901961	0.09877217	0.981	510	tags=32%, list=7%, signal=35%
AMIT_SERUM_RESPONSE_40_MCF10A	AMIT_SERUM_RESPONSE_40_MCF10A		23	-0.55328786	-1.819186	0.0049751243	0.099043936	0.982	924	tags=43%, list=12%, signal=49%
STEARMAN_LUNG_CANCER_EARLY_VS_LATE_DN	STEARMAN_LUNG_CANCER_EARLY_VS_LATE_DN		30	-0.5065953	-1.8140584	0.0	0.1015493	0.984	984	tags=33%, list=13%, signal=38%
MIKKELSEN_NPC_LCP_WITH_H3K4ME3	MIKKELSEN_NPC_LCP_WITH_H3K4ME3		19	-0.5810473	-1.8137211	0.008583691	0.10038129	0.985	1102	tags=37%, list=15%, signal=43%
XU_HGF_SIGNALING_NOT_VIA_AKT1_6HR	XU_HGF_SIGNALING_NOT_VIA_AKT1_6HR		18	-0.60193604	-1.813112	0.0	0.099431	0.985	788	tags=50%, list=11%, signal=56%
VERRECCHIA_RESPONSE_TO_TGFB1_C3	VERRECCHIA_RESPONSE_TO_TGFB1_C3		12	-0.68267196	-1.812012	0.020689655	0.098683186	0.985	1288	tags=67%, list=17%, signal=80%
STEARMAN_TUMOR_FIELD_EFFECT_UP	STEARMAN_TUMOR_FIELD_EFFECT_UP		19	-0.57668483	-1.8112764	0.008547009	0.09779186	0.985	1008	tags=53%, list=14%, signal=61%
PICCALUGA_ANGIOIMMUNOBLASTIC_LYMPHOMA_DN	PICCALUGA_ANGIOIMMUNOBLASTIC_LYMPHOMA_DN		81	-0.41942263	-1.8111687	0.0	0.096374586	0.985	1180	tags=35%, list=16%, signal=41%
SPIRA_SMOKERS_LUNG_CANCER_UP	SPIRA_SMOKERS_LUNG_CANCER_UP		31	-0.4980425	-1.8088377	0.016216217	0.096951514	0.986	1310	tags=39%, list=18%, signal=47%
ZWANG_CLASS_3_TRANSIENTLY_INDUCED_BY_EGF	ZWANG_CLASS_3_TRANSIENTLY_INDUCED_BY_EGF		102	-0.39813402	-1.8075631	0.0	0.09659011	0.986	1072	tags=36%, list=14%, signal=42%
JOHANSSON_BRAIN_CANCER_EARLY_VS_LATE_DN	JOHANSSON_BRAIN_CANCER_EARLY_VS_LATE_DN		36	-0.49986404	-1.7987895	0.0	0.10138493	0.991	1098	tags=39%, list=15%, signal=45%
KEGG_ETHER_LIPID_METABOLISM	KEGG_ETHER_LIPID_METABOLISM		10	-0.67863774	-1.7970655	0.020618556	0.10159094	0.991	1021	tags=50%, list=14%, signal=58%
TONKS_TARGETS_OF_RUNX1_RUNX1T1_FUSION_ERYTHROCYTE_UP	TONKS_TARGETS_OF_RUNX1_RUNX1T1_FUSION_ERYTHROCYTE_UP		105	-0.4031436	-1.7967536	0.0	0.10054394	0.991	1388	tags=40%, list=19%, signal=48%
XU_HGF_TARGETS_REPRESSED_BY_AKT1_DN	XU_HGF_TARGETS_REPRESSED_BY_AKT1_DN		34	-0.48615173	-1.785189	0.0	0.1085881	0.994	736	tags=35%, list=10%, signal=39%
NAKAJIMA_EOSINOPHIL	NAKAJIMA_EOSINOPHIL		10	-0.70474267	-1.7845128	0.0033670033	0.10768031	0.994	386	tags=50%, list=5%, signal=53%
ZHAN_LATE_DIFFERENTIATION_GENES_UP	ZHAN_LATE_DIFFERENTIATION_GENES_UP		27	-0.51431865	-1.7723022	0.0043668123	0.11668323	0.997	1467	tags=56%, list=20%, signal=69%
PIEPOLI_LGI1_TARGETS_UP	PIEPOLI_LGI1_TARGETS_UP		10	-0.6406275	-1.7713566	0.013745705	0.11605128	0.997	506	tags=50%, list=7%, signal=54%
LEE_TARGETS_OF_PTCH1_AND_SUFU_UP	LEE_TARGETS_OF_PTCH1_AND_SUFU_UP		46	-0.44874913	-1.7649081	0.0	0.11998713	0.997	880	tags=33%, list=12%, signal=37%
REACTOME_IRON_UPTAKE_AND_TRANSPORT	REACTOME_IRON_UPTAKE_AND_TRANSPORT		23	-0.5385702	-1.7637134	0.012295082	0.11945235	0.997	1635	tags=57%, list=22%, signal=72%
KEGG_GLYCOSPHINGOLIPID_BIOSYNTHESIS_LACTO_AND_NEOLACTO_SERIES	KEGG_GLYCOSPHINGOLIPID_BIOSYNTHESIS_LACTO_AND_NEOLACTO_SERIES		12	-0.64453954	-1.7621118	0.0102739725	0.11944705	0.997	1266	tags=58%, list=17%, signal=70%
CAVARD_LIVER_CANCER_MALIGNANT_VS_BENIGN	CAVARD_LIVER_CANCER_MALIGNANT_VS_BENIGN		18	-0.5674917	-1.7616184	0.011904762	0.11824458	0.997	1186	tags=44%, list=16%, signal=53%
PID_SYNDECAN_3_PATHWAY	PID_SYNDECAN_3_PATHWAY		12	-0.6484943	-1.7591451	0.031914894	0.118975714	0.998	227	tags=42%, list=3%, signal=43%
CHIANG_LIVER_CANCER_SUBCLASS_CTNNB1_UP	CHIANG_LIVER_CANCER_SUBCLASS_CTNNB1_UP		60	-0.41203973	-1.7575558	0.0	0.11886412	0.998	988	tags=38%, list=13%, signal=44%
BURTON_ADIPOGENESIS_10	BURTON_ADIPOGENESIS_10		20	-0.5439909	-1.7555299	0.009433962	0.119118564	0.998	80	tags=15%, list=1%, signal=15%
PETROVA_ENDOTHELIUM_LYMPHATIC_VS_BLOOD_DN	PETROVA_ENDOTHELIUM_LYMPHATIC_VS_BLOOD_DN		125	-0.37359482	-1.7545403	0.0	0.11861473	0.998	1443	tags=38%, list=19%, signal=46%
SANSOM_APC_TARGETS_DN	SANSOM_APC_TARGETS_DN		170	-0.36091447	-1.752502	0.0	0.118943594	0.998	1039	tags=29%, list=14%, signal=33%
TONKS_TARGETS_OF_RUNX1_RUNX1T1_FUSION_SUSTAINDED_IN_ERYTHROCYTE_UP	TONKS_TARGETS_OF_RUNX1_RUNX1T1_FUSION_SUSTAINDED_IN_ERYTHROCYTE_UP		37	-0.48976606	-1.7501833	0.0056179776	0.11920544	0.998	1388	tags=49%, list=19%, signal=60%
MARKEY_RB1_CHRONIC_LOF_DN	MARKEY_RB1_CHRONIC_LOF_DN		70	-0.40898755	-1.7471902	0.0	0.120595925	0.999	1199	tags=40%, list=16%, signal=47%
RHEIN_ALL_GLUCOCORTICOID_THERAPY_UP	RHEIN_ALL_GLUCOCORTICOID_THERAPY_UP		51	-0.45525602	-1.7454267	0.0	0.120843284	0.999	990	tags=39%, list=13%, signal=45%
LIAN_LIPA_TARGETS_6M	LIAN_LIPA_TARGETS_6M		31	-0.48804444	-1.7442167	0.0	0.12035037	0.999	932	tags=42%, list=13%, signal=48%
BEIER_GLIOMA_STEM_CELL_UP	BEIER_GLIOMA_STEM_CELL_UP		10	-0.65593195	-1.7418327	0.013840831	0.12141033	1.0	408	tags=40%, list=5%, signal=42%
REACTOME_TRANSMISSION_ACROSS_CHEMICAL_SYNAPSES	REACTOME_TRANSMISSION_ACROSS_CHEMICAL_SYNAPSES		83	-0.40075895	-1.7387842	0.0	0.12257783	1.0	880	tags=25%, list=12%, signal=28%
DAUER_STAT3_TARGETS_UP	DAUER_STAT3_TARGETS_UP		39	-0.46651745	-1.7381389	0.0	0.12182502	1.0	1578	tags=51%, list=21%, signal=65%
REACTOME_LIPOPROTEIN_METABOLISM	REACTOME_LIPOPROTEIN_METABOLISM		20	-0.54831505	-1.7364794	0.009852217	0.121951394	1.0	1606	tags=60%, list=22%, signal=76%
MOHANKUMAR_TLX1_TARGETS_DN	MOHANKUMAR_TLX1_TARGETS_DN		82	-0.39572453	-1.7344463	0.0	0.12256614	1.0	784	tags=27%, list=11%, signal=30%
CONCANNON_APOPTOSIS_BY_EPOXOMICIN_UP	CONCANNON_APOPTOSIS_BY_EPOXOMICIN_UP		167	-0.36225495	-1.7323642	0.0	0.123147644	1.0	993	tags=31%, list=13%, signal=34%
REACTOME_GAP_JUNCTION_TRAFFICKING	REACTOME_GAP_JUNCTION_TRAFFICKING		11	-0.63788134	-1.7317079	0.026755853	0.12246666	1.0	1455	tags=55%, list=20%, signal=68%
REACTOME_ADVANCED_GLYCOSYLATION_ENDPRODUCT_RECEPTOR_SIGNALING	REACTOME_ADVANCED_GLYCOSYLATION_ENDPRODUCT_RECEPTOR_SIGNALING		10	-0.66125304	-1.7265092	0.025641026	0.12570247	1.0	501	tags=30%, list=7%, signal=32%
KEGG_DRUG_METABOLISM_CYTOCHROME_P450	KEGG_DRUG_METABOLISM_CYTOCHROME_P450		30	-0.49383917	-1.7117165	0.0056497175	0.13808888	1.0	1325	tags=43%, list=18%, signal=53%
PODAR_RESPONSE_TO_ADAPHOSTIN_UP	PODAR_RESPONSE_TO_ADAPHOSTIN_UP		110	-0.38426036	-1.710809	0.0	0.13764371	1.0	1111	tags=32%, list=15%, signal=37%
SABATES_COLORECTAL_ADENOMA_UP	SABATES_COLORECTAL_ADENOMA_UP		39	-0.444096	-1.7100713	0.0	0.1369326	1.0	758	tags=38%, list=10%, signal=43%
GERY_CEBP_TARGETS	GERY_CEBP_TARGETS		77	-0.39650205	-1.7099521	0.0	0.13568734	1.0	1012	tags=31%, list=14%, signal=36%
BASSO_HAIRY_CELL_LEUKEMIA_DN	BASSO_HAIRY_CELL_LEUKEMIA_DN		60	-0.41045955	-1.705489	0.0070921984	0.13822727	1.0	582	tags=25%, list=8%, signal=27%
KEGG_LYSOSOME	KEGG_LYSOSOME		84	-0.3870084	-1.7038352	0.0	0.13858569	1.0	1627	tags=49%, list=22%, signal=62%
ICHIBA_GRAFT_VERSUS_HOST_DISEASE_35D_UP	ICHIBA_GRAFT_VERSUS_HOST_DISEASE_35D_UP		81	-0.39677513	-1.7035987	0.0	0.13763101	1.0	962	tags=36%, list=13%, signal=41%
VANDESLUIS_COMMD1_TARGETS_GROUP_3_DN	VANDESLUIS_COMMD1_TARGETS_GROUP_3_DN		18	-0.5454973	-1.6965802	0.012048192	0.14310022	1.0	1464	tags=61%, list=20%, signal=76%
ROSS_ACUTE_MYELOID_LEUKEMIA_CBF	ROSS_ACUTE_MYELOID_LEUKEMIA_CBF		52	-0.41965443	-1.696439	0.0	0.14193527	1.0	688	tags=21%, list=9%, signal=23%
REACTOME_INSULIN_RECEPTOR_RECYCLING	REACTOME_INSULIN_RECEPTOR_RECYCLING		14	-0.58452886	-1.6936591	0.011952192	0.14331225	1.0	1833	tags=64%, list=25%, signal=85%
REACTOME_NEUROTRANSMITTER_RECEPTOR_BINDING_AND_DOWNSTREAM_TRANSMISSION_IN_THE_POSTSYNAPTIC_CELL	REACTOME_NEUROTRANSMITTER_RECEPTOR_BINDING_AND_DOWNSTREAM_TRANSMISSION_IN_THE_POSTSYNAPTIC_CELL		57	-0.4004795	-1.6915665	0.0	0.14410241	1.0	880	tags=26%, list=12%, signal=30%
LIAN_LIPA_TARGETS_3M	LIAN_LIPA_TARGETS_3M		24	-0.5123407	-1.6911621	0.0045454544	0.1432342	1.0	540	tags=38%, list=7%, signal=40%
AMIT_DELAYED_EARLY_GENES	AMIT_DELAYED_EARLY_GENES		16	-0.56380844	-1.689942	0.026022306	0.14315303	1.0	789	tags=38%, list=11%, signal=42%
DUNNE_TARGETS_OF_AML1_MTG8_FUSION_UP	DUNNE_TARGETS_OF_AML1_MTG8_FUSION_UP		23	-0.52927166	-1.6882962	0.01904762	0.14341336	1.0	913	tags=39%, list=12%, signal=44%
AMIT_EGF_RESPONSE_60_HELA	AMIT_EGF_RESPONSE_60_HELA		36	-0.4578303	-1.6876498	0.005524862	0.14262399	1.0	605	tags=31%, list=8%, signal=33%
MORI_EMU_MYC_LYMPHOMA_BY_ONSET_TIME_DN	MORI_EMU_MYC_LYMPHOMA_BY_ONSET_TIME_DN		12	-0.613283	-1.6850358	0.017006803	0.1439061	1.0	1385	tags=50%, list=19%, signal=61%
WENG_POR_DOSAGE	WENG_POR_DOSAGE		11	-0.63137174	-1.679989	0.026058631	0.14779963	1.0	2149	tags=64%, list=29%, signal=89%
REACTOME_ION_CHANNEL_TRANSPORT	REACTOME_ION_CHANNEL_TRANSPORT		18	-0.54407394	-1.6784345	0.016736401	0.1483691	1.0	856	tags=39%, list=12%, signal=44%
KEGG_GLYCOSAMINOGLYCAN_DEGRADATION	KEGG_GLYCOSAMINOGLYCAN_DEGRADATION		11	-0.6233814	-1.6773683	0.032894738	0.14806113	1.0	1622	tags=82%, list=22%, signal=104%
SMIRNOV_CIRCULATING_ENDOTHELIOCYTES_IN_CANCER_UP	SMIRNOV_CIRCULATING_ENDOTHELIOCYTES_IN_CANCER_UP		102	-0.36643326	-1.6692933	0.0	0.15479657	1.0	1351	tags=42%, list=18%, signal=51%
PLASARI_NFIC_TARGETS_BASAL_UP	PLASARI_NFIC_TARGETS_BASAL_UP		11	-0.638446	-1.6687971	0.036764707	0.15396483	1.0	752	tags=55%, list=10%, signal=61%
WILENSKY_RESPONSE_TO_DARAPLADIB	WILENSKY_RESPONSE_TO_DARAPLADIB		14	-0.5683566	-1.6675477	0.032128513	0.15386462	1.0	1627	tags=64%, list=22%, signal=82%
LEE_LIVER_CANCER_ACOX1_UP	LEE_LIVER_CANCER_ACOX1_UP		43	-0.43113017	-1.667278	0.012658228	0.15284222	1.0	1225	tags=40%, list=16%, signal=47%
GHANDHI_BYSTANDER_IRRADIATION_UP	GHANDHI_BYSTANDER_IRRADIATION_UP		44	-0.4253994	-1.6663435	0.006451613	0.15298523	1.0	1024	tags=32%, list=14%, signal=37%
REACTOME_CHYLOMICRON_MEDIATED_LIPID_TRANSPORT	REACTOME_CHYLOMICRON_MEDIATED_LIPID_TRANSPORT		12	-0.60833776	-1.6651016	0.022813689	0.15309475	1.0	1606	tags=58%, list=22%, signal=74%
REACTOME_GLYCEROPHOSPHOLIPID_BIOSYNTHESIS	REACTOME_GLYCEROPHOSPHOLIPID_BIOSYNTHESIS		33	-0.4711388	-1.6619303	0.009708738	0.15498535	1.0	1080	tags=33%, list=15%, signal=39%
SILIGAN_BOUND_BY_EWS_FLT1_FUSION	SILIGAN_BOUND_BY_EWS_FLT1_FUSION		16	-0.556423	-1.660637	0.032490976	0.15512972	1.0	465	tags=31%, list=6%, signal=33%
IZADPANAH_STEM_CELL_ADIPOSE_VS_BONE_UP	IZADPANAH_STEM_CELL_ADIPOSE_VS_BONE_UP		75	-0.37844265	-1.6588876	0.0	0.15557088	1.0	760	tags=24%, list=10%, signal=26%
RUTELLA_RESPONSE_TO_HGF_UP	RUTELLA_RESPONSE_TO_HGF_UP		309	-0.30655855	-1.6556308	0.0	0.15771301	1.0	1458	tags=34%, list=20%, signal=40%
BENPORATH_PRC2_TARGETS	BENPORATH_PRC2_TARGETS		152	-0.34264395	-1.6502264	0.0	0.16193168	1.0	869	tags=32%, list=12%, signal=35%
PACHER_TARGETS_OF_IGF1_AND_IGF2_UP	PACHER_TARGETS_OF_IGF1_AND_IGF2_UP		25	-0.49284536	-1.6500009	0.015706806	0.16090994	1.0	1960	tags=52%, list=26%, signal=70%
AMIT_EGF_RESPONSE_40_HELA	AMIT_EGF_RESPONSE_40_HELA		34	-0.4651487	-1.6459332	0.016393442	0.16355743	1.0	1427	tags=47%, list=19%, signal=58%
PATTERSON_DOCETAXEL_RESISTANCE	PATTERSON_DOCETAXEL_RESISTANCE		20	-0.5140474	-1.6456316	0.029166667	0.16261369	1.0	807	tags=30%, list=11%, signal=34%
MIKKELSEN_ES_LCP_WITH_H3K4ME3	MIKKELSEN_ES_LCP_WITH_H3K4ME3		35	-0.4616997	-1.643399	0.024539877	0.16384126	1.0	1181	tags=37%, list=16%, signal=44%
WENG_POR_TARGETS_LIVER_UP	WENG_POR_TARGETS_LIVER_UP		24	-0.48438165	-1.6431233	0.028037382	0.16276126	1.0	905	tags=33%, list=12%, signal=38%
PHONG_TNF_RESPONSE_VIA_P38_PARTIAL	PHONG_TNF_RESPONSE_VIA_P38_PARTIAL		116	-0.356311	-1.6404872	0.0	0.16424595	1.0	944	tags=32%, list=13%, signal=36%
SERVITJA_ISLET_HNF1A_TARGETS_UP	SERVITJA_ISLET_HNF1A_TARGETS_UP		114	-0.36035347	-1.6384717	0.0	0.16531591	1.0	1005	tags=35%, list=14%, signal=40%
WENG_POR_TARGETS_GLOBAL_DN	WENG_POR_TARGETS_GLOBAL_DN		14	-0.57625496	-1.6269844	0.032	0.17624383	1.0	839	tags=36%, list=11%, signal=40%
RICKMAN_HEAD_AND_NECK_CANCER_C	RICKMAN_HEAD_AND_NECK_CANCER_C		25	-0.49063244	-1.6204334	0.018691588	0.18299124	1.0	758	tags=40%, list=10%, signal=44%
GOZGIT_ESR1_TARGETS_DN	GOZGIT_ESR1_TARGETS_DN		333	-0.30384332	-1.6157153	0.0	0.18735059	1.0	834	tags=25%, list=11%, signal=27%
ACEVEDO_LIVER_CANCER_WITH_H3K9ME3_UP	ACEVEDO_LIVER_CANCER_WITH_H3K9ME3_UP		30	-0.45337787	-1.6132412	0.014705882	0.18897732	1.0	504	tags=33%, list=7%, signal=36%
ALTEMEIER_RESPONSE_TO_LPS_WITH_MECHANICAL_VENTILATION	ALTEMEIER_RESPONSE_TO_LPS_WITH_MECHANICAL_VENTILATION		59	-0.39761883	-1.6096517	0.006802721	0.19175851	1.0	1443	tags=42%, list=19%, signal=52%
SPIELMAN_LYMPHOBLAST_EUROPEAN_VS_ASIAN_2FC_DN	SPIELMAN_LYMPHOBLAST_EUROPEAN_VS_ASIAN_2FC_DN		11	-0.60090935	-1.606052	0.042857144	0.19454902	1.0	815	tags=36%, list=11%, signal=41%
RUTELLA_RESPONSE_TO_HGF_VS_CSF2RB_AND_IL4_UP	RUTELLA_RESPONSE_TO_HGF_VS_CSF2RB_AND_IL4_UP		298	-0.3136986	-1.6055698	0.0	0.19370387	1.0	1368	tags=30%, list=18%, signal=35%
PID_S1P_S1P3_PATHWAY	PID_S1P_S1P3_PATHWAY		19	-0.513163	-1.6008259	0.01953125	0.19821349	1.0	1996	tags=53%, list=27%, signal=72%
HOELZEL_NF1_TARGETS_UP	HOELZEL_NF1_TARGETS_UP		70	-0.3773323	-1.5997466	0.0	0.19812508	1.0	569	tags=23%, list=8%, signal=25%
GALINDO_IMMUNE_RESPONSE_TO_ENTEROTOXIN	GALINDO_IMMUNE_RESPONSE_TO_ENTEROTOXIN		52	-0.39974627	-1.596915	0.02097902	0.200577	1.0	1230	tags=38%, list=17%, signal=46%
BOYLAN_MULTIPLE_MYELOMA_C_CLUSTER_DN	BOYLAN_MULTIPLE_MYELOMA_C_CLUSTER_DN		21	-0.5089704	-1.5969138	0.04761905	0.19922389	1.0	829	tags=48%, list=11%, signal=53%
VALK_AML_CLUSTER_5	VALK_AML_CLUSTER_5		17	-0.5107637	-1.5946689	0.05172414	0.2006474	1.0	958	tags=47%, list=13%, signal=54%
NADLER_OBESITY_UP	NADLER_OBESITY_UP		47	-0.40098792	-1.5903277	0.019480519	0.20464356	1.0	1046	tags=32%, list=14%, signal=37%
KEGG_GLYCEROLIPID_METABOLISM	KEGG_GLYCEROLIPID_METABOLISM		22	-0.47843373	-1.5891539	0.008510638	0.20482536	1.0	1591	tags=45%, list=21%, signal=58%
DIRMEIER_LMP1_RESPONSE_EARLY	DIRMEIER_LMP1_RESPONSE_EARLY		42	-0.41996962	-1.5886083	0.011494253	0.20415114	1.0	1180	tags=33%, list=16%, signal=39%
MCDOWELL_ACUTE_LUNG_INJURY_DN	MCDOWELL_ACUTE_LUNG_INJURY_DN		28	-0.4512657	-1.5866041	0.014084507	0.20531559	1.0	1260	tags=25%, list=17%, signal=30%
GARGALOVIC_RESPONSE_TO_OXIDIZED_PHOSPHOLIPIDS_TURQUOISE_UP	GARGALOVIC_RESPONSE_TO_OXIDIZED_PHOSPHOLIPIDS_TURQUOISE_UP		39	-0.42054293	-1.5865017	0.01754386	0.20404088	1.0	925	tags=36%, list=12%, signal=41%
BURTON_ADIPOGENESIS_1	BURTON_ADIPOGENESIS_1		28	-0.44684505	-1.5841166	0.0048076925	0.20565337	1.0	789	tags=36%, list=11%, signal=40%
REACTOME_NEURONAL_SYSTEM	REACTOME_NEURONAL_SYSTEM		112	-0.35200447	-1.5839924	0.0	0.20451175	1.0	751	tags=23%, list=10%, signal=25%
MEISSNER_NPC_HCP_WITH_H3K4ME2_AND_H3K27ME3	MEISSNER_NPC_HCP_WITH_H3K4ME2_AND_H3K27ME3		77	-0.36873668	-1.58359	0.0	0.2037265	1.0	1123	tags=43%, list=15%, signal=50%
NEWMAN_ERCC6_TARGETS_UP	NEWMAN_ERCC6_TARGETS_UP		14	-0.5361332	-1.579527	0.041198503	0.20759365	1.0	711	tags=43%, list=10%, signal=47%
SEKI_INFLAMMATORY_RESPONSE_LPS_UP	SEKI_INFLAMMATORY_RESPONSE_LPS_UP		34	-0.4341975	-1.5760199	0.019417476	0.2109982	1.0	1180	tags=41%, list=16%, signal=49%
MAEKAWA_ATF2_TARGETS	MAEKAWA_ATF2_TARGETS		11	-0.57509923	-1.5759002	0.05172414	0.2098575	1.0	132	tags=18%, list=2%, signal=18%
CAMPS_COLON_CANCER_COPY_NUMBER_DN	CAMPS_COLON_CANCER_COPY_NUMBER_DN		19	-0.5053893	-1.5745962	0.025210084	0.21039623	1.0	878	tags=37%, list=12%, signal=42%
REACTOME_HDL_MEDIATED_LIPID_TRANSPORT	REACTOME_HDL_MEDIATED_LIPID_TRANSPORT		11	-0.59112436	-1.5720063	0.046428572	0.21203491	1.0	1421	tags=73%, list=19%, signal=90%
YAGI_AML_FAB_MARKERS	YAGI_AML_FAB_MARKERS		139	-0.32335994	-1.569429	0.0	0.21379115	1.0	472	tags=17%, list=6%, signal=17%
ZHAN_MULTIPLE_MYELOMA_MS_UP	ZHAN_MULTIPLE_MYELOMA_MS_UP		24	-0.4541998	-1.5693765	0.03125	0.21257566	1.0	1103	tags=46%, list=15%, signal=54%
KANG_IMMORTALIZED_BY_TERT_DN	KANG_IMMORTALIZED_BY_TERT_DN		59	-0.3848065	-1.5692235	0.007246377	0.21147767	1.0	398	tags=19%, list=5%, signal=20%
BENPORATH_SUZ12_TARGETS	BENPORATH_SUZ12_TARGETS		278	-0.32100925	-1.5681727	0.0	0.21134442	1.0	988	tags=31%, list=13%, signal=35%
FRASOR_RESPONSE_TO_ESTRADIOL_DN	FRASOR_RESPONSE_TO_ESTRADIOL_DN		58	-0.38026935	-1.5667104	0.008064516	0.21176606	1.0	958	tags=29%, list=13%, signal=33%
SUH_COEXPRESSED_WITH_ID1_AND_ID2_UP	SUH_COEXPRESSED_WITH_ID1_AND_ID2_UP		13	-0.54976904	-1.5596726	0.025547445	0.21914087	1.0	1305	tags=54%, list=18%, signal=65%
LEIN_LOCALIZED_TO_PROXIMAL_DENDRITES	LEIN_LOCALIZED_TO_PROXIMAL_DENDRITES		23	-0.46590003	-1.5582108	0.023041476	0.21979773	1.0	1086	tags=39%, list=15%, signal=46%
JAATINEN_HEMATOPOIETIC_STEM_CELL_DN	JAATINEN_HEMATOPOIETIC_STEM_CELL_DN		102	-0.3493734	-1.5523764	0.0	0.22602114	1.0	1174	tags=39%, list=16%, signal=46%
BURTON_ADIPOGENESIS_8	BURTON_ADIPOGENESIS_8		58	-0.38256398	-1.5510052	0.007633588	0.22629972	1.0	1208	tags=36%, list=16%, signal=43%
KEGG_TYPE_I_DIABETES_MELLITUS	KEGG_TYPE_I_DIABETES_MELLITUS		21	-0.49485445	-1.5486751	0.029787235	0.22789988	1.0	1477	tags=57%, list=20%, signal=71%
REACTOME_CYTOCHROME_P450_ARRANGED_BY_SUBSTRATE_TYPE	REACTOME_CYTOCHROME_P450_ARRANGED_BY_SUBSTRATE_TYPE		18	-0.49905863	-1.5485688	0.012096774	0.22667576	1.0	1231	tags=50%, list=17%, signal=60%
DAZARD_UV_RESPONSE_CLUSTER_G28	DAZARD_UV_RESPONSE_CLUSTER_G28		13	-0.536292	-1.54815	0.03731343	0.22596268	1.0	1196	tags=54%, list=16%, signal=64%
LIAN_NEUTROPHIL_GRANULE_CONSTITUENTS	LIAN_NEUTROPHIL_GRANULE_CONSTITUENTS		10	-0.6068799	-1.5454906	0.05944056	0.2284845	1.0	931	tags=50%, list=13%, signal=57%
MIYAGAWA_TARGETS_OF_EWSR1_ETS_FUSIONS_DN	MIYAGAWA_TARGETS_OF_EWSR1_ETS_FUSIONS_DN		116	-0.33695802	-1.543763	0.0	0.22923754	1.0	809	tags=27%, list=11%, signal=30%
AMIT_EGF_RESPONSE_40_MCF10A	AMIT_EGF_RESPONSE_40_MCF10A		16	-0.5231101	-1.5416288	0.053497944	0.23073825	1.0	958	tags=50%, list=13%, signal=57%
CHEOK_RESPONSE_TO_HD_MTX_UP	CHEOK_RESPONSE_TO_HD_MTX_UP		12	-0.5521511	-1.5414926	0.056737587	0.22958922	1.0	606	tags=42%, list=8%, signal=45%
HUPER_BREAST_BASAL_VS_LUMINAL_UP	HUPER_BREAST_BASAL_VS_LUMINAL_UP		25	-0.44899663	-1.5388011	0.033175357	0.23226926	1.0	219	tags=24%, list=3%, signal=25%
BENPORATH_ES_WITH_H3K27ME3	BENPORATH_ES_WITH_H3K27ME3		294	-0.29599103	-1.538056	0.0	0.2320311	1.0	898	tags=27%, list=12%, signal=30%
PHONG_TNF_TARGETS_UP	PHONG_TNF_TARGETS_UP		38	-0.42085198	-1.5357873	0.016949153	0.23408964	1.0	1163	tags=39%, list=16%, signal=47%
ELVIDGE_HYPOXIA_UP	ELVIDGE_HYPOXIA_UP		132	-0.32631198	-1.5355413	0.0	0.23321614	1.0	936	tags=24%, list=13%, signal=27%
WENG_POR_TARGETS_LIVER_DN	WENG_POR_TARGETS_LIVER_DN		10	-0.6007426	-1.5338546	0.055555556	0.23448811	1.0	839	tags=40%, list=11%, signal=45%
MATZUK_SPERMATID_DIFFERENTIATION	MATZUK_SPERMATID_DIFFERENTIATION		15	-0.52576363	-1.5334871	0.068100356	0.23365235	1.0	1496	tags=53%, list=20%, signal=67%
OUYANG_PROSTATE_CANCER_PROGRESSION_UP	OUYANG_PROSTATE_CANCER_PROGRESSION_UP		13	-0.53903925	-1.5306265	0.05821918	0.236217	1.0	1892	tags=85%, list=25%, signal=113%
BROWN_MYELOID_CELL_DEVELOPMENT_UP	BROWN_MYELOID_CELL_DEVELOPMENT_UP		77	-0.35533056	-1.5301529	0.018181818	0.23546904	1.0	1004	tags=26%, list=13%, signal=30%
MEISSNER_NPC_HCP_WITH_H3K4ME2	MEISSNER_NPC_HCP_WITH_H3K4ME2		160	-0.32076782	-1.5283884	0.0	0.23659886	1.0	1067	tags=32%, list=14%, signal=36%
LINDGREN_BLADDER_CANCER_CLUSTER_2A_DN	LINDGREN_BLADDER_CANCER_CLUSTER_2A_DN		88	-0.34512213	-1.52579	0.008474576	0.23876289	1.0	659	tags=17%, list=9%, signal=18%
LI_INDUCED_T_TO_NATURAL_KILLER_UP	LI_INDUCED_T_TO_NATURAL_KILLER_UP		140	-0.33514333	-1.5251836	0.0	0.23830049	1.0	1079	tags=31%, list=15%, signal=36%
CHANDRAN_METASTASIS_DN	CHANDRAN_METASTASIS_DN		120	-0.3335322	-1.5219074	0.0	0.24172813	1.0	982	tags=28%, list=13%, signal=32%
MIKKELSEN_MEF_LCP_WITH_H3K4ME3	MIKKELSEN_MEF_LCP_WITH_H3K4ME3		50	-0.39630473	-1.5214357	0.02962963	0.24097724	1.0	1338	tags=40%, list=18%, signal=48%
CHUANG_OXIDATIVE_STRESS_RESPONSE_UP	CHUANG_OXIDATIVE_STRESS_RESPONSE_UP		17	-0.50090367	-1.5211972	0.03265306	0.24003623	1.0	922	tags=47%, list=12%, signal=54%
WEST_ADRENOCORTICAL_CARCINOMA_VS_ADENOMA_DN	WEST_ADRENOCORTICAL_CARCINOMA_VS_ADENOMA_DN		18	-0.4953199	-1.5191617	0.044715445	0.24141295	1.0	667	tags=28%, list=9%, signal=30%
KAMIKUBO_MYELOID_CEBPA_NETWORK	KAMIKUBO_MYELOID_CEBPA_NETWORK		12	-0.55800647	-1.5191088	0.08163265	0.24021685	1.0	559	tags=33%, list=8%, signal=36%
SHAFFER_IRF4_TARGETS_IN_PLASMA_CELL_VS_MATURE_B_LYMPHOCYTE	SHAFFER_IRF4_TARGETS_IN_PLASMA_CELL_VS_MATURE_B_LYMPHOCYTE		49	-0.39054057	-1.5189689	0.021582734	0.23912095	1.0	1427	tags=37%, list=19%, signal=45%
CREIGHTON_AKT1_SIGNALING_VIA_MTOR_DN	CREIGHTON_AKT1_SIGNALING_VIA_MTOR_DN		19	-0.4820717	-1.5185083	0.046692606	0.23843333	1.0	1239	tags=47%, list=17%, signal=57%
KIM_RESPONSE_TO_TSA_AND_DECITABINE_UP	KIM_RESPONSE_TO_TSA_AND_DECITABINE_UP		65	-0.35773373	-1.516802	0.008695652	0.23955634	1.0	666	tags=26%, list=9%, signal=28%
WIERENGA_STAT5A_TARGETS_DN	WIERENGA_STAT5A_TARGETS_DN		92	-0.34468314	-1.5151365	0.0	0.24053061	1.0	628	tags=25%, list=8%, signal=27%
BOYAULT_LIVER_CANCER_SUBCLASS_G2	BOYAULT_LIVER_CANCER_SUBCLASS_G2		21	-0.4607532	-1.5148064	0.045833334	0.23965654	1.0	556	tags=29%, list=7%, signal=31%
PARK_TRETINOIN_RESPONSE_AND_PML_RARA_FUSION	PARK_TRETINOIN_RESPONSE_AND_PML_RARA_FUSION		17	-0.5075818	-1.5138503	0.044715445	0.23973142	1.0	1338	tags=47%, list=18%, signal=57%
ADDYA_ERYTHROID_DIFFERENTIATION_BY_HEMIN	ADDYA_ERYTHROID_DIFFERENTIATION_BY_HEMIN		54	-0.3766604	-1.5124943	0.025316456	0.24034823	1.0	727	tags=30%, list=10%, signal=33%
BIOCARTA_ACTINY_PATHWAY	BIOCARTA_ACTINY_PATHWAY		15	-0.51593137	-1.5114838	0.045454547	0.24044277	1.0	1976	tags=60%, list=27%, signal=82%
LEE_BMP2_TARGETS_UP	LEE_BMP2_TARGETS_UP		364	-0.2910146	-1.5092251	0.0	0.24237211	1.0	786	tags=23%, list=11%, signal=24%
KAMIKUBO_MYELOID_MN1_NETWORK	KAMIKUBO_MYELOID_MN1_NETWORK		13	-0.5386552	-1.5091838	0.0528169	0.24126239	1.0	429	tags=31%, list=6%, signal=33%
VECCHI_GASTRIC_CANCER_EARLY_DN	VECCHI_GASTRIC_CANCER_EARLY_DN		150	-0.31935415	-1.5078471	0.0	0.24183726	1.0	976	tags=27%, list=13%, signal=31%
NIELSEN_GIST_AND_SYNOVIAL_SARCOMA_DN	NIELSEN_GIST_AND_SYNOVIAL_SARCOMA_DN		14	-0.528156	-1.5048898	0.075187966	0.24442498	1.0	788	tags=43%, list=11%, signal=48%
ZHANG_TLX_TARGETS_60HR_UP	ZHANG_TLX_TARGETS_60HR_UP		183	-0.30505767	-1.504668	0.0	0.24350947	1.0	1004	tags=26%, list=13%, signal=30%
ZHAN_V1_LATE_DIFFERENTIATION_GENES_UP	ZHAN_V1_LATE_DIFFERENTIATION_GENES_UP		29	-0.43086103	-1.499764	0.028846154	0.24882697	1.0	1024	tags=34%, list=14%, signal=40%
REACTOME_PHASE1_FUNCTIONALIZATION_OF_COMPOUNDS	REACTOME_PHASE1_FUNCTIONALIZATION_OF_COMPOUNDS		29	-0.4333539	-1.4997545	0.03	0.24765573	1.0	1231	tags=45%, list=17%, signal=54%
DELPUECH_FOXO3_TARGETS_UP	DELPUECH_FOXO3_TARGETS_UP		47	-0.3893769	-1.4994398	0.036764707	0.24685836	1.0	723	tags=28%, list=10%, signal=30%
LEE_NEURAL_CREST_STEM_CELL_DN	LEE_NEURAL_CREST_STEM_CELL_DN		72	-0.35442245	-1.499397	0.0088495575	0.24576543	1.0	519	tags=26%, list=7%, signal=28%
CHIANG_LIVER_CANCER_SUBCLASS_POLYSOMY7_DN	CHIANG_LIVER_CANCER_SUBCLASS_POLYSOMY7_DN		14	-0.53365177	-1.4967011	0.07	0.24842466	1.0	559	tags=36%, list=8%, signal=39%
MARTENS_TRETINOIN_RESPONSE_UP	MARTENS_TRETINOIN_RESPONSE_UP		187	-0.30737776	-1.4963613	0.0	0.24779844	1.0	1136	tags=30%, list=15%, signal=35%
ELVIDGE_HIF1A_TARGETS_DN	ELVIDGE_HIF1A_TARGETS_DN		69	-0.35542205	-1.4957693	0.020618556	0.24747792	1.0	926	tags=26%, list=12%, signal=30%
FLECHNER_BIOPSY_KIDNEY_TRANSPLANT_REJECTED_VS_OK_UP	FLECHNER_BIOPSY_KIDNEY_TRANSPLANT_REJECTED_VS_OK_UP		67	-0.3568442	-1.4950942	0.0	0.24721226	1.0	670	tags=22%, list=9%, signal=24%
TONKS_TARGETS_OF_RUNX1_RUNX1T1_FUSION_MONOCYTE_DN	TONKS_TARGETS_OF_RUNX1_RUNX1T1_FUSION_MONOCYTE_DN		32	-0.416272	-1.490283	0.053475935	0.2529537	1.0	501	tags=25%, list=7%, signal=27%
LANDIS_ERBB2_BREAST_TUMORS_65_UP	LANDIS_ERBB2_BREAST_TUMORS_65_UP		15	-0.5005813	-1.4891267	0.064150944	0.25342256	1.0	1488	tags=40%, list=20%, signal=50%
LU_TUMOR_VASCULATURE_UP	LU_TUMOR_VASCULATURE_UP		20	-0.467945	-1.4855895	0.07114624	0.25677806	1.0	384	tags=25%, list=5%, signal=26%
WUNDER_INFLAMMATORY_RESPONSE_AND_CHOLESTEROL_UP	WUNDER_INFLAMMATORY_RESPONSE_AND_CHOLESTEROL_UP		31	-0.41817737	-1.4847655	0.0456621	0.25687042	1.0	949	tags=32%, list=13%, signal=37%
THEILGAARD_NEUTROPHIL_AT_SKIN_WOUND_UP	THEILGAARD_NEUTROPHIL_AT_SKIN_WOUND_UP		55	-0.37207857	-1.4847143	0.0	0.25575233	1.0	1107	tags=31%, list=15%, signal=36%
LINDSTEDT_DENDRITIC_CELL_MATURATION_A	LINDSTEDT_DENDRITIC_CELL_MATURATION_A		36	-0.4054546	-1.4844719	0.035897437	0.25495005	1.0	1197	tags=36%, list=16%, signal=43%
REACTOME_RESPONSE_TO_ELEVATED_PLATELET_CYTOSOLIC_CA2_	REACTOME_RESPONSE_TO_ELEVATED_PLATELET_CYTOSOLIC_CA2_		59	-0.3577992	-1.4842821	0.007518797	0.25399804	1.0	1503	tags=41%, list=20%, signal=51%
VERRECCHIA_EARLY_RESPONSE_TO_TGFB1	VERRECCHIA_EARLY_RESPONSE_TO_TGFB1		44	-0.3731416	-1.4794965	0.02366864	0.25923347	1.0	824	tags=30%, list=11%, signal=33%
SHI_SPARC_TARGETS_UP	SHI_SPARC_TARGETS_UP		12	-0.526499	-1.4788965	0.078431375	0.2588771	1.0	1503	tags=67%, list=20%, signal=83%
BOYAULT_LIVER_CANCER_SUBCLASS_G56_DN	BOYAULT_LIVER_CANCER_SUBCLASS_G56_DN		12	-0.5504263	-1.4786894	0.08041958	0.25799602	1.0	807	tags=42%, list=11%, signal=47%
BOYLAN_MULTIPLE_MYELOMA_C_D_DN	BOYLAN_MULTIPLE_MYELOMA_C_D_DN		101	-0.32976782	-1.4770533	0.01369863	0.25925654	1.0	1039	tags=30%, list=14%, signal=34%
NAGASHIMA_NRG1_SIGNALING_UP	NAGASHIMA_NRG1_SIGNALING_UP		129	-0.31136343	-1.4764792	0.0	0.2589014	1.0	574	tags=22%, list=8%, signal=24%
SESTO_RESPONSE_TO_UV_C3	SESTO_RESPONSE_TO_UV_C3		16	-0.502984	-1.4728574	0.06985294	0.26260146	1.0	487	tags=38%, list=7%, signal=40%
ZHANG_RESPONSE_TO_IKK_INHIBITOR_AND_TNF_UP	ZHANG_RESPONSE_TO_IKK_INHIBITOR_AND_TNF_UP		95	-0.32587767	-1.471872	0.0	0.26280263	1.0	1163	tags=34%, list=16%, signal=39%
REACTOME_DARPP_32_EVENTS	REACTOME_DARPP_32_EVENTS		17	-0.48009863	-1.4709917	0.057692308	0.26300192	1.0	775	tags=29%, list=10%, signal=33%
GHANDHI_DIRECT_IRRADIATION_UP	GHANDHI_DIRECT_IRRADIATION_UP		44	-0.3818415	-1.4707899	0.017857144	0.2620926	1.0	1196	tags=30%, list=16%, signal=35%
MODY_HIPPOCAMPUS_POSTNATAL	MODY_HIPPOCAMPUS_POSTNATAL		43	-0.38007882	-1.4699395	0.016304348	0.26204163	1.0	1880	tags=49%, list=25%, signal=65%
PID_EPHRINBREVPATHWAY	PID_EPHRINBREVPATHWAY		22	-0.46977633	-1.4686505	0.055555556	0.2627796	1.0	1113	tags=55%, list=15%, signal=64%
ARACNE_NTRK1-NETWORK	ARACNE_NTRK1-NETWORK		53	-0.36853096	-1.467749	0.014925373	0.26285914	1.0	1567	tags=42%, list=21%, signal=52%
KEGG_NEUROACTIVE_LIGAND_RECEPTOR_INTERACTION	KEGG_NEUROACTIVE_LIGAND_RECEPTOR_INTERACTION		58	-0.37694114	-1.467694	0.009090909	0.26178664	1.0	1104	tags=40%, list=15%, signal=46%
ACEVEDO_LIVER_TUMOR_VS_NORMAL_ADJACENT_TISSUE_DN	ACEVEDO_LIVER_TUMOR_VS_NORMAL_ADJACENT_TISSUE_DN		148	-0.30890995	-1.4662536	0.0	0.26297203	1.0	1109	tags=29%, list=15%, signal=33%
PID_UPA_UPAR_PATHWAY	PID_UPA_UPAR_PATHWAY		23	-0.43802926	-1.4648724	0.05907173	0.26398355	1.0	1117	tags=39%, list=15%, signal=46%
PID_AMB2_NEUTROPHILS_PATHWAY	PID_AMB2_NEUTROPHILS_PATHWAY		24	-0.43356884	-1.4648567	0.060465116	0.26287705	1.0	788	tags=38%, list=11%, signal=42%
ELVIDGE_HIF1A_AND_HIF2A_TARGETS_DN	ELVIDGE_HIF1A_AND_HIF2A_TARGETS_DN		78	-0.33976606	-1.4635934	0.0	0.26347098	1.0	926	tags=24%, list=12%, signal=28%
ICHIBA_GRAFT_VERSUS_HOST_DISEASE_D7_UP	ICHIBA_GRAFT_VERSUS_HOST_DISEASE_D7_UP		64	-0.354633	-1.4635253	0.015151516	0.26246852	1.0	1008	tags=33%, list=14%, signal=38%
ROSS_AML_WITH_AML1_ETO_FUSION	ROSS_AML_WITH_AML1_ETO_FUSION		43	-0.38366532	-1.462416	0.023529412	0.26303318	1.0	1568	tags=42%, list=21%, signal=53%
REACTOME_TRANSFERRIN_ENDOCYTOSIS_AND_RECYCLING	REACTOME_TRANSFERRIN_ENDOCYTOSIS_AND_RECYCLING		17	-0.49522522	-1.4622118	0.07725322	0.26215017	1.0	1833	tags=59%, list=25%, signal=78%
TERAMOTO_OPN_TARGETS_CLUSTER_7	TERAMOTO_OPN_TARGETS_CLUSTER_7		12	-0.54013956	-1.4613448	0.066176474	0.26220214	1.0	793	tags=33%, list=11%, signal=37%
PEDRIOLI_MIR31_TARGETS_DN	PEDRIOLI_MIR31_TARGETS_DN		163	-0.3006353	-1.4555212	0.0	0.26982835	1.0	1077	tags=28%, list=14%, signal=32%
CERVERA_SDHB_TARGETS_1_DN	CERVERA_SDHB_TARGETS_1_DN		20	-0.46638703	-1.4554304	0.065789476	0.2688423	1.0	239	tags=25%, list=3%, signal=26%
MORI_LARGE_PRE_BII_LYMPHOCYTE_DN	MORI_LARGE_PRE_BII_LYMPHOCYTE_DN		34	-0.3994859	-1.4546885	0.044444446	0.268669	1.0	958	tags=29%, list=13%, signal=34%
BRUECKNER_TARGETS_OF_MIRLET7A3_UP	BRUECKNER_TARGETS_OF_MIRLET7A3_UP		66	-0.34054005	-1.454068	0.00952381	0.26846004	1.0	1199	tags=27%, list=16%, signal=32%
MARCHINI_TRABECTEDIN_RESISTANCE_UP	MARCHINI_TRABECTEDIN_RESISTANCE_UP		15	-0.4912383	-1.4514185	0.091254756	0.27122247	1.0	684	tags=27%, list=9%, signal=29%
HUMMERICH_SKIN_CANCER_PROGRESSION_UP	HUMMERICH_SKIN_CANCER_PROGRESSION_UP		61	-0.3562129	-1.450967	0.03125	0.27084363	1.0	1370	tags=38%, list=18%, signal=46%
REACTOME_AMINO_ACID_SYNTHESIS_AND_INTERCONVERSION_TRANSAMINATION	REACTOME_AMINO_ACID_SYNTHESIS_AND_INTERCONVERSION_TRANSAMINATION		10	-0.55501384	-1.4469525	0.10060976	0.275404	1.0	1493	tags=40%, list=20%, signal=50%
ACEVEDO_LIVER_CANCER_WITH_H3K27ME3_UP	ACEVEDO_LIVER_CANCER_WITH_H3K27ME3_UP		84	-0.3342418	-1.4463955	0.021052632	0.27507582	1.0	778	tags=25%, list=10%, signal=28%
SCHAEFFER_PROSTATE_DEVELOPMENT_48HR_DN	SCHAEFFER_PROSTATE_DEVELOPMENT_48HR_DN		182	-0.29371166	-1.4462733	0.0	0.27411216	1.0	938	tags=24%, list=13%, signal=27%
NIKOLSKY_BREAST_CANCER_8Q12_Q22_AMPLICON	NIKOLSKY_BREAST_CANCER_8Q12_Q22_AMPLICON		58	-0.34907946	-1.4446597	0.030303031	0.27528766	1.0	452	tags=16%, list=6%, signal=16%
CROONQUIST_NRAS_VS_STROMAL_STIMULATION_UP	CROONQUIST_NRAS_VS_STROMAL_STIMULATION_UP		21	-0.4604482	-1.4445957	0.07234043	0.27426702	1.0	71	tags=14%, list=1%, signal=14%
LIU_VAV3_PROSTATE_CARCINOGENESIS_UP	LIU_VAV3_PROSTATE_CARCINOGENESIS_UP		50	-0.37065703	-1.443835	0.006289308	0.27419478	1.0	815	tags=36%, list=11%, signal=40%
REACTOME_GLYCOSPHINGOLIPID_METABOLISM	REACTOME_GLYCOSPHINGOLIPID_METABOLISM		15	-0.4976838	-1.4422706	0.093877554	0.27513433	1.0	1675	tags=60%, list=23%, signal=77%
OSWALD_HEMATOPOIETIC_STEM_CELL_IN_COLLAGEN_GEL_UP	OSWALD_HEMATOPOIETIC_STEM_CELL_IN_COLLAGEN_GEL_UP		156	-0.29268497	-1.4414197	0.0	0.2751618	1.0	540	tags=19%, list=7%, signal=20%
SCHAEFFER_PROSTATE_DEVELOPMENT_48HR_UP	SCHAEFFER_PROSTATE_DEVELOPMENT_48HR_UP		199	-0.2932544	-1.4398352	0.0	0.27651548	1.0	1431	tags=35%, list=19%, signal=42%
GAZDA_DIAMOND_BLACKFAN_ANEMIA_MYELOID_UP	GAZDA_DIAMOND_BLACKFAN_ANEMIA_MYELOID_UP		20	-0.45699513	-1.4378564	0.06692913	0.2780069	1.0	383	tags=25%, list=5%, signal=26%
WEINMANN_ADAPTATION_TO_HYPOXIA_DN	WEINMANN_ADAPTATION_TO_HYPOXIA_DN		32	-0.40809917	-1.4359351	0.04	0.27986488	1.0	386	tags=22%, list=5%, signal=23%
WACKER_HYPOXIA_TARGETS_OF_VHL	WACKER_HYPOXIA_TARGETS_OF_VHL		11	-0.5189021	-1.4352139	0.08	0.27992636	1.0	59	tags=18%, list=1%, signal=18%
TAVOR_CEBPA_TARGETS_UP	TAVOR_CEBPA_TARGETS_UP		38	-0.38178375	-1.4323834	0.059880238	0.28312334	1.0	924	tags=26%, list=12%, signal=30%
KEGG_HEMATOPOIETIC_CELL_LINEAGE	KEGG_HEMATOPOIETIC_CELL_LINEAGE		26	-0.42211562	-1.4323092	0.055793993	0.28216106	1.0	1230	tags=46%, list=17%, signal=55%
GAZDA_DIAMOND_BLACKFAN_ANEMIA_PROGENITOR_UP	GAZDA_DIAMOND_BLACKFAN_ANEMIA_PROGENITOR_UP		35	-0.3938168	-1.4299341	0.044554457	0.2847975	1.0	741	tags=34%, list=10%, signal=38%
MCBRYAN_PUBERTAL_BREAST_5_6WK_UP	MCBRYAN_PUBERTAL_BREAST_5_6WK_UP		55	-0.35720545	-1.4288145	0.027027028	0.28531152	1.0	646	tags=25%, list=9%, signal=28%
NAKAYAMA_SOFT_TISSUE_TUMORS_PCA2_DN	NAKAYAMA_SOFT_TISSUE_TUMORS_PCA2_DN		49	-0.35609493	-1.4276232	0.012345679	0.28617656	1.0	1027	tags=29%, list=14%, signal=33%
CHEBOTAEV_GR_TARGETS_DN	CHEBOTAEV_GR_TARGETS_DN		48	-0.36574826	-1.4261385	0.03311258	0.28735426	1.0	960	tags=33%, list=13%, signal=38%
LIU_LIVER_CANCER	LIU_LIVER_CANCER		15	-0.5013478	-1.4245391	0.09375	0.28875417	1.0	1260	tags=47%, list=17%, signal=56%
POOLA_INVASIVE_BREAST_CANCER_DN	POOLA_INVASIVE_BREAST_CANCER_DN		78	-0.32515627	-1.4240689	0.028037382	0.28846613	1.0	982	tags=35%, list=13%, signal=39%
REACTOME_AMINO_ACID_AND_OLIGOPEPTIDE_SLC_TRANSPORTERS	REACTOME_AMINO_ACID_AND_OLIGOPEPTIDE_SLC_TRANSPORTERS		15	-0.47672385	-1.4222773	0.08856089	0.29030305	1.0	932	tags=40%, list=13%, signal=46%
LU_TUMOR_ENDOTHELIAL_MARKERS_UP	LU_TUMOR_ENDOTHELIAL_MARKERS_UP		16	-0.47164088	-1.4216878	0.08627451	0.29009756	1.0	384	tags=25%, list=5%, signal=26%
DOANE_BREAST_CANCER_ESR1_DN	DOANE_BREAST_CANCER_ESR1_DN		19	-0.46696767	-1.4202546	0.08949416	0.29113805	1.0	219	tags=26%, list=3%, signal=27%
HASINA_NOL7_TARGETS_UP	HASINA_NOL7_TARGETS_UP		11	-0.5286839	-1.4174653	0.11235955	0.29448393	1.0	1053	tags=36%, list=14%, signal=42%
ONDER_CDH1_TARGETS_3_UP	ONDER_CDH1_TARGETS_3_UP		13	-0.48818722	-1.4171038	0.09541985	0.29407087	1.0	1238	tags=46%, list=17%, signal=55%
BILD_HRAS_ONCOGENIC_SIGNATURE	BILD_HRAS_ONCOGENIC_SIGNATURE		141	-0.3088227	-1.4152573	0.0	0.29588327	1.0	1022	tags=27%, list=14%, signal=31%
PID_S1P_S1P2_PATHWAY	PID_S1P_S1P2_PATHWAY		17	-0.46613896	-1.4147952	0.084337346	0.29549515	1.0	2173	tags=59%, list=29%, signal=83%
BOYLAN_MULTIPLE_MYELOMA_PCA1_UP	BOYLAN_MULTIPLE_MYELOMA_PCA1_UP		38	-0.3656414	-1.4144274	0.037837837	0.29497242	1.0	716	tags=24%, list=10%, signal=26%
MAHADEVAN_RESPONSE_TO_MP470_DN	MAHADEVAN_RESPONSE_TO_MP470_DN		17	-0.46373108	-1.4141586	0.103846155	0.29432863	1.0	793	tags=35%, list=11%, signal=39%
PID_INTEGRIN_A9B1_PATHWAY	PID_INTEGRIN_A9B1_PATHWAY		12	-0.5051145	-1.4140246	0.08695652	0.29349688	1.0	1370	tags=58%, list=18%, signal=71%
YAMASHITA_LIVER_CANCER_STEM_CELL_DN	YAMASHITA_LIVER_CANCER_STEM_CELL_DN		45	-0.36407804	-1.4131122	0.06832298	0.29373798	1.0	1392	tags=33%, list=19%, signal=41%
GALE_APL_WITH_FLT3_MUTATED_DN	GALE_APL_WITH_FLT3_MUTATED_DN		13	-0.51321274	-1.4119422	0.13409962	0.29443976	1.0	2048	tags=62%, list=28%, signal=85%
KEGG_BIOSYNTHESIS_OF_UNSATURATED_FATTY_ACIDS	KEGG_BIOSYNTHESIS_OF_UNSATURATED_FATTY_ACIDS		10	-0.54681623	-1.4118731	0.08802817	0.2934966	1.0	13	tags=10%, list=0%, signal=10%
MCBRYAN_PUBERTAL_BREAST_3_4WK_UP	MCBRYAN_PUBERTAL_BREAST_3_4WK_UP		104	-0.3226731	-1.4117777	0.014285714	0.29265147	1.0	1231	tags=34%, list=17%, signal=40%
OHGUCHI_LIVER_HNF4A_TARGETS_UP	OHGUCHI_LIVER_HNF4A_TARGETS_UP		17	-0.46701273	-1.4100392	0.10288066	0.2943739	1.0	220	tags=18%, list=3%, signal=18%
IIZUKA_LIVER_CANCER_PROGRESSION_L0_L1_DN	IIZUKA_LIVER_CANCER_PROGRESSION_L0_L1_DN		19	-0.44317883	-1.4088434	0.06225681	0.2949842	1.0	708	tags=26%, list=10%, signal=29%
MORI_IMMATURE_B_LYMPHOCYTE_UP	MORI_IMMATURE_B_LYMPHOCYTE_UP		30	-0.39647976	-1.4076215	0.03076923	0.29573795	1.0	670	tags=30%, list=9%, signal=33%
GAJATE_RESPONSE_TO_TRABECTEDIN_UP	GAJATE_RESPONSE_TO_TRABECTEDIN_UP		52	-0.3476505	-1.4063902	0.07236842	0.29656544	1.0	1024	tags=31%, list=14%, signal=35%
SHEN_SMARCA2_TARGETS_DN	SHEN_SMARCA2_TARGETS_DN		116	-0.30912757	-1.4041785	0.0121951215	0.2987557	1.0	1113	tags=37%, list=15%, signal=43%
PID_P75NTRPATHWAY	PID_P75NTRPATHWAY		42	-0.36992896	-1.4041419	0.028089888	0.2977893	1.0	940	tags=33%, list=13%, signal=38%
ROSS_AML_WITH_CBFB_MYH11_FUSION	ROSS_AML_WITH_CBFB_MYH11_FUSION		28	-0.41354257	-1.4029402	0.06465517	0.2986202	1.0	285	tags=18%, list=4%, signal=18%
SHIPP_DLBCL_VS_FOLLICULAR_LYMPHOMA_DN	SHIPP_DLBCL_VS_FOLLICULAR_LYMPHOMA_DN		28	-0.41343084	-1.4027717	0.05909091	0.29788694	1.0	915	tags=32%, list=12%, signal=37%
REACTOME_AMINO_ACID_TRANSPORT_ACROSS_THE_PLASMA_MEMBRANE	REACTOME_AMINO_ACID_TRANSPORT_ACROSS_THE_PLASMA_MEMBRANE		12	-0.5004745	-1.4024377	0.09665427	0.29736808	1.0	739	tags=33%, list=10%, signal=37%
FEVR_CTNNB1_TARGETS_UP	FEVR_CTNNB1_TARGETS_UP		329	-0.26711193	-1.401224	0.0	0.2982432	1.0	1081	tags=26%, list=15%, signal=29%
GUENTHER_GROWTH_SPHERICAL_VS_ADHERENT_DN	GUENTHER_GROWTH_SPHERICAL_VS_ADHERENT_DN		22	-0.43542033	-1.4012079	0.06910569	0.2972313	1.0	1157	tags=27%, list=16%, signal=32%
GRAHAM_CML_DIVIDING_VS_NORMAL_QUIESCENT_DN	GRAHAM_CML_DIVIDING_VS_NORMAL_QUIESCENT_DN		65	-0.34319493	-1.3995764	0.030534351	0.29865912	1.0	530	tags=17%, list=7%, signal=18%
FIGUEROA_AML_METHYLATION_CLUSTER_5_DN	FIGUEROA_AML_METHYLATION_CLUSTER_5_DN		18	-0.46263847	-1.3982735	0.1124498	0.2995755	1.0	1189	tags=44%, list=16%, signal=53%
PID_NECTIN_PATHWAY	PID_NECTIN_PATHWAY		18	-0.44870734	-1.3972558	0.10683761	0.30014032	1.0	940	tags=33%, list=13%, signal=38%
OSADA_ASCL1_TARGETS_DN	OSADA_ASCL1_TARGETS_DN		15	-0.48807004	-1.3967339	0.09328358	0.29986435	1.0	1336	tags=47%, list=18%, signal=57%
PID_GLYPICAN_1PATHWAY	PID_GLYPICAN_1PATHWAY		16	-0.462906	-1.3952131	0.10227273	0.30094945	1.0	726	tags=38%, list=10%, signal=41%
PID_SYNDECAN_2_PATHWAY	PID_SYNDECAN_2_PATHWAY		23	-0.4151468	-1.3929677	0.10382514	0.30320647	1.0	293	tags=17%, list=4%, signal=18%
YIH_RESPONSE_TO_ARSENITE_C4	YIH_RESPONSE_TO_ARSENITE_C4		14	-0.4783408	-1.3924445	0.0927835	0.30294806	1.0	1277	tags=57%, list=17%, signal=69%
KEGG_AUTOIMMUNE_THYROID_DISEASE	KEGG_AUTOIMMUNE_THYROID_DISEASE		18	-0.4529748	-1.390476	0.09465021	0.30472153	1.0	1477	tags=61%, list=20%, signal=76%
THUM_SYSTOLIC_HEART_FAILURE_UP	THUM_SYSTOLIC_HEART_FAILURE_UP		250	-0.2637804	-1.3904176	0.0	0.303827	1.0	956	tags=21%, list=13%, signal=24%
DUNNE_TARGETS_OF_AML1_MTG8_FUSION_DN	DUNNE_TARGETS_OF_AML1_MTG8_FUSION_DN		14	-0.48291895	-1.3900232	0.101167314	0.30334085	1.0	2	tags=7%, list=0%, signal=7%
TAKEDA_TARGETS_OF_NUP98_HOXA9_FUSION_6HR_UP	TAKEDA_TARGETS_OF_NUP98_HOXA9_FUSION_6HR_UP		31	-0.38974458	-1.3898331	0.09313726	0.3026538	1.0	659	tags=26%, list=9%, signal=28%
REACTOME_TRANSPORT_OF_INORGANIC_CATIONS_ANIONS_AND_AMINO_ACIDS_OLIGOPEPTIDES	REACTOME_TRANSPORT_OF_INORGANIC_CATIONS_ANIONS_AND_AMINO_ACIDS_OLIGOPEPTIDES		23	-0.42414218	-1.3859485	0.09865471	0.3079756	1.0	932	tags=30%, list=13%, signal=35%
ZHOU_INFLAMMATORY_RESPONSE_FIMA_UP	ZHOU_INFLAMMATORY_RESPONSE_FIMA_UP		180	-0.28188622	-1.3844253	0.0	0.3091749	1.0	847	tags=25%, list=11%, signal=28%
REACTOME_LATENT_INFECTION_OF_HOMO_SAPIENS_WITH_MYCOBACTERIUM_TUBERCULOSIS	REACTOME_LATENT_INFECTION_OF_HOMO_SAPIENS_WITH_MYCOBACTERIUM_TUBERCULOSIS		15	-0.47797063	-1.3838946	0.11494253	0.30899414	1.0	1833	tags=60%, list=25%, signal=79%
LEE_LIVER_CANCER_DENA_DN	LEE_LIVER_CANCER_DENA_DN		34	-0.3759758	-1.3811661	0.07614213	0.31209844	1.0	1136	tags=29%, list=15%, signal=35%
SWEET_KRAS_TARGETS_UP	SWEET_KRAS_TARGETS_UP		66	-0.32763925	-1.3801961	0.04918033	0.31251025	1.0	784	tags=32%, list=11%, signal=35%
VECCHI_GASTRIC_CANCER_ADVANCED_VS_EARLY_UP	VECCHI_GASTRIC_CANCER_ADVANCED_VS_EARLY_UP		93	-0.30390966	-1.3799208	0.012048192	0.311925	1.0	809	tags=28%, list=11%, signal=31%
ONDER_CDH1_TARGETS_1_UP	ONDER_CDH1_TARGETS_1_UP		94	-0.30734596	-1.3796253	0.0	0.3113065	1.0	1038	tags=30%, list=14%, signal=34%
LEE_LIVER_CANCER_ACOX1_DN	LEE_LIVER_CANCER_ACOX1_DN		32	-0.38622767	-1.3757545	0.0625	0.31662065	1.0	567	tags=22%, list=8%, signal=24%
LU_IL4_SIGNALING	LU_IL4_SIGNALING		47	-0.35567456	-1.3728528	0.039473683	0.32042456	1.0	272	tags=15%, list=4%, signal=15%
ELVIDGE_HYPOXIA_BY_DMOG_UP	ELVIDGE_HYPOXIA_BY_DMOG_UP		102	-0.30745497	-1.3714184	0.015625	0.32180193	1.0	936	tags=25%, list=13%, signal=28%
DELYS_THYROID_CANCER_UP	DELYS_THYROID_CANCER_UP		263	-0.2664595	-1.3696642	0.0	0.3233597	1.0	992	tags=28%, list=13%, signal=31%
PARK_TRETINOIN_RESPONSE_AND_RARA_PLZF_FUSION	PARK_TRETINOIN_RESPONSE_AND_RARA_PLZF_FUSION		11	-0.51380616	-1.3689457	0.12460064	0.32345667	1.0	806	tags=36%, list=11%, signal=41%
BENPORATH_EED_TARGETS	BENPORATH_EED_TARGETS		296	-0.2653748	-1.3673098	0.0	0.3251327	1.0	833	tags=25%, list=11%, signal=27%
BIOCARTA_CHREBP2_PATHWAY	BIOCARTA_CHREBP2_PATHWAY		27	-0.41501975	-1.3662957	0.0776699	0.3256551	1.0	775	tags=22%, list=10%, signal=25%
TORCHIA_TARGETS_OF_EWSR1_FLI1_FUSION_UP	TORCHIA_TARGETS_OF_EWSR1_FLI1_FUSION_UP		118	-0.3042693	-1.3628486	0.01754386	0.32997438	1.0	1102	tags=30%, list=15%, signal=34%
REACTOME_BIOLOGICAL_OXIDATIONS	REACTOME_BIOLOGICAL_OXIDATIONS		60	-0.33288342	-1.3623353	0.055555556	0.32983255	1.0	1231	tags=35%, list=17%, signal=42%
DAZARD_UV_RESPONSE_CLUSTER_G24	DAZARD_UV_RESPONSE_CLUSTER_G24		18	-0.44804674	-1.3622005	0.11297071	0.32902837	1.0	1111	tags=33%, list=15%, signal=39%
JISON_SICKLE_CELL_DISEASE_UP	JISON_SICKLE_CELL_DISEASE_UP		132	-0.2827616	-1.3619263	0.013888889	0.32841823	1.0	1515	tags=35%, list=20%, signal=43%
KEGG_ANTIGEN_PROCESSING_AND_PRESENTATION	KEGG_ANTIGEN_PROCESSING_AND_PRESENTATION		42	-0.35540298	-1.3609177	0.05882353	0.32898378	1.0	1360	tags=38%, list=18%, signal=46%
BIOCARTA_IL10_PATHWAY	BIOCARTA_IL10_PATHWAY		10	-0.5348529	-1.3585311	0.13265306	0.3315221	1.0	670	tags=30%, list=9%, signal=33%
GAUSSMANN_MLL_AF4_FUSION_TARGETS_E_DN	GAUSSMANN_MLL_AF4_FUSION_TARGETS_E_DN		11	-0.49665356	-1.3584511	0.13245033	0.33063966	1.0	255	tags=36%, list=3%, signal=38%
MIKKELSEN_NPC_HCP_WITH_H3K4ME3_AND_H3K27ME3	MIKKELSEN_NPC_HCP_WITH_H3K4ME3_AND_H3K27ME3		59	-0.34796762	-1.3547596	0.045454547	0.33569524	1.0	950	tags=32%, list=13%, signal=37%
MIKKELSEN_ES_ICP_WITH_H3K4ME3_AND_H3K27ME3	MIKKELSEN_ES_ICP_WITH_H3K4ME3_AND_H3K27ME3		33	-0.37044698	-1.3538665	0.097222224	0.33621976	1.0	1079	tags=42%, list=15%, signal=49%
ENGELMANN_CANCER_PROGENITORS_DN	ENGELMANN_CANCER_PROGENITORS_DN		35	-0.37582874	-1.3530117	0.08695652	0.33667716	1.0	430	tags=23%, list=6%, signal=24%
IIZUKA_LIVER_CANCER_PROGRESSION_G2_G3_UP	IIZUKA_LIVER_CANCER_PROGRESSION_G2_G3_UP		24	-0.4010128	-1.3527695	0.1036036	0.3359888	1.0	977	tags=29%, list=13%, signal=33%
GAUSSMANN_MLL_AF4_FUSION_TARGETS_E_UP	GAUSSMANN_MLL_AF4_FUSION_TARGETS_E_UP		46	-0.3517214	-1.3518769	0.046979867	0.33654237	1.0	489	tags=20%, list=7%, signal=21%
TARTE_PLASMA_CELL_VS_PLASMABLAST_UP	TARTE_PLASMA_CELL_VS_PLASMABLAST_UP		223	-0.26499778	-1.3513131	0.0	0.3364997	1.0	1024	tags=24%, list=14%, signal=27%
DAVICIONI_TARGETS_OF_PAX_FOXO1_FUSIONS_DN	DAVICIONI_TARGETS_OF_PAX_FOXO1_FUSIONS_DN		42	-0.35431662	-1.3510795	0.07692308	0.33581734	1.0	1090	tags=31%, list=15%, signal=36%
PID_SHP2_PATHWAY	PID_SHP2_PATHWAY		31	-0.37802413	-1.3482015	0.074074075	0.33947086	1.0	1385	tags=39%, list=19%, signal=47%
REACTOME_TRANSPORT_OF_GLUCOSE_AND_OTHER_SUGARS_BILE_SALTS_AND_ORGANIC_ACIDS_METAL_IONS_AND_AMINE_COMPOUNDS	REACTOME_TRANSPORT_OF_GLUCOSE_AND_OTHER_SUGARS_BILE_SALTS_AND_ORGANIC_ACIDS_METAL_IONS_AND_AMINE_COMPOUNDS		26	-0.40985274	-1.3477085	0.0900474	0.3392251	1.0	776	tags=23%, list=10%, signal=26%
WU_SILENCED_BY_METHYLATION_IN_BLADDER_CANCER	WU_SILENCED_BY_METHYLATION_IN_BLADDER_CANCER		42	-0.3487705	-1.3473083	0.08074534	0.33881044	1.0	589	tags=19%, list=8%, signal=21%
DAVICIONI_TARGETS_OF_PAX_FOXO1_FUSIONS_UP	DAVICIONI_TARGETS_OF_PAX_FOXO1_FUSIONS_UP		195	-0.2566691	-1.3462992	0.0	0.339495	1.0	1046	tags=29%, list=14%, signal=33%
KEGG_LEISHMANIA_INFECTION	KEGG_LEISHMANIA_INFECTION		37	-0.37064788	-1.3461177	0.08108108	0.33884656	1.0	1277	tags=41%, list=17%, signal=49%
KINSEY_TARGETS_OF_EWSR1_FLII_FUSION_DN	KINSEY_TARGETS_OF_EWSR1_FLII_FUSION_DN		208	-0.27043778	-1.3457551	0.0	0.33845264	1.0	1023	tags=25%, list=14%, signal=29%
MELLMAN_TUT1_TARGETS_DN	MELLMAN_TUT1_TARGETS_DN		33	-0.3696423	-1.3454902	0.10204082	0.337857	1.0	826	tags=27%, list=11%, signal=31%
WATANABE_COLON_CANCER_MSI_VS_MSS_UP	WATANABE_COLON_CANCER_MSI_VS_MSS_UP		12	-0.47822145	-1.3412411	0.14181818	0.34369203	1.0	702	tags=42%, list=9%, signal=46%
YAO_HOXA10_TARGETS_VIA_PROGESTERONE_UP	YAO_HOXA10_TARGETS_VIA_PROGESTERONE_UP		48	-0.3428871	-1.3390279	0.07194245	0.34682518	1.0	996	tags=33%, list=13%, signal=38%
QI_PLASMACYTOMA_UP	QI_PLASMACYTOMA_UP		124	-0.2868568	-1.3383908	0.04347826	0.34703764	1.0	1338	tags=33%, list=18%, signal=40%
DORN_ADENOVIRUS_INFECTION_32HR_DN	DORN_ADENOVIRUS_INFECTION_32HR_DN		28	-0.39830717	-1.337622	0.06030151	0.34736124	1.0	1245	tags=43%, list=17%, signal=51%
LIU_SMARCA4_TARGETS	LIU_SMARCA4_TARGETS		34	-0.36888936	-1.3373086	0.09375	0.34693155	1.0	815	tags=32%, list=11%, signal=36%
TONKS_TARGETS_OF_RUNX1_RUNX1T1_FUSION_HSC_DN	TONKS_TARGETS_OF_RUNX1_RUNX1T1_FUSION_HSC_DN		115	-0.293398	-1.3366567	0.0	0.34688357	1.0	1003	tags=29%, list=13%, signal=33%
ZHOU_INFLAMMATORY_RESPONSE_LPS_UP	ZHOU_INFLAMMATORY_RESPONSE_LPS_UP		133	-0.2857195	-1.3357905	0.04761905	0.34747335	1.0	793	tags=23%, list=11%, signal=26%
ZHOU_INFLAMMATORY_RESPONSE_LIVE_UP	ZHOU_INFLAMMATORY_RESPONSE_LIVE_UP		174	-0.27688104	-1.3342112	0.0	0.34930807	1.0	943	tags=26%, list=13%, signal=29%
MIKKELSEN_MCV6_ICP_WITH_H3K27ME3	MIKKELSEN_MCV6_ICP_WITH_H3K27ME3		18	-0.4307468	-1.333346	0.12446352	0.34968135	1.0	1210	tags=44%, list=16%, signal=53%
KEGG_VIRAL_MYOCARDITIS	KEGG_VIRAL_MYOCARDITIS		40	-0.34894484	-1.3314664	0.08743169	0.35167816	1.0	723	tags=25%, list=10%, signal=28%
LIU_VAV3_PROSTATE_CARCINOGENESIS_DN	LIU_VAV3_PROSTATE_CARCINOGENESIS_DN		10	-0.4995505	-1.3285631	0.15570934	0.3555825	1.0	245	tags=30%, list=3%, signal=31%
BIOCARTA_DREAM_PATHWAY	BIOCARTA_DREAM_PATHWAY		10	-0.50164235	-1.3274186	0.16494845	0.35656127	1.0	895	tags=40%, list=12%, signal=45%
GAVIN_FOXP3_TARGETS_CLUSTER_T4	GAVIN_FOXP3_TARGETS_CLUSTER_T4		58	-0.32211974	-1.3265204	0.03448276	0.35722107	1.0	970	tags=28%, list=13%, signal=31%
TONKS_TARGETS_OF_RUNX1_RUNX1T1_FUSION_HSC_UP	TONKS_TARGETS_OF_RUNX1_RUNX1T1_FUSION_HSC_UP		131	-0.28068888	-1.3264166	0.0	0.35637146	1.0	1012	tags=27%, list=14%, signal=31%
JOHANSSON_GLIOMAGENESIS_BY_PDGFB_DN	JOHANSSON_GLIOMAGENESIS_BY_PDGFB_DN		13	-0.47567695	-1.3263791	0.13468014	0.35545748	1.0	1894	tags=69%, list=25%, signal=93%
MEISSNER_NPC_HCP_WITH_H3_UNMETHYLATED	MEISSNER_NPC_HCP_WITH_H3_UNMETHYLATED		139	-0.28182876	-1.3253641	0.046511628	0.35604203	1.0	1077	tags=29%, list=14%, signal=33%
PID_NETRIN_PATHWAY	PID_NETRIN_PATHWAY		19	-0.41908714	-1.3247299	0.12554112	0.35617754	1.0	1906	tags=47%, list=26%, signal=64%
JEPSEN_SMRT_TARGETS	JEPSEN_SMRT_TARGETS		22	-0.410212	-1.3231384	0.1	0.35783562	1.0	973	tags=32%, list=13%, signal=36%
LI_CISPLATIN_RESISTANCE_DN	LI_CISPLATIN_RESISTANCE_DN		16	-0.4341311	-1.3231298	0.14344262	0.35685983	1.0	553	tags=31%, list=7%, signal=34%
SATO_SILENCED_BY_DEACETYLATION_IN_PANCREATIC_CANCER	SATO_SILENCED_BY_DEACETYLATION_IN_PANCREATIC_CANCER		23	-0.4038148	-1.3225423	0.09361702	0.35687074	1.0	564	tags=35%, list=8%, signal=38%
GAUSSMANN_MLL_AF4_FUSION_TARGETS_F_UP	GAUSSMANN_MLL_AF4_FUSION_TARGETS_F_UP		90	-0.29749426	-1.3210547	0.029126214	0.35811535	1.0	812	tags=23%, list=11%, signal=26%
LE_NEURONAL_DIFFERENTIATION_UP	LE_NEURONAL_DIFFERENTIATION_UP		10	-0.5067739	-1.3196286	0.14333333	0.3596924	1.0	1119	tags=40%, list=15%, signal=47%
LUI_THYROID_CANCER_CLUSTER_4	LUI_THYROID_CANCER_CLUSTER_4		11	-0.50561446	-1.318704	0.15018316	0.3603064	1.0	667	tags=45%, list=9%, signal=50%
OLSSON_E2F3_TARGETS_UP	OLSSON_E2F3_TARGETS_UP		16	-0.44417292	-1.3175639	0.14772727	0.36131582	1.0	612	tags=19%, list=8%, signal=20%
DORN_ADENOVIRUS_INFECTION_48HR_DN	DORN_ADENOVIRUS_INFECTION_48HR_DN		29	-0.39224184	-1.3171706	0.11374407	0.36102805	1.0	1245	tags=41%, list=17%, signal=50%
LIANG_HEMATOPOIESIS_STEM_CELL_NUMBER_SMALL_VS_HUGE_DN	LIANG_HEMATOPOIESIS_STEM_CELL_NUMBER_SMALL_VS_HUGE_DN		22	-0.40279767	-1.3163234	0.13419913	0.36147133	1.0	280	tags=23%, list=4%, signal=24%
SENGUPTA_NASOPHARYNGEAL_CARCINOMA_DN	SENGUPTA_NASOPHARYNGEAL_CARCINOMA_DN		70	-0.32325226	-1.3132204	0.058333334	0.36596024	1.0	1111	tags=30%, list=15%, signal=35%
RAMPON_ENRICHED_LEARNING_ENVIRONMENT_LATE_UP	RAMPON_ENRICHED_LEARNING_ENVIRONMENT_LATE_UP		16	-0.44640192	-1.3128885	0.12350598	0.3655812	1.0	262	tags=19%, list=4%, signal=19%
PETROVA_PROX1_TARGETS_DN	PETROVA_PROX1_TARGETS_DN		47	-0.3290243	-1.3105433	0.078431375	0.36889678	1.0	1517	tags=36%, list=20%, signal=45%
NAKAYAMA_SOFT_TISSUE_TUMORS_PCA1_UP	NAKAYAMA_SOFT_TISSUE_TUMORS_PCA1_UP		57	-0.31545493	-1.3097099	0.05755396	0.36934593	1.0	659	tags=25%, list=9%, signal=27%
MCBRYAN_PUBERTAL_BREAST_4_5WK_UP	MCBRYAN_PUBERTAL_BREAST_4_5WK_UP		132	-0.27030176	-1.3095791	0.04347826	0.36863524	1.0	926	tags=22%, list=12%, signal=25%
GAURNIER_PSMD4_TARGETS	GAURNIER_PSMD4_TARGETS		32	-0.36789057	-1.3085166	0.10891089	0.3695075	1.0	990	tags=31%, list=13%, signal=36%
TIAN_TNF_SIGNALING_VIA_NFKB	TIAN_TNF_SIGNALING_VIA_NFKB		14	-0.4563043	-1.3084253	0.15530303	0.3686934	1.0	1196	tags=43%, list=16%, signal=51%
PEDERSEN_METASTASIS_BY_ERBB2_ISOFORM_4	PEDERSEN_METASTASIS_BY_ERBB2_ISOFORM_4		50	-0.33051878	-1.3075287	0.078947365	0.3693286	1.0	978	tags=28%, list=13%, signal=32%
PRAMOONJAGO_SOX4_TARGETS_UP	PRAMOONJAGO_SOX4_TARGETS_UP		44	-0.33715048	-1.3074298	0.07777778	0.36852905	1.0	786	tags=25%, list=11%, signal=28%
SABATES_COLORECTAL_ADENOMA_DN	SABATES_COLORECTAL_ADENOMA_DN		107	-0.29355285	-1.3074017	0.028985508	0.36760145	1.0	1053	tags=27%, list=14%, signal=31%
LI_WILMS_TUMOR	LI_WILMS_TUMOR		11	-0.49576202	-1.3073081	0.18272425	0.3667855	1.0	752	tags=45%, list=10%, signal=50%
REACTOME_PLATELET_ACTIVATION_SIGNALING_AND_AGGREGATION	REACTOME_PLATELET_ACTIVATION_SIGNALING_AND_AGGREGATION		120	-0.27345994	-1.3065286	0.037037037	0.36720943	1.0	1503	tags=32%, list=20%, signal=39%
GENTILE_UV_LOW_DOSE_UP	GENTILE_UV_LOW_DOSE_UP		22	-0.39666933	-1.305934	0.1493776	0.36738512	1.0	519	tags=23%, list=7%, signal=24%
KEGG_DILATED_CARDIOMYOPATHY	KEGG_DILATED_CARDIOMYOPATHY		37	-0.35268646	-1.3058095	0.08290155	0.36664736	1.0	1117	tags=30%, list=15%, signal=35%
MIKKELSEN_MEF_ICP_WITH_H3K27ME3	MIKKELSEN_MEF_ICP_WITH_H3K27ME3		32	-0.35869867	-1.3052291	0.074257426	0.36672333	1.0	1097	tags=47%, list=15%, signal=55%
DANG_MYC_TARGETS_DN	DANG_MYC_TARGETS_DN		22	-0.3899138	-1.3040043	0.1255814	0.36783817	1.0	1619	tags=41%, list=22%, signal=52%
HOEGERKORP_CD44_TARGETS_TEMPORAL_DN	HOEGERKORP_CD44_TARGETS_TEMPORAL_DN		15	-0.44515184	-1.3033744	0.16078432	0.36793074	1.0	341	tags=20%, list=5%, signal=21%
CERVERA_SDHB_TARGETS_1_UP	CERVERA_SDHB_TARGETS_1_UP		49	-0.3337565	-1.3020719	0.12418301	0.3693882	1.0	454	tags=18%, list=6%, signal=19%
FERRARI_RESPONSE_TO_FENRETINIDE_UP	FERRARI_RESPONSE_TO_FENRETINIDE_UP		14	-0.46032578	-1.3007382	0.15413533	0.37078956	1.0	1960	tags=57%, list=26%, signal=77%
INGRAM_SHH_TARGETS_DN	INGRAM_SHH_TARGETS_DN		40	-0.35308117	-1.3007048	0.08988764	0.36987984	1.0	412	tags=23%, list=6%, signal=24%
BIOCARTA_NOS1_PATHWAY	BIOCARTA_NOS1_PATHWAY		10	-0.5046555	-1.298396	0.18730159	0.372993	1.0	456	tags=30%, list=6%, signal=32%
PID_RAS_PATHWAY	PID_RAS_PATHWAY		18	-0.42918658	-1.2978815	0.12252964	0.37296057	1.0	2149	tags=72%, list=29%, signal=101%
WANG_CLASSIC_ADIPOGENIC_TARGETS_OF_PPARG	WANG_CLASSIC_ADIPOGENIC_TARGETS_OF_PPARG		12	-0.4567883	-1.2965173	0.15357143	0.37437338	1.0	826	tags=33%, list=11%, signal=37%
FERREIRA_EWINGS_SARCOMA_UNSTABLE_VS_STABLE_DN	FERREIRA_EWINGS_SARCOMA_UNSTABLE_VS_STABLE_DN		47	-0.3247134	-1.2952719	0.047945205	0.37541142	1.0	1452	tags=36%, list=20%, signal=45%
BERENJENO_ROCK_SIGNALING_NOT_VIA_RHOA_UP	BERENJENO_ROCK_SIGNALING_NOT_VIA_RHOA_UP		17	-0.42620307	-1.2931259	0.17408907	0.3786139	1.0	1508	tags=47%, list=20%, signal=59%
MIKKELSEN_NPC_ICP_WITH_H3K4ME3	MIKKELSEN_NPC_ICP_WITH_H3K4ME3		194	-0.266199	-1.2927043	0.0	0.3783741	1.0	693	tags=18%, list=9%, signal=19%
GAVIN_FOXP3_TARGETS_CLUSTER_P7	GAVIN_FOXP3_TARGETS_CLUSTER_P7		38	-0.34248498	-1.2925664	0.096045196	0.3776679	1.0	895	tags=26%, list=12%, signal=30%
KEGG_STEROID_BIOSYNTHESIS	KEGG_STEROID_BIOSYNTHESIS		14	-0.44849926	-1.2915574	0.15708812	0.3784554	1.0	920	tags=29%, list=12%, signal=33%
INGA_TP53_TARGETS	INGA_TP53_TARGETS		13	-0.46416897	-1.2906499	0.18947369	0.3791948	1.0	1268	tags=54%, list=17%, signal=65%
BALDWIN_PRKCI_TARGETS_UP	BALDWIN_PRKCI_TARGETS_UP		28	-0.3768978	-1.2856894	0.13145539	0.38701162	1.0	789	tags=32%, list=11%, signal=36%
MIKKELSEN_MEF_HCP_WITH_H3K27ME3	MIKKELSEN_MEF_HCP_WITH_H3K27ME3		128	-0.2770262	-1.2842125	0.017857144	0.38852525	1.0	988	tags=31%, list=13%, signal=35%
KEGG_VIBRIO_CHOLERAE_INFECTION	KEGG_VIBRIO_CHOLERAE_INFECTION		37	-0.35345092	-1.2825593	0.11235955	0.3906757	1.0	1635	tags=38%, list=22%, signal=48%
LABBE_TARGETS_OF_TGFB1_AND_WNT3A_UP	LABBE_TARGETS_OF_TGFB1_AND_WNT3A_UP		71	-0.29787502	-1.2821311	0.07826087	0.3903995	1.0	1658	tags=41%, list=22%, signal=52%
GAUSSMANN_MLL_AF4_FUSION_TARGETS_G_UP	GAUSSMANN_MLL_AF4_FUSION_TARGETS_G_UP		94	-0.28110573	-1.2819666	0.03448276	0.38974488	1.0	1058	tags=27%, list=14%, signal=31%
AMIT_SERUM_RESPONSE_240_MCF10A	AMIT_SERUM_RESPONSE_240_MCF10A		29	-0.36303586	-1.2810167	0.12796208	0.39054587	1.0	1117	tags=41%, list=15%, signal=49%
PIONTEK_PKD1_TARGETS_UP	PIONTEK_PKD1_TARGETS_UP		15	-0.43327907	-1.2806633	0.1627907	0.39023268	1.0	949	tags=47%, list=13%, signal=53%
JIANG_AGING_CEREBRAL_CORTEX_DN	JIANG_AGING_CEREBRAL_CORTEX_DN		42	-0.34275788	-1.2791673	0.093406595	0.3920132	1.0	1113	tags=21%, list=15%, signal=25%
TOMIDA_METASTASIS_DN	TOMIDA_METASTASIS_DN		15	-0.4239653	-1.2791189	0.17977528	0.39112592	1.0	393	tags=20%, list=5%, signal=21%
MCCLUNG_CREB1_TARGETS_UP	MCCLUNG_CREB1_TARGETS_UP		59	-0.31581467	-1.2787687	0.083333336	0.390802	1.0	1093	tags=25%, list=15%, signal=30%
PID_INTEGRIN_A4B1_PATHWAY	PID_INTEGRIN_A4B1_PATHWAY		21	-0.41179955	-1.2772168	0.16532259	0.39266387	1.0	517	tags=24%, list=7%, signal=26%
MEISSNER_BRAIN_HCP_WITH_H3K4ME2_AND_H3K27ME3	MEISSNER_BRAIN_HCP_WITH_H3K4ME2_AND_H3K27ME3		11	-0.47264573	-1.27715	0.1672355	0.3918256	1.0	688	tags=27%, list=9%, signal=30%
ST_DIFFERENTIATION_PATHWAY_IN_PC12_CELLS	ST_DIFFERENTIATION_PATHWAY_IN_PC12_CELLS		30	-0.35858312	-1.2747599	0.10194175	0.3951704	1.0	940	tags=30%, list=13%, signal=34%
KIM_WT1_TARGETS_UP	KIM_WT1_TARGETS_UP		153	-0.27349776	-1.2732974	0.035714287	0.39686033	1.0	1443	tags=35%, list=19%, signal=42%
YAO_TEMPORAL_RESPONSE_TO_PROGESTERONE_CLUSTER_0	YAO_TEMPORAL_RESPONSE_TO_PROGESTERONE_CLUSTER_0		49	-0.31955683	-1.2729007	0.09756097	0.39662305	1.0	732	tags=22%, list=10%, signal=25%
GRAHAM_CML_QUIESCENT_VS_NORMAL_DIVIDING_UP	GRAHAM_CML_QUIESCENT_VS_NORMAL_DIVIDING_UP		42	-0.33019993	-1.2714363	0.097402595	0.39833543	1.0	502	tags=26%, list=7%, signal=28%
NOJIMA_SFRP2_TARGETS_UP	NOJIMA_SFRP2_TARGETS_UP		19	-0.40456107	-1.2711302	0.15899582	0.39792493	1.0	1180	tags=37%, list=16%, signal=44%
PID_CXCR4_PATHWAY	PID_CXCR4_PATHWAY		59	-0.31250775	-1.2701257	0.06837607	0.39896914	1.0	1117	tags=27%, list=15%, signal=32%
MARKEY_RB1_ACUTE_LOF_UP	MARKEY_RB1_ACUTE_LOF_UP		114	-0.27843305	-1.2670177	0.056338027	0.40398908	1.0	984	tags=22%, list=13%, signal=25%
GESERICK_TERT_TARGETS_DN	GESERICK_TERT_TARGETS_DN		15	-0.44655967	-1.2652522	0.17716536	0.4063909	1.0	1657	tags=47%, list=22%, signal=60%
IVANOVA_HEMATOPOIESIS_STEM_CELL	IVANOVA_HEMATOPOIESIS_STEM_CELL		125	-0.26599658	-1.2634858	0.08	0.40884468	1.0	529	tags=15%, list=7%, signal=16%
FOSTER_TOLERANT_MACROPHAGE_UP	FOSTER_TOLERANT_MACROPHAGE_UP		71	-0.29982448	-1.2624652	0.06542056	0.40989512	1.0	945	tags=24%, list=13%, signal=27%
HASLINGER_B_CLL_WITH_MUTATED_VH_GENES	HASLINGER_B_CLL_WITH_MUTATED_VH_GENES		14	-0.44365823	-1.2611359	0.19444445	0.41159555	1.0	792	tags=29%, list=11%, signal=32%
ODONNELL_TARGETS_OF_MYC_AND_TFRC_UP	ODONNELL_TARGETS_OF_MYC_AND_TFRC_UP		41	-0.3247305	-1.257627	0.12258065	0.41737577	1.0	1086	tags=29%, list=15%, signal=34%
WANG_BARRETTS_ESOPHAGUS_DN	WANG_BARRETTS_ESOPHAGUS_DN		18	-0.41074875	-1.2557033	0.15111111	0.4200198	1.0	1107	tags=39%, list=15%, signal=46%
MCGARVEY_SILENCED_BY_METHYLATION_IN_COLON_CANCER	MCGARVEY_SILENCED_BY_METHYLATION_IN_COLON_CANCER		17	-0.40715882	-1.2547964	0.17424242	0.42066643	1.0	493	tags=29%, list=7%, signal=31%
REACTOME_TRIGLYCERIDE_BIOSYNTHESIS	REACTOME_TRIGLYCERIDE_BIOSYNTHESIS		17	-0.41290006	-1.252648	0.15447155	0.4238333	1.0	1080	tags=29%, list=15%, signal=34%
URS_ADIPOCYTE_DIFFERENTIATION_UP	URS_ADIPOCYTE_DIFFERENTIATION_UP		41	-0.32958385	-1.248138	0.12209302	0.4319113	1.0	658	tags=20%, list=9%, signal=21%
STEGER_ADIPOGENESIS_UP	STEGER_ADIPOGENESIS_UP		10	-0.47320944	-1.2480665	0.19178082	0.43100858	1.0	3924	tags=100%, list=53%, signal=211%
WALLACE_PROSTATE_CANCER_RACE_UP	WALLACE_PROSTATE_CANCER_RACE_UP		177	-0.25565714	-1.2472824	0.0	0.43154567	1.0	670	tags=19%, list=9%, signal=21%
ACOSTA_PROLIFERATION_INDEPENDENT_MYC_TARGETS_DN	ACOSTA_PROLIFERATION_INDEPENDENT_MYC_TARGETS_DN		75	-0.29829213	-1.2469976	0.061946902	0.43110153	1.0	836	tags=24%, list=11%, signal=27%
ABRAHAM_ALPC_VS_MULTIPLE_MYELOMA_UP	ABRAHAM_ALPC_VS_MULTIPLE_MYELOMA_UP		22	-0.37563196	-1.2461543	0.15811966	0.43176013	1.0	333	tags=27%, list=4%, signal=28%
KOHOUTEK_CCNT1_TARGETS	KOHOUTEK_CCNT1_TARGETS		25	-0.37858608	-1.2459698	0.15	0.43111387	1.0	1157	tags=40%, list=16%, signal=47%
HILLION_HMGA1_TARGETS	HILLION_HMGA1_TARGETS		57	-0.30999997	-1.2448621	0.13432837	0.43211547	1.0	895	tags=19%, list=12%, signal=22%
DACOSTA_ERCC3_ALLELE_XPCS_VS_TTD_DN	DACOSTA_ERCC3_ALLELE_XPCS_VS_TTD_DN		24	-0.37944427	-1.2433014	0.15962441	0.43401715	1.0	808	tags=25%, list=11%, signal=28%
VICENT_METASTASIS_UP	VICENT_METASTASIS_UP		11	-0.4639028	-1.2421776	0.20895523	0.4352967	1.0	110	tags=18%, list=1%, signal=18%
RODWELL_AGING_KIDNEY_DN	RODWELL_AGING_KIDNEY_DN		84	-0.28177842	-1.241784	0.10344828	0.43505818	1.0	841	tags=18%, list=11%, signal=20%
COLIN_PILOCYTIC_ASTROCYTOMA_VS_GLIOBLASTOMA_DN	COLIN_PILOCYTIC_ASTROCYTOMA_VS_GLIOBLASTOMA_DN		21	-0.38036618	-1.241163	0.1796875	0.4354427	1.0	1669	tags=43%, list=22%, signal=55%
GARGALOVIC_RESPONSE_TO_OXIDIZED_PHOSPHOLIPIDS_MAGENTA_UP	GARGALOVIC_RESPONSE_TO_OXIDIZED_PHOSPHOLIPIDS_MAGENTA_UP		16	-0.42703345	-1.2405882	0.21428572	0.4355614	1.0	1196	tags=44%, list=16%, signal=52%
LIEN_BREAST_CARCINOMA_METAPLASTIC_VS_DUCTAL_UP	LIEN_BREAST_CARCINOMA_METAPLASTIC_VS_DUCTAL_UP		45	-0.32639578	-1.2381924	0.1	0.4391178	1.0	501	tags=24%, list=7%, signal=26%
YAO_TEMPORAL_RESPONSE_TO_PROGESTERONE_CLUSTER_6	YAO_TEMPORAL_RESPONSE_TO_PROGESTERONE_CLUSTER_6		38	-0.33862016	-1.2379347	0.13541667	0.43871891	1.0	723	tags=29%, list=10%, signal=32%
NIELSEN_MALIGNAT_FIBROUS_HISTIOCYTOMA_DN	NIELSEN_MALIGNAT_FIBROUS_HISTIOCYTOMA_DN		11	-0.45164618	-1.2368567	0.20952381	0.43989483	1.0	731	tags=45%, list=10%, signal=50%
BERNARD_PPAPDC1B_TARGETS_DN	BERNARD_PPAPDC1B_TARGETS_DN		30	-0.3576186	-1.2350656	0.13157895	0.4423759	1.0	1385	tags=53%, list=19%, signal=65%
REACTOME_PLATELET_AGGREGATION_PLUG_FORMATION	REACTOME_PLATELET_AGGREGATION_PLUG_FORMATION		20	-0.3929686	-1.234672	0.19753087	0.44213983	1.0	1056	tags=35%, list=14%, signal=41%
TERAO_AOX4_TARGETS_HG_UP	TERAO_AOX4_TARGETS_HG_UP		13	-0.4316905	-1.2341206	0.22614841	0.4423392	1.0	1182	tags=54%, list=16%, signal=64%
SAMOLS_TARGETS_OF_KHSV_MIRNAS_DN	SAMOLS_TARGETS_OF_KHSV_MIRNAS_DN		43	-0.3293075	-1.2338386	0.14375	0.44187385	1.0	504	tags=23%, list=7%, signal=25%
WANG_BARRETTS_ESOPHAGUS_UP	WANG_BARRETTS_ESOPHAGUS_UP		21	-0.39027667	-1.2312447	0.19004525	0.4462225	1.0	924	tags=29%, list=12%, signal=33%
HALMOS_CEBPA_TARGETS_DN	HALMOS_CEBPA_TARGETS_DN		27	-0.3545695	-1.2303675	0.19248827	0.44697422	1.0	945	tags=33%, list=13%, signal=38%
TAKEDA_TARGETS_OF_NUP98_HOXA9_FUSION_6HR_DN	TAKEDA_TARGETS_OF_NUP98_HOXA9_FUSION_6HR_DN		21	-0.39641047	-1.2302576	0.21238938	0.44621006	1.0	1126	tags=33%, list=15%, signal=39%
HUI_MAPK14_TARGETS_UP	HUI_MAPK14_TARGETS_UP		13	-0.4506696	-1.2297248	0.22556391	0.4462858	1.0	1260	tags=46%, list=17%, signal=55%
REACTOME_GRB2_SOS_PROVIDES_LINKAGE_TO_MAPK_SIGNALING_FOR_INTERGRINS_	REACTOME_GRB2_SOS_PROVIDES_LINKAGE_TO_MAPK_SIGNALING_FOR_INTERGRINS_		11	-0.45009997	-1.2266996	0.2080537	0.45135164	1.0	1056	tags=45%, list=14%, signal=53%
NAKAMURA_ADIPOGENESIS_EARLY_UP	NAKAMURA_ADIPOGENESIS_EARLY_UP		39	-0.32431108	-1.2257906	0.15555556	0.45209545	1.0	1183	tags=31%, list=16%, signal=36%
RUAN_RESPONSE_TO_TNF_TROGLITAZONE_UP	RUAN_RESPONSE_TO_TNF_TROGLITAZONE_UP		10	-0.4795292	-1.225112	0.22727273	0.4525149	1.0	1447	tags=40%, list=19%, signal=50%
SCIAN_INVERSED_TARGETS_OF_TP53_AND_TP73_DN	SCIAN_INVERSED_TARGETS_OF_TP53_AND_TP73_DN		21	-0.38361964	-1.2249746	0.19148937	0.4517716	1.0	563	tags=19%, list=8%, signal=21%
KEGG_PPAR_SIGNALING_PATHWAY	KEGG_PPAR_SIGNALING_PATHWAY		35	-0.33894014	-1.222018	0.14973262	0.45682263	1.0	1198	tags=29%, list=16%, signal=34%
KEGG_ALDOSTERONE_REGULATED_SODIUM_REABSORPTION	KEGG_ALDOSTERONE_REGULATED_SODIUM_REABSORPTION		24	-0.36814246	-1.2218899	0.18297872	0.45604265	1.0	1792	tags=54%, list=24%, signal=71%
AMUNDSON_GAMMA_RADIATION_RESISTANCE	AMUNDSON_GAMMA_RADIATION_RESISTANCE		12	-0.44736347	-1.221859	0.21649484	0.45507735	1.0	7	tags=8%, list=0%, signal=8%
MASSARWEH_TAMOXIFEN_RESISTANCE_UP	MASSARWEH_TAMOXIFEN_RESISTANCE_UP		274	-0.24489667	-1.2214245	0.0	0.45483604	1.0	964	tags=23%, list=13%, signal=25%
REACTOME_TIE2_SIGNALING	REACTOME_TIE2_SIGNALING		11	-0.45223984	-1.2212465	0.2173913	0.4542589	1.0	1191	tags=45%, list=16%, signal=54%
HOFFMANN_LARGE_TO_SMALL_PRE_BII_LYMPHOCYTE_DN	HOFFMANN_LARGE_TO_SMALL_PRE_BII_LYMPHOCYTE_DN		42	-0.32124257	-1.219686	0.13529412	0.45651528	1.0	1338	tags=36%, list=18%, signal=43%
BIOCARTA_PLATELETAPP_PATHWAY	BIOCARTA_PLATELETAPP_PATHWAY		10	-0.45772395	-1.219587	0.21978022	0.45571664	1.0	1443	tags=50%, list=19%, signal=62%
COULOUARN_TEMPORAL_TGFB1_SIGNATURE_DN	COULOUARN_TEMPORAL_TGFB1_SIGNATURE_DN		86	-0.28320602	-1.2191151	0.16666667	0.45564824	1.0	1180	tags=29%, list=16%, signal=34%
DAVICIONI_PAX_FOXO1_SIGNATURE_IN_ARMS_DN	DAVICIONI_PAX_FOXO1_SIGNATURE_IN_ARMS_DN		14	-0.43221742	-1.218049	0.22178988	0.45679858	1.0	924	tags=29%, list=12%, signal=33%
FOSTER_KDM1A_TARGETS_UP	FOSTER_KDM1A_TARGETS_UP		85	-0.27464524	-1.2175577	0.11764706	0.45680308	1.0	1416	tags=34%, list=19%, signal=42%
LI_WILMS_TUMOR_VS_FETAL_KIDNEY_1_UP	LI_WILMS_TUMOR_VS_FETAL_KIDNEY_1_UP		133	-0.25502595	-1.2174796	0.055555556	0.45598346	1.0	867	tags=20%, list=12%, signal=23%
NIELSEN_LIPOSARCOMA_UP	NIELSEN_LIPOSARCOMA_UP		12	-0.43987238	-1.2174422	0.20652173	0.45506665	1.0	607	tags=33%, list=8%, signal=36%
REACTOME_PROTEOLYTIC_CLEAVAGE_OF_SNARE_COMPLEX_PROTEINS	REACTOME_PROTEOLYTIC_CLEAVAGE_OF_SNARE_COMPLEX_PROTEINS		13	-0.42158818	-1.2136384	0.22568093	0.46223918	1.0	1945	tags=62%, list=26%, signal=83%
REACTOME_CTLA4_INHIBITORY_SIGNALING	REACTOME_CTLA4_INHIBITORY_SIGNALING		15	-0.40449896	-1.2129644	0.21568628	0.46265745	1.0	1102	tags=40%, list=15%, signal=47%
PLASARI_TGFB1_TARGETS_10HR_UP	PLASARI_TGFB1_TARGETS_10HR_UP		89	-0.2748939	-1.2125955	0.08219178	0.46237728	1.0	1196	tags=33%, list=16%, signal=38%
PLASARI_TGFB1_SIGNALING_VIA_NFIC_1HR_UP	PLASARI_TGFB1_SIGNALING_VIA_NFIC_1HR_UP		15	-0.42070317	-1.2124565	0.23809524	0.46168035	1.0	905	tags=47%, list=12%, signal=53%
MIKKELSEN_IPS_ICP_WITH_H3K4ME3_AND_H327ME3	MIKKELSEN_IPS_ICP_WITH_H3K4ME3_AND_H327ME3		34	-0.33999723	-1.2113154	0.17222223	0.4630363	1.0	774	tags=32%, list=10%, signal=36%
WANG_MLL_TARGETS	WANG_MLL_TARGETS		116	-0.26595432	-1.2107301	0.073529415	0.46327934	1.0	551	tags=19%, list=7%, signal=20%
FULCHER_INFLAMMATORY_RESPONSE_LECTIN_VS_LPS_DN	FULCHER_INFLAMMATORY_RESPONSE_LECTIN_VS_LPS_DN		242	-0.24257271	-1.2097476	0.08695652	0.46423578	1.0	862	tags=20%, list=12%, signal=22%
GRAHAM_CML_QUIESCENT_VS_CML_DIVIDING_UP	GRAHAM_CML_QUIESCENT_VS_CML_DIVIDING_UP		12	-0.43874505	-1.2094741	0.22711864	0.4638502	1.0	201	tags=25%, list=3%, signal=26%
RUTELLA_RESPONSE_TO_CSF2RB_AND_IL4_UP	RUTELLA_RESPONSE_TO_CSF2RB_AND_IL4_UP		253	-0.23737504	-1.2089878	0.125	0.46384934	1.0	1458	tags=31%, list=20%, signal=37%
KEEN_RESPONSE_TO_ROSIGLITAZONE_DN	KEEN_RESPONSE_TO_ROSIGLITAZONE_DN		79	-0.27569556	-1.2087119	0.12962963	0.46337518	1.0	1052	tags=24%, list=14%, signal=28%
ODONNELL_TFRC_TARGETS_UP	ODONNELL_TFRC_TARGETS_UP		179	-0.25708756	-1.208662	0.06666667	0.4624993	1.0	939	tags=25%, list=13%, signal=27%
XU_HGF_SIGNALING_NOT_VIA_AKT1_48HR_UP	XU_HGF_SIGNALING_NOT_VIA_AKT1_48HR_UP		29	-0.3448267	-1.2084914	0.175	0.46186653	1.0	788	tags=28%, list=11%, signal=31%
NELSON_RESPONSE_TO_ANDROGEN_DN	NELSON_RESPONSE_TO_ANDROGEN_DN		17	-0.39719126	-1.207688	0.22053231	0.4626045	1.0	235	tags=24%, list=3%, signal=24%
AMIT_EGF_RESPONSE_120_HELA	AMIT_EGF_RESPONSE_120_HELA		46	-0.31195006	-1.2065239	0.15286624	0.46415412	1.0	1114	tags=33%, list=15%, signal=38%
ZHAN_MULTIPLE_MYELOMA_MF_UP	ZHAN_MULTIPLE_MYELOMA_MF_UP		25	-0.3519705	-1.2064996	0.2228261	0.46322277	1.0	902	tags=28%, list=12%, signal=32%
BIOCARTA_NO1_PATHWAY	BIOCARTA_NO1_PATHWAY		10	-0.46089146	-1.2043825	0.23776224	0.46678087	1.0	300	tags=20%, list=4%, signal=21%
SANA_TNF_SIGNALING_UP	SANA_TNF_SIGNALING_UP		43	-0.31916508	-1.2037812	0.16753927	0.4670019	1.0	1471	tags=35%, list=20%, signal=43%
MENSE_HYPOXIA_UP	MENSE_HYPOXIA_UP		57	-0.30804282	-1.2031417	0.13768116	0.46736175	1.0	793	tags=25%, list=11%, signal=27%
SCHMIDT_POR_TARGETS_IN_LIMB_BUD_UP	SCHMIDT_POR_TARGETS_IN_LIMB_BUD_UP		21	-0.37483215	-1.202142	0.23245615	0.468441	1.0	1380	tags=43%, list=19%, signal=52%
VANHARANTA_UTERINE_FIBROID_DN	VANHARANTA_UTERINE_FIBROID_DN		53	-0.29972658	-1.2018955	0.13605443	0.46794087	1.0	1082	tags=30%, list=15%, signal=35%
MIKKELSEN_MCV6_LCP_WITH_H3K4ME3	MIKKELSEN_MCV6_LCP_WITH_H3K4ME3		50	-0.30401757	-1.2002646	0.11805555	0.47043553	1.0	1230	tags=36%, list=17%, signal=43%
RODRIGUES_THYROID_CARCINOMA_ANAPLASTIC_DN	RODRIGUES_THYROID_CARCINOMA_ANAPLASTIC_DN		264	-0.2228364	-1.1999139	0.0	0.47015554	1.0	504	tags=14%, list=7%, signal=14%
HARRIS_HYPOXIA	HARRIS_HYPOXIA		59	-0.2922115	-1.1992155	0.1440678	0.47067866	1.0	756	tags=20%, list=10%, signal=22%
HAHTOLA_MYCOSIS_FUNGOIDES_DN	HAHTOLA_MYCOSIS_FUNGOIDES_DN		11	-0.43363973	-1.1989731	0.21107267	0.4702637	1.0	513	tags=27%, list=7%, signal=29%
SWEET_LUNG_CANCER_KRAS_UP	SWEET_LUNG_CANCER_KRAS_UP		301	-0.23415756	-1.197513	0.0	0.47232312	1.0	1270	tags=26%, list=17%, signal=30%
CREIGHTON_ENDOCRINE_THERAPY_RESISTANCE_5	CREIGHTON_ENDOCRINE_THERAPY_RESISTANCE_5		249	-0.2417731	-1.1970984	0.071428575	0.4722465	1.0	1081	tags=24%, list=15%, signal=27%
ZHENG_GLIOBLASTOMA_PLASTICITY_DN	ZHENG_GLIOBLASTOMA_PLASTICITY_DN		41	-0.3093368	-1.1969811	0.1590909	0.47151384	1.0	1161	tags=27%, list=16%, signal=32%
HELLER_SILENCED_BY_METHYLATION_DN	HELLER_SILENCED_BY_METHYLATION_DN		76	-0.27923247	-1.1965142	0.1764706	0.4714571	1.0	970	tags=24%, list=13%, signal=27%
REACTOME_SIGNALLING_TO_P38_VIA_RIT_AND_RIN	REACTOME_SIGNALLING_TO_P38_VIA_RIT_AND_RIN		10	-0.4665883	-1.1944406	0.24595469	0.47474837	1.0	221	tags=20%, list=3%, signal=21%
REACTOME_NUCLEAR_RECEPTOR_TRANSCRIPTION_PATHWAY	REACTOME_NUCLEAR_RECEPTOR_TRANSCRIPTION_PATHWAY		18	-0.39120188	-1.1941535	0.22924902	0.47433788	1.0	810	tags=33%, list=11%, signal=37%
JOSEPH_RESPONSE_TO_SODIUM_BUTYRATE_UP	JOSEPH_RESPONSE_TO_SODIUM_BUTYRATE_UP		24	-0.35924852	-1.1937585	0.18660288	0.47421622	1.0	784	tags=25%, list=11%, signal=28%
PEDERSEN_TARGETS_OF_611CTF_ISOFORM_OF_ERBB2	PEDERSEN_TARGETS_OF_611CTF_ISOFORM_OF_ERBB2		44	-0.30506855	-1.1934998	0.16774194	0.47377223	1.0	1117	tags=32%, list=15%, signal=37%
MORI_MATURE_B_LYMPHOCYTE_UP	MORI_MATURE_B_LYMPHOCYTE_UP		50	-0.29637128	-1.1926508	0.14838709	0.47461197	1.0	698	tags=20%, list=9%, signal=22%
MIKKELSEN_ES_ICP_WITH_H3K4ME3	MIKKELSEN_ES_ICP_WITH_H3K4ME3		240	-0.23670837	-1.1924171	0.0	0.4741092	1.0	672	tags=17%, list=9%, signal=18%
JAEGER_METASTASIS_DN	JAEGER_METASTASIS_DN		111	-0.26281175	-1.1922802	0.14516129	0.47344705	1.0	1072	tags=27%, list=14%, signal=31%
WANG_ESOPHAGUS_CANCER_VS_NORMAL_UP	WANG_ESOPHAGUS_CANCER_VS_NORMAL_UP		81	-0.2809168	-1.191892	0.16161616	0.4732718	1.0	1024	tags=25%, list=14%, signal=28%
BOQUEST_STEM_CELL_DN	BOQUEST_STEM_CELL_DN		136	-0.2538918	-1.1914053	0.14285715	0.47338822	1.0	957	tags=25%, list=13%, signal=28%
EBAUER_TARGETS_OF_PAX3_FOXO1_FUSION_UP	EBAUER_TARGETS_OF_PAX3_FOXO1_FUSION_UP		112	-0.24978943	-1.1909832	0.057971016	0.4734237	1.0	957	tags=28%, list=13%, signal=31%
DING_LUNG_CANCER_MUTATED_SIGNIFICANTLY	DING_LUNG_CANCER_MUTATED_SIGNIFICANTLY		17	-0.39204898	-1.190255	0.24291497	0.47382122	1.0	1355	tags=47%, list=18%, signal=57%
ZHANG_TLX_TARGETS_DN	ZHANG_TLX_TARGETS_DN		71	-0.27464485	-1.1901904	0.15126051	0.4729938	1.0	964	tags=23%, list=13%, signal=26%
STREICHER_LSM1_TARGETS_UP	STREICHER_LSM1_TARGETS_UP		26	-0.34913856	-1.1897599	0.18181819	0.4729397	1.0	610	tags=27%, list=8%, signal=29%
ZHANG_GATA6_TARGETS_DN	ZHANG_GATA6_TARGETS_DN		29	-0.33560875	-1.1894835	0.21559633	0.47253904	1.0	1380	tags=38%, list=19%, signal=46%
HSIAO_LIVER_SPECIFIC_GENES	HSIAO_LIVER_SPECIFIC_GENES		165	-0.25264722	-1.188838	0.04347826	0.4729021	1.0	1585	tags=29%, list=21%, signal=36%
MARIADASON_RESPONSE_TO_CURCUMIN_SULINDAC_5	MARIADASON_RESPONSE_TO_CURCUMIN_SULINDAC_5		15	-0.39973125	-1.1885997	0.22178988	0.47248375	1.0	145	tags=13%, list=2%, signal=14%
GAVIN_FOXP3_TARGETS_CLUSTER_P3	GAVIN_FOXP3_TARGETS_CLUSTER_P3		73	-0.28462517	-1.1864041	0.14814815	0.47594443	1.0	670	tags=21%, list=9%, signal=22%
DELYS_THYROID_CANCER_DN	DELYS_THYROID_CANCER_DN		144	-0.253121	-1.1844426	0.06122449	0.47909546	1.0	701	tags=18%, list=9%, signal=20%
RASHI_RESPONSE_TO_IONIZING_RADIATION_2	RASHI_RESPONSE_TO_IONIZING_RADIATION_2		76	-0.27848515	-1.183042	0.15625	0.48097524	1.0	1268	tags=30%, list=17%, signal=36%
REACTOME_TRAFFICKING_OF_AMPA_RECEPTORS	REACTOME_TRAFFICKING_OF_AMPA_RECEPTORS		16	-0.41082785	-1.1828142	0.25316456	0.48046684	1.0	1670	tags=44%, list=22%, signal=56%
REACTOME_POST_CHAPERONIN_TUBULIN_FOLDING_PATHWAY	REACTOME_POST_CHAPERONIN_TUBULIN_FOLDING_PATHWAY		13	-0.41680855	-1.1826612	0.24014337	0.47990707	1.0	2520	tags=85%, list=34%, signal=128%
KATSANOU_ELAVL1_TARGETS_UP	KATSANOU_ELAVL1_TARGETS_UP		73	-0.27183595	-1.1819394	0.13461539	0.48037845	1.0	1018	tags=27%, list=14%, signal=31%
YAO_TEMPORAL_RESPONSE_TO_PROGESTERONE_CLUSTER_9	YAO_TEMPORAL_RESPONSE_TO_PROGESTERONE_CLUSTER_9		40	-0.32490376	-1.1818724	0.19318181	0.47957003	1.0	1245	tags=43%, list=17%, signal=51%
TSUNODA_CISPLATIN_RESISTANCE_DN	TSUNODA_CISPLATIN_RESISTANCE_DN		37	-0.31683463	-1.18064	0.20207255	0.4812072	1.0	933	tags=32%, list=13%, signal=37%
BIOCARTA_RHO_PATHWAY	BIOCARTA_RHO_PATHWAY		21	-0.3569834	-1.1792088	0.24686192	0.48327383	1.0	133	tags=10%, list=2%, signal=10%
HEDVAT_ELF4_TARGETS_UP	HEDVAT_ELF4_TARGETS_UP		11	-0.43731615	-1.1790987	0.25714287	0.48253176	1.0	229	tags=18%, list=3%, signal=19%
WIERENGA_STAT5A_TARGETS_UP	WIERENGA_STAT5A_TARGETS_UP		99	-0.2594238	-1.1777364	0.09090909	0.4842842	1.0	1180	tags=27%, list=16%, signal=32%
ROLEF_GLIS3_TARGETS	ROLEF_GLIS3_TARGETS		18	-0.38357508	-1.1773862	0.20576131	0.48402032	1.0	1380	tags=44%, list=19%, signal=54%
MANALO_HYPOXIA_UP	MANALO_HYPOXIA_UP		146	-0.2505659	-1.1761024	0.08695652	0.48570445	1.0	946	tags=23%, list=13%, signal=26%
REACTOME_THROMBIN_SIGNALLING_THROUGH_PROTEINASE_ACTIVATED_RECEPTORS_PARS	REACTOME_THROMBIN_SIGNALLING_THROUGH_PROTEINASE_ACTIVATED_RECEPTORS_PARS		17	-0.38973916	-1.1753687	0.23553719	0.48632637	1.0	1182	tags=24%, list=16%, signal=28%
HUPER_BREAST_BASAL_VS_LUMINAL_DN	HUPER_BREAST_BASAL_VS_LUMINAL_DN		35	-0.32475236	-1.1743432	0.2208589	0.48760197	1.0	424	tags=20%, list=6%, signal=21%
HENDRICKS_SMARCA4_TARGETS_DN	HENDRICKS_SMARCA4_TARGETS_DN		30	-0.3343377	-1.1742163	0.18877551	0.48690706	1.0	435	tags=20%, list=6%, signal=21%
BROWNE_HCMV_INFECTION_30MIN_UP	BROWNE_HCMV_INFECTION_30MIN_UP		31	-0.3264748	-1.1736408	0.19553073	0.48720637	1.0	1268	tags=32%, list=17%, signal=39%
REACTOME_COSTIMULATION_BY_THE_CD28_FAMILY	REACTOME_COSTIMULATION_BY_THE_CD28_FAMILY		33	-0.32844535	-1.1724839	0.18085106	0.48864228	1.0	1102	tags=42%, list=15%, signal=50%
RUTELLA_RESPONSE_TO_CSF2RB_AND_IL4_DN	RUTELLA_RESPONSE_TO_CSF2RB_AND_IL4_DN		225	-0.23634848	-1.1713736	0.0	0.49018073	1.0	1198	tags=23%, list=16%, signal=26%
VERHAAK_GLIOBLASTOMA_NEURAL	VERHAAK_GLIOBLASTOMA_NEURAL		121	-0.2531411	-1.171369	0.11111111	0.4892647	1.0	1500	tags=36%, list=20%, signal=44%
REACTOME_DCC_MEDIATED_ATTRACTIVE_SIGNALING	REACTOME_DCC_MEDIATED_ATTRACTIVE_SIGNALING		10	-0.44963464	-1.1712803	0.25597268	0.4885106	1.0	1565	tags=50%, list=21%, signal=63%
REACTOME_P130CAS_LINKAGE_TO_MAPK_SIGNALING_FOR_INTEGRINS	REACTOME_P130CAS_LINKAGE_TO_MAPK_SIGNALING_FOR_INTEGRINS		10	-0.45877638	-1.1700903	0.2647059	0.48995525	1.0	1056	tags=40%, list=14%, signal=47%
ST_GAQ_PATHWAY	ST_GAQ_PATHWAY		14	-0.40998062	-1.1693175	0.25287357	0.49067366	1.0	1163	tags=29%, list=16%, signal=34%
REACTOME_IMMUNOREGULATORY_INTERACTIONS_BETWEEN_A_LYMPHOID_AND_A_NON_LYMPHOID_CELL	REACTOME_IMMUNOREGULATORY_INTERACTIONS_BETWEEN_A_LYMPHOID_AND_A_NON_LYMPHOID_CELL		26	-0.3501517	-1.1687423	0.20560747	0.49096358	1.0	1360	tags=38%, list=18%, signal=47%
KEGG_GLYCEROPHOSPHOLIPID_METABOLISM	KEGG_GLYCEROPHOSPHOLIPID_METABOLISM		31	-0.34067598	-1.1679316	0.23474178	0.49182007	1.0	994	tags=23%, list=13%, signal=26%
BURTON_ADIPOGENESIS_PEAK_AT_2HR	BURTON_ADIPOGENESIS_PEAK_AT_2HR		43	-0.30169195	-1.167801	0.1754386	0.4911033	1.0	1443	tags=42%, list=19%, signal=52%
REACTOME_ACTIVATION_OF_NMDA_RECEPTOR_UPON_GLUTAMATE_BINDING_AND_POSTSYNAPTIC_EVENTS	REACTOME_ACTIVATION_OF_NMDA_RECEPTOR_UPON_GLUTAMATE_BINDING_AND_POSTSYNAPTIC_EVENTS		17	-0.3694347	-1.1648785	0.2406639	0.49662873	1.0	880	tags=41%, list=12%, signal=47%
MCMURRAY_TP53_HRAS_COOPERATION_RESPONSE_UP	MCMURRAY_TP53_HRAS_COOPERATION_RESPONSE_UP		10	-0.45092925	-1.1648526	0.2638889	0.4957469	1.0	924	tags=40%, list=12%, signal=46%
DOANE_BREAST_CANCER_CLASSES_DN	DOANE_BREAST_CANCER_CLASSES_DN		18	-0.3859063	-1.1639875	0.2601626	0.49669856	1.0	386	tags=28%, list=5%, signal=29%
KEGG_FC_GAMMA_R_MEDIATED_PHAGOCYTOSIS	KEGG_FC_GAMMA_R_MEDIATED_PHAGOCYTOSIS		52	-0.29279268	-1.1616659	0.18571429	0.50070095	1.0	669	tags=13%, list=9%, signal=15%
BURTON_ADIPOGENESIS_6	BURTON_ADIPOGENESIS_6		126	-0.25319394	-1.1596159	0.12962963	0.5042529	1.0	436	tags=11%, list=6%, signal=12%
TARTE_PLASMA_CELL_VS_B_LYMPHOCYTE_UP	TARTE_PLASMA_CELL_VS_B_LYMPHOCYTE_UP		57	-0.29071277	-1.1578735	0.23333333	0.50714046	1.0	1004	tags=18%, list=13%, signal=20%
PID_S1P_S1P4_PATHWAY	PID_S1P_S1P4_PATHWAY		12	-0.42194268	-1.1573948	0.26217228	0.50718653	1.0	2173	tags=67%, list=29%, signal=94%
RICKMAN_TUMOR_DIFFERENTIATED_WELL_VS_POORLY_DN	RICKMAN_TUMOR_DIFFERENTIATED_WELL_VS_POORLY_DN		165	-0.23772594	-1.1570703	0.032258064	0.5070534	1.0	1093	tags=23%, list=15%, signal=26%
REACTOME_CHOLESTEROL_BIOSYNTHESIS	REACTOME_CHOLESTEROL_BIOSYNTHESIS		20	-0.3668807	-1.1561456	0.2509804	0.50828147	1.0	2033	tags=60%, list=27%, signal=82%
RODWELL_AGING_KIDNEY_NO_BLOOD_DN	RODWELL_AGING_KIDNEY_NO_BLOOD_DN		97	-0.24956498	-1.1554289	0.11290322	0.5089323	1.0	426	tags=11%, list=6%, signal=12%
KEGG_ECM_RECEPTOR_INTERACTION	KEGG_ECM_RECEPTOR_INTERACTION		56	-0.27819762	-1.1549566	0.17557251	0.5090259	1.0	1117	tags=32%, list=15%, signal=38%
BIOCARTA_MTA3_PATHWAY	BIOCARTA_MTA3_PATHWAY		13	-0.40759426	-1.1543741	0.25461254	0.5093874	1.0	753	tags=31%, list=10%, signal=34%
SENESE_HDAC1_AND_HDAC2_TARGETS_UP	SENESE_HDAC1_AND_HDAC2_TARGETS_UP		114	-0.24405736	-1.153721	0.10638298	0.50988585	1.0	1119	tags=24%, list=15%, signal=27%
REACTOME_ADP_SIGNALLING_THROUGH_P2RY1	REACTOME_ADP_SIGNALLING_THROUGH_P2RY1		14	-0.39672905	-1.1535083	0.2777778	0.5094559	1.0	1154	tags=21%, list=16%, signal=25%
WHITEHURST_PACLITAXEL_SENSITIVITY	WHITEHURST_PACLITAXEL_SENSITIVITY		13	-0.4089469	-1.1529838	0.27675277	0.5096826	1.0	1344	tags=31%, list=18%, signal=37%
VANDESLUIS_COMMD1_TARGETS_GROUP_4_UP	VANDESLUIS_COMMD1_TARGETS_GROUP_4_UP		10	-0.43083796	-1.1527863	0.26640928	0.5092038	1.0	605	tags=40%, list=8%, signal=43%
WAGNER_APO2_SENSITIVITY	WAGNER_APO2_SENSITIVITY		10	-0.4360451	-1.1524724	0.296875	0.50892293	1.0	1362	tags=60%, list=18%, signal=73%
AMIT_EGF_RESPONSE_60_MCF10A	AMIT_EGF_RESPONSE_60_MCF10A		31	-0.32490936	-1.1502514	0.24299066	0.51292527	1.0	1204	tags=32%, list=16%, signal=38%
REACTOME_BOTULINUM_NEUROTOXICITY	REACTOME_BOTULINUM_NEUROTOXICITY		14	-0.41314486	-1.1498265	0.2857143	0.51291156	1.0	1945	tags=57%, list=26%, signal=77%
KOHOUTEK_CCNT2_TARGETS	KOHOUTEK_CCNT2_TARGETS		23	-0.3507949	-1.1486055	0.24901186	0.5146792	1.0	520	tags=26%, list=7%, signal=28%
MCCABE_HOXC6_TARGETS_CANCER_UP	MCCABE_HOXC6_TARGETS_CANCER_UP		16	-0.38125798	-1.1485174	0.27862597	0.5139307	1.0	260	tags=13%, list=3%, signal=13%
HELLEBREKERS_SILENCED_DURING_TUMOR_ANGIOGENESIS	HELLEBREKERS_SILENCED_DURING_TUMOR_ANGIOGENESIS		49	-0.29204747	-1.1468203	0.23308271	0.5166736	1.0	1024	tags=27%, list=14%, signal=31%
LEIN_OLIGODENDROCYTE_MARKERS	LEIN_OLIGODENDROCYTE_MARKERS		34	-0.3070676	-1.146767	0.18562874	0.5158452	1.0	1306	tags=32%, list=18%, signal=39%
FIGUEROA_AML_METHYLATION_CLUSTER_6_UP	FIGUEROA_AML_METHYLATION_CLUSTER_6_UP		58	-0.2881194	-1.1467493	0.20769231	0.51495427	1.0	752	tags=22%, list=10%, signal=25%
AMIT_SERUM_RESPONSE_60_MCF10A	AMIT_SERUM_RESPONSE_60_MCF10A		41	-0.300092	-1.1461315	0.22485207	0.5154531	1.0	1411	tags=41%, list=19%, signal=51%
SARRIO_EPITHELIAL_MESENCHYMAL_TRANSITION_DN	SARRIO_EPITHELIAL_MESENCHYMAL_TRANSITION_DN		100	-0.24583319	-1.1451098	0.10294118	0.5167825	1.0	1163	tags=29%, list=16%, signal=34%
PID_TCRCALCIUMPATHWAY	PID_TCRCALCIUMPATHWAY		15	-0.38465974	-1.1446444	0.28014183	0.51695055	1.0	229	tags=13%, list=3%, signal=14%
WOO_LIVER_CANCER_RECURRENCE_DN	WOO_LIVER_CANCER_RECURRENCE_DN		44	-0.2991016	-1.1442047	0.21893491	0.51698613	1.0	1493	tags=30%, list=20%, signal=37%
SCHUETZ_BREAST_CANCER_DUCTAL_INVASIVE_DN	SCHUETZ_BREAST_CANCER_DUCTAL_INVASIVE_DN		49	-0.29160592	-1.1437459	0.25	0.5170996	1.0	930	tags=31%, list=13%, signal=35%
REACTOME_INTERFERON_GAMMA_SIGNALING	REACTOME_INTERFERON_GAMMA_SIGNALING		35	-0.31451103	-1.1416401	0.24413146	0.52077013	1.0	984	tags=29%, list=13%, signal=33%
KLEIN_PRIMARY_EFFUSION_LYMPHOMA_DN	KLEIN_PRIMARY_EFFUSION_LYMPHOMA_DN		39	-0.30268204	-1.1415766	0.22105263	0.5199613	1.0	782	tags=26%, list=11%, signal=29%
MARTINEZ_RESPONSE_TO_TRABECTEDIN_UP	MARTINEZ_RESPONSE_TO_TRABECTEDIN_UP		56	-0.27618515	-1.1415058	0.19424461	0.5191993	1.0	393	tags=11%, list=5%, signal=11%
SANCHEZ_MDM2_TARGETS	SANCHEZ_MDM2_TARGETS		13	-0.4121532	-1.1409225	0.30960855	0.51958746	1.0	589	tags=23%, list=8%, signal=25%
CROMER_TUMORIGENESIS_DN	CROMER_TUMORIGENESIS_DN		24	-0.34572	-1.1407684	0.2798165	0.5190401	1.0	323	tags=21%, list=4%, signal=22%
MEISSNER_NPC_HCP_WITH_H3K4ME3_AND_H3K27ME3	MEISSNER_NPC_HCP_WITH_H3K4ME3_AND_H3K27ME3		39	-0.30088103	-1.1385834	0.26785713	0.52274704	1.0	950	tags=31%, list=13%, signal=35%
BROWNE_HCMV_INFECTION_8HR_UP	BROWNE_HCMV_INFECTION_8HR_UP		59	-0.27424344	-1.1383297	0.15671642	0.5223454	1.0	1070	tags=25%, list=14%, signal=29%
SMID_BREAST_CANCER_RELAPSE_IN_BONE_DN	SMID_BREAST_CANCER_RELAPSE_IN_BONE_DN		175	-0.23444681	-1.1383156	0.14285715	0.5214542	1.0	650	tags=17%, list=9%, signal=18%
CHYLA_CBFA2T3_TARGETS_UP	CHYLA_CBFA2T3_TARGETS_UP		141	-0.24175215	-1.1377966	0.094339624	0.52164036	1.0	1039	tags=24%, list=14%, signal=27%
DEMAGALHAES_AGING_UP	DEMAGALHAES_AGING_UP		40	-0.30603555	-1.13753	0.25	0.52133495	1.0	992	tags=28%, list=13%, signal=32%
TURASHVILI_BREAST_NORMAL_DUCTAL_VS_LOBULAR_UP	TURASHVILI_BREAST_NORMAL_DUCTAL_VS_LOBULAR_UP		27	-0.3317758	-1.1370429	0.25925925	0.5214694	1.0	542	tags=26%, list=7%, signal=28%
MCBRYAN_PUBERTAL_BREAST_3_4WK_DN	MCBRYAN_PUBERTAL_BREAST_3_4WK_DN		25	-0.3319451	-1.1368145	0.2755102	0.5210922	1.0	924	tags=32%, list=12%, signal=36%
AMIT_SERUM_RESPONSE_20_MCF10A	AMIT_SERUM_RESPONSE_20_MCF10A		14	-0.40507138	-1.1364969	0.3115942	0.5208799	1.0	1217	tags=36%, list=16%, signal=43%
ONDER_CDH1_TARGETS_2_UP	ONDER_CDH1_TARGETS_2_UP		185	-0.23259838	-1.134973	0.14285715	0.5233043	1.0	808	tags=18%, list=11%, signal=20%
IKEDA_MIR30_TARGETS_DN	IKEDA_MIR30_TARGETS_DN		16	-0.382754	-1.1332825	0.30882353	0.5262058	1.0	1455	tags=38%, list=20%, signal=47%
VERHAAK_GLIOBLASTOMA_MESENCHYMAL	VERHAAK_GLIOBLASTOMA_MESENCHYMAL		125	-0.24565417	-1.1332343	0.171875	0.52539635	1.0	840	tags=17%, list=11%, signal=19%
LINDSTEDT_DENDRITIC_CELL_MATURATION_B	LINDSTEDT_DENDRITIC_CELL_MATURATION_B		33	-0.31475425	-1.1330491	0.27586207	0.52492845	1.0	497	tags=15%, list=7%, signal=16%
CROONQUIST_NRAS_SIGNALING_UP	CROONQUIST_NRAS_SIGNALING_UP		20	-0.36706245	-1.1325413	0.29787233	0.5251518	1.0	352	tags=20%, list=5%, signal=21%
HUTTMANN_B_CLL_POOR_SURVIVAL_UP	HUTTMANN_B_CLL_POOR_SURVIVAL_UP		167	-0.23812576	-1.1324986	0.16129032	0.5243331	1.0	844	tags=23%, list=11%, signal=25%
NUTT_GBM_VS_AO_GLIOMA_UP	NUTT_GBM_VS_AO_GLIOMA_UP		40	-0.30091208	-1.1302261	0.23157895	0.528626	1.0	1005	tags=25%, list=14%, signal=29%
LEE_AGING_MUSCLE_UP	LEE_AGING_MUSCLE_UP		32	-0.31579417	-1.1295944	0.2513089	0.52921563	1.0	1715	tags=47%, list=23%, signal=61%
REACTOME_G_ALPHA_I_SIGNALLING_EVENTS	REACTOME_G_ALPHA_I_SIGNALLING_EVENTS		67	-0.26745677	-1.1294413	0.19548872	0.528656	1.0	733	tags=18%, list=10%, signal=20%
JOHNSTONE_PARVB_TARGETS_3_UP	JOHNSTONE_PARVB_TARGETS_3_UP		274	-0.20482099	-1.1291045	0.09090909	0.5284521	1.0	832	tags=17%, list=11%, signal=19%
PID_P38ALPHABETAPATHWAY	PID_P38ALPHABETAPATHWAY		19	-0.35651982	-1.1278119	0.2542373	0.5306491	1.0	669	tags=26%, list=9%, signal=29%
REACTOME_CELL_SURFACE_INTERACTIONS_AT_THE_VASCULAR_WALL	REACTOME_CELL_SURFACE_INTERACTIONS_AT_THE_VASCULAR_WALL		56	-0.27809054	-1.1264571	0.20769231	0.53283185	1.0	1191	tags=29%, list=16%, signal=34%
ROZANOV_MMP14_TARGETS_DN	ROZANOV_MMP14_TARGETS_DN		20	-0.34952655	-1.1254814	0.29694322	0.534151	1.0	1502	tags=40%, list=20%, signal=50%
CHEN_LVAD_SUPPORT_OF_FAILING_HEART_UP	CHEN_LVAD_SUPPORT_OF_FAILING_HEART_UP		84	-0.25635013	-1.1252499	0.21176471	0.53379774	1.0	1260	tags=30%, list=17%, signal=35%
PID_INTEGRIN5_PATHWAY	PID_INTEGRIN5_PATHWAY		12	-0.4167426	-1.1234542	0.30111524	0.53693104	1.0	956	tags=50%, list=13%, signal=57%
KEGG_ENDOCYTOSIS	KEGG_ENDOCYTOSIS		99	-0.25538415	-1.1225941	0.18571429	0.53803766	1.0	1380	tags=28%, list=19%, signal=34%
ST_GRANULE_CELL_SURVIVAL_PATHWAY	ST_GRANULE_CELL_SURVIVAL_PATHWAY		19	-0.37534314	-1.1224415	0.28278688	0.5374878	1.0	895	tags=37%, list=12%, signal=42%
DARWICHE_PAPILLOMA_RISK_HIGH_VS_LOW_DN	DARWICHE_PAPILLOMA_RISK_HIGH_VS_LOW_DN		11	-0.42500088	-1.12156	0.30769232	0.53868085	1.0	1612	tags=55%, list=22%, signal=70%
LEE_EARLY_T_LYMPHOCYTE_DN	LEE_EARLY_T_LYMPHOCYTE_DN		36	-0.30129442	-1.1214385	0.26966292	0.5380274	1.0	1360	tags=33%, list=18%, signal=41%
REACTOME_FORMATION_OF_FIBRIN_CLOT_CLOTTING_CASCADE	REACTOME_FORMATION_OF_FIBRIN_CLOT_CLOTTING_CASCADE		22	-0.335356	-1.1207204	0.26785713	0.5386301	1.0	1056	tags=23%, list=14%, signal=26%
MARTORIATI_MDM4_TARGETS_FETAL_LIVER_UP	MARTORIATI_MDM4_TARGETS_FETAL_LIVER_UP		117	-0.24554881	-1.1200153	0.21666667	0.53932047	1.0	605	tags=15%, list=8%, signal=16%
MYLLYKANGAS_AMPLIFICATION_HOT_SPOT_17	MYLLYKANGAS_AMPLIFICATION_HOT_SPOT_17		10	-0.43258202	-1.1193773	0.29738563	0.53971237	1.0	1081	tags=50%, list=15%, signal=58%
FULCHER_INFLAMMATORY_RESPONSE_LECTIN_VS_LPS_UP	FULCHER_INFLAMMATORY_RESPONSE_LECTIN_VS_LPS_UP		293	-0.21409126	-1.1193316	0.16666667	0.53889525	1.0	964	tags=18%, list=13%, signal=20%
REACTOME_CELL_JUNCTION_ORGANIZATION	REACTOME_CELL_JUNCTION_ORGANIZATION		29	-0.32006943	-1.1189251	0.28365386	0.5388991	1.0	704	tags=24%, list=9%, signal=27%
TOMLINS_PROSTATE_CANCER_DN	TOMLINS_PROSTATE_CANCER_DN		30	-0.31489673	-1.1187676	0.25	0.5383597	1.0	688	tags=23%, list=9%, signal=26%
STOSSI_RESPONSE_TO_ESTRADIOL	STOSSI_RESPONSE_TO_ESTRADIOL		26	-0.33594075	-1.1180873	0.24152543	0.5390338	1.0	529	tags=19%, list=7%, signal=21%
HOWLIN_PUBERTAL_MAMMARY_GLAND	HOWLIN_PUBERTAL_MAMMARY_GLAND		37	-0.29854846	-1.1176419	0.25142857	0.53922004	1.0	1338	tags=32%, list=18%, signal=39%
HERNANDEZ_MITOTIC_ARREST_BY_DOCETAXEL_2_DN	HERNANDEZ_MITOTIC_ARREST_BY_DOCETAXEL_2_DN		10	-0.41548088	-1.1165481	0.32153392	0.54091203	1.0	199	tags=20%, list=3%, signal=21%
XU_RESPONSE_TO_TRETINOIN_AND_NSC682994_UP	XU_RESPONSE_TO_TRETINOIN_AND_NSC682994_UP		15	-0.37534374	-1.116128	0.3030303	0.5409562	1.0	957	tags=40%, list=13%, signal=46%
SERVITJA_ISLET_HNF1A_TARGETS_DN	SERVITJA_ISLET_HNF1A_TARGETS_DN		36	-0.30327716	-1.1154245	0.25252524	0.5417559	1.0	630	tags=19%, list=8%, signal=21%
HOFFMANN_SMALL_PRE_BII_TO_IMMATURE_B_LYMPHOCYTE_UP	HOFFMANN_SMALL_PRE_BII_TO_IMMATURE_B_LYMPHOCYTE_UP		40	-0.30836827	-1.1118462	0.2947977	0.5489983	1.0	605	tags=23%, list=8%, signal=24%
AMIT_EGF_RESPONSE_480_MCF10A	AMIT_EGF_RESPONSE_480_MCF10A		29	-0.3184657	-1.1107938	0.27403846	0.55044436	1.0	471	tags=21%, list=6%, signal=22%
BRUINS_UVC_RESPONSE_VIA_TP53_GROUP_B	BRUINS_UVC_RESPONSE_VIA_TP53_GROUP_B		236	-0.22041012	-1.1104784	0.083333336	0.550282	1.0	1207	tags=29%, list=16%, signal=33%
IVANOVA_HEMATOPOIESIS_STEM_CELL_LONG_TERM	IVANOVA_HEMATOPOIESIS_STEM_CELL_LONG_TERM		133	-0.23435293	-1.1088334	0.21153846	0.5530459	1.0	865	tags=17%, list=12%, signal=18%
KAYO_CALORIE_RESTRICTION_MUSCLE_UP	KAYO_CALORIE_RESTRICTION_MUSCLE_UP		67	-0.26323998	-1.1084249	0.24369748	0.5530361	1.0	333	tags=10%, list=4%, signal=11%
WU_CELL_MIGRATION	WU_CELL_MIGRATION		126	-0.24095017	-1.1080066	0.22807017	0.5530431	1.0	723	tags=19%, list=10%, signal=21%
CHIANG_LIVER_CANCER_SUBCLASS_PROLIFERATION_DN	CHIANG_LIVER_CANCER_SUBCLASS_PROLIFERATION_DN		81	-0.25511855	-1.1069819	0.21649484	0.55453736	1.0	1213	tags=25%, list=16%, signal=29%
SCHAEFFER_PROSTATE_DEVELOPMENT_12HR_DN	SCHAEFFER_PROSTATE_DEVELOPMENT_12HR_DN		40	-0.28822103	-1.10531	0.2802198	0.5576808	1.0	1464	tags=38%, list=20%, signal=46%
PID_ERBB1_INTERNALIZATION_PATHWAY	PID_ERBB1_INTERNALIZATION_PATHWAY		30	-0.3083928	-1.1051954	0.26153848	0.55698615	1.0	1191	tags=30%, list=16%, signal=36%
TURASHVILI_BREAST_LOBULAR_CARCINOMA_VS_LOBULAR_NORMAL_UP	TURASHVILI_BREAST_LOBULAR_CARCINOMA_VS_LOBULAR_NORMAL_UP		42	-0.28914294	-1.1047746	0.2682927	0.55710477	1.0	1431	tags=38%, list=19%, signal=47%
KOBAYASHI_RESPONSE_TO_ROMIDEPSIN	KOBAYASHI_RESPONSE_TO_ROMIDEPSIN		11	-0.411728	-1.1045682	0.307971	0.55664724	1.0	1171	tags=36%, list=16%, signal=43%
KEGG_NOD_LIKE_RECEPTOR_SIGNALING_PATHWAY	KEGG_NOD_LIKE_RECEPTOR_SIGNALING_PATHWAY		26	-0.3182136	-1.1041398	0.28169015	0.5566786	1.0	160	tags=8%, list=2%, signal=8%
[truncated: 541 more rows]

## Sheet: DePreter_r3vsr1_report_r3
NAME	GS<br> follow link to MSigDB	GS DETAILS	SIZE	ES	NES	NOM p-val	FDR q-val	FWER p-val	RANK AT MAX	LEADING EDGE
[truncated: 1,631 more rows]

[truncated: 42 more sheets: DePreter_r3vsr1_r3_abs, DePreter_r3vsr1_report_r1, DePreter_r4vsr1_report_r4, DePreter_r4vsr1_report_r1, DePreter_r3vsr2_report_r3, DePreter_r3vsr2_report_r2, DePreter_r4vsr2_report_r4, DePreter_r4vsr2_report_r2, DePreter_r4vsr3_report_r4, DePreter_r4vsr3_report_r3, McArdle-Wilzén_r2vsr1_report_r2, McArdle-Wilzén_r2vsr1_report_r1, McArdle-Wilzén_r3vsr1_report_r3, McArdle-Wilzén_r3vsr1_r3_abs, McArdle-Wilzén_r3vsr1_report_r1, McArdle_Wilzén_r4vsr1_report_r4, McArdle_Wilzén_r4vsr1_report_r1, McArdle_Wilzén_r3vsr2_report_r3, McArdle_Wilzén_r3vsr2_report_r2, McArdle_Wilzén_r4vsr2_report_r4 …]
